# Supplementary material for: Transcriptomic Analysis of Acclimation to Temperature and Light Stress in Saccharina latissima (Phaeophyceae)
Source: PLoS One. 2012 Aug 28;7(8):e44342. doi: 10.1371/journal.pone.0044342 (PMC3429442; doi:10.1371/journal.pone.0044342)
Supplement: Table S1 — Full list of over-represented Gene Ontology terms for all sections of the Venn diagrams. (XLS) [file pone.0044342.s001.xls]

## Sheet: Venn diagram 2°C  
2°C high PAR up-regulated
GO-ID	Term	Category	FDR	P-Value	#Test	#Ref	Over/Under	TestSeqs	RefSeqs
GO:0044106	cellular amine metabolic process	P	0.000341649	1.66603e-07	41	204	over	contig08798, contig01921, contig16098, contig09881, contig16202, contig09018, contig27166, contig07600, contig12013, contig02539, contig04610, contig19542, contig11463, contig08538, contig16277, contig06332, contig12548, contig18587, contig07837, contig26285, contig13827, contig11700, contig06186, contig05682, contig05683, contig05670, contig12478, contig01422, contig06972, contig10869, contig021…	contig18249, contig23983, contig06649, contig05115, contig18216, contig14163, contig24130, contig25986, contig17587, contig13483, contig20503, contig08763, contig16068, contig16048, contig01994, contig06589, contig02640, contig05259, contig14271, contig18370, contig11342, contig00420, contig17870, contig17748, contig07621, contig07615, contig25866, contig20655, contig10453, contig20687, contig113…
GO:0006520	cellular amino acid metabolic process	P	0.000341649	2.06715e-07	39	189	over	contig08798, contig01921, contig16098, contig09881, contig16202, contig09018, contig27166, contig07600, contig12013, contig02539, contig04610, contig19542, contig08538, contig16277, contig06332, contig12548, contig18587, contig07837, contig26285, contig13827, contig11700, contig06186, contig05682, contig05683, contig12478, contig01422, contig06972, contig10869, contig02106, contig27648, contig152…	contig23983, contig06649, contig05115, contig18216, contig14163, contig24130, contig25986, contig13483, contig20503, contig08763, contig16068, contig16048, contig01994, contig06589, contig02640, contig05259, contig14271, contig18370, contig11342, contig00420, contig17870, contig17748, contig07621, contig07615, contig25866, contig10453, contig20687, contig11310, contig19063, contig02596, contig086…
GO:0009308	amine metabolic process	P	0.000589665	5.1037e-07	41	213	over	contig08798, contig01921, contig16098, contig09881, contig16202, contig09018, contig27166, contig07600, contig12013, contig02539, contig04610, contig19542, contig11463, contig08538, contig16277, contig06332, contig12548, contig18587, contig07837, contig26285, contig13827, contig11700, contig06186, contig05682, contig05683, contig05670, contig12478, contig01422, contig06972, contig10869, contig021…	contig18249, contig23983, contig06649, contig05115, contig18216, contig14163, contig24130, contig07717, contig25939, contig25986, contig17587, contig13483, contig20503, contig08763, contig16068, contig16048, contig01994, contig06589, contig02640, contig05259, contig14271, contig18370, contig11342, contig00420, contig17870, contig17748, contig07621, contig07615, contig25866, contig20655, contig104…
GO:0006519	cellular amino acid and derivative metabolic process	P	0.00190547	2.01759e-06	41	226	over	contig08798, contig01921, contig16098, contig09881, contig16202, contig09018, contig27166, contig07600, contig12013, contig02539, contig04610, contig19542, contig11463, contig08538, contig16277, contig06332, contig12548, contig18587, contig07837, contig26285, contig13827, contig11700, contig06186, contig05682, contig05683, contig05670, contig12478, contig01422, contig06972, contig10869, contig021…	contig18249, contig23983, contig06649, contig05115, contig18216, contig14163, contig24130, contig11227, contig25986, contig07658, contig17587, contig13483, contig20503, contig08763, contig16068, contig16048, contig01994, contig06589, contig02640, contig05259, contig14271, contig18370, contig04773, contig09816, contig11342, contig00420, contig17870, contig17748, contig07621, contig07615, contig258…
GO:0006541	glutamine metabolic process	P	0.00294937	6.37967e-06	9	12	over	contig16202, contig02539, contig04610, contig06332, contig12548, contig11700, contig04375, contig12276, contig07327	contig11310, contig06478, contig15646, contig04609, contig25393, contig09250, contig01223, contig11766, contig19374, contig26108, contig18966, contig05546
GO:0009064	glutamine family amino acid metabolic process	P	0.00294937	6.69219e-06	14	36	over	contig16202, contig09018, contig27166, contig02539, contig04610, contig06332, contig12548, contig11700, contig06972, contig08991, contig04375, contig12276, contig11184, contig07327	contig24130, contig11342, contig11310, contig21695, contig06478, contig15646, contig04609, contig18425, contig07999, contig25393, contig04698, contig04697, contig19602, contig05821, contig09250, contig09248, contig01223, contig05954, contig05953, contig12603, contig13865, contig11766, contig17197, contig19374, contig14676, contig21264, contig26108, contig06968, contig09328, contig02188, contig189…
GO:0034201	response to oleic acid	P	0.00294937	9.36874e-06	6	3	over	contig04610, contig06332, contig11700, contig02106, contig04375, contig12276	contig11310, contig04609, contig19374
GO:0070542	response to fatty acid	P	0.00294937	9.36874e-06	6	3	over	contig04610, contig06332, contig11700, contig02106, contig04375, contig12276	contig11310, contig04609, contig19374
GO:0045909	positive regulation of vasodilation	P	0.00294937	9.36874e-06	6	3	over	contig04610, contig06332, contig11700, contig02106, contig04375, contig12276	contig11310, contig04609, contig19374
GO:0042312	regulation of vasodilation	P	0.00294937	9.36874e-06	6	3	over	contig04610, contig06332, contig11700, contig02106, contig04375, contig12276	contig11310, contig04609, contig19374
GO:0042311	vasodilation	P	0.00294937	9.36874e-06	6	3	over	contig04610, contig06332, contig11700, contig02106, contig04375, contig12276	contig11310, contig04609, contig19374
GO:0005980	glycogen catabolic process	P	0.00294937	9.36874e-06	6	3	over	contig04610, contig06332, contig11700, contig02106, contig04375, contig12276	contig11310, contig04609, contig19374
GO:0044247	cellular polysaccharide catabolic process	P	0.00294937	9.36874e-06	6	3	over	contig04610, contig06332, contig11700, contig02106, contig04375, contig12276	contig11310, contig04609, contig19374
GO:0019433	triglyceride catabolic process	P	0.00538791	2.20048e-05	6	4	over	contig04610, contig06332, contig11700, contig02106, contig04375, contig12276	contig11310, contig04609, contig19374, contig08947
GO:0046503	glycerolipid catabolic process	P	0.00538791	2.20048e-05	6	4	over	contig04610, contig06332, contig11700, contig02106, contig04375, contig12276	contig11310, contig04609, contig19374, contig08947
GO:0046461	neutral lipid catabolic process	P	0.00538791	2.20048e-05	6	4	over	contig04610, contig06332, contig11700, contig02106, contig04375, contig12276	contig11310, contig04609, contig19374, contig08947
GO:0044269	glycerol ether catabolic process	P	0.00538791	2.20048e-05	6	4	over	contig04610, contig06332, contig11700, contig02106, contig04375, contig12276	contig11310, contig04609, contig19374, contig08947
GO:0046464	acylglycerol catabolic process	P	0.00538791	2.20048e-05	6	4	over	contig04610, contig06332, contig11700, contig02106, contig04375, contig12276	contig11310, contig04609, contig19374, contig08947
GO:0033762	response to glucagon stimulus	P	0.00538791	2.20048e-05	6	4	over	contig04610, contig06332, contig11700, contig02106, contig04375, contig12276	contig11310, contig04609, contig19374, contig09483
GO:0014075	response to amine stimulus	P	0.00591447	2.505e-05	8	11	over	contig04610, contig06332, contig18587, contig26285, contig11700, contig02106, contig04375, contig12276	contig14959, contig19838, contig11310, contig04609, contig15299, contig11744, contig19374, contig09483, contig21265, contig28108, contig18092
GO:0006638	neutral lipid metabolic process	P	0.0081271	3.68799e-05	7	8	over	contig04610, contig06332, contig11700, contig03669, contig02106, contig04375, contig12276	contig11310, contig12037, contig04609, contig14801, contig14055, contig19374, contig06707, contig08947
GO:0006639	acylglycerol metabolic process	P	0.0081271	3.68799e-05	7	8	over	contig04610, contig06332, contig11700, contig03669, contig02106, contig04375, contig12276	contig11310, contig12037, contig04609, contig14801, contig14055, contig19374, contig06707, contig08947
GO:0033993	response to lipid	P	0.00911218	4.54851e-05	6	5	over	contig04610, contig06332, contig11700, contig02106, contig04375, contig12276	contig11310, contig04609, contig19374, contig09372, contig19279
GO:0046209	nitric oxide metabolic process	P	0.00911218	4.54851e-05	6	5	over	contig04610, contig06332, contig11700, contig02106, contig04375, contig12276	contig12805, contig11310, contig04609, contig04574, contig19374
GO:0009309	amine biosynthetic process	P	0.0104321	5.42254e-05	21	94	over	contig16098, contig09881, contig16202, contig09018, contig27166, contig12013, contig02539, contig04610, contig19542, contig16277, contig06332, contig12548, contig07837, contig13827, contig11700, contig05670, contig06972, contig15232, contig08991, contig11184, contig07327	contig23983, contig06649, contig05115, contig14163, contig17587, contig13483, contig08763, contig16068, contig16048, contig06589, contig14271, contig00420, contig17870, contig17748, contig07621, contig07615, contig20655, contig10453, contig19063, contig27243, contig08619, contig21695, contig01063, contig12091, contig15641, contig12076, contig06478, contig15646, contig18425, contig07999, contig070…
GO:0008652	cellular amino acid biosynthetic process	P	0.0104321	5.7973e-05	20	87	over	contig16098, contig09881, contig16202, contig09018, contig27166, contig12013, contig02539, contig04610, contig19542, contig16277, contig06332, contig12548, contig07837, contig13827, contig11700, contig06972, contig15232, contig08991, contig11184, contig07327	contig23983, contig06649, contig05115, contig14163, contig13483, contig08763, contig16068, contig16048, contig06589, contig14271, contig00420, contig17870, contig17748, contig07621, contig07615, contig10453, contig19063, contig08619, contig21695, contig01063, contig12091, contig15641, contig12076, contig06478, contig15646, contig18425, contig07999, contig07013, contig19602, contig01372, contig114…
GO:0051384	response to glucocorticoid stimulus	P	0.0104321	6.15417e-05	7	9	over	contig17638, contig04610, contig06332, contig11700, contig02106, contig04375, contig12276	contig25986, contig22085, contig11310, contig04609, contig07999, contig09278, contig19374, contig09483, contig18966
GO:0031960	response to corticosteroid stimulus	P	0.0104321	6.15417e-05	7	9	over	contig17638, contig04610, contig06332, contig11700, contig02106, contig04375, contig12276	contig25986, contig22085, contig11310, contig04609, contig07999, contig09278, contig19374, contig09483, contig18966
GO:0009251	glucan catabolic process	P	0.0135818	8.54796e-05	6	6	over	contig04610, contig06332, contig11700, contig02106, contig04375, contig12276	contig11310, contig04609, contig19374, contig03674, contig03673, contig16596
GO:0018904	organic ether metabolic process	P	0.0138139	9.82083e-05	7	10	over	contig04610, contig06332, contig11700, contig03669, contig02106, contig04375, contig12276	contig11310, contig12037, contig04609, contig11406, contig14801, contig14055, contig19374, contig02844, contig06707, contig08947
GO:0006662	glycerol ether metabolic process	P	0.0138139	9.82083e-05	7	10	over	contig04610, contig06332, contig11700, contig03669, contig02106, contig04375, contig12276	contig11310, contig12037, contig04609, contig11406, contig14801, contig14055, contig19374, contig02844, contig06707, contig08947
GO:0046112	nucleobase biosynthetic process	P	0.0138139	9.82083e-05	7	10	over	contig15795, contig04610, contig06332, contig11700, contig04375, contig12276, contig05559	contig06549, contig11310, contig12894, contig04609, contig14713, contig10517, contig15039, contig19374, contig02176, contig08021
GO:0006641	triglyceride metabolic process	P	0.0197244	0.000149178	6	7	over	contig04610, contig06332, contig11700, contig02106, contig04375, contig12276	contig11310, contig12037, contig04609, contig14801, contig14055, contig19374, contig08947
GO:0005977	glycogen metabolic process	P	0.0197244	0.000149178	6	7	over	contig04610, contig06332, contig11700, contig02106, contig04375, contig12276	contig11310, contig04609, contig13603, contig14031, contig12323, contig19374, contig04264
GO:0044271	cellular nitrogen compound biosynthetic process	P	0.0197377	0.000152265	37	238	over	contig15795, contig16098, contig01165, contig09881, contig16202, contig09018, contig14212, contig03151, contig27166, contig12013, contig02539, contig04610, contig19542, contig16277, contig06332, contig12548, contig07837, contig27373, contig13827, contig11700, contig05670, contig16819, contig15385, contig04136, contig06972, contig02106, contig27613, contig15232, contig15246, contig08991, contig017…	contig03345, contig23983, contig06649, contig05115, contig14172, contig04863, contig03340, contig14163, contig23081, contig14109, contig09914, contig06604, contig09928, contig09932, contig11251, contig11280, contig24182, contig10359, contig17587, contig13483, contig08754, contig10312, contig01923, contig08773, contig16086, contig19836, contig08763, contig16068, contig16048, contig03291, contig052…
GO:0043436	oxoacid metabolic process	P	0.0216669	0.000175259	45	316	over	contig17677, contig08798, contig01921, contig08759, contig16098, contig16045, contig09881, contig16202, contig09018, contig27166, contig07600, contig12013, contig02539, contig04610, contig19542, contig08538, contig16277, contig06332, contig12548, contig18587, contig07837, contig26285, contig13827, contig11700, contig26222, contig06186, contig12307, contig05682, contig05683, contig05670, contig124…	contig14147, contig23983, contig06649, contig05115, contig18216, contig14163, contig23085, contig24130, contig18209, contig09926, contig25939, contig25986, contig07658, contig13483, contig08740, contig20503, contig08763, contig16097, contig16068, contig15733, contig09831, contig16048, contig15707, contig01994, contig06589, contig02640, contig14283, contig24906, contig24907, contig05259, contig142…
GO:0019752	carboxylic acid metabolic process	P	0.0216669	0.000175259	45	316	over	contig17677, contig08798, contig01921, contig08759, contig16098, contig16045, contig09881, contig16202, contig09018, contig27166, contig07600, contig12013, contig02539, contig04610, contig19542, contig08538, contig16277, contig06332, contig12548, contig18587, contig07837, contig26285, contig13827, contig11700, contig26222, contig06186, contig12307, contig05682, contig05683, contig05670, contig124…	contig14147, contig23983, contig06649, contig05115, contig18216, contig14163, contig23085, contig24130, contig18209, contig09926, contig25939, contig25986, contig07658, contig13483, contig08740, contig20503, contig08763, contig16097, contig16068, contig15733, contig09831, contig16048, contig15707, contig01994, contig06589, contig02640, contig14283, contig24906, contig24907, contig05259, contig142…
GO:0009084	glutamine family amino acid biosynthetic process	P	0.0216669	0.000176979	8	16	over	contig16202, contig09018, contig02539, contig06332, contig12548, contig11700, contig08991, contig11184	contig21695, contig06478, contig15646, contig18425, contig07999, contig09248, contig12603, contig19374, contig14676, contig26108, contig09328, contig18966, contig15504, contig19167, contig13364, contig05546
GO:0009112	nucleobase metabolic process	P	0.0255613	0.000224255	7	12	over	contig15795, contig04610, contig06332, contig11700, contig04375, contig12276, contig05559	contig06549, contig11310, contig12894, contig04609, contig14713, contig10517, contig22233, contig15039, contig19374, contig20240, contig02176, contig08021
GO:0000272	polysaccharide catabolic process	P	0.0274911	0.000245345	6	8	over	contig04610, contig06332, contig11700, contig02106, contig04375, contig12276	contig11310, contig04609, contig20825, contig19374, contig03674, contig03673, contig08039, contig16596
GO:0006082	organic acid metabolic process	P	0.0294048	0.000266871	45	318	over	contig17677, contig08798, contig01921, contig08759, contig16098, contig16045, contig09881, contig16202, contig09018, contig27166, contig07600, contig12013, contig02539, contig04610, contig19542, contig08538, contig16277, contig06332, contig12548, contig18587, contig07837, contig26285, contig13827, contig11700, contig26222, contig06186, contig12307, contig05682, contig05683, contig05670, contig124…	contig14147, contig23983, contig06649, contig05115, contig18216, contig14163, contig23085, contig24130, contig18209, contig09926, contig25939, contig25986, contig07658, contig13483, contig08740, contig20503, contig08763, contig16097, contig16068, contig15733, contig09831, contig16048, contig15707, contig01994, contig06589, contig02640, contig14283, contig24906, contig24907, contig05259, contig142…
GO:0042180	cellular ketone metabolic process	P	0.0306618	0.000282918	45	321	over	contig17677, contig08798, contig01921, contig08759, contig16098, contig16045, contig09881, contig16202, contig09018, contig27166, contig07600, contig12013, contig02539, contig04610, contig19542, contig08538, contig16277, contig06332, contig12548, contig18587, contig07837, contig26285, contig13827, contig11700, contig26222, contig06186, contig12307, contig05682, contig05683, contig05670, contig124…	contig14147, contig23983, contig06649, contig05115, contig18216, contig14163, contig23085, contig24130, contig18209, contig05187, contig09926, contig25939, contig25986, contig07658, contig13483, contig08740, contig20503, contig08763, contig16097, contig16068, contig15733, contig09831, contig16048, contig15707, contig01994, contig06589, contig02640, contig14283, contig24906, contig24907, contig052…
GO:0048545	response to steroid hormone stimulus	P	0.0329968	0.00031796	10	29	over	contig17638, contig09034, contig04610, contig06332, contig11700, contig02204, contig02106, contig04375, contig12276, contig22583	contig18220, contig19802, contig17577, contig25986, contig09891, contig14251, contig14206, contig22085, contig11310, contig07575, contig01084, contig04609, contig07999, contig16294, contig09278, contig23695, contig17190, contig19374, contig09483, contig20240, contig07115, contig12402, contig14609, contig17216, contig19489, contig13299, contig18966, contig14442, contig23396
GO:0006207	'de novo' pyrimidine base biosynthetic process	P	0.0329968	0.000352106	5	5	over	contig04610, contig06332, contig11700, contig04375, contig12276	contig11310, contig04609, contig14713, contig15039, contig19374
GO:0006206	pyrimidine base metabolic process	P	0.0329968	0.000352106	5	5	over	contig04610, contig06332, contig11700, contig04375, contig12276	contig11310, contig04609, contig14713, contig15039, contig19374
GO:0019856	pyrimidine base biosynthetic process	P	0.0329968	0.000352106	5	5	over	contig04610, contig06332, contig11700, contig04375, contig12276	contig11310, contig04609, contig14713, contig15039, contig19374
GO:0043038	amino acid activation	P	0.0329968	0.000367124	14	56	over	contig08798, contig01921, contig07600, contig08538, contig18587, contig26285, contig06186, contig05682, contig05683, contig12478, contig01422, contig10869, contig27648, contig05519	contig20503, contig01994, contig05259, contig20687, contig02596, contig01095, contig01096, contig09116, contig17404, contig04673, contig20796, contig09163, contig18504, contig05040, contig05022, contig05021, contig17541, contig05080, contig20038, contig07835, contig08405, contig08455, contig10698, contig16371, contig12617, contig15299, contig15282, contig06191, contig02221, contig10029, contig213…
GO:0043039	tRNA aminoacylation	P	0.0329968	0.000367124	14	56	over	contig08798, contig01921, contig07600, contig08538, contig18587, contig26285, contig06186, contig05682, contig05683, contig12478, contig01422, contig10869, contig27648, contig05519	contig20503, contig01994, contig05259, contig20687, contig02596, contig01095, contig01096, contig09116, contig17404, contig04673, contig20796, contig09163, contig18504, contig05040, contig05022, contig05021, contig17541, contig05080, contig20038, contig07835, contig08405, contig08455, contig10698, contig16371, contig12617, contig15299, contig15282, contig06191, contig02221, contig10029, contig213…
GO:0006418	tRNA aminoacylation for protein translation	P	0.0329968	0.000367124	14	56	over	contig08798, contig01921, contig07600, contig08538, contig18587, contig26285, contig06186, contig05682, contig05683, contig12478, contig01422, contig10869, contig27648, contig05519	contig20503, contig01994, contig05259, contig20687, contig02596, contig01095, contig01096, contig09116, contig17404, contig04673, contig20796, contig09163, contig18504, contig05040, contig05022, contig05021, contig17541, contig05080, contig20038, contig07835, contig08405, contig08455, contig10698, contig16371, contig12617, contig15299, contig15282, contig06191, contig02221, contig10029, contig213…
GO:0006112	energy reserve metabolic process	P	0.0329968	0.000384322	6	9	over	contig04610, contig06332, contig11700, contig02106, contig04375, contig12276	contig11310, contig04609, contig13603, contig14031, contig12323, contig21349, contig19374, contig21264, contig04264
GO:0050880	regulation of blood vessel size	P	0.0329968	0.000384322	6	9	over	contig04610, contig06332, contig11700, contig02106, contig04375, contig12276	contig24130, contig04765, contig11310, contig04609, contig05821, contig19374, contig07147, contig21264, contig06968
GO:0035150	regulation of tube size	P	0.0329968	0.000384322	6	9	over	contig04610, contig06332, contig11700, contig02106, contig04375, contig12276	contig24130, contig04765, contig11310, contig04609, contig05821, contig19374, contig07147, contig21264, contig06968
GO:0003018	vascular process in circulatory system	P	0.0329968	0.000384322	6	9	over	contig04610, contig06332, contig11700, contig02106, contig04375, contig12276	contig24130, contig04765, contig11310, contig04609, contig05821, contig19374, contig07147, contig21264, contig06968
GO:0044275	cellular carbohydrate catabolic process	P	0.036272	0.000431337	13	50	over	contig17929, contig17677, contig04610, contig06339, contig06332, contig11700, contig02106, contig13206, contig10210, contig06884, contig02030, contig04375, contig12276	contig14168, contig19774, contig23917, contig05195, contig10355, contig08740, contig04754, contig03116, contig15689, contig11310, contig10411, contig05300, contig02583, contig09710, contig04609, contig13694, contig02416, contig15961, contig23603, contig26394, contig03474, contig07855, contig07856, contig07867, contig20050, contig27386, contig09283, contig10746, contig08374, contig19374, contig071…
GO:0055081	anion homeostasis	P	0.0372356	0.000456222	7	14	over	contig09018, contig04610, contig06332, contig11700, contig02106, contig04375, contig12276	contig19802, contig09891, contig14251, contig11310, contig04609, contig23695, contig17190, contig18755, contig19374, contig07115, contig17216, contig19489, contig13299, contig08951
GO:0050794	regulation of cellular process	P	0.0456062	0.000566192	32	706	over	contig03013, contig21805, contig17683, contig16045, contig14212, contig03151, contig07598, contig02562, contig01883, contig02515, contig12586, contig19542, contig11463, contig08594, contig18587, contig04549, contig19636, contig01263, contig08431, contig26285, contig06232, contig20166, contig18754, contig16876, contig13894, contig15182, contig04136, contig15246, contig01704, contig24089, contig154…	contig14147, contig17903, contig16105, contig14959, contig17901, contig23997, contig05130, contig04893, contig22905, contig04851, contig05125, contig05121, contig03340, contig06623, contig24130, contig09902, contig17949, contig26694, contig14111, contig17953, contig06620, contig23067, contig09924, contig03369, contig09926, contig14127, contig14129, contig09938, contig03009, contig03385, contig051…
GO:0051591	response to cAMP	P	0.0456062	0.00057799	6	10	over	contig04610, contig06332, contig11700, contig02106, contig04375, contig12276	contig11310, contig07575, contig01886, contig04609, contig27447, contig09278, contig19374, contig12402, contig18966, contig01639
GO:0010243	response to organic nitrogen	P	0.0456062	0.000579477	8	20	over	contig04610, contig06332, contig18587, contig26285, contig11700, contig02106, contig04375, contig12276	contig14959, contig19802, contig19838, contig11310, contig07575, contig04609, contig17451, contig23695, contig15299, contig11744, contig19374, contig09483, contig04140, contig14611, contig21265, contig28108, contig17216, contig02119, contig18092, contig19279
Intersection 2°C high/low PAR up-regulated
GO-ID	Term	Category	FDR	P-Value	#Test	#Ref	Over/Under	TestSeqs	RefSeqs
GO:0006730	one-carbon metabolic process	P	0.0138306	6.27617e-06	12	33	over	contig14156, contig08854, contig10466, contig06412, contig14010, contig22233, contig14652, contig03662, contig11019, contig02803, contig01639, contig08021	contig17903, contig25901, contig21728, contig27301, contig05283, contig03124, contig11348, contig08653, contig08655, contig10449, contig09037, contig07980, contig10517, contig16283, contig26374, contig20966, contig16958, contig08430, contig26289, contig01542, contig05670, contig15383, contig02995, contig14624, contig06954, contig09303, contig05792, contig09344, contig12134, contig08904, contig055…

## Sheet: Venn diagram 17°C
17°C high PAR down-regulated
GO-ID	Term	Category	FDR	P-Value	#Test	#Ref	Over/Under	TestSeqs	RefSeqs
GO:0044271	cellular nitrogen compound biosynthetic process	P	2.89985e-15	8.77279e-19	80	195	over	contig03345, contig05115, contig04863, contig14163, contig09914, contig11280, contig08754, contig01923, contig16086, contig05220, contig16202, contig06549, contig04765, contig27166, contig00420, contig11310, contig07578, contig27243, contig01894, contig04609, contig18425, contig04610, contig04628, contig07013, contig07931, contig28613, contig15995, contig06332, contig21564, contig03491, contig050…	contig23983, contig06649, contig14172, contig03340, contig23081, contig14109, contig06604, contig09928, contig09932, contig11251, contig24182, contig10359, contig17587, contig15795, contig13483, contig10312, contig08773, contig19836, contig08763, contig16098, contig16068, contig01165, contig16048, contig03291, contig09881, contig06589, contig14296, contig09018, contig14271, contig24217, contig142…
GO:0044283	small molecule biosynthetic process	P	9.1901e-10	6.95061e-13	77	245	over	contig05115, contig04863, contig14163, contig09914, contig04845, contig08759, contig16202, contig06549, contig04765, contig24221, contig27166, contig00420, contig13551, contig11310, contig11308, contig27243, contig04609, contig18425, contig04610, contig04628, contig07013, contig07931, contig27549, contig15995, contig06332, contig21564, contig05039, contig05064, contig09248, contig13724, contig078…	contig14147, contig23983, contig06649, contig14172, contig03340, contig24130, contig18209, contig14109, contig06604, contig09926, contig09928, contig09932, contig11251, contig25939, contig17677, contig24182, contig13441, contig10359, contig17587, contig15795, contig10339, contig13483, contig08740, contig10312, contig08773, contig08763, contig16098, contig16068, contig09831, contig01165, contig160…
GO:0015979	photosynthesis	P	2.25295e-08	2.04473e-11	24	26	over	contig03345, contig13485, contig01925, contig12790, contig05220, contig14092, contig07610, contig21630, contig10411, contig06470, contig25302, contig06404, contig17358, contig28613, contig03429, contig06286, contig01597, contig07215, contig05720, contig09628, contig25767, contig07393, contig08064, contig04486	contig02615, contig08847, contig13581, contig02559, contig15618, contig01861, contig03513, contig02465, contig09203, contig14054, contig01230, contig02334, contig13027, contig06100, contig14634, contig00811, contig04207, contig11073, contig04368, contig08856, contig04937, contig13305, contig15407, contig04493, contig04491, contig27896
GO:0018130	heterocycle biosynthetic process	P	2.88698e-08	3.05685e-11	27	36	over	contig03345, contig11280, contig08754, contig01923, contig16086, contig05220, contig06549, contig07578, contig01894, contig28613, contig03491, contig05064, contig09248, contig24530, contig10013, contig20187, contig14676, contig09328, contig05720, contig11052, contig25767, contig11184, contig07393, contig13364, contig04950, contig28380, contig05531	contig23081, contig19836, contig16098, contig03291, contig09881, contig14212, contig19063, contig21695, contig09043, contig07906, contig01372, contig09178, contig12539, contig10517, contig09250, contig07847, contig27373, contig01230, contig05976, contig21428, contig18633, contig06149, contig20164, contig06100, contig09411, contig05670, contig04136, contig07177, contig26910, contig27613, contig089…
GO:0044281	small molecule metabolic process	P	5.27458e-08	7.18064e-11	128	587	over	contig05115, contig04863, contig14163, contig05187, contig09914, contig04845, contig08759, contig24907, contig16202, contig04754, contig06549, contig03116, contig04765, contig24221, contig27166, contig00420, contig07600, contig13551, contig11310, contig11308, contig10411, contig27243, contig07596, contig10449, contig02583, contig04609, contig18425, contig18487, contig04610, contig04628, contig070…	contig14147, contig18249, contig17903, contig17901, contig23983, contig14156, contig14168, contig06649, contig14172, contig18216, contig03340, contig23085, contig17944, contig24130, contig18209, contig14109, contig06604, contig09926, contig09928, contig17929, contig09932, contig11251, contig08818, contig19774, contig23917, contig25939, contig07706, contig17623, contig07705, contig11227, contig259…
GO:0046483	heterocycle metabolic process	P	1.98912e-07	3.0088e-10	52	147	over	contig03345, contig09914, contig11280, contig08754, contig01923, contig16086, contig05220, contig06549, contig04765, contig11310, contig07578, contig01894, contig04609, contig04610, contig04628, contig07931, contig17393, contig28613, contig06332, contig03491, contig05039, contig05064, contig09248, contig11700, contig24530, contig10013, contig10080, contig01530, contig01529, contig20187, contig146…	contig14172, contig18216, contig03340, contig23081, contig14109, contig06604, contig09928, contig09932, contig11251, contig07706, contig07705, contig24194, contig24182, contig10359, contig15795, contig10312, contig08773, contig19836, contig16098, contig15733, contig03291, contig09881, contig05224, contig06589, contig09890, contig12715, contig14296, contig24217, contig14212, contig03286, contig076…
GO:0043170	macromolecule metabolic process	P	4.20719e-07	7.00031e-10	118	1559	over	contig04863, contig23067, contig03384, contig17682, contig07650, contig10345, contig01903, contig01906, contig13485, contig27356, contig22829, contig02662, contig06570, contig03225, contig06549, contig17842, contig08732, contig07600, contig00499, contig13551, contig11310, contig10449, contig10438, contig02562, contig18402, contig09049, contig28598, contig23788, contig15921, contig04609, contig253…	contig14955, contig14956, contig02616, contig02615, contig17900, contig17903, contig14959, contig03353, contig03351, contig14156, contig14135, contig18238, contig04885, contig05130, contig22905, contig14939, contig04851, contig18228, contig05125, contig05121, contig14176, contig02606, contig18218, contig23097, contig23089, contig23977, contig23978, contig06623, contig24130, contig04831, contig230…
GO:0044260	cellular macromolecule metabolic process	P	8.42433e-07	1.784e-09	106	1430	over	contig04863, contig23067, contig03384, contig07650, contig10345, contig01903, contig01906, contig13485, contig27356, contig22829, contig02662, contig06570, contig03225, contig06549, contig17842, contig08732, contig07600, contig00499, contig11310, contig10449, contig10438, contig02562, contig18402, contig09049, contig28598, contig15921, contig04609, contig25302, contig04610, contig06404, contig035…	contig14955, contig14956, contig02616, contig02615, contig17903, contig14959, contig03351, contig14156, contig14135, contig18238, contig04885, contig05130, contig22905, contig14939, contig04851, contig18228, contig05121, contig14176, contig02606, contig18218, contig23097, contig23089, contig23977, contig23978, contig06623, contig24130, contig04831, contig23081, contig09900, contig09902, contig179…
GO:0042180	cellular ketone metabolic process	P	1.00959e-06	2.29072e-09	76	290	over	contig05115, contig14163, contig05187, contig08759, contig24907, contig16202, contig24221, contig27166, contig00420, contig07600, contig13551, contig11310, contig11308, contig07596, contig04609, contig18425, contig18487, contig04610, contig07013, contig10553, contig27549, contig06332, contig21564, contig12520, contig03491, contig05064, contig18587, contig09248, contig13724, contig07870, contig078…	contig14147, contig23983, contig06649, contig18216, contig23085, contig24130, contig18209, contig09926, contig25939, contig17677, contig08798, contig25986, contig07658, contig13483, contig08740, contig01921, contig20503, contig08763, contig16097, contig16098, contig16068, contig15733, contig09831, contig16045, contig16048, contig15707, contig09881, contig01994, contig06589, contig02640, contig142…
GO:0043436	oxoacid metabolic process	P	2.19783e-06	5.98411e-09	74	287	over	contig05115, contig14163, contig08759, contig24907, contig16202, contig24221, contig27166, contig00420, contig07600, contig13551, contig11310, contig11308, contig07596, contig04609, contig18425, contig18487, contig04610, contig07013, contig10553, contig27549, contig06332, contig21564, contig12520, contig03491, contig05064, contig18587, contig09248, contig13724, contig07870, contig07837, contig077…	contig14147, contig23983, contig06649, contig18216, contig23085, contig24130, contig18209, contig09926, contig25939, contig17677, contig08798, contig25986, contig07658, contig13483, contig08740, contig01921, contig20503, contig08763, contig16097, contig16098, contig16068, contig15733, contig09831, contig16045, contig16048, contig15707, contig09881, contig01994, contig06589, contig02640, contig142…
GO:0019752	carboxylic acid metabolic process	P	2.19783e-06	5.98411e-09	74	287	over	contig05115, contig14163, contig08759, contig24907, contig16202, contig24221, contig27166, contig00420, contig07600, contig13551, contig11310, contig11308, contig07596, contig04609, contig18425, contig18487, contig04610, contig07013, contig10553, contig27549, contig06332, contig21564, contig12520, contig03491, contig05064, contig18587, contig09248, contig13724, contig07870, contig07837, contig077…	contig14147, contig23983, contig06649, contig18216, contig23085, contig24130, contig18209, contig09926, contig25939, contig17677, contig08798, contig25986, contig07658, contig13483, contig08740, contig01921, contig20503, contig08763, contig16097, contig16098, contig16068, contig15733, contig09831, contig16045, contig16048, contig15707, contig09881, contig01994, contig06589, contig02640, contig142…
GO:0044275	cellular carbohydrate catabolic process	P	2.35823e-06	6.97998e-09	24	39	over	contig04754, contig03116, contig11310, contig10411, contig02583, contig04609, contig04610, contig06332, contig15961, contig03474, contig07855, contig07856, contig07867, contig11700, contig25412, contig07495, contig07492, contig13206, contig02829, contig02011, contig04375, contig12276, contig06678, contig03828	contig14168, contig17929, contig19774, contig23917, contig05195, contig17677, contig10355, contig08740, contig15689, contig05300, contig09710, contig13694, contig06339, contig02416, contig23603, contig26394, contig20050, contig27386, contig09283, contig10746, contig08374, contig19374, contig07153, contig04172, contig10929, contig05759, contig02106, contig27612, contig11910, contig14337, contig102…
GO:0006082	organic acid metabolic process	P	2.35823e-06	7.13427e-09	74	289	over	contig05115, contig14163, contig08759, contig24907, contig16202, contig24221, contig27166, contig00420, contig07600, contig13551, contig11310, contig11308, contig07596, contig04609, contig18425, contig18487, contig04610, contig07013, contig10553, contig27549, contig06332, contig21564, contig12520, contig03491, contig05064, contig18587, contig09248, contig13724, contig07870, contig07837, contig077…	contig14147, contig23983, contig06649, contig18216, contig23085, contig24130, contig18209, contig09926, contig25939, contig17677, contig08798, contig25986, contig07658, contig13483, contig08740, contig01921, contig20503, contig08763, contig16097, contig16098, contig16068, contig15733, contig09831, contig16045, contig16048, contig15707, contig09881, contig01994, contig06589, contig02640, contig142…
GO:0016052	carbohydrate catabolic process	P	3.37285e-06	1.12241e-08	25	44	over	contig04754, contig03116, contig11310, contig10411, contig02583, contig04609, contig04610, contig06332, contig15961, contig03474, contig07855, contig07856, contig07867, contig11700, contig13930, contig25412, contig07495, contig07492, contig13206, contig02829, contig02011, contig04375, contig12276, contig06678, contig03828	contig14168, contig17929, contig19774, contig23917, contig05195, contig17677, contig10355, contig08740, contig15689, contig05300, contig09710, contig20825, contig13694, contig06339, contig02416, contig23603, contig26394, contig20050, contig27386, contig09283, contig10746, contig08374, contig19374, contig07153, contig03674, contig04172, contig03673, contig10929, contig05759, contig02106, contig276…
GO:0006091	generation of precursor metabolites and energy	P	7.61427e-06	2.64904e-08	47	147	over	contig13485, contig01925, contig12790, contig04754, contig03116, contig07610, contig07641, contig11310, contig21630, contig10411, contig01848, contig06470, contig04609, contig25302, contig04610, contig06404, contig04628, contig11436, contig17358, contig05857, contig15987, contig06332, contig15961, contig03474, contig07856, contig03429, contig07867, contig04574, contig11700, contig01597, contig015…	contig02615, contig14172, contig03340, contig26694, contig17929, contig11251, contig20605, contig11227, contig10355, contig10359, contig01911, contig01918, contig08740, contig10312, contig08773, contig22818, contig01195, contig12715, contig14283, contig24232, contig24217, contig14212, contig11342, contig23804, contig11390, contig26508, contig15689, contig08651, contig13581, contig11326, contig030…
GO:0033013	tetrapyrrole metabolic process	P	1.77638e-05	7.11066e-08	17	21	over	contig03345, contig11280, contig08754, contig01923, contig16086, contig05220, contig07578, contig01894, contig28613, contig03491, contig20187, contig05720, contig25767, contig15584, contig07393, contig28380, contig05531	contig18216, contig19836, contig14212, contig09043, contig07906, contig09178, contig12539, contig07847, contig27373, contig01230, contig18633, contig06100, contig04136, contig07177, contig26910, contig27613, contig08992, contig11879, contig06773, contig01602, contig04422
GO:0016053	organic acid biosynthetic process	P	2.04147e-05	9.88156e-08	39	113	over	contig05115, contig14163, contig08759, contig16202, contig27166, contig00420, contig13551, contig11308, contig18425, contig04610, contig07013, contig27549, contig06332, contig05064, contig09248, contig07837, contig06246, contig13827, contig11700, contig03789, contig20113, contig05594, contig17197, contig10013, contig09412, contig14676, contig13945, contig09328, contig09317, contig11052, contig089…	contig14147, contig23983, contig06649, contig18209, contig09926, contig25939, contig13483, contig08763, contig16098, contig16068, contig09831, contig16048, contig09881, contig06589, contig24906, contig09018, contig14271, contig17870, contig17748, contig07621, contig07615, contig12013, contig10453, contig19063, contig19961, contig08619, contig22742, contig21695, contig01063, contig12091, contig156…
GO:0046394	carboxylic acid biosynthetic process	P	2.04147e-05	9.88156e-08	39	113	over	contig05115, contig14163, contig08759, contig16202, contig27166, contig00420, contig13551, contig11308, contig18425, contig04610, contig07013, contig27549, contig06332, contig05064, contig09248, contig07837, contig06246, contig13827, contig11700, contig03789, contig20113, contig05594, contig17197, contig10013, contig09412, contig14676, contig13945, contig09328, contig09317, contig11052, contig089…	contig14147, contig23983, contig06649, contig18209, contig09926, contig25939, contig13483, contig08763, contig16098, contig16068, contig09831, contig16048, contig09881, contig06589, contig24906, contig09018, contig14271, contig17870, contig17748, contig07621, contig07615, contig12013, contig10453, contig19063, contig19961, contig08619, contig22742, contig21695, contig01063, contig12091, contig156…
GO:0055114	oxidation reduction	P	2.26699e-05	1.18052e-07	64	252	over	contig03345, contig04863, contig04836, contig05187, contig17954, contig17682, contig11280, contig00366, contig01925, contig08759, contig12790, contig16202, contig27166, contig07610, contig07641, contig21630, contig01848, contig02583, contig01873, contig25302, contig11480, contig10553, contig05863, contig05866, contig21564, contig12520, contig12524, contig12690, contig03429, contig07867, contig045…	contig02615, contig04879, contig23983, contig14168, contig02606, contig14167, contig26694, contig05189, contig03035, contig14127, contig14115, contig19774, contig20605, contig19776, contig23917, contig25939, contig11227, contig17964, contig17974, contig25165, contig18291, contig24189, contig13440, contig13415, contig17567, contig10339, contig11208, contig01911, contig01918, contig10313, contig076…
GO:0033014	tetrapyrrole biosynthetic process	P	2.26699e-05	1.20019e-07	16	19	over	contig03345, contig11280, contig08754, contig01923, contig16086, contig05220, contig07578, contig01894, contig28613, contig03491, contig20187, contig05720, contig25767, contig07393, contig28380, contig05531	contig19836, contig14212, contig09043, contig07906, contig09178, contig12539, contig07847, contig27373, contig01230, contig18633, contig06100, contig04136, contig07177, contig26910, contig27613, contig08992, contig11879, contig06773, contig01602
GO:0006778	porphyrin metabolic process	P	2.26699e-05	1.20019e-07	16	19	over	contig03345, contig08754, contig01923, contig16086, contig05220, contig07578, contig01894, contig28613, contig03491, contig20187, contig05720, contig25767, contig15584, contig07393, contig28380, contig05531	contig18216, contig19836, contig14212, contig09043, contig07906, contig09178, contig12539, contig27373, contig01230, contig18633, contig06100, contig04136, contig26910, contig27613, contig08992, contig11879, contig06773, contig01602, contig04422
GO:0009309	amine biosynthetic process	P	2.57758e-05	1.48159e-07	32	83	over	contig05115, contig14163, contig16202, contig27166, contig00420, contig27243, contig18425, contig04610, contig07013, contig06332, contig21564, contig05064, contig09248, contig07837, contig06246, contig13827, contig11700, contig20113, contig05594, contig17197, contig14676, contig09328, contig09317, contig11052, contig08991, contig07435, contig10966, contig19167, contig11184, contig13364, contig016…	contig23983, contig06649, contig17587, contig13483, contig08763, contig16098, contig16068, contig16048, contig09881, contig06589, contig09018, contig14271, contig17870, contig17748, contig07621, contig07615, contig12013, contig20655, contig10453, contig19063, contig08619, contig21695, contig01063, contig12091, contig15641, contig12076, contig06478, contig02539, contig15646, contig07999, contig195…
GO:0006779	porphyrin biosynthetic process	P	3.30078e-05	1.99715e-07	15	17	over	contig03345, contig08754, contig01923, contig16086, contig05220, contig07578, contig01894, contig28613, contig03491, contig20187, contig05720, contig25767, contig07393, contig28380, contig05531	contig19836, contig14212, contig09043, contig07906, contig09178, contig12539, contig27373, contig01230, contig18633, contig06100, contig04136, contig26910, contig27613, contig08992, contig11879, contig06773, contig01602
GO:0009064	glutamine family amino acid metabolic process	P	4.56752e-05	2.83268e-07	19	31	over	contig16202, contig27166, contig11310, contig04609, contig18425, contig04610, contig06332, contig09248, contig11700, contig17197, contig14676, contig09328, contig08991, contig10966, contig19167, contig04375, contig12276, contig11184, contig13364	contig24130, contig09018, contig11342, contig21695, contig06478, contig02539, contig15646, contig07999, contig25393, contig04698, contig04697, contig19602, contig05821, contig12548, contig09250, contig01223, contig05954, contig05953, contig12603, contig13865, contig11766, contig19374, contig21264, contig26108, contig06968, contig06972, contig02188, contig18966, contig15504, contig07327, contig055…
GO:0008652	cellular amino acid biosynthetic process	P	4.83123e-05	3.0693e-07	30	77	over	contig05115, contig14163, contig16202, contig27166, contig00420, contig18425, contig04610, contig07013, contig06332, contig05064, contig09248, contig07837, contig06246, contig13827, contig11700, contig20113, contig05594, contig17197, contig14676, contig09328, contig09317, contig11052, contig08991, contig07435, contig10966, contig19167, contig11184, contig13364, contig01639, contig04925	contig23983, contig06649, contig13483, contig08763, contig16098, contig16068, contig16048, contig09881, contig06589, contig09018, contig14271, contig17870, contig17748, contig07621, contig07615, contig12013, contig10453, contig19063, contig08619, contig21695, contig01063, contig12091, contig15641, contig12076, contig06478, contig02539, contig15646, contig07999, contig19542, contig19602, contig013…
GO:0006006	glucose metabolic process	P	4.90984e-05	3.19351e-07	25	55	over	contig04754, contig03116, contig24221, contig11310, contig10411, contig02583, contig04609, contig04610, contig06332, contig15961, contig03474, contig07855, contig07856, contig07867, contig11700, contig25412, contig07495, contig07492, contig13206, contig02829, contig02011, contig04375, contig12276, contig06678, contig03828	contig17929, contig25939, contig05195, contig17677, contig10355, contig08740, contig15689, contig22742, contig05300, contig09710, contig24341, contig13603, contig07048, contig13694, contig06339, contig02416, contig06317, contig23603, contig26394, contig05001, contig14031, contig20050, contig27386, contig01223, contig19738, contig09283, contig24566, contig06175, contig12323, contig10746, contig083…
GO:0034654	nucleobase, nucleoside, nucleotide and nucleic acid biosynthetic process	P	8.44216e-05	6.25723e-07	31	85	over	contig04863, contig09914, contig06549, contig04765, contig11310, contig04609, contig04610, contig04628, contig07931, contig06332, contig05039, contig13724, contig11700, contig23469, contig24530, contig01530, contig01529, contig23400, contig02084, contig19419, contig14609, contig01787, contig01706, contig09615, contig04375, contig12276, contig02764, contig02763, contig04950, contig06792, contig089…	contig14172, contig03340, contig14109, contig06604, contig09928, contig09932, contig11251, contig24182, contig10359, contig15795, contig10312, contig08773, contig14296, contig24217, contig03151, contig08626, contig03048, contig03060, contig12894, contig09066, contig14713, contig24300, contig03521, contig07983, contig01301, contig10517, contig16294, contig16429, contig09260, contig14035, contig137…
GO:0034404	nucleobase, nucleoside and nucleotide biosynthetic process	P	8.44216e-05	6.25723e-07	31	85	over	contig04863, contig09914, contig06549, contig04765, contig11310, contig04609, contig04610, contig04628, contig07931, contig06332, contig05039, contig13724, contig11700, contig23469, contig24530, contig01530, contig01529, contig23400, contig02084, contig19419, contig14609, contig01787, contig01706, contig09615, contig04375, contig12276, contig02764, contig02763, contig04950, contig06792, contig089…	contig14172, contig03340, contig14109, contig06604, contig09928, contig09932, contig11251, contig24182, contig10359, contig15795, contig10312, contig08773, contig14296, contig24217, contig03151, contig08626, contig03048, contig03060, contig12894, contig09066, contig14713, contig24300, contig03521, contig07983, contig01301, contig10517, contig16294, contig16429, contig09260, contig14035, contig137…
GO:0046209	nitric oxide metabolic process	P	0.000201475	1.87353e-06	8	3	over	contig11310, contig04609, contig04610, contig06332, contig04574, contig11700, contig04375, contig12276	contig12805, contig19374, contig02106
GO:0005996	monosaccharide metabolic process	P	0.000201475	1.8895e-06	28	76	over	contig04754, contig03116, contig24221, contig11310, contig10411, contig02583, contig04609, contig04610, contig07086, contig06332, contig15961, contig03474, contig07855, contig07856, contig07867, contig11700, contig10018, contig25412, contig07495, contig07492, contig13206, contig02829, contig02011, contig04375, contig12276, contig11165, contig06678, contig03828	contig17929, contig08818, contig19774, contig25939, contig05195, contig25131, contig17677, contig10355, contig13481, contig08740, contig01121, contig10457, contig15689, contig22742, contig05300, contig09710, contig24341, contig18462, contig13603, contig07048, contig13694, contig06339, contig02416, contig06317, contig22169, contig23603, contig26394, contig05001, contig14031, contig14026, contig200…
GO:0055086	nucleobase, nucleoside and nucleotide metabolic process	P	0.00023285	2.21896e-06	36	115	over	contig04863, contig09914, contig24907, contig06549, contig04765, contig11310, contig02583, contig04609, contig04610, contig04628, contig07931, contig15995, contig06332, contig05039, contig13724, contig11700, contig23469, contig24530, contig01530, contig01529, contig23400, contig02084, contig19419, contig14609, contig01787, contig01706, contig09615, contig02829, contig04375, contig12276, contig027…	contig14172, contig03340, contig14109, contig06604, contig09928, contig09932, contig11251, contig07706, contig07705, contig05195, contig24194, contig24182, contig10359, contig17567, contig15795, contig10312, contig08773, contig12715, contig14296, contig24217, contig03151, contig20722, contig08626, contig03048, contig03060, contig12894, contig09066, contig09770, contig14713, contig04651, contig243…
GO:0010467	gene expression	P	0.000327835	3.27289e-06	61	867	over	contig04863, contig23067, contig07650, contig10345, contig27356, contig22829, contig02662, contig06570, contig06549, contig08732, contig07600, contig00499, contig10449, contig10438, contig02562, contig09049, contig28598, contig03585, contig08565, contig18587, contig26375, contig27379, contig00272, contig00267, contig04070, contig12365, contig10006, contig05663, contig05683, contig26187, contig193…	contig14955, contig17903, contig03351, contig14156, contig14135, contig04885, contig05130, contig18228, contig05125, contig05121, contig18218, contig23978, contig06623, contig24130, contig09900, contig09902, contig14102, contig14111, contig04814, contig09926, contig12796, contig14129, contig09938, contig05156, contig05152, contig03013, contig17993, contig27266, contig08830, contig20609, contig241…
GO:0034201	response to oleic acid	P	0.000361254	4.31691e-06	7	2	over	contig11310, contig04609, contig04610, contig06332, contig11700, contig04375, contig12276	contig19374, contig02106
GO:0070542	response to fatty acid	P	0.000361254	4.31691e-06	7	2	over	contig11310, contig04609, contig04610, contig06332, contig11700, contig04375, contig12276	contig19374, contig02106
GO:0045909	positive regulation of vasodilation	P	0.000361254	4.31691e-06	7	2	over	contig11310, contig04609, contig04610, contig06332, contig11700, contig04375, contig12276	contig19374, contig02106
GO:0042312	regulation of vasodilation	P	0.000361254	4.31691e-06	7	2	over	contig11310, contig04609, contig04610, contig06332, contig11700, contig04375, contig12276	contig19374, contig02106
GO:0042311	vasodilation	P	0.000361254	4.31691e-06	7	2	over	contig11310, contig04609, contig04610, contig06332, contig11700, contig04375, contig12276	contig19374, contig02106
GO:0005980	glycogen catabolic process	P	0.000361254	4.31691e-06	7	2	over	contig11310, contig04609, contig04610, contig06332, contig11700, contig04375, contig12276	contig19374, contig02106
GO:0044247	cellular polysaccharide catabolic process	P	0.000361254	4.31691e-06	7	2	over	contig11310, contig04609, contig04610, contig06332, contig11700, contig04375, contig12276	contig19374, contig02106
GO:0044106	cellular amine metabolic process	P	0.000643838	8.37545e-06	49	196	over	contig05115, contig14163, contig16202, contig27166, contig00420, contig07600, contig11310, contig27243, contig04609, contig18425, contig04610, contig07013, contig17393, contig06332, contig21564, contig05064, contig18587, contig09248, contig07837, contig07779, contig06246, contig10610, contig13827, contig11700, contig20113, contig05594, contig17197, contig10080, contig05683, contig14676, contig093…	contig18249, contig23983, contig06649, contig18216, contig24130, contig08798, contig25986, contig17587, contig13483, contig01921, contig20503, contig08763, contig16098, contig16068, contig16048, contig09881, contig01994, contig06589, contig02640, contig09018, contig05259, contig14271, contig18370, contig11342, contig17870, contig17748, contig07621, contig07615, contig12013, contig25866, contig206…
GO:0019240	citrulline biosynthetic process	P	0.000654459	8.82694e-06	6	1	over	contig11310, contig04609, contig04610, contig06332, contig11700, contig12276	contig19374
GO:0000052	citrulline metabolic process	P	0.000654459	8.82694e-06	6	1	over	contig11310, contig04609, contig04610, contig06332, contig11700, contig12276	contig19374
GO:0019318	hexose metabolic process	P	0.000654459	8.90959e-06	26	74	over	contig04754, contig03116, contig24221, contig11310, contig10411, contig02583, contig04609, contig04610, contig06332, contig15961, contig03474, contig07855, contig07856, contig07867, contig11700, contig25412, contig07495, contig07492, contig13206, contig02829, contig02011, contig04375, contig12276, contig11165, contig06678, contig03828	contig17929, contig08818, contig25939, contig05195, contig25131, contig17677, contig10355, contig13481, contig08740, contig01121, contig10457, contig15689, contig22742, contig05300, contig09710, contig24341, contig18462, contig13603, contig07048, contig13694, contig06339, contig02416, contig06317, contig22169, contig23603, contig26394, contig05001, contig14031, contig14026, contig20050, contig273…
GO:0009084	glutamine family amino acid biosynthetic process	P	0.000810419	1.17683e-05	11	13	over	contig16202, contig18425, contig06332, contig09248, contig11700, contig14676, contig09328, contig08991, contig19167, contig11184, contig13364	contig09018, contig21695, contig06478, contig02539, contig15646, contig07999, contig12548, contig12603, contig19374, contig26108, contig18966, contig15504, contig05546
GO:0006207	'de novo' pyrimidine base biosynthetic process	P	0.000817753	1.30757e-05	7	3	over	contig11310, contig04609, contig04610, contig06332, contig11700, contig04375, contig12276	contig14713, contig15039, contig19374
GO:0006206	pyrimidine base metabolic process	P	0.000817753	1.30757e-05	7	3	over	contig11310, contig04609, contig04610, contig06332, contig11700, contig04375, contig12276	contig14713, contig15039, contig19374
GO:0019856	pyrimidine base biosynthetic process	P	0.000817753	1.30757e-05	7	3	over	contig11310, contig04609, contig04610, contig06332, contig11700, contig04375, contig12276	contig14713, contig15039, contig19374
GO:0019433	triglyceride catabolic process	P	0.000817753	1.30757e-05	7	3	over	contig11310, contig04609, contig04610, contig06332, contig11700, contig04375, contig12276	contig19374, contig02106, contig08947
GO:0046503	glycerolipid catabolic process	P	0.000817753	1.30757e-05	7	3	over	contig11310, contig04609, contig04610, contig06332, contig11700, contig04375, contig12276	contig19374, contig02106, contig08947
GO:0046461	neutral lipid catabolic process	P	0.000817753	1.30757e-05	7	3	over	contig11310, contig04609, contig04610, contig06332, contig11700, contig04375, contig12276	contig19374, contig02106, contig08947
GO:0044269	glycerol ether catabolic process	P	0.000817753	1.30757e-05	7	3	over	contig11310, contig04609, contig04610, contig06332, contig11700, contig04375, contig12276	contig19374, contig02106, contig08947
GO:0046464	acylglycerol catabolic process	P	0.000817753	1.30757e-05	7	3	over	contig11310, contig04609, contig04610, contig06332, contig11700, contig04375, contig12276	contig19374, contig02106, contig08947
GO:0033762	response to glucagon stimulus	P	0.000817753	1.30757e-05	7	3	over	contig11310, contig04609, contig04610, contig06332, contig11700, contig04375, contig12276	contig19374, contig09483, contig02106
GO:0015994	chlorophyll metabolic process	P	0.00102964	1.75993e-05	9	8	over	contig03345, contig05220, contig07578, contig01894, contig28613, contig05720, contig25767, contig15584, contig07393	contig18216, contig19836, contig09043, contig07906, contig09178, contig01230, contig06100, contig06773
GO:0019684	photosynthesis, light reaction	P	0.00112989	1.96547e-05	10	11	over	contig13485, contig01925, contig12790, contig06470, contig25302, contig06404, contig17358, contig03429, contig01597, contig04486	contig13581, contig02559, contig15618, contig01861, contig14054, contig13027, contig14634, contig08856, contig04493, contig04491, contig27896
GO:0009308	amine metabolic process	P	0.00117287	2.05797e-05	49	205	over	contig05115, contig14163, contig16202, contig27166, contig00420, contig07600, contig11310, contig27243, contig04609, contig18425, contig04610, contig07013, contig17393, contig06332, contig21564, contig05064, contig18587, contig09248, contig07837, contig07779, contig06246, contig10610, contig13827, contig11700, contig20113, contig05594, contig17197, contig10080, contig05683, contig14676, contig093…	contig18249, contig23983, contig06649, contig18216, contig24130, contig07717, contig25939, contig08798, contig25986, contig17587, contig13483, contig01921, contig20503, contig08763, contig16098, contig16068, contig16048, contig09881, contig01994, contig06589, contig02640, contig09018, contig05259, contig14271, contig18370, contig11342, contig17870, contig17748, contig07621, contig07615, contig120…
GO:0046164	alcohol catabolic process	P	0.00128923	2.30114e-05	17	37	over	contig04754, contig03116, contig10411, contig02583, contig15961, contig03474, contig07855, contig07856, contig07867, contig25412, contig07495, contig07492, contig13206, contig02829, contig02011, contig06678, contig03828	contig14168, contig17929, contig19774, contig23917, contig05195, contig17677, contig10355, contig08740, contig15689, contig05300, contig09710, contig13694, contig06339, contig02416, contig23603, contig26394, contig20050, contig27386, contig09283, contig10746, contig08374, contig07153, contig04172, contig10929, contig05759, contig27612, contig11910, contig14337, contig10210, contig06884, contig068…
GO:0019320	hexose catabolic process	P	0.00132308	2.4016e-05	16	33	over	contig04754, contig03116, contig10411, contig02583, contig15961, contig03474, contig07855, contig07856, contig07867, contig07495, contig07492, contig13206, contig02829, contig02011, contig06678, contig03828	contig17929, contig05195, contig17677, contig10355, contig08740, contig15689, contig05300, contig09710, contig13694, contig06339, contig02416, contig23603, contig26394, contig20050, contig27386, contig09283, contig10746, contig08374, contig07153, contig04172, contig10929, contig27612, contig11910, contig14337, contig10210, contig06884, contig06896, contig11073, contig10287, contig02030, contig043…
GO:0006007	glucose catabolic process	P	0.00132308	2.4016e-05	16	33	over	contig04754, contig03116, contig10411, contig02583, contig15961, contig03474, contig07855, contig07856, contig07867, contig07495, contig07492, contig13206, contig02829, contig02011, contig06678, contig03828	contig17929, contig05195, contig17677, contig10355, contig08740, contig15689, contig05300, contig09710, contig13694, contig06339, contig02416, contig23603, contig26394, contig20050, contig27386, contig09283, contig10746, contig08374, contig07153, contig04172, contig10929, contig27612, contig11910, contig14337, contig10210, contig06884, contig06896, contig11073, contig10287, contig02030, contig043…
GO:0046365	monosaccharide catabolic process	P	0.00173011	3.19276e-05	16	34	over	contig04754, contig03116, contig10411, contig02583, contig15961, contig03474, contig07855, contig07856, contig07867, contig07495, contig07492, contig13206, contig02829, contig02011, contig06678, contig03828	contig17929, contig19774, contig05195, contig17677, contig10355, contig08740, contig15689, contig05300, contig09710, contig13694, contig06339, contig02416, contig23603, contig26394, contig20050, contig27386, contig09283, contig10746, contig08374, contig07153, contig04172, contig10929, contig27612, contig11910, contig14337, contig10210, contig06884, contig06896, contig11073, contig10287, contig020…
GO:0033993	response to lipid	P	0.00174874	3.26796e-05	7	4	over	contig11310, contig04609, contig04610, contig06332, contig11700, contig04375, contig12276	contig19374, contig02106, contig09372, contig19279
GO:0009617	response to bacterium	P	0.00174874	3.28004e-05	15	30	over	contig03384, contig12790, contig11383, contig11310, contig27106, contig04609, contig04610, contig06332, contig06286, contig11700, contig13192, contig07481, contig04323, contig04375, contig12276	contig08847, contig19802, contig08747, contig19836, contig14251, contig24309, contig07999, contig03402, contig16369, contig23695, contig20166, contig17190, contig19374, contig09483, contig04157, contig07115, contig02106, contig17216, contig19489, contig15246, contig11927, contig04258, contig14337, contig08996, contig18008, contig06773, contig28399, contig19279, contig15494, contig09599
GO:0015992	proton transport	P	0.00227318	4.40126e-05	15	31	over	contig06570, contig04765, contig08732, contig04628, contig07294, contig01530, contig01529, contig01787, contig09615, contig02764, contig02763, contig11846, contig11897, contig08901, contig08949	contig14172, contig03340, contig09924, contig11251, contig20605, contig10359, contig10312, contig08773, contig24217, contig14227, contig03048, contig03060, contig01883, contig03521, contig07983, contig11449, contig12693, contig09260, contig14035, contig13713, contig16819, contig06980, contig01471, contig05787, contig05710, contig11967, contig16689, contig18922, contig17060, contig26770, contig049…
GO:0050880	regulation of blood vessel size	P	0.00246423	4.95851e-05	8	7	over	contig04765, contig11310, contig04609, contig04610, contig06332, contig11700, contig04375, contig12276	contig24130, contig05821, contig19374, contig07147, contig21264, contig06968, contig02106
GO:0035150	regulation of tube size	P	0.00246423	4.95851e-05	8	7	over	contig04765, contig11310, contig04609, contig04610, contig06332, contig11700, contig04375, contig12276	contig24130, contig05821, contig19374, contig07147, contig21264, contig06968, contig02106
GO:0003018	vascular process in circulatory system	P	0.00246423	4.95851e-05	8	7	over	contig04765, contig11310, contig04609, contig04610, contig06332, contig11700, contig04375, contig12276	contig24130, contig05821, contig19374, contig07147, contig21264, contig06968, contig02106
GO:0015995	chlorophyll biosynthetic process	P	0.00246423	4.95851e-05	8	7	over	contig03345, contig05220, contig07578, contig01894, contig28613, contig05720, contig25767, contig07393	contig19836, contig09043, contig07906, contig09178, contig01230, contig06100, contig06773
GO:0065007	biological regulation	P	0.00246423	4.9948e-05	76	964	over	contig05107, contig23067, contig10345, contig00366, contig11206, contig22829, contig06570, contig06549, contig04765, contig08732, contig11383, contig11310, contig07578, contig27243, contig10449, contig02562, contig09049, contig06470, contig01873, contig15921, contig04609, contig18487, contig04610, contig11436, contig08565, contig06332, contig12520, contig02445, contig18587, contig07867, contig078…	contig14955, contig14147, contig17903, contig16105, contig14959, contig17901, contig23997, contig05130, contig04893, contig22905, contig04851, contig05125, contig05121, contig14172, contig23097, contig03340, contig23089, contig17944, contig06623, contig24130, contig04831, contig23081, contig09902, contig17949, contig26694, contig14111, contig18215, contig17953, contig26675, contig06620, contig099…
GO:0006520	cellular amino acid metabolic process	P	0.00270891	5.57271e-05	44	184	over	contig05115, contig14163, contig16202, contig27166, contig00420, contig07600, contig11310, contig04609, contig18425, contig04610, contig07013, contig06332, contig05064, contig18587, contig09248, contig07837, contig07779, contig06246, contig10610, contig13827, contig11700, contig20113, contig05594, contig17197, contig10080, contig05683, contig14676, contig09328, contig09317, contig12181, contig110…	contig23983, contig06649, contig18216, contig24130, contig08798, contig25986, contig13483, contig01921, contig20503, contig08763, contig16098, contig16068, contig16048, contig09881, contig01994, contig06589, contig02640, contig09018, contig05259, contig14271, contig18370, contig11342, contig17870, contig17748, contig07621, contig07615, contig12013, contig25866, contig10453, contig20687, contig190…
GO:0006631	fatty acid metabolic process	P	0.0027151	5.6265e-05	21	59	over	contig08759, contig13551, contig11308, contig18487, contig10553, contig27549, contig12520, contig07870, contig03789, contig02201, contig09412, contig08309, contig06925, contig13945, contig00013, contig00012, contig02198, contig15511, contig08158, contig15584, contig05556	contig23085, contig18209, contig09926, contig16097, contig16045, contig15707, contig24906, contig17736, contig24296, contig23804, contig22085, contig19961, contig19963, contig04694, contig04695, contig08556, contig17335, contig02412, contig16273, contig03498, contig23623, contig01223, contig08427, contig09979, contig15838, contig04056, contig04058, contig14577, contig26222, contig06180, contig107…
GO:0006818	hydrogen transport	P	0.00280048	5.84581e-05	15	32	over	contig06570, contig04765, contig08732, contig04628, contig07294, contig01530, contig01529, contig01787, contig09615, contig02764, contig02763, contig11846, contig11897, contig08901, contig08949	contig14172, contig03340, contig09924, contig11251, contig20605, contig10359, contig10312, contig08773, contig24217, contig14227, contig03048, contig03060, contig01883, contig03521, contig07983, contig11449, contig12693, contig09260, contig14035, contig13713, contig08374, contig16819, contig06980, contig01471, contig05787, contig05710, contig11967, contig16689, contig18922, contig17060, contig267…
GO:0009251	glucan catabolic process	P	0.00336643	7.12902e-05	7	5	over	contig11310, contig04609, contig04610, contig06332, contig11700, contig04375, contig12276	contig19374, contig03674, contig03673, contig02106, contig16596
GO:0006561	proline biosynthetic process	P	0.00338491	7.21937e-05	5	1	over	contig09248, contig14676, contig09328, contig11184, contig13364	contig21695
GO:0005975	carbohydrate metabolic process	P	0.00347776	7.53101e-05	45	192	over	contig03345, contig01106, contig04754, contig03116, contig24221, contig11310, contig10411, contig02583, contig12867, contig04609, contig04610, contig07086, contig05857, contig06332, contig15961, contig02443, contig14783, contig03474, contig07855, contig07856, contig07867, contig06286, contig11700, contig07205, contig10018, contig04127, contig08312, contig13930, contig07187, contig22314, contig254…	contig02616, contig14168, contig23097, contig06643, contig17929, contig09936, contig08818, contig19774, contig23917, contig25939, contig17623, contig08833, contig05195, contig25131, contig25912, contig08847, contig18292, contig17677, contig13441, contig10355, contig13481, contig00371, contig13469, contig08740, contig01121, contig09863, contig21796, contig03294, contig16053, contig09895, contig098…
GO:0042493	response to drug	P	0.00353568	7.75486e-05	19	51	over	contig08754, contig22829, contig04765, contig11310, contig04609, contig18487, contig04610, contig06332, contig07870, contig11700, contig12365, contig08309, contig18876, contig15511, contig08158, contig09615, contig04375, contig12276, contig01639	contig04851, contig18220, contig14109, contig09924, contig09926, contig17638, contig19802, contig17577, contig16068, contig12733, contig09891, contig14251, contig18318, contig14206, contig13501, contig07575, contig09034, contig07999, contig19542, contig16294, contig17553, contig27447, contig09276, contig23695, contig12662, contig05664, contig10757, contig17190, contig19374, contig09483, contig107…
GO:0051591	response to cAMP	P	0.00403189	9.00367e-05	8	8	over	contig11310, contig04609, contig04610, contig06332, contig11700, contig04375, contig12276, contig01639	contig07575, contig01886, contig27447, contig09278, contig19374, contig12402, contig02106, contig18966
GO:0006096	glycolysis	P	0.00487152	0.000110532	13	26	over	contig04754, contig03116, contig10411, contig15961, contig03474, contig07856, contig07867, contig07495, contig07492, contig13206, contig02011, contig06678, contig03828	contig17929, contig10355, contig08740, contig15689, contig05300, contig09710, contig06339, contig02416, contig23603, contig26394, contig20050, contig10746, contig07153, contig04172, contig10929, contig27612, contig11910, contig14337, contig10210, contig06884, contig06896, contig11073, contig10287, contig02030, contig04368, contig04489
GO:0051707	response to other organism	P	0.00524772	0.000119862	23	72	over	contig09914, contig03384, contig01920, contig12790, contig11383, contig11310, contig27106, contig04609, contig04610, contig06332, contig04574, contig06286, contig06246, contig11700, contig05653, contig13192, contig18876, contig12109, contig07481, contig04323, contig04375, contig12276, contig09563	contig18250, contig23097, contig26675, contig08840, contig08847, contig19802, contig08747, contig20512, contig19836, contig14251, contig12801, contig12802, contig12800, contig13552, contig13549, contig16199, contig06442, contig09124, contig24309, contig07999, contig14795, contig22216, contig14028, contig06301, contig03402, contig14857, contig16369, contig18600, contig09285, contig23695, contig152…
GO:0042594	response to starvation	P	0.00527452	0.000122891	10	15	over	contig11310, contig04609, contig04610, contig06332, contig11700, contig07205, contig04375, contig12276, contig12223, contig04494	contig15748, contig25013, contig22085, contig10516, contig19738, contig13027, contig19374, contig03707, contig21265, contig06954, contig02106, contig18807, contig24742, contig28267, contig18092
GO:0044262	cellular carbohydrate metabolic process	P	0.00527452	0.000123813	35	138	over	contig04754, contig03116, contig24221, contig11310, contig10411, contig02583, contig04609, contig04610, contig07086, contig05857, contig06332, contig15961, contig14783, contig03474, contig07855, contig07856, contig07867, contig06286, contig11700, contig07205, contig10018, contig07187, contig22314, contig25412, contig07495, contig07492, contig13206, contig15507, contig02829, contig02011, contig043…	contig02616, contig14168, contig23097, contig17929, contig08818, contig19774, contig23917, contig25939, contig17623, contig05195, contig25131, contig18292, contig17677, contig13441, contig10355, contig13481, contig08740, contig01121, contig09863, contig21796, contig03294, contig16053, contig14283, contig10457, contig15689, contig12812, contig21621, contig08626, contig22742, contig05300, contig097…
GO:0007275	multicellular organismal development	P	0.00549489	0.000132157	35	532	over	contig04863, contig09910, contig23067, contig10345, contig22829, contig11383, contig09049, contig15921, contig18487, contig08565, contig12520, contig18587, contig17465, contig05932, contig23469, contig13074, contig09401, contig09412, contig23400, contig15349, contig02084, contig11647, contig02198, contig12181, contig07481, contig01787, contig07408, contig12113, contig15511, contig04323, contig043…	contig14955, contig14147, contig14148, contig17901, contig05125, contig23097, contig03340, contig18220, contig06622, contig04831, contig09902, contig18215, contig06620, contig09924, contig09926, contig09928, contig25939, contig24164, contig07700, contig11230, contig11227, contig25901, contig17616, contig24141, contig07757, contig07732, contig19807, contig10370, contig13426, contig13415, contig205…
GO:0006641	triglyceride metabolic process	P	0.00574032	0.000140421	7	6	over	contig11310, contig04609, contig04610, contig06332, contig11700, contig04375, contig12276	contig12037, contig14801, contig14055, contig19374, contig02106, contig08947
GO:0005977	glycogen metabolic process	P	0.00574032	0.000140421	7	6	over	contig11310, contig04609, contig04610, contig06332, contig11700, contig04375, contig12276	contig13603, contig14031, contig12323, contig19374, contig02106, contig04264
GO:0009165	nucleotide biosynthetic process	P	0.00577195	0.000142312	24	79	over	contig04863, contig09914, contig06549, contig04765, contig04628, contig07931, contig05039, contig13724, contig11700, contig23469, contig01530, contig01529, contig23400, contig02084, contig19419, contig14609, contig01787, contig01706, contig09615, contig02764, contig02763, contig04950, contig06792, contig08949	contig14172, contig03340, contig14109, contig06604, contig09928, contig09932, contig11251, contig24182, contig10359, contig15795, contig10312, contig08773, contig14296, contig24217, contig03151, contig08626, contig03048, contig03060, contig12894, contig09066, contig14713, contig24300, contig03521, contig07983, contig01301, contig16294, contig16429, contig09260, contig14035, contig13713, contig274…
GO:0046112	nucleobase biosynthetic process	P	0.00618732	0.000154426	8	9	over	contig06549, contig11310, contig04609, contig04610, contig06332, contig11700, contig04375, contig12276	contig15795, contig12894, contig14713, contig10517, contig15039, contig19374, contig02176, contig05559, contig08021
GO:0044267	cellular protein metabolic process	P	0.00714395	0.000185426	72	898	over	contig03384, contig07650, contig10345, contig13485, contig27356, contig22829, contig02662, contig06570, contig03225, contig17842, contig08732, contig07600, contig00499, contig11310, contig10438, contig02562, contig18402, contig28598, contig15921, contig04609, contig25302, contig06404, contig10531, contig10599, contig17358, contig06332, contig14783, contig12676, contig18587, contig11588, contig002…	contig14955, contig02615, contig17903, contig14959, contig03351, contig14135, contig18238, contig05130, contig22905, contig14939, contig04851, contig14176, contig18218, contig04831, contig23081, contig17949, contig14102, contig14111, contig17953, contig23074, contig17957, contig06620, contig04814, contig09924, contig23063, contig09926, contig14129, contig09938, contig03385, contig05156, contig033…
GO:0006519	cellular amino acid and derivative metabolic process	P	0.00721038	0.000188685	48	219	over	contig05115, contig14163, contig16202, contig27166, contig00420, contig07600, contig11310, contig27243, contig04609, contig18425, contig04610, contig07013, contig06332, contig21564, contig05064, contig18587, contig09248, contig07837, contig07779, contig06246, contig10610, contig13827, contig11700, contig20113, contig05594, contig17197, contig10080, contig05683, contig14676, contig09328, contig093…	contig18249, contig23983, contig06649, contig18216, contig24130, contig11227, contig08798, contig25986, contig07658, contig17587, contig13483, contig01921, contig20503, contig08763, contig16098, contig16068, contig16048, contig09881, contig01994, contig06589, contig02640, contig09018, contig05259, contig14271, contig18370, contig04773, contig09816, contig11342, contig17870, contig17748, contig076…
GO:0031667	response to nutrient levels	P	0.00742028	0.000196422	13	28	over	contig11206, contig11310, contig04609, contig18487, contig04610, contig06332, contig11700, contig07205, contig15511, contig04375, contig12276, contig12223, contig04494	contig23074, contig16063, contig12733, contig15748, contig25013, contig22085, contig07999, contig10516, contig23605, contig19738, contig09278, contig13027, contig19374, contig03707, contig09483, contig15365, contig21265, contig06954, contig02106, contig19440, contig18807, contig10213, contig18966, contig24742, contig16645, contig28267, contig18092, contig13383
GO:0019538	protein metabolic process	P	0.00800471	0.000215525	84	1010	over	contig03384, contig17682, contig07650, contig10345, contig13485, contig27356, contig22829, contig02662, contig06570, contig03225, contig17842, contig08732, contig07600, contig00499, contig13551, contig11310, contig10438, contig02562, contig18402, contig28598, contig23788, contig15921, contig04609, contig25302, contig06404, contig10531, contig10599, contig17358, contig08565, contig06332, contig147…	contig14955, contig02615, contig17903, contig14959, contig03353, contig03351, contig14135, contig18238, contig05130, contig22905, contig14939, contig04851, contig05125, contig14176, contig18218, contig04831, contig23081, contig17949, contig14102, contig14111, contig17953, contig23074, contig17957, contig06620, contig04814, contig09924, contig23063, contig09926, contig14129, contig17937, contig099…
GO:0000272	polysaccharide catabolic process	P	0.00912501	0.000255351	7	7	over	contig11310, contig04609, contig04610, contig06332, contig11700, contig04375, contig12276	contig20825, contig19374, contig03674, contig03673, contig02106, contig08039, contig16596
GO:0051186	cofactor metabolic process	P	0.00919135	0.000258598	30	114	over	contig03345, contig08754, contig01923, contig16086, contig05220, contig24907, contig07578, contig02583, contig01894, contig05857, contig28613, contig15995, contig03491, contig13724, contig07870, contig10013, contig08309, contig20187, contig13182, contig05720, contig14399, contig15511, contig08158, contig02829, contig25767, contig15584, contig04352, contig07393, contig28380, contig05531	contig18216, contig24130, contig23081, contig09926, contig05165, contig20605, contig11227, contig05195, contig17567, contig07658, contig19836, contig15733, contig03291, contig09890, contig01195, contig14283, contig04773, contig14212, contig11342, contig20722, contig25866, contig08655, contig08651, contig01825, contig22022, contig01084, contig09066, contig09770, contig09043, contig07906, contig046…
GO:0032787	monocarboxylic acid metabolic process	P	0.0109684	0.000311913	27	99	over	contig08759, contig24221, contig13551, contig11308, contig18487, contig10553, contig27549, contig21564, contig12520, contig07870, contig07837, contig03789, contig10013, contig10018, contig02201, contig09412, contig08309, contig06925, contig13945, contig00013, contig00012, contig02198, contig15511, contig08158, contig15584, contig05556, contig06678	contig14147, contig23085, contig18209, contig09926, contig25939, contig17677, contig07658, contig08740, contig16097, contig15733, contig09831, contig16045, contig15707, contig14283, contig24906, contig17736, contig11342, contig24296, contig23804, contig22085, contig08655, contig19961, contig19963, contig22742, contig22022, contig01084, contig04694, contig04695, contig04698, contig04697, contig070…
GO:0044255	cellular lipid metabolic process	P	0.0133217	0.000386895	36	153	over	contig08759, contig13551, contig11310, contig11308, contig04609, contig12561, contig18487, contig04610, contig11480, contig10553, contig27549, contig06332, contig12520, contig14783, contig07870, contig05942, contig02313, contig11700, contig03789, contig10018, contig02201, contig09412, contig08309, contig06925, contig06006, contig13945, contig00013, contig00012, contig02198, contig15511, contig081…	contig14147, contig18249, contig23085, contig17944, contig18209, contig09926, contig24164, contig18264, contig13441, contig07689, contig07692, contig16097, contig09831, contig16045, contig21796, contig15707, contig12713, contig16203, contig23842, contig24906, contig18328, contig17736, contig24296, contig23804, contig11392, contig18383, contig22085, contig20655, contig19961, contig19963, contig128…
GO:0009112	nucleobase metabolic process	P	0.013495	0.000396011	8	11	over	contig06549, contig11310, contig04609, contig04610, contig06332, contig11700, contig04375, contig12276	contig15795, contig12894, contig14713, contig10517, contig22233, contig15039, contig19374, contig20240, contig02176, contig05559, contig08021
GO:0014075	response to amine stimulus	P	0.013495	0.000396011	8	11	over	contig11310, contig04609, contig04610, contig06332, contig18587, contig11700, contig04375, contig12276	contig14959, contig19838, contig26285, contig15299, contig11744, contig19374, contig09483, contig21265, contig02106, contig28108, contig18092
GO:0044249	cellular biosynthetic process	P	0.0143661	0.000428092	162	1054	over	contig03345, contig05115, contig04863, contig14163, contig05187, contig09914, contig04845, contig23067, contig11280, contig07650, contig10345, contig01903, contig01906, contig08754, contig01923, contig27356, contig16086, contig08759, contig02662, contig05220, contig06570, contig24907, contig16202, contig06549, contig04765, contig24221, contig27166, contig08732, contig00420, contig07600, contig004…	contig14147, contig02616, contig18249, contig23983, contig03351, contig14135, contig05130, contig06649, contig18228, contig05121, contig14172, contig18218, contig23097, contig03340, contig23089, contig06623, contig24130, contig23081, contig18209, contig09902, contig14109, contig14102, contig14111, contig06604, contig04814, contig09926, contig09928, contig14129, contig05165, contig09932, contig099…
GO:0006638	neutral lipid metabolic process	P	0.0143856	0.000435397	7	8	over	contig11310, contig04609, contig04610, contig06332, contig11700, contig04375, contig12276	contig12037, contig14801, contig14055, contig19374, contig03669, contig02106, contig06707, contig08947
GO:0006639	acylglycerol metabolic process	P	0.0143856	0.000435397	7	8	over	contig11310, contig04609, contig04610, contig06332, contig11700, contig04375, contig12276	contig12037, contig14801, contig14055, contig19374, contig03669, contig02106, contig06707, contig08947
GO:0006112	energy reserve metabolic process	P	0.0143856	0.000435397	7	8	over	contig11310, contig04609, contig04610, contig06332, contig11700, contig04375, contig12276	contig13603, contig14031, contig12323, contig21349, contig19374, contig21264, contig02106, contig04264
GO:0009058	biosynthetic process	P	0.0146275	0.000449156	170	1121	over	contig03345, contig05115, contig04863, contig14163, contig05187, contig09914, contig04845, contig23067, contig11280, contig07650, contig10345, contig01903, contig01906, contig08754, contig01923, contig27356, contig16086, contig01106, contig08759, contig02662, contig05220, contig06570, contig24907, contig16202, contig06549, contig04765, contig24221, contig27166, contig08732, contig00420, contig076…	contig14147, contig02616, contig18249, contig17901, contig03001, contig23983, contig03351, contig05146, contig14135, contig05130, contig06649, contig18228, contig05121, contig14172, contig18218, contig23097, contig03340, contig23089, contig06623, contig24130, contig23081, contig18209, contig09902, contig14109, contig14102, contig14111, contig03393, contig06604, contig04814, contig09926, contig099…
GO:0008015	blood circulation	P	0.0152823	0.000478511	9	15	over	contig04765, contig11310, contig04609, contig04610, contig06332, contig11700, contig05663, contig04375, contig12276	contig24130, contig18215, contig09846, contig24911, contig05821, contig19659, contig16976, contig12331, contig19374, contig07147, contig21264, contig06968, contig02106, contig04264, contig18141
GO:0003013	circulatory system process	P	0.0152823	0.000478511	9	15	over	contig04765, contig11310, contig04609, contig04610, contig06332, contig11700, contig05663, contig04375, contig12276	contig24130, contig18215, contig09846, contig24911, contig05821, contig19659, contig16976, contig12331, contig19374, contig07147, contig21264, contig06968, contig02106, contig04264, contig18141
GO:0009117	nucleotide metabolic process	P	0.0159294	0.000503592	28	107	over	contig04863, contig09914, contig24907, contig06549, contig04765, contig02583, contig04628, contig07931, contig15995, contig05039, contig13724, contig11700, contig23469, contig01530, contig01529, contig23400, contig02084, contig19419, contig14609, contig01787, contig01706, contig09615, contig02829, contig02764, contig02763, contig04950, contig06792, contig08949	contig14172, contig03340, contig14109, contig06604, contig09928, contig09932, contig11251, contig07706, contig07705, contig05195, contig24194, contig24182, contig10359, contig17567, contig15795, contig10312, contig08773, contig12715, contig14296, contig24217, contig03151, contig20722, contig08626, contig03048, contig03060, contig12894, contig09066, contig09770, contig14713, contig04651, contig243…
GO:0006753	nucleoside phosphate metabolic process	P	0.0159294	0.000503592	28	107	over	contig04863, contig09914, contig24907, contig06549, contig04765, contig02583, contig04628, contig07931, contig15995, contig05039, contig13724, contig11700, contig23469, contig01530, contig01529, contig23400, contig02084, contig19419, contig14609, contig01787, contig01706, contig09615, contig02829, contig02764, contig02763, contig04950, contig06792, contig08949	contig14172, contig03340, contig14109, contig06604, contig09928, contig09932, contig11251, contig07706, contig07705, contig05195, contig24194, contig24182, contig10359, contig17567, contig15795, contig10312, contig08773, contig12715, contig14296, contig24217, contig03151, contig20722, contig08626, contig03048, contig03060, contig12894, contig09066, contig09770, contig14713, contig04651, contig243…
GO:0042398	cellular amino acid derivative biosynthetic process	P	0.0160175	0.000508801	10	19	over	contig11310, contig27243, contig04609, contig04610, contig06332, contig21564, contig05064, contig11700, contig12276, contig01639	contig24130, contig17587, contig16098, contig09881, contig09816, contig20655, contig05821, contig13865, contig14505, contig07224, contig05670, contig19374, contig21264, contig06968, contig04260, contig14360, contig12292, contig21024, contig09547
GO:0050789	regulation of biological process	P	0.0169909	0.000555141	69	844	over	contig05107, contig23067, contig10345, contig00366, contig11206, contig22829, contig06570, contig06549, contig04765, contig08732, contig11383, contig11310, contig27243, contig10449, contig02562, contig09049, contig06470, contig01873, contig15921, contig04609, contig18487, contig04610, contig11436, contig08565, contig06332, contig12520, contig02445, contig18587, contig07867, contig07870, contig209…	contig14955, contig14147, contig17903, contig16105, contig14959, contig17901, contig23997, contig05130, contig04893, contig22905, contig04851, contig05125, contig05121, contig23097, contig03340, contig06623, contig24130, contig04831, contig23081, contig09902, contig17949, contig26694, contig14111, contig18215, contig17953, contig26675, contig06620, contig09924, contig03369, contig09926, contig099…
GO:0006560	proline metabolic process	P	0.0170247	0.000561395	5	3	over	contig09248, contig14676, contig09328, contig11184, contig13364	contig21695, contig05954, contig05953
GO:0009765	photosynthesis, light harvesting	P	0.0170247	0.000561395	5	3	over	contig13485, contig06404, contig17358, contig01597, contig04486	contig14634, contig04493, contig04491
GO:0006066	alcohol metabolic process	P	0.0174876	0.000581949	31	128	over	contig04754, contig03116, contig24221, contig11310, contig10411, contig27243, contig02583, contig04609, contig04610, contig07086, contig06332, contig15961, contig03474, contig07855, contig07856, contig07867, contig11700, contig10018, contig25412, contig00513, contig07495, contig07492, contig13206, contig15507, contig02829, contig02011, contig04375, contig12276, contig11165, contig06678, contig038…	contig18249, contig17901, contig14168, contig09926, contig17929, contig08818, contig19774, contig23917, contig25939, contig17623, contig17616, contig05195, contig25131, contig17677, contig18264, contig13441, contig10355, contig13481, contig01914, contig08740, contig01121, contig21796, contig23870, contig11392, contig12031, contig20655, contig10457, contig15689, contig19961, contig22005, contig227…
GO:0044282	small molecule catabolic process	P	0.018166	0.000607273	25	92	over	contig04754, contig03116, contig04765, contig10411, contig02583, contig10553, contig06332, contig15961, contig03474, contig07855, contig07856, contig07867, contig07779, contig10610, contig11700, contig10080, contig00012, contig25412, contig07495, contig07492, contig13206, contig02829, contig02011, contig06678, contig03828	contig14168, contig18216, contig03340, contig17929, contig19774, contig23917, contig05195, contig17677, contig24194, contig24182, contig10355, contig25986, contig08740, contig16097, contig15707, contig02640, contig18370, contig22085, contig15689, contig19963, contig12881, contig05300, contig09710, contig28597, contig04651, contig11463, contig25387, contig13694, contig08556, contig06339, contig063…
GO:0050794	regulation of cellular process	P	0.0187773	0.000630551	53	685	over	contig23067, contig10345, contig00366, contig11206, contig22829, contig06570, contig06549, contig04765, contig08732, contig10449, contig02562, contig09049, contig06470, contig01873, contig15921, contig18487, contig11436, contig08565, contig12520, contig02445, contig18587, contig07867, contig07870, contig20933, contig12365, contig05663, contig02201, contig09412, contig19345, contig08309, contig193…	contig14147, contig17903, contig16105, contig14959, contig17901, contig23997, contig05130, contig04893, contig22905, contig04851, contig05125, contig05121, contig03340, contig06623, contig24130, contig09902, contig17949, contig26694, contig14111, contig17953, contig06620, contig09924, contig03369, contig09926, contig14127, contig14129, contig09938, contig03009, contig03385, contig05156, contig033…
GO:0009991	response to extracellular stimulus	P	0.0203577	0.000689779	13	33	over	contig11206, contig11310, contig04609, contig18487, contig04610, contig06332, contig11700, contig07205, contig15511, contig04375, contig12276, contig12223, contig04494	contig23074, contig16063, contig12733, contig15748, contig25013, contig22085, contig07999, contig10516, contig23605, contig19738, contig09278, contig13027, contig19374, contig03707, contig09483, contig15365, contig20240, contig21265, contig06954, contig02106, contig19440, contig09306, contig18807, contig10213, contig18966, contig18958, contig24742, contig16645, contig28267, contig18092, contig155…
GO:0051384	response to glucocorticoid stimulus	P	0.0205938	0.00070401	7	9	over	contig11310, contig04609, contig04610, contig06332, contig11700, contig04375, contig12276	contig17638, contig25986, contig22085, contig07999, contig09278, contig19374, contig09483, contig02106, contig18966
GO:0031960	response to corticosteroid stimulus	P	0.0205938	0.00070401	7	9	over	contig11310, contig04609, contig04610, contig06332, contig11700, contig04375, contig12276	contig17638, contig25986, contig22085, contig07999, contig09278, contig19374, contig09483, contig02106, contig18966
GO:0006541	glutamine metabolic process	P	0.0248583	0.000879874	8	13	over	contig16202, contig11310, contig04609, contig04610, contig06332, contig11700, contig04375, contig12276	contig06478, contig02539, contig15646, contig25393, contig12548, contig09250, contig01223, contig11766, contig19374, contig26108, contig18966, contig07327, contig05546
GO:0034220	ion transmembrane transport	P	0.0269785	0.000991648	12	30	over	contig06570, contig04765, contig08732, contig04628, contig01530, contig01529, contig01787, contig09615, contig02764, contig02763, contig11897, contig08949	contig14172, contig03340, contig09924, contig11251, contig13431, contig10359, contig10312, contig08773, contig24217, contig14227, contig03048, contig03060, contig01883, contig03521, contig07983, contig09260, contig13713, contig21338, contig06980, contig01471, contig08263, contig05787, contig05710, contig11967, contig16689, contig18922, contig17060, contig26770, contig04919, contig19279
GO:0018904	organic ether metabolic process	P	0.0290223	0.00108872	7	10	over	contig11310, contig04609, contig04610, contig06332, contig11700, contig04375, contig12276	contig12037, contig11406, contig14801, contig14055, contig19374, contig03669, contig02106, contig02844, contig06707, contig08947
GO:0006662	glycerol ether metabolic process	P	0.0290223	0.00108872	7	10	over	contig11310, contig04609, contig04610, contig06332, contig11700, contig04375, contig12276	contig12037, contig11406, contig14801, contig14055, contig19374, contig03669, contig02106, contig02844, contig06707, contig08947
GO:0018298	protein-chromophore linkage	P	0.0300888	0.0011534	5	4	over	contig13485, contig06404, contig17358, contig01597, contig04486	contig02615, contig02559, contig04493, contig04491
GO:0043101	purine salvage	P	0.0306664	0.00118751	3	0	over	contig06549, contig24530, contig04950
GO:0008152	metabolic process	P	0.0313967	0.00122053	323	2425	over	contig03345, contig02620, contig03360, contig05115, contig04863, contig14163, contig04836, contig05187, contig17954, contig09914, contig04845, contig03032, contig23067, contig03372, contig03384, contig17682, contig11280, contig07673, contig07650, contig10345, contig01903, contig00366, contig01906, contig13485, contig08754, contig08769, contig01925, contig01923, contig27356, contig16086, contig019…	contig14955, contig14956, contig14147, contig02616, contig02615, contig17900, contig18249, contig17903, contig14959, contig17901, contig04879, contig03001, contig03353, contig23983, contig03351, contig05146, contig14156, contig14135, contig02628, contig18238, contig04885, contig06659, contig05130, contig22905, contig14168, contig04859, contig06649, contig14939, contig04851, contig18228, contig051…
GO:0042440	pigment metabolic process	P	0.0385853	0.00155252	12	32	over	contig03345, contig08754, contig05220, contig06549, contig07578, contig01894, contig28613, contig03491, contig09412, contig05720, contig25767, contig07393	contig18216, contig15795, contig19836, contig14212, contig12894, contig09043, contig07906, contig09178, contig12539, contig10517, contig03489, contig05036, contig05037, contig01230, contig03728, contig14505, contig06100, contig25598, contig05670, contig22406, contig04136, contig26910, contig02176, contig04260, contig14360, contig01731, contig06773, contig05559, contig09547, contig01602, contig080…
GO:0006537	glutamate biosynthetic process	P	0.0388836	0.00157628	4	2	over	contig16202, contig18425, contig08991, contig19167	contig12548, contig12603
GO:0046777	protein amino acid autophosphorylation	P	0.0417071	0.00171598	9	19	over	contig06570, contig08732, contig11310, contig15921, contig04609, contig06332, contig05663, contig04375, contig11897	contig09846, contig14227, contig12801, contig06488, contig16199, contig01883, contig00151, contig16976, contig13037, contig21265, contig05787, contig11927, contig04264, contig10213, contig13235, contig21946, contig12137, contig07446, contig18092
GO:0044242	cellular lipid catabolic process	P	0.0417071	0.00171598	9	19	over	contig11310, contig04609, contig04610, contig10553, contig06332, contig11700, contig00012, contig04375, contig12276	contig16097, contig15707, contig22085, contig19963, contig16138, contig16273, contig14577, contig09423, contig19374, contig13959, contig17308, contig00014, contig01497, contig13903, contig02106, contig17236, contig12974, contig13348, contig08947
GO:0044057	regulation of system process	P	0.0422376	0.00175058	8	15	over	contig04765, contig11310, contig04609, contig04610, contig06332, contig11700, contig04375, contig12276	contig18215, contig09928, contig19838, contig09784, contig14031, contig19659, contig12331, contig19374, contig09483, contig12416, contig02106, contig13292, contig27907, contig09603, contig17060
Intersection 17°C high/low PAR down-regulated
GO-ID	Term	Category	FDR	P-Value	#Test	#Ref	Over/Under	TestSeqs	RefSeqs
GO:0006091	generation of precursor metabolites and energy	P	0.000113626	1.54686e-07	27	167	over	contig17929, contig20605, contig08740, contig08773, contig03048, contig02559, contig08508, contig02465, contig26394, contig09260, contig01223, contig22960, contig24566, contig10746, contig04172, contig01471, contig05710, contig11967, contig06884, contig11073, contig16689, contig02030, contig04368, contig04493, contig04491, contig04489, contig27896	contig02615, contig14172, contig03340, contig26694, contig11251, contig11227, contig10355, contig10359, contig13485, contig01911, contig01918, contig10312, contig01925, contig12790, contig22818, contig01195, contig12715, contig14283, contig04754, contig03116, contig24232, contig24217, contig14212, contig11342, contig23804, contig11390, contig26508, contig07610, contig07641, contig15689, contig113…
GO:0015979	photosynthesis	P	0.000973218	1.76654e-06	12	38	over	contig08847, contig02559, contig02465, contig02334, contig06100, contig00811, contig11073, contig04368, contig04937, contig04493, contig04491, contig27896	contig02615, contig03345, contig13485, contig01925, contig12790, contig05220, contig14092, contig07610, contig21630, contig13581, contig10411, contig15618, contig01861, contig06470, contig25302, contig06404, contig03513, contig17358, contig28613, contig09203, contig14054, contig03429, contig06286, contig01230, contig13027, contig01597, contig07215, contig14634, contig04207, contig05720, contig096…
GO:0071704	organic substance metabolic process	P	0.00172567	3.91545e-06	5	2	over	contig08847, contig02334, contig11073, contig04368, contig04937	contig10411, contig06286
GO:0015977	carbon fixation	P	0.00172567	3.91545e-06	5	2	over	contig08847, contig02334, contig11073, contig04368, contig04937	contig10411, contig06286
GO:0019253	reductive pentose-phosphate cycle	P	0.00172567	3.91545e-06	5	2	over	contig08847, contig02334, contig11073, contig04368, contig04937	contig10411, contig06286
GO:0006096	glycolysis	P	0.00243339	6.99357e-06	10	29	over	contig17929, contig08740, contig26394, contig10746, contig04172, contig06884, contig11073, contig02030, contig04368, contig04489	contig10355, contig04754, contig03116, contig15689, contig10411, contig05300, contig09710, contig06339, contig02416, contig15961, contig23603, contig03474, contig07856, contig07867, contig20050, contig07153, contig10929, contig27612, contig11910, contig07495, contig07492, contig14337, contig13206, contig10210, contig06896, contig10287, contig02011, contig06678, contig03828
GO:0019320	hexose catabolic process	P	0.00279466	9.72276e-06	11	38	over	contig17929, contig17677, contig08740, contig26394, contig10746, contig04172, contig06884, contig11073, contig02030, contig04368, contig04489	contig05195, contig10355, contig04754, contig03116, contig15689, contig10411, contig05300, contig02583, contig09710, contig13694, contig06339, contig02416, contig15961, contig23603, contig03474, contig07855, contig07856, contig07867, contig20050, contig27386, contig09283, contig08374, contig07153, contig10929, contig27612, contig11910, contig07495, contig07492, contig14337, contig13206, contig102…
GO:0006007	glucose catabolic process	P	0.00279466	9.72276e-06	11	38	over	contig17929, contig17677, contig08740, contig26394, contig10746, contig04172, contig06884, contig11073, contig02030, contig04368, contig04489	contig05195, contig10355, contig04754, contig03116, contig15689, contig10411, contig05300, contig02583, contig09710, contig13694, contig06339, contig02416, contig15961, contig23603, contig03474, contig07855, contig07856, contig07867, contig20050, contig27386, contig09283, contig08374, contig07153, contig10929, contig27612, contig11910, contig07495, contig07492, contig14337, contig13206, contig102…
GO:0006094	gluconeogenesis	P	0.00316451	1.18499e-05	6	7	over	contig08740, contig24566, contig06175, contig10746, contig04172, contig11073	contig24221, contig05001, contig20050, contig10929, contig06678, contig01637, contig04483
GO:0046365	monosaccharide catabolic process	P	0.00316451	1.19668e-05	11	39	over	contig17929, contig17677, contig08740, contig26394, contig10746, contig04172, contig06884, contig11073, contig02030, contig04368, contig04489	contig19774, contig05195, contig10355, contig04754, contig03116, contig15689, contig10411, contig05300, contig02583, contig09710, contig13694, contig06339, contig02416, contig15961, contig23603, contig03474, contig07855, contig07856, contig07867, contig20050, contig27386, contig09283, contig08374, contig07153, contig10929, contig27612, contig11910, contig07495, contig07492, contig14337, contig132…
GO:0006006	glucose metabolic process	P	0.00332517	1.30774e-05	14	66	over	contig17929, contig17677, contig08740, contig26394, contig01223, contig24566, contig06175, contig10746, contig04172, contig06884, contig11073, contig02030, contig04368, contig04489	contig25939, contig05195, contig10355, contig04754, contig03116, contig24221, contig15689, contig11310, contig10411, contig22742, contig05300, contig02583, contig09710, contig04609, contig24341, contig04610, contig13603, contig07048, contig13694, contig06339, contig02416, contig06317, contig06332, contig15961, contig23603, contig05001, contig14031, contig03474, contig07855, contig07856, contig078…
GO:0046164	alcohol catabolic process	P	0.00574079	2.60511e-05	11	43	over	contig17929, contig17677, contig08740, contig26394, contig10746, contig04172, contig06884, contig11073, contig02030, contig04368, contig04489	contig14168, contig19774, contig23917, contig05195, contig10355, contig04754, contig03116, contig15689, contig10411, contig05300, contig02583, contig09710, contig13694, contig06339, contig02416, contig15961, contig23603, contig03474, contig07855, contig07856, contig07867, contig20050, contig27386, contig09283, contig08374, contig07153, contig10929, contig05759, contig27612, contig25412, contig119…
GO:0019685	photosynthesis, dark reaction	P	0.00839297	4.1895e-05	5	5	over	contig08847, contig02334, contig11073, contig04368, contig04937	contig03345, contig10411, contig06286, contig01230, contig25767
GO:0019318	hexose metabolic process	P	0.00843124	4.33614e-05	15	85	over	contig17929, contig25131, contig17677, contig08740, contig26394, contig01223, contig24566, contig06175, contig10746, contig04172, contig06884, contig11073, contig02030, contig04368, contig04489	contig08818, contig25939, contig05195, contig10355, contig13481, contig01121, contig04754, contig03116, contig24221, contig10457, contig15689, contig11310, contig10411, contig22742, contig05300, contig02583, contig09710, contig04609, contig24341, contig04610, contig18462, contig13603, contig07048, contig13694, contig06339, contig02416, contig06317, contig22169, contig06332, contig15961, contig236…
GO:0016051	carbohydrate biosynthetic process	P	0.0084789	4.60812e-05	13	65	over	contig02616, contig08847, contig08740, contig02334, contig24566, contig06175, contig21332, contig10746, contig04172, contig11073, contig04368, contig08097, contig04937	contig03345, contig23097, contig25939, contig18292, contig13441, contig01106, contig24221, contig12812, contig10411, contig22742, contig12867, contig07004, contig18458, contig13603, contig07048, contig19609, contig11444, contig22182, contig05001, contig14028, contig19639, contig20050, contig06286, contig20085, contig01230, contig16395, contig05972, contig22261, contig14516, contig10758, contig094…
GO:0016052	carbohydrate catabolic process	P	0.0102571	5.89579e-05	12	57	over	contig17929, contig17677, contig08740, contig20825, contig26394, contig10746, contig04172, contig06884, contig11073, contig02030, contig04368, contig04489	contig14168, contig19774, contig23917, contig05195, contig10355, contig04754, contig03116, contig15689, contig11310, contig10411, contig05300, contig02583, contig09710, contig04609, contig04610, contig13694, contig06339, contig02416, contig06332, contig15961, contig23603, contig03474, contig07855, contig07856, contig07867, contig20050, contig27386, contig09283, contig11700, contig08374, contig193…
GO:0005996	monosaccharide metabolic process	P	0.011171	6.92804e-05	15	89	over	contig17929, contig25131, contig17677, contig08740, contig26394, contig01223, contig24566, contig06175, contig10746, contig04172, contig06884, contig11073, contig02030, contig04368, contig04489	contig08818, contig19774, contig25939, contig05195, contig10355, contig13481, contig01121, contig04754, contig03116, contig24221, contig10457, contig15689, contig11310, contig10411, contig22742, contig05300, contig02583, contig09710, contig04609, contig24341, contig04610, contig18462, contig13603, contig07086, contig07048, contig13694, contig06339, contig02416, contig06317, contig22169, contig063…
GO:0044282	small molecule catabolic process	P	0.0120608	7.66227e-05	16	101	over	contig17929, contig17677, contig08740, contig28597, contig26394, contig01223, contig13775, contig13865, contig10746, contig04172, contig11996, contig06884, contig11073, contig02030, contig04368, contig04489	contig14168, contig18216, contig03340, contig19774, contig23917, contig05195, contig24194, contig24182, contig10355, contig25986, contig16097, contig15707, contig02640, contig04754, contig03116, contig18370, contig04765, contig22085, contig15689, contig10411, contig19963, contig12881, contig05300, contig02583, contig09710, contig04651, contig11463, contig25387, contig10553, contig13694, contig085…
GO:0005975	carbohydrate metabolic process	P	0.0122139	8.04067e-05	25	212	over	contig02616, contig17929, contig17623, contig25131, contig08847, contig17677, contig08740, contig25039, contig20825, contig26394, contig01223, contig02334, contig24566, contig06175, contig21332, contig10746, contig19354, contig04172, contig06884, contig11073, contig02030, contig04368, contig08097, contig04937, contig04489	contig03345, contig14168, contig23097, contig06643, contig09936, contig08818, contig19774, contig23917, contig25939, contig08833, contig05195, contig25912, contig18292, contig13441, contig10355, contig13481, contig00371, contig13469, contig01121, contig01106, contig09863, contig21796, contig03294, contig16053, contig09895, contig09893, contig14283, contig04754, contig03116, contig04761, contig047…
GO:0006090	pyruvate metabolic process	P	0.0142255	0.000105476	6	12	over	contig08740, contig24566, contig06175, contig10746, contig04172, contig11073	contig24221, contig22022, contig23603, contig05001, contig20050, contig10018, contig14693, contig10929, contig15241, contig06678, contig01637, contig04483
GO:0044275	cellular carbohydrate catabolic process	P	0.0147677	0.000116158	11	52	over	contig17929, contig17677, contig08740, contig26394, contig10746, contig04172, contig06884, contig11073, contig02030, contig04368, contig04489	contig14168, contig19774, contig23917, contig05195, contig10355, contig04754, contig03116, contig15689, contig11310, contig10411, contig05300, contig02583, contig09710, contig04609, contig04610, contig13694, contig06339, contig02416, contig06332, contig15961, contig23603, contig03474, contig07855, contig07856, contig07867, contig20050, contig27386, contig09283, contig11700, contig08374, contig193…
GO:0015986	ATP synthesis coupled proton transport	P	0.0266402	0.000265958	7	22	over	contig08773, contig03048, contig09260, contig01471, contig05710, contig11967, contig16689	contig14172, contig03340, contig11251, contig10359, contig10312, contig24217, contig03060, contig04628, contig03521, contig07983, contig13713, contig01530, contig01529, contig06980, contig01787, contig09615, contig18922, contig02764, contig02763, contig08949, contig26770, contig04919
GO:0015985	energy coupled proton transport, down electrochemical gradient	P	0.0266402	0.000265958	7	22	over	contig08773, contig03048, contig09260, contig01471, contig05710, contig11967, contig16689	contig14172, contig03340, contig11251, contig10359, contig10312, contig24217, contig03060, contig04628, contig03521, contig07983, contig13713, contig01530, contig01529, contig06980, contig01787, contig09615, contig18922, contig02764, contig02763, contig08949, contig26770, contig04919
GO:0044262	cellular carbohydrate metabolic process	P	0.0319196	0.000328321	19	154	over	contig02616, contig17929, contig17623, contig25131, contig17677, contig08740, contig26394, contig01223, contig24566, contig06175, contig21332, contig10746, contig04172, contig06884, contig11073, contig02030, contig04368, contig08097, contig04489	contig14168, contig23097, contig08818, contig19774, contig23917, contig25939, contig05195, contig18292, contig13441, contig10355, contig13481, contig01121, contig09863, contig21796, contig03294, contig16053, contig14283, contig04754, contig03116, contig24221, contig10457, contig15689, contig12812, contig11310, contig10411, contig21621, contig08626, contig22742, contig05300, contig02583, contig097…
GO:0019252	starch biosynthetic process	P	0.0336188	0.000376311	3	1	over	contig02616, contig21332, contig08097	contig06286
GO:0005982	starch metabolic process	P	0.0336188	0.000376311	3	1	over	contig02616, contig21332, contig08097	contig06286
GO:0019319	hexose biosynthetic process	P	0.04009	0.000472243	6	17	over	contig08740, contig24566, contig06175, contig10746, contig04172, contig11073	contig24221, contig05001, contig20050, contig16395, contig09408, contig02244, contig06930, contig06931, contig06934, contig06937, contig10929, contig25412, contig04260, contig14360, contig06678, contig01637, contig04483
GO:0046364	monosaccharide biosynthetic process	P	0.0495465	0.000605705	6	18	over	contig08740, contig24566, contig06175, contig10746, contig04172, contig11073	contig24221, contig05001, contig20050, contig16395, contig09408, contig02244, contig06930, contig06931, contig06934, contig06937, contig10929, contig25412, contig04260, contig14360, contig06678, contig01637, contig08033, contig04483
GO:0034637	cellular carbohydrate biosynthetic process	P	0.0495465	0.000607058	9	44	over	contig02616, contig08740, contig24566, contig06175, contig21332, contig10746, contig04172, contig11073, contig08097	contig23097, contig18292, contig13441, contig24221, contig12812, contig07004, contig18458, contig13603, contig22182, contig05001, contig14028, contig19639, contig20050, contig06286, contig20085, contig16395, contig05972, contig22261, contig09408, contig02244, contig06930, contig06931, contig06934, contig06937, contig07187, contig10929, contig01436, contig01432, contig09300, contig19470, contig254…
