# Supplementary material for: Transcriptomic Analysis of Acclimation to Temperature and Light Stress in Saccharina latissima (Phaeophyceae)
Source: PLoS One. 2012 Aug 28;7(8):e44342. doi: 10.1371/journal.pone.0044342 (PMC3429442; doi:10.1371/journal.pone.0044342)
Supplement: Table S2 — Full list of over-represented Gene Ontology terms for all stress conditions. (XLS) [file pone.0044342.s002.xls]

## Sheet: 2°C high PAR
2°C high PAR
GO-ID	Term	Category	FDR	P-Value	#Test	#Ref	#notAnnotTest	#notAnnotRef	Over/Under	TestSeqs	RefSeqs
GO:0009536	plastid	C	5.68345e-08	8.65077e-12	118	250	663	3295	over	contig18250, contig04863, contig14115, contig08792, contig08748, contig27356, contig08759, contig16093, contig02680, contig03291, contig02662, contig16202, contig04769, contig02508, contig27166, contig25865, contig01035, contig02562, contig09074, contig15618, contig12098, contig16130, contig28598, contig19542, contig19602, contig11422, contig13678, contig02465, contig12548, contig22113, contig185…	contig02616, contig02615, contig03345, contig03351, contig14154, contig05115, contig14163, contig18209, contig17949, contig05165, contig03384, contig11251, contig05195, contig08847, contig07742, contig07658, contig11212, contig27330, contig13485, contig08754, contig11206, contig01916, contig01925, contig07692, contig08774, contig08773, contig19836, contig01939, contig08764, contig12790, contig160…
GO:0005634	nucleus	C	1.85344e-06	8.4107e-10	130	951	651	2594	over	contig09938, contig07700, contig24135, contig08854, contig08852, contig17683, contig23951, contig13436, contig07687, contig01914, contig16093, contig15774, contig05283, contig18326, contig05296, contig07621, contig25059, contig04790, contig11398, contig07598, contig07596, contig12888, contig12087, contig01898, contig02515, contig09044, contig01872, contig18456, contig12563, contig23740, contig163…	contig14956, contig17901, contig23983, contig03351, contig04885, contig05136, contig04851, contig18228, contig05125, contig05121, contig14176, contig02606, contig23089, contig23977, contig23978, contig14167, contig06622, contig06623, contig04831, contig23081, contig09902, contig14111, contig14112, contig17953, contig23074, contig06620, contig23067, contig09924, contig03369, contig23063, contig099…
GO:0009507	chloroplast	C	3.12635e-06	1.8916e-09	88	180	693	3365	over	contig04863, contig14115, contig08792, contig08748, contig27356, contig02680, contig03291, contig02662, contig16202, contig04769, contig25865, contig01035, contig02562, contig09074, contig15618, contig12098, contig28598, contig19542, contig13678, contig02465, contig22113, contig26375, contig03481, contig04549, contig07844, contig20900, contig03429, contig01237, contig01236, contig02364, contig002…	contig02615, contig03345, contig03351, contig14154, contig05115, contig14163, contig18209, contig17949, contig05165, contig03384, contig11251, contig05195, contig08847, contig07658, contig27330, contig13485, contig01925, contig08774, contig08773, contig19836, contig01939, contig08764, contig12790, contig20598, contig09012, contig14247, contig03250, contig24218, contig07610, contig04788, contig104…
GO:0032991	macromolecular complex	C	0.000150588	1.45958e-07	135	922	646	2623	over	contig22908, contig04863, contig17929, contig09938, contig24135, contig25167, contig23951, contig08792, contig15795, contig20531, contig27356, contig16093, contig02680, contig01977, contig15774, contig02662, contig02640, contig14092, contig09018, contig05283, contig05296, contig25059, contig01803, contig07598, contig12888, contig02562, contig09719, contig16121, contig12062, contig01883, contig097…	contig14955, contig02615, contig03345, contig14959, contig17901, contig03351, contig14153, contig14135, contig04885, contig05130, contig05136, contig04851, contig05121, contig14172, contig18218, contig03340, contig23978, contig06622, contig06623, contig04831, contig09902, contig14108, contig14111, contig18215, contig09924, contig09926, contig14129, contig05167, contig03385, contig03380, contig179…
GO:0044422	organelle part	C	0.000150588	1.59449e-07	179	1145	602	2400	over	contig22908, contig14115, contig24135, contig08854, contig08852, contig23951, contig13436, contig08792, contig17577, contig20531, contig08748, contig01914, contig16093, contig16045, contig02680, contig15774, contig02640, contig14092, contig09018, contig09006, contig04769, contig18326, contig14212, contig18318, contig05296, contig25059, contig11398, contig13573, contig07598, contig11326, contig128…	contig14955, contig14956, contig14147, contig18249, contig17901, contig04879, contig03351, contig14153, contig14135, contig04885, contig05130, contig05136, contig05115, contig04851, contig18228, contig05125, contig05121, contig14172, contig18216, contig18218, contig03340, contig23089, contig23978, contig06622, contig23085, contig06623, contig04831, contig18209, contig03036, contig09902, contig141…
GO:0044446	intracellular organelle part	C	0.000162747	1.96941e-07	179	1143	602	2402	over	contig22908, contig14115, contig24135, contig08854, contig08852, contig23951, contig13436, contig08792, contig17577, contig20531, contig08748, contig01914, contig16093, contig16045, contig02680, contig15774, contig02640, contig14092, contig09018, contig09006, contig04769, contig18326, contig14212, contig18318, contig05296, contig25059, contig11398, contig13573, contig07598, contig11326, contig128…	contig14955, contig14956, contig14147, contig18249, contig17901, contig04879, contig03351, contig14153, contig14135, contig04885, contig05130, contig05136, contig05115, contig04851, contig18228, contig05125, contig05121, contig14172, contig18216, contig18218, contig03340, contig23089, contig23978, contig06622, contig23085, contig06623, contig04831, contig18209, contig03036, contig09902, contig141…
GO:0043234	protein complex	C	0.000279939	4.34145e-07	76	591	705	2954	over	contig22908, contig04863, contig17929, contig09938, contig08792, contig02680, contig01977, contig02640, contig14092, contig09018, contig05296, contig25059, contig07598, contig12888, contig16121, contig01883, contig09772, contig16351, contig04610, contig04621, contig17388, contig06332, contig22149, contig22115, contig14010, contig26375, contig03429, contig19636, contig27379, contig16950, contig115…	contig14955, contig02615, contig03345, contig14959, contig17901, contig14153, contig04851, contig05121, contig14172, contig03340, contig06622, contig06623, contig04831, contig09902, contig14108, contig14111, contig18215, contig09924, contig09926, contig14129, contig05167, contig03385, contig03380, contig17993, contig08830, contig25110, contig23917, contig11259, contig20609, contig24146, contig112…
GO:0044428	nuclear part	C	0.000322599	5.85567e-07	64	520	717	3025	over	contig24135, contig08854, contig08852, contig23951, contig13436, contig01914, contig15774, contig18326, contig25059, contig11398, contig07598, contig12888, contig01898, contig09044, contig01872, contig18456, contig23740, contig16351, contig08565, contig09159, contig06332, contig09192, contig12515, contig15941, contig26375, contig19679, contig13735, contig27379, contig02364, contig01263, contig169…	contig14956, contig17901, contig03351, contig04885, contig04851, contig18228, contig05125, contig05121, contig23089, contig23978, contig06622, contig06623, contig04831, contig09902, contig14111, contig14112, contig06620, contig09924, contig03380, contig11251, contig08830, contig11257, contig11230, contig17969, contig07757, contig25959, contig25169, contig13426, contig10354, contig13415, contig103…
GO:0005829	cytosol	C	0.00127706	4.52962e-06	94	666	687	2879	over	contig05146, contig04863, contig14109, contig17929, contig09938, contig03013, contig07700, contig21805, contig17683, contig23951, contig20531, contig13481, contig01921, contig05224, contig09890, contig05283, contig05296, contig03151, contig07621, contig07596, contig12087, contig09719, contig02515, contig09044, contig04610, contig03562, contig11463, contig17388, contig13678, contig20799, contig063…	contig02616, contig14959, contig23983, contig03351, contig14153, contig14135, contig23997, contig05130, contig22905, contig04851, contig14176, contig02606, contig18218, contig14167, contig23081, contig17949, contig14108, contig26694, contig14112, contig17953, contig23074, contig26675, contig06620, contig06604, contig09924, contig23063, contig14129, contig14130, contig05167, contig09932, contig176…
GO:0044434	chloroplast part	C	0.00631508	5.23995e-05	33	60	748	3485	over	contig14115, contig08792, contig08748, contig02680, contig04769, contig15618, contig12098, contig03481, contig07844, contig20900, contig05993, contig06207, contig05910, contig06246, contig12670, contig06177, contig16890, contig08305, contig16816, contig03620, contig03623, contig02095, contig14634, contig12486, contig09341, contig02889, contig13250, contig19190, contig14339, contig04334, contig284…	contig05115, contig03384, contig05195, contig08847, contig08774, contig19836, contig12790, contig20598, contig14247, contig03250, contig10456, contig13581, contig27106, contig06449, contig01894, contig07906, contig23768, contig07013, contig07931, contig10553, contig02422, contig00197, contig05064, contig09203, contig07843, contig13718, contig06286, contig22251, contig13027, contig20106, contig130…
GO:0010287	plastoglobule	C	0.00702988	6.56525e-05	12	9	769	3536	over	contig08748, contig04769, contig12098, contig07844, contig20900, contig06207, contig12670, contig16816, contig03620, contig09341, contig19190, contig00606	contig08774, contig20598, contig09203, contig22251, contig07481, contig01753, contig15423, contig04489, contig27896
GO:0044435	plastid part	C	0.00832935	8.1895e-05	34	64	747	3481	over	contig14115, contig08792, contig08748, contig02680, contig04769, contig15618, contig12098, contig03481, contig07844, contig20900, contig05993, contig06207, contig05910, contig06246, contig12670, contig06177, contig16890, contig08305, contig16816, contig03620, contig03623, contig02095, contig14634, contig12486, contig09341, contig02889, contig13250, contig19190, contig14339, contig28226, contig043…	contig05115, contig03384, contig05195, contig08847, contig08774, contig19836, contig12790, contig20598, contig14247, contig03250, contig10456, contig13581, contig27106, contig06449, contig02513, contig01894, contig07906, contig23768, contig19591, contig07013, contig07931, contig10553, contig02422, contig00197, contig05064, contig09203, contig07843, contig13718, contig06286, contig22251, contig130…
GO:0043226	organelle	C	0.0119202	0.000135232	380	1994	401	1551	over	contig18250, contig22908, contig03360, contig04863, contig17943, contig09938, contig03009, contig14115, contig08828, contig07700, contig24135, contig08854, contig08852, contig21805, contig17683, contig23951, contig13432, contig13436, contig08792, contig07687, contig17577, contig15795, contig20531, contig08748, contig11208, contig01914, contig27356, contig08759, contig16093, contig16074, contig160…	contig14955, contig17905, contig14956, contig14147, contig02616, contig02615, contig18249, contig03344, contig03345, contig16105, contig17901, contig04879, contig16107, contig23983, contig03351, contig14154, contig14153, contig14135, contig04885, contig23997, contig05130, contig05136, contig22905, contig05115, contig04851, contig04854, contig18228, contig05125, contig05121, contig14172, contig141…
GO:0043229	intracellular organelle	C	0.0158517	0.000187026	380	1988	401	1557	over	contig18250, contig22908, contig03360, contig04863, contig17943, contig09938, contig03009, contig14115, contig08828, contig07700, contig24135, contig08854, contig08852, contig21805, contig17683, contig23951, contig13432, contig13436, contig08792, contig07687, contig17577, contig15795, contig20531, contig08748, contig11208, contig01914, contig27356, contig08759, contig16093, contig16074, contig160…	contig14955, contig17905, contig14956, contig14147, contig02616, contig02615, contig18249, contig03344, contig03345, contig16105, contig17901, contig04879, contig16107, contig23983, contig03351, contig14154, contig14153, contig14135, contig04885, contig23997, contig05130, contig05136, contig22905, contig05115, contig04851, contig04854, contig18228, contig05125, contig05121, contig14172, contig141…
GO:0044424	intracellular part	C	0.0437645	0.000675083	466	2345	315	1200	over	contig05146, contig18250, contig22908, contig03360, contig04863, contig17943, contig14109, contig17929, contig09938, contig03009, contig14115, contig03013, contig07721, contig08828, contig07700, contig24135, contig08854, contig08852, contig25167, contig21805, contig17683, contig23951, contig13432, contig13436, contig08792, contig08798, contig07687, contig17577, contig15795, contig20531, contig087…	contig14955, contig17905, contig14956, contig14147, contig02616, contig02615, contig18249, contig03344, contig03345, contig16105, contig14959, contig17901, contig04879, contig16107, contig23983, contig03351, contig14154, contig14153, contig14135, contig04885, contig23997, contig05130, contig05136, contig22905, contig14168, contig05115, contig04851, contig04854, contig18228, contig05125, contig051…
GO:0031981	nuclear lumen	C	0.0467673	0.000799381	51	367	730	3178	over	contig24135, contig08854, contig08852, contig23951, contig13436, contig25059, contig11398, contig07598, contig12888, contig01898, contig09044, contig01872, contig18456, contig23740, contig16351, contig06332, contig09192, contig12515, contig15941, contig19679, contig13735, contig02364, contig01263, contig16950, contig16963, contig15897, contig18608, contig22974, contig15033, contig03795, contig138…	contig14956, contig03351, contig04851, contig18228, contig05121, contig09902, contig14111, contig06620, contig09924, contig03380, contig11251, contig08830, contig11257, contig07757, contig25959, contig13426, contig10354, contig13415, contig10345, contig13408, contig08750, contig10312, contig20519, contig22871, contig08764, contig16068, contig01148, contig05214, contig12733, contig16013, contig127…
GO:0005515	protein binding	F	5.68345e-08	1.71939e-11	195	1328	586	2217	over	contig22908, contig04863, contig14109, contig09938, contig14115, contig03013, contig07721, contig17638, contig08828, contig07700, contig21805, contig17682, contig13436, contig08782, contig20531, contig13481, contig11208, contig01914, contig01921, contig16093, contig16074, contig02680, contig16057, contig01977, contig05224, contig09890, contig16202, contig18370, contig03109, contig05283, contig142…	contig14956, contig14147, contig02615, contig03344, contig14959, contig17901, contig06673, contig23983, contig14153, contig04885, contig23997, contig22905, contig06649, contig04851, contig18228, contig05125, contig05121, contig14176, contig03338, contig18218, contig03340, contig23089, contig18220, contig23978, contig06622, contig06623, contig24130, contig04831, contig09902, contig14108, contig099…
GO:0016741	transferase activity, transferring one-carbon groups	F	0.000279939	4.65788e-07	35	50	746	3495	over	contig14156, contig08854, contig20522, contig01931, contig02694, contig09847, contig09018, contig02508, contig05283, contig14219, contig10466, contig03173, contig06412, contig04610, contig06332, contig14010, contig26289, contig11735, contig11700, contig18745, contig06025, contig14652, contig02995, contig06994, contig09320, contig15232, contig04271, contig13250, contig02803, contig04375, contig122…	contig17903, contig06659, contig09902, contig25901, contig17616, contig07673, contig21728, contig27301, contig04803, contig23870, contig03124, contig11348, contig19929, contig11310, contig08653, contig08655, contig10449, contig12881, contig12894, contig09035, contig09037, contig28597, contig04609, contig00106, contig20785, contig28613, contig16283, contig06368, contig26374, contig08446, contig169…
GO:0016491	oxidoreductase activity	F	0.00185569	7.57884e-06	128	371	653	3174	over	contig04863, contig17943, contig05189, contig14115, contig17964, contig18291, contig17682, contig00366, contig01124, contig11208, contig08759, contig01977, contig02640, contig16202, contig18370, contig09803, contig14212, contig18318, contig03286, contig03151, contig27166, contig20722, contig04790, contig12014, contig08619, contig01066, contig03084, contig01833, contig03092, contig01068, contig010…	contig03345, contig17901, contig04879, contig16107, contig23983, contig02628, contig02620, contig14168, contig06649, contig02606, contig05111, contig14167, contig17944, contig18209, contig17946, contig03036, contig04836, contig26694, contig05187, contig17954, contig03035, contig14127, contig09932, contig19774, contig20605, contig19776, contig23917, contig11259, contig25939, contig11227, contig088…
GO:0008168	methyltransferase activity	F	0.004229	2.88232e-05	29	47	752	3498	over	contig14156, contig08854, contig20522, contig01931, contig02694, contig09847, contig02508, contig05283, contig14219, contig10466, contig03173, contig06412, contig14010, contig26289, contig11735, contig18745, contig06025, contig14652, contig02995, contig06994, contig09320, contig15232, contig04271, contig13250, contig02803, contig07308, contig06689, contig05559, contig01602	contig17903, contig06659, contig09902, contig25901, contig17616, contig07673, contig21728, contig27301, contig04803, contig23870, contig03124, contig11348, contig19929, contig08653, contig08655, contig10449, contig12881, contig12894, contig09035, contig09037, contig28597, contig00106, contig20785, contig28613, contig16283, contig06368, contig26374, contig08446, contig16958, contig08430, contig115…
GO:0015930	glutamate synthase activity	F	0.0323602	0.000440542	7	3	774	3542	over	contig16202, contig27166, contig19602, contig12548, contig06972, contig08991, contig19167	contig18425, contig12603, contig17197
GO:0044106	cellular amine metabolic process	P	0.000365625	8.19933e-07	75	170	706	3375	over	contig08798, contig01921, contig16098, contig09881, contig02640, contig16202, contig09018, contig18370, contig27166, contig07600, contig17748, contig07621, contig12013, contig08619, contig06478, contig02539, contig04610, contig19542, contig11463, contig19602, contig11422, contig08538, contig16277, contig06332, contig12548, contig22115, contig18587, contig20038, contig07837, contig13775, contig059…	contig18249, contig23983, contig06649, contig05115, contig18216, contig14163, contig24130, contig25986, contig17587, contig13483, contig20503, contig08763, contig16068, contig16048, contig01994, contig06589, contig05259, contig14271, contig11342, contig00420, contig17870, contig07615, contig25866, contig20655, contig10453, contig20687, contig11310, contig19063, contig02596, contig27243, contig128…
GO:0006520	cellular amino acid metabolic process	P	0.000365625	8.29582e-07	71	157	710	3388	over	contig08798, contig01921, contig16098, contig09881, contig02640, contig16202, contig09018, contig18370, contig27166, contig07600, contig17748, contig07621, contig12013, contig08619, contig06478, contig02539, contig04610, contig19542, contig19602, contig11422, contig08538, contig16277, contig06332, contig12548, contig22115, contig18587, contig20038, contig07837, contig13775, contig05954, contig262…	contig23983, contig06649, contig05115, contig18216, contig14163, contig24130, contig25986, contig13483, contig20503, contig08763, contig16068, contig16048, contig01994, contig06589, contig05259, contig14271, contig11342, contig00420, contig17870, contig07615, contig25866, contig10453, contig20687, contig11310, contig19063, contig02596, contig12881, contig21695, contig01063, contig12091, contig156…
GO:0065007	biological regulation	P	0.000987298	2.83749e-06	138	902	643	2643	over	contig09938, contig03009, contig03013, contig21805, contig17683, contig13432, contig17577, contig00366, contig01914, contig27363, contig16074, contig16045, contig01977, contig02640, contig09018, contig03109, contig05283, contig24254, contig14212, contig18318, contig05296, contig03151, contig07621, contig25059, contig11398, contig10466, contig07570, contig07598, contig11326, contig02562, contig030…	contig14955, contig14147, contig17903, contig16105, contig14959, contig17901, contig23997, contig05130, contig04893, contig22905, contig04851, contig05125, contig05121, contig14172, contig05107, contig23097, contig03340, contig23089, contig17944, contig06623, contig24130, contig04831, contig23081, contig09902, contig17949, contig26694, contig14111, contig18215, contig17953, contig26675, contig066…
GO:0006519	cellular amino acid and derivative metabolic process	P	0.0011331	3.59931e-06	78	189	703	3356	over	contig08798, contig01921, contig16098, contig09881, contig02640, contig16202, contig09018, contig18370, contig27166, contig07600, contig17748, contig07621, contig12013, contig08619, contig06478, contig02539, contig04610, contig03563, contig19542, contig11463, contig19602, contig11422, contig08538, contig16277, contig06332, contig12548, contig22115, contig18587, contig20038, contig07837, contig137…	contig18249, contig23983, contig06649, contig05115, contig18216, contig14163, contig24130, contig11227, contig25986, contig07658, contig17587, contig13483, contig20503, contig08763, contig16068, contig16048, contig01994, contig06589, contig05259, contig14271, contig04773, contig09816, contig11342, contig00420, contig17870, contig07615, contig25866, contig08681, contig20655, contig10453, contig206…
GO:0009308	amine metabolic process	P	0.00127706	4.47088e-06	75	179	706	3366	over	contig08798, contig01921, contig16098, contig09881, contig02640, contig16202, contig09018, contig18370, contig27166, contig07600, contig17748, contig07621, contig12013, contig08619, contig06478, contig02539, contig04610, contig19542, contig11463, contig19602, contig11422, contig08538, contig16277, contig06332, contig12548, contig22115, contig18587, contig20038, contig07837, contig13775, contig059…	contig18249, contig23983, contig06649, contig05115, contig18216, contig14163, contig24130, contig07717, contig25939, contig25986, contig17587, contig13483, contig20503, contig08763, contig16068, contig16048, contig01994, contig06589, contig05259, contig14271, contig11342, contig00420, contig17870, contig07615, contig25866, contig20655, contig10453, contig20687, contig11310, contig19063, contig025…
GO:0050794	regulation of cellular process	P	0.00127706	4.63612e-06	91	647	690	2898	over	contig09938, contig03009, contig03013, contig21805, contig17683, contig17577, contig00366, contig27363, contig16045, contig01977, contig02640, contig03109, contig24254, contig14212, contig18318, contig05296, contig03151, contig07621, contig25059, contig07598, contig02562, contig03067, contig15618, contig01883, contig09772, contig02515, contig01872, contig12586, contig06412, contig03562, contig035…	contig14147, contig17903, contig16105, contig14959, contig17901, contig23997, contig05130, contig04893, contig22905, contig04851, contig05125, contig05121, contig03340, contig06623, contig24130, contig09902, contig17949, contig26694, contig14111, contig17953, contig06620, contig23067, contig09924, contig03369, contig09926, contig14127, contig14129, contig03385, contig05156, contig03380, contig051…
GO:0032502	developmental process	P	0.00192416	8.1495e-06	80	581	701	2964	over	contig04863, contig07700, contig20531, contig01921, contig16074, contig03109, contig24254, contig03151, contig11398, contig07598, contig11326, contig01041, contig12888, contig09074, contig16121, contig12586, contig16351, contig12595, contig11463, contig11442, contig17388, contig08557, contig08565, contig02416, contig22133, contig22149, contig22113, contig12515, contig14010, contig18587, contig115…	contig14955, contig14147, contig14148, contig17901, contig05125, contig23097, contig03340, contig23089, contig18220, contig06622, contig04831, contig09902, contig09910, contig18215, contig06620, contig23067, contig09924, contig09926, contig09928, contig25939, contig24164, contig24146, contig11230, contig11227, contig25901, contig17969, contig17616, contig11229, contig24141, contig07757, contig077…
GO:0016043	cellular component organization	P	0.00198278	8.78244e-06	78	570	703	2975	over	contig22908, contig04863, contig01914, contig16093, contig16074, contig02680, contig09018, contig05283, contig05296, contig03151, contig25059, contig11398, contig07598, contig12087, contig15618, contig01883, contig09772, contig23740, contig06412, contig08565, contig14010, contig01263, contig16950, contig16963, contig08431, contig16995, contig06275, contig15033, contig13855, contig05597, contig100…	contig17903, contig14153, contig23997, contig05136, contig22905, contig04851, contig05125, contig05121, contig14172, contig23097, contig23089, contig06622, contig06623, contig04831, contig14108, contig14111, contig09910, contig09924, contig03369, contig23063, contig09926, contig14129, contig05167, contig05165, contig03380, contig05152, contig17641, contig17993, contig08816, contig08830, contig241…
GO:0055114	oxidation reduction	P	0.00198278	8.99762e-06	88	228	693	3317	over	contig04863, contig05189, contig14115, contig17964, contig18291, contig17682, contig00366, contig11208, contig08759, contig02640, contig16202, contig09006, contig09803, contig03158, contig14212, contig03151, contig27166, contig20722, contig04790, contig12014, contig08619, contig15618, contig03092, contig12586, contig04621, contig07989, contig03562, contig03563, contig19536, contig19542, contig070…	contig02615, contig03345, contig04879, contig23983, contig14168, contig02606, contig14167, contig04836, contig26694, contig05187, contig17954, contig03035, contig14127, contig19774, contig20605, contig19776, contig23917, contig25939, contig11227, contig17974, contig25165, contig24189, contig11280, contig13440, contig13415, contig17567, contig10339, contig01911, contig01918, contig10313, contig019…
GO:0050789	regulation of biological process	P	0.00202511	9.94602e-06	120	793	661	2752	over	contig09938, contig03009, contig03013, contig21805, contig17683, contig13432, contig17577, contig00366, contig27363, contig16074, contig16045, contig01977, contig02640, contig03109, contig24254, contig14212, contig18318, contig05296, contig03151, contig07621, contig25059, contig10466, contig07570, contig07598, contig11326, contig02562, contig03067, contig09074, contig15618, contig01883, contig097…	contig14955, contig14147, contig17903, contig16105, contig14959, contig17901, contig23997, contig05130, contig04893, contig22905, contig04851, contig05125, contig05121, contig05107, contig23097, contig03340, contig06623, contig24130, contig04831, contig23081, contig09902, contig17949, contig26694, contig14111, contig18215, contig17953, contig26675, contig06620, contig23067, contig09924, contig033…
GO:0008652	cellular amino acid biosynthetic process	P	0.00467211	3.32157e-05	37	70	744	3475	over	contig16098, contig09881, contig16202, contig09018, contig27166, contig17748, contig07621, contig12013, contig08619, contig06478, contig02539, contig04610, contig19542, contig19602, contig11422, contig16277, contig06332, contig12548, contig07837, contig06246, contig13827, contig11700, contig07162, contig06972, contig02188, contig15232, contig13250, contig08991, contig19167, contig11184, contig133…	contig23983, contig06649, contig05115, contig14163, contig13483, contig08763, contig16068, contig16048, contig06589, contig14271, contig00420, contig17870, contig07615, contig10453, contig19063, contig21695, contig01063, contig12091, contig15641, contig12076, contig15646, contig18425, contig07999, contig07013, contig01372, contig15979, contig10517, contig05064, contig09250, contig03457, contig092…
GO:0006464	protein modification process	P	0.00702988	6.59284e-05	48	378	733	3167	over	contig09938, contig07700, contig21805, contig17683, contig08748, contig16057, contig05283, contig05296, contig18402, contig01832, contig01883, contig09772, contig12586, contig06412, contig11463, contig11442, contig06332, contig22133, contig09192, contig14010, contig20048, contig11535, contig21481, contig15828, contig14555, contig18754, contig16876, contig16890, contig13894, contig25554, contig146…	contig02615, contig17903, contig14959, contig18238, contig04851, contig14176, contig04831, contig14111, contig23074, contig06620, contig09924, contig23063, contig09926, contig03385, contig05156, contig03380, contig25901, contig11229, contig07740, contig19807, contig08789, contig10365, contig10341, contig10345, contig13408, contig10337, contig13485, contig10312, contig08774, contig08758, contig198…
GO:0048856	anatomical structure development	P	0.00867931	8.79616e-05	51	393	730	3152	over	contig04863, contig07700, contig16074, contig24254, contig11398, contig07598, contig11326, contig12888, contig09074, contig16121, contig12586, contig12595, contig11442, contig17388, contig08557, contig08565, contig22133, contig22113, contig18587, contig11535, contig26285, contig20173, contig06172, contig18754, contig10721, contig16876, contig02284, contig09450, contig15104, contig25580, contig153…	contig14147, contig14148, contig17901, contig05125, contig23097, contig03340, contig18220, contig09902, contig09910, contig18215, contig06620, contig23067, contig09924, contig09926, contig09928, contig25939, contig24164, contig11230, contig25901, contig17616, contig24141, contig07732, contig10370, contig13426, contig13415, contig20547, contig10345, contig13409, contig10312, contig20516, contig011…
GO:0009309	amine biosynthetic process	P	0.00985048	0.000105192	38	77	743	3468	over	contig16098, contig09881, contig16202, contig09018, contig27166, contig17748, contig07621, contig12013, contig08619, contig06478, contig02539, contig04610, contig19542, contig19602, contig11422, contig16277, contig06332, contig12548, contig07837, contig06246, contig13827, contig11700, contig05670, contig07162, contig06972, contig02188, contig15232, contig13250, contig08991, contig19167, contig111…	contig23983, contig06649, contig05115, contig14163, contig17587, contig13483, contig08763, contig16068, contig16048, contig06589, contig14271, contig00420, contig17870, contig07615, contig20655, contig10453, contig19063, contig27243, contig21695, contig01063, contig12091, contig15641, contig12076, contig15646, contig18425, contig07999, contig07013, contig01372, contig15979, contig21564, contig105…
GO:0007275	multicellular organismal development	P	0.00985048	0.000105791	70	497	711	3048	over	contig04863, contig07700, contig20531, contig01921, contig16074, contig03109, contig24254, contig03151, contig11398, contig07598, contig11326, contig12888, contig09074, contig16121, contig12586, contig16351, contig12595, contig11463, contig17388, contig08557, contig08565, contig02416, contig22133, contig22149, contig22113, contig12515, contig14010, contig18587, contig11535, contig26285, contig186…	contig14955, contig14147, contig14148, contig17901, contig05125, contig23097, contig03340, contig18220, contig06622, contig04831, contig09902, contig09910, contig18215, contig06620, contig23067, contig09924, contig09926, contig09928, contig25939, contig24164, contig11230, contig11227, contig25901, contig17616, contig24141, contig07757, contig07732, contig19807, contig10370, contig13426, contig134…
GO:0000003	reproduction	P	0.015168	0.000176665	33	281	748	3264	over	contig04863, contig03009, contig07721, contig20531, contig01921, contig11326, contig08557, contig02416, contig12515, contig11567, contig11535, contig20173, contig09450, contig06917, contig03662, contig10869, contig27648, contig15223, contig15241, contig25448, contig13286, contig13202, contig07446, contig12115, contig18958, contig01704, contig11184, contig13364, contig12223, contig05555, contig170…	contig14955, contig18249, contig06622, contig06620, contig09924, contig09926, contig24164, contig24146, contig11230, contig11227, contig25901, contig17616, contig07757, contig07746, contig07732, contig17653, contig13415, contig10337, contig10312, contig01118, contig20503, contig15712, contig16053, contig12744, contig12740, contig16029, contig15748, contig24904, contig04773, contig23870, contig142…
GO:0009064	glutamine family amino acid metabolic process	P	0.0207732	0.000257661	20	30	761	3515	over	contig16202, contig09018, contig27166, contig06478, contig02539, contig04610, contig19602, contig06332, contig12548, contig05954, contig11700, contig06972, contig02188, contig08991, contig19167, contig04375, contig12276, contig11184, contig13364, contig07327	contig24130, contig11342, contig11310, contig21695, contig15646, contig04609, contig18425, contig07999, contig25393, contig04698, contig04697, contig05821, contig09250, contig09248, contig01223, contig05953, contig12603, contig13865, contig11766, contig17197, contig19374, contig14676, contig21264, contig26108, contig06968, contig09328, contig18966, contig10966, contig15504, contig05546
GO:0009790	embryonic development	P	0.0386565	0.000532104	26	228	755	3317	over	contig04863, contig01921, contig07598, contig11326, contig12888, contig08557, contig08565, contig02416, contig12515, contig14010, contig09450, contig25580, contig06917, contig14652, contig03662, contig13914, contig10869, contig27648, contig15223, contig15241, contig12115, contig01704, contig11184, contig13364, contig18191, contig15471	contig14955, contig14148, contig05125, contig06622, contig06620, contig09924, contig25939, contig11230, contig17616, contig19807, contig10370, contig13426, contig13415, contig10312, contig20516, contig20503, contig20508, contig16097, contig09831, contig15712, contig22829, contig12744, contig12740, contig16206, contig24904, contig14270, contig23876, contig23870, contig14247, contig05292, contig177…
GO:0043687	post-translational protein modification	P	0.0392104	0.000559402	39	304	742	3241	over	contig09938, contig07700, contig21805, contig17683, contig08748, contig16057, contig05283, contig05296, contig18402, contig01883, contig09772, contig12586, contig06412, contig06332, contig09192, contig14010, contig20048, contig11535, contig14555, contig16876, contig16890, contig13894, contig25554, contig14652, contig02995, contig12486, contig13914, contig02985, contig09341, contig25448, contig152…	contig02615, contig17903, contig14959, contig04851, contig14176, contig04831, contig23074, contig06620, contig09924, contig09926, contig03385, contig05156, contig03380, contig25901, contig11229, contig19807, contig08789, contig10365, contig10341, contig10345, contig13408, contig10337, contig13485, contig08774, contig08758, contig19838, contig22871, contig16063, contig16068, contig12782, contig098…
GO:0006730	one-carbon metabolic process	P	0.0392104	0.000560949	18	27	763	3518	over	contig14156, contig08854, contig05283, contig10466, contig06412, contig14010, contig26289, contig22233, contig05670, contig14652, contig03662, contig02995, contig11019, contig02803, contig08904, contig05559, contig01639, contig08021	contig17903, contig25901, contig21728, contig27301, contig03124, contig11348, contig08653, contig08655, contig10449, contig09037, contig07980, contig10517, contig16283, contig26374, contig20966, contig16958, contig08430, contig01542, contig15383, contig14624, contig06954, contig09303, contig05792, contig09344, contig12134, contig06677, contig05514
GO:0043436	oxoacid metabolic process	P	0.0396747	0.000588129	90	271	691	3274	over	contig17677, contig08798, contig08740, contig01921, contig08759, contig16098, contig16045, contig09881, contig02640, contig16202, contig09018, contig18370, contig27166, contig07600, contig17748, contig07621, contig12013, contig07596, contig08619, contig16138, contig06478, contig02539, contig04610, contig19542, contig19602, contig11422, contig08538, contig16277, contig06332, contig12548, contig221…	contig14147, contig23983, contig06649, contig05115, contig18216, contig14163, contig23085, contig24130, contig18209, contig09926, contig25939, contig25986, contig07658, contig13483, contig20503, contig08763, contig16097, contig16068, contig15733, contig09831, contig16048, contig15707, contig01994, contig06589, contig14283, contig24906, contig24907, contig05259, contig14271, contig24221, contig177…
GO:0019752	carboxylic acid metabolic process	P	0.0396747	0.000588129	90	271	691	3274	over	contig17677, contig08798, contig08740, contig01921, contig08759, contig16098, contig16045, contig09881, contig02640, contig16202, contig09018, contig18370, contig27166, contig07600, contig17748, contig07621, contig12013, contig07596, contig08619, contig16138, contig06478, contig02539, contig04610, contig19542, contig19602, contig11422, contig08538, contig16277, contig06332, contig12548, contig221…	contig14147, contig23983, contig06649, contig05115, contig18216, contig14163, contig23085, contig24130, contig18209, contig09926, contig25939, contig25986, contig07658, contig13483, contig20503, contig08763, contig16097, contig16068, contig15733, contig09831, contig16048, contig15707, contig01994, contig06589, contig14283, contig24906, contig24907, contig05259, contig14271, contig24221, contig177…
GO:0042180	cellular ketone metabolic process	P	0.0420438	0.000629607	91	275	690	3270	over	contig17677, contig08798, contig08740, contig01921, contig08759, contig16098, contig16045, contig09881, contig02640, contig16202, contig09018, contig18370, contig27166, contig07600, contig17748, contig07621, contig12013, contig07596, contig08619, contig16138, contig06478, contig02539, contig04610, contig19542, contig19602, contig11422, contig08538, contig16277, contig06332, contig12548, contig221…	contig14147, contig23983, contig06649, contig05115, contig18216, contig14163, contig23085, contig24130, contig18209, contig05187, contig09926, contig25939, contig25986, contig07658, contig13483, contig20503, contig08763, contig16097, contig16068, contig15733, contig09831, contig16048, contig15707, contig01994, contig06589, contig14283, contig24906, contig24907, contig05259, contig14271, contig242…
GO:0009112	nucleobase metabolic process	P	0.0437645	0.00066457	10	9	771	3536	over	contig15795, contig04610, contig06332, contig22233, contig11700, contig02176, contig04375, contig12276, contig05559, contig08021	contig06549, contig11310, contig12894, contig04609, contig14713, contig10517, contig15039, contig19374, contig20240
GO:0032501	multicellular organismal process	P	0.0437645	0.000675235	94	600	687	2945	over	contig04863, contig07721, contig08828, contig07700, contig08853, contig20531, contig01914, contig01921, contig16074, contig01977, contig09006, contig03109, contig24254, contig03151, contig11398, contig07598, contig11326, contig01041, contig12888, contig09074, contig01833, contig16121, contig01883, contig12586, contig16351, contig12595, contig04610, contig06402, contig11463, contig17388, contig085…	contig14955, contig14147, contig14148, contig18249, contig17901, contig05125, contig23097, contig03340, contig18220, contig06622, contig24130, contig04831, contig09902, contig09910, contig18215, contig06620, contig23067, contig09924, contig09926, contig09928, contig27266, contig25939, contig24164, contig11230, contig11227, contig25901, contig17616, contig24141, contig07757, contig07732, contig176…
GO:0023033	signaling pathway	P	0.0440343	0.000686059	26	225	755	3320	over	contig21805, contig05283, contig24254, contig05296, contig12888, contig09772, contig08565, contig09192, contig14010, contig18587, contig26285, contig06246, contig25554, contig14652, contig14609, contig16711, contig25448, contig02889, contig27914, contig07446, contig12115, contig27983, contig24742, contig13398, contig07317, contig22583	contig14147, contig16105, contig23997, contig04893, contig04851, contig05125, contig03338, contig23097, contig23089, contig09902, contig17953, contig06620, contig09924, contig03369, contig09926, contig05167, contig04823, contig27266, contig11230, contig11225, contig13415, contig13409, contig10337, contig08758, contig16063, contig16068, contig09831, contig22829, contig16029, contig16028, contig149…
GO:0043170	macromolecule metabolic process	P	0.045819	0.00075245	261	1416	520	2129	over	contig14156, contig04863, contig14102, contig03033, contig09938, contig03013, contig07700, contig24135, contig08854, contig08852, contig25167, contig21805, contig17683, contig17682, contig23951, contig11273, contig08798, contig07687, contig10356, contig17577, contig15795, contig20531, contig08748, contig11208, contig01921, contig27356, contig16093, contig16057, contig03291, contig15774, contig026…	contig14955, contig14956, contig02616, contig02615, contig17900, contig17903, contig14959, contig03353, contig03351, contig14135, contig18238, contig04885, contig05130, contig22905, contig14939, contig04851, contig18228, contig05125, contig05121, contig14176, contig02606, contig18218, contig23097, contig23089, contig23977, contig23978, contig06623, contig24130, contig04831, contig23081, contig099…
GO:0009310	amine catabolic process	P	0.045819	0.000767111	13	16	768	3529	over	contig02640, contig18370, contig11463, contig06332, contig22115, contig13775, contig05954, contig10610, contig11700, contig02188, contig11996, contig02803, contig05559	contig18216, contig25986, contig12881, contig28597, contig06341, contig07779, contig05953, contig09278, contig13865, contig10080, contig19374, contig00514, contig23211, contig18966, contig12236, contig05514
GO:0048518	positive regulation of biological process	P	0.045819	0.000772011	40	306	741	3239	over	contig09938, contig16074, contig01977, contig05296, contig11326, contig04610, contig11463, contig08557, contig02416, contig06332, contig12515, contig01263, contig11535, contig15033, contig11700, contig20166, contig20173, contig08374, contig09450, contig13894, contig06917, contig02084, contig12486, contig10869, contig02100, contig02106, contig14609, contig15241, contig15246, contig15259, contig042…	contig14955, contig16105, contig14959, contig23997, contig04893, contig05121, contig23097, contig23081, contig09902, contig06620, contig09924, contig09926, contig08789, contig10370, contig13426, contig13415, contig13409, contig13408, contig10337, contig20527, contig10312, contig20503, contig19838, contig22871, contig09831, contig15707, contig01978, contig09846, contig22829, contig12744, contig149…
GO:0006082	organic acid metabolic process	P	0.045819	0.000776241	90	273	691	3272	over	contig17677, contig08798, contig08740, contig01921, contig08759, contig16098, contig16045, contig09881, contig02640, contig16202, contig09018, contig18370, contig27166, contig07600, contig17748, contig07621, contig12013, contig07596, contig08619, contig16138, contig06478, contig02539, contig04610, contig19542, contig19602, contig11422, contig08538, contig16277, contig06332, contig12548, contig221…	contig14147, contig23983, contig06649, contig05115, contig18216, contig14163, contig23085, contig24130, contig18209, contig09926, contig25939, contig25986, contig07658, contig13483, contig20503, contig08763, contig16097, contig16068, contig15733, contig09831, contig16048, contig15707, contig01994, contig06589, contig14283, contig24906, contig24907, contig05259, contig14271, contig24221, contig032…
GO:0048731	system development	P	0.0467905	0.000806856	38	295	743	3250	over	contig07700, contig16074, contig11398, contig07598, contig11326, contig09074, contig16121, contig12595, contig17388, contig08557, contig08565, contig22133, contig22113, contig18587, contig26285, contig20173, contig06172, contig18754, contig16876, contig09450, contig15104, contig25580, contig15346, contig13154, contig15182, contig02084, contig00040, contig06064, contig07446, contig12115, contig279…	contig14147, contig14148, contig17901, contig05125, contig23097, contig03340, contig18220, contig09902, contig09910, contig18215, contig06620, contig23067, contig09926, contig09928, contig24164, contig24141, contig07732, contig13426, contig13415, contig20547, contig13409, contig10312, contig01118, contig19838, contig09831, contig01148, contig05208, contig16029, contig24906, contig24911, contig238…

## Sheet: 2°C low PAR
2°C low PAR
GO-ID	Term	Category	FDR	P-Value	#Test	#Ref	Over/Under	TestSeqs	RefSeqs
GO:0044422	organelle part	C	0.0124958	3.77883e-06	98	1226	over	contig24135, contig08854, contig08852, contig13436, contig01914, contig21796, contig09006, contig18326, contig08701, contig25059, contig11398, contig12800, contig07535, contig13573, contig11326, contig15613, contig09719, contig15618, contig09772, contig09035, contig09049, contig01872, contig23740, contig04621, contig08557, contig20799, contig22115, contig15941, contig13735, contig20900, contig273…	contig14955, contig14956, contig14147, contig18249, contig17901, contig04879, contig03351, contig14153, contig22908, contig14135, contig04885, contig05130, contig05136, contig05115, contig04851, contig18228, contig05125, contig05121, contig14172, contig18216, contig18218, contig03340, contig23089, contig23978, contig06622, contig23085, contig06623, contig04831, contig18209, contig03036, contig099…
GO:0044446	intracellular organelle part	C	0.0124958	3.7803e-06	98	1224	over	contig24135, contig08854, contig08852, contig13436, contig01914, contig21796, contig09006, contig18326, contig08701, contig25059, contig11398, contig12800, contig07535, contig13573, contig11326, contig15613, contig09719, contig15618, contig09772, contig09035, contig09049, contig01872, contig23740, contig04621, contig08557, contig20799, contig22115, contig15941, contig13735, contig20900, contig273…	contig14955, contig14956, contig14147, contig18249, contig17901, contig04879, contig03351, contig14153, contig22908, contig14135, contig04885, contig05130, contig05136, contig05115, contig04851, contig18228, contig05125, contig05121, contig14172, contig18216, contig18218, contig03340, contig23089, contig23978, contig06622, contig23085, contig06623, contig04831, contig18209, contig03036, contig099…
GO:0043234	protein complex	C	0.0401467	3.86935e-05	42	625	over	contig03345, contig04863, contig09938, contig13483, contig19838, contig21796, contig01977, contig25059, contig07535, contig09772, contig04621, contig08556, contig22115, contig14010, contig27379, contig16950, contig10625, contig22233, contig10610, contig15033, contig12392, contig02284, contig20290, contig14652, contig03628, contig06954, contig12435, contig15223, contig05710, contig15241, contig119…	contig14955, contig02615, contig14959, contig17901, contig14153, contig22908, contig04851, contig05121, contig14172, contig03340, contig06622, contig06623, contig04831, contig09902, contig14108, contig14111, contig18215, contig09924, contig09926, contig17929, contig14129, contig05167, contig03385, contig03380, contig17993, contig08830, contig25110, contig23917, contig11259, contig20609, contig241…
GO:0006730	one-carbon metabolic process	P	0.0401467	3.28004e-05	15	30	over	contig14156, contig08854, contig10466, contig08655, contig06412, contig14010, contig22233, contig14652, contig03662, contig02995, contig06954, contig11019, contig02803, contig01639, contig08021	contig17903, contig25901, contig21728, contig27301, contig05283, contig03124, contig11348, contig08653, contig10449, contig09037, contig07980, contig10517, contig16283, contig26374, contig20966, contig16958, contig08430, contig26289, contig01542, contig05670, contig15383, contig14624, contig09303, contig05792, contig09344, contig12134, contig08904, contig05559, contig06677, contig05514

## Sheet: 17°C high PAR
17°C high PAR
GO-ID	Term	Category	FDR	P-Value	#Test	#Ref	#notAnnotTest	#notAnnotRef	Over/Under	TestSeqs	RefSeqs
GO:0009536	plastid	C	1.21322e-14	1.83516e-18	188	180	1116	2842	over	contig02616, contig03345, contig18250, contig05115, contig04863, contig14163, contig05165, contig14115, contig03384, contig08847, contig07742, contig08792, contig13485, contig08754, contig11206, contig01925, contig27356, contig07692, contig08773, contig08759, contig12790, contig16043, contig02680, contig02662, contig05220, contig16202, contig02508, contig24218, contig27166, contig07610, contig047…	contig02615, contig03351, contig14154, contig18209, contig17949, contig11251, contig05195, contig07658, contig08748, contig11212, contig27330, contig01916, contig08774, contig19836, contig01939, contig16093, contig08764, contig03291, contig20598, contig09012, contig04769, contig14247, contig03250, contig14225, contig17827, contig25865, contig13581, contig19063, contig01809, contig20641, contig135…
GO:0005634	nucleus	C	1.13459e-11	3.43242e-15	225	856	1079	2166	over	contig05136, contig05121, contig04831, contig09902, contig23067, contig05167, contig09938, contig27266, contig08830, contig11225, contig24135, contig08854, contig08852, contig10394, contig13436, contig13426, contig07687, contig10354, contig10345, contig22871, contig21796, contig22829, contig16032, contig16208, contig23858, contig24907, contig06549, contig18374, contig14254, contig05296, contig250…	contig14956, contig17901, contig23983, contig03351, contig04885, contig04851, contig18228, contig05125, contig14176, contig02606, contig23089, contig23977, contig23978, contig14167, contig06622, contig06623, contig23081, contig14111, contig14112, contig17953, contig23074, contig06620, contig09924, contig03369, contig23063, contig09926, contig14127, contig03385, contig05156, contig03380, contig051…
GO:0009507	chloroplast	C	1.4867e-10	6.74648e-14	138	130	1166	2892	over	contig03345, contig05115, contig04863, contig14163, contig05165, contig14115, contig03384, contig08847, contig08792, contig13485, contig01925, contig27356, contig08773, contig12790, contig02680, contig02662, contig16202, contig24218, contig07610, contig04788, contig10456, contig21630, contig07578, contig27106, contig11308, contig10411, contig02562, contig02559, contig09074, contig02513, contig018…	contig02615, contig03351, contig14154, contig18209, contig17949, contig11251, contig05195, contig07658, contig08748, contig27330, contig08774, contig19836, contig01939, contig08764, contig03291, contig20598, contig09012, contig04769, contig14247, contig03250, contig25865, contig13581, contig19063, contig01809, contig13585, contig01035, contig15618, contig12098, contig06449, contig01861, contig237…
GO:0034357	photosynthetic membrane	C	6.29627e-06	1.23661e-08	38	19	1266	3003	over	contig03384, contig08847, contig08792, contig13485, contig01925, contig12790, contig02680, contig14092, contig24218, contig07610, contig07641, contig10456, contig02559, contig01894, contig06470, contig25302, contig06404, contig07943, contig17358, contig20900, contig03429, contig12670, contig06177, contig01597, contig07215, contig01529, contig03623, contig00811, contig24607, contig09628, contig155…	contig02615, contig05195, contig03250, contig13581, contig15618, contig01861, contig23768, contig03513, contig02422, contig09203, contig22251, contig13087, contig12486, contig01468, contig21220, contig02889, contig28409, contig13305, contig15407
GO:0009523	photosystem II	C	5.25915e-05	1.90924e-07	18	3	1286	3019	over	contig13485, contig01925, contig02680, contig14092, contig02559, contig06470, contig25302, contig06404, contig17358, contig03429, contig01597, contig07215, contig24607, contig15584, contig04493, contig04491, contig27896, contig04486	contig01861, contig28409, contig13305
GO:0031981	nuclear lumen	C	5.73208e-05	2.16763e-07	81	337	1223	2685	over	contig05121, contig09902, contig08830, contig24135, contig08854, contig08852, contig13436, contig13426, contig10354, contig10345, contig22871, contig25013, contig11369, contig11398, contig11310, contig08653, contig07598, contig10449, contig12888, contig09049, contig09044, contig01872, contig15921, contig04609, contig03585, contig08571, contig05847, contig06333, contig06332, contig22145, contig159…	contig14956, contig03351, contig04851, contig18228, contig14111, contig06620, contig09924, contig03380, contig11251, contig11257, contig07757, contig23951, contig25959, contig13415, contig13408, contig08750, contig10312, contig20519, contig08764, contig16068, contig01148, contig05214, contig12733, contig16013, contig12717, contig24208, contig24911, contig16214, contig23876, contig14247, contig178…
GO:0044422	organelle part	C	6.52293e-05	2.66403e-07	328	996	976	2026	over	contig14955, contig14135, contig05136, contig05115, contig05121, contig04831, contig03036, contig09902, contig05167, contig14115, contig03384, contig08830, contig20605, contig11225, contig24135, contig08854, contig05197, contig08852, contig08847, contig08849, contig07742, contig07732, contig13436, contig08792, contig13426, contig10354, contig17577, contig10345, contig08754, contig01925, contig011…	contig14956, contig14147, contig18249, contig17901, contig04879, contig03351, contig14153, contig22908, contig04885, contig05130, contig04851, contig18228, contig05125, contig14172, contig18216, contig18218, contig03340, contig23089, contig23978, contig06622, contig23085, contig06623, contig18209, contig14108, contig14111, contig14112, contig03394, contig17953, contig26675, contig03035, contig066…
GO:0044446	intracellular organelle part	C	7.57209e-05	3.20706e-07	328	994	976	2028	over	contig14955, contig14135, contig05136, contig05115, contig05121, contig04831, contig03036, contig09902, contig05167, contig14115, contig03384, contig08830, contig20605, contig11225, contig24135, contig08854, contig05197, contig08852, contig08847, contig08849, contig07742, contig07732, contig13436, contig08792, contig13426, contig10354, contig17577, contig10345, contig08754, contig01925, contig011…	contig14956, contig14147, contig18249, contig17901, contig04879, contig03351, contig14153, contig22908, contig04885, contig05130, contig04851, contig18228, contig05125, contig14172, contig18216, contig18218, contig03340, contig23089, contig23978, contig06622, contig23085, contig06623, contig18209, contig14108, contig14111, contig14112, contig03394, contig17953, contig26675, contig03035, contig066…
GO:0009521	photosystem	C	9.0242e-05	4.11643e-07	21	6	1283	3016	over	contig13485, contig01925, contig02680, contig14092, contig02559, contig06470, contig25302, contig06404, contig17358, contig03429, contig01597, contig07215, contig00811, contig24607, contig09628, contig15584, contig08085, contig04493, contig04491, contig27896, contig04486	contig02615, contig01861, contig03513, contig09203, contig28409, contig13305
GO:0009579	thylakoid	C	9.47964e-05	4.73193e-07	48	37	1256	2985	over	contig18250, contig03384, contig08847, contig08792, contig13485, contig01925, contig12790, contig02680, contig14092, contig24218, contig07610, contig07641, contig10456, contig21630, contig27106, contig02559, contig01894, contig06470, contig25302, contig06404, contig07943, contig17358, contig02465, contig20900, contig03429, contig06286, contig05993, contig12670, contig06177, contig01597, contig072…	contig02615, contig05195, contig27330, contig20598, contig03250, contig13581, contig15618, contig01861, contig23768, contig03555, contig03513, contig02422, contig09203, contig13718, contig08471, contig05910, contig22251, contig13087, contig00721, contig24536, contig02095, contig14634, contig12486, contig12435, contig01468, contig21220, contig04207, contig02889, contig04258, contig19190, contig081…
GO:0043233	organelle lumen	C	0.000212457	1.28548e-06	111	412	1193	2610	over	contig05121, contig03036, contig09902, contig03384, contig08830, contig24135, contig08854, contig08852, contig13436, contig13426, contig10354, contig10345, contig22871, contig02680, contig24221, contig25013, contig11369, contig11398, contig04788, contig25866, contig11310, contig08653, contig07598, contig10449, contig12888, contig09049, contig09044, contig01872, contig15921, contig04609, contig046…	contig14956, contig03351, contig04851, contig18228, contig18216, contig03340, contig14111, contig03035, contig06620, contig09924, contig03380, contig11251, contig11257, contig24146, contig07757, contig23951, contig18261, contig25959, contig10365, contig13415, contig13408, contig08750, contig10312, contig20519, contig22883, contig08764, contig16097, contig16068, contig15707, contig01148, contig052…
GO:0070013	intracellular organelle lumen	C	0.000212457	1.28548e-06	111	412	1193	2610	over	contig05121, contig03036, contig09902, contig03384, contig08830, contig24135, contig08854, contig08852, contig13436, contig13426, contig10354, contig10345, contig22871, contig02680, contig24221, contig25013, contig11369, contig11398, contig04788, contig25866, contig11310, contig08653, contig07598, contig10449, contig12888, contig09049, contig09044, contig01872, contig15921, contig04609, contig046…	contig14956, contig03351, contig04851, contig18228, contig18216, contig03340, contig14111, contig03035, contig06620, contig09924, contig03380, contig11251, contig11257, contig24146, contig07757, contig23951, contig18261, contig25959, contig10365, contig13415, contig13408, contig08750, contig10312, contig20519, contig22883, contig08764, contig16097, contig16068, contig15707, contig01148, contig052…
GO:0031974	membrane-enclosed lumen	C	0.000247425	1.57191e-06	114	419	1190	2603	over	contig05121, contig03036, contig09902, contig03384, contig08830, contig24135, contig08854, contig08852, contig13436, contig13426, contig10354, contig10345, contig08754, contig22871, contig02680, contig24221, contig25013, contig11369, contig11398, contig04788, contig25866, contig11310, contig08653, contig07598, contig10449, contig12888, contig09049, contig09044, contig01872, contig15921, contig046…	contig14956, contig03351, contig04851, contig18228, contig18216, contig03340, contig14111, contig03035, contig06620, contig09924, contig03380, contig11251, contig11257, contig24146, contig07757, contig23951, contig18261, contig25959, contig10365, contig13415, contig13408, contig11212, contig08750, contig10312, contig20519, contig22883, contig08764, contig16097, contig16068, contig15707, contig011…
GO:0044435	plastid part	C	0.00028173	1.87508e-06	52	46	1252	2976	over	contig05115, contig14115, contig03384, contig08847, contig08792, contig12790, contig02680, contig10456, contig27106, contig02513, contig01894, contig07906, contig07013, contig07931, contig10553, contig00197, contig05064, contig03481, contig07844, contig07843, contig20900, contig06286, contig05993, contig06207, contig06246, contig12670, contig06177, contig16890, contig08305, contig16816, contig201…	contig05195, contig08748, contig08774, contig19836, contig20598, contig04769, contig14247, contig03250, contig13581, contig15618, contig12098, contig06449, contig23768, contig19591, contig02422, contig09203, contig13718, contig05910, contig22251, contig13027, contig20106, contig13087, contig12375, contig13959, contig02095, contig14634, contig12486, contig10925, contig01468, contig06050, contig014…
GO:0030529	ribonucleoprotein complex	C	0.000347059	2.41487e-06	80	319	1224	2703	over	contig14135, contig08830, contig24135, contig25167, contig07650, contig27356, contig02662, contig14096, contig14254, contig09815, contig08708, contig27076, contig13513, contig20669, contig00499, contig10449, contig10438, contig02562, contig12062, contig06455, contig12054, contig09044, contig28598, contig10553, contig00198, contig05051, contig14806, contig13735, contig02364, contig10656, contig002…	contig03351, contig04885, contig05130, contig18218, contig23978, contig07757, contig23951, contig17654, contig25959, contig24186, contig25169, contig19803, contig12705, contig17596, contig25072, contig13415, contig15795, contig20531, contig00361, contig22883, contig08764, contig15712, contig01148, contig05211, contig15774, contig12740, contig16033, contig12735, contig05214, contig16206, contig052…
GO:0032991	macromolecular complex	C	0.000695267	5.25841e-06	260	797	1044	2225	over	contig14955, contig03345, contig14135, contig05136, contig05121, contig04863, contig04831, contig09902, contig17929, contig05167, contig09938, contig08830, contig25110, contig24135, contig08849, contig25167, contig07742, contig07732, contig08792, contig13426, contig10354, contig07650, contig10345, contig13485, contig01925, contig27356, contig08773, contig22871, contig12790, contig21796, contig026…	contig02615, contig14959, contig17901, contig03351, contig14153, contig22908, contig04885, contig05130, contig04851, contig14172, contig18218, contig03340, contig23978, contig06622, contig06623, contig14108, contig14111, contig18215, contig09924, contig09926, contig14129, contig03385, contig03380, contig17993, contig23917, contig11259, contig20609, contig24146, contig11230, contig11229, contig179…
GO:0044434	chloroplast part	C	0.000711386	5.48792e-06	49	44	1255	2978	over	contig05115, contig14115, contig03384, contig08847, contig08792, contig12790, contig02680, contig10456, contig27106, contig01894, contig07906, contig07013, contig07931, contig10553, contig00197, contig05064, contig03481, contig07844, contig07843, contig20900, contig06286, contig05993, contig06207, contig06246, contig12670, contig06177, contig16890, contig08305, contig16816, contig20187, contig107…	contig05195, contig08748, contig08774, contig19836, contig20598, contig04769, contig14247, contig03250, contig13581, contig15618, contig12098, contig06449, contig23768, contig02422, contig09203, contig13718, contig05910, contig22251, contig13027, contig20106, contig13087, contig12375, contig13959, contig02095, contig14634, contig12486, contig10925, contig01468, contig06050, contig01480, contig212…
GO:0043228	non-membrane-bounded organelle	C	0.0019012	1.86928e-05	169	550	1135	2472	over	contig14135, contig05136, contig09902, contig23067, contig24135, contig17610, contig08854, contig08852, contig21805, contig07742, contig13436, contig13426, contig10354, contig17577, contig07650, contig10345, contig27356, contig02662, contig14096, contig06570, contig18374, contig25013, contig08732, contig11369, contig11383, contig08710, contig08708, contig27076, contig11398, contig13513, contig206…	contig03351, contig22908, contig05130, contig04851, contig18228, contig18218, contig03340, contig23089, contig06622, contig06623, contig14112, contig09924, contig09926, contig14129, contig03380, contig17993, contig11251, contig11257, contig11230, contig17969, contig17978, contig07757, contig23951, contig07746, contig18261, contig17654, contig25959, contig19803, contig12705, contig17596, contig250…
GO:0043232	intracellular non-membrane-bounded organelle	C	0.0019012	1.86928e-05	169	550	1135	2472	over	contig14135, contig05136, contig09902, contig23067, contig24135, contig17610, contig08854, contig08852, contig21805, contig07742, contig13436, contig13426, contig10354, contig17577, contig07650, contig10345, contig27356, contig02662, contig14096, contig06570, contig18374, contig25013, contig08732, contig11369, contig11383, contig08710, contig08708, contig27076, contig11398, contig13513, contig206…	contig03351, contig22908, contig05130, contig04851, contig18228, contig18218, contig03340, contig23089, contig06622, contig06623, contig14112, contig09924, contig09926, contig14129, contig03380, contig17993, contig11251, contig11257, contig11230, contig17969, contig17978, contig07757, contig23951, contig07746, contig18261, contig17654, contig25959, contig19803, contig12705, contig17596, contig250…
GO:0030076	light-harvesting complex	C	0.00201857	2.01521e-05	9	0	1295	3022	over	contig13485, contig01925, contig06404, contig17358, contig03429, contig01597, contig04493, contig04491, contig04486
GO:0005829	cytosol	C	0.00228558	2.35092e-05	181	579	1123	2443	over	contig02616, contig05146, contig14135, contig04863, contig17929, contig05167, contig09938, contig27266, contig08830, contig17623, contig11225, contig21805, contig10354, contig13481, contig22871, contig05224, contig09890, contig14096, contig16208, contig23858, contig24907, contig06549, contig24221, contig05296, contig03151, contig25013, contig24296, contig11369, contig08708, contig27076, contig076…	contig14959, contig23983, contig03351, contig14153, contig23997, contig05130, contig22905, contig04851, contig14176, contig02606, contig18218, contig14167, contig23081, contig17949, contig14109, contig14108, contig26694, contig14112, contig17953, contig23074, contig26675, contig06620, contig06604, contig09924, contig23063, contig14129, contig14130, contig09932, contig03013, contig17641, contig112…
GO:0005623	cell	C	0.0113225	0.000157566	936	2333	368	689	over	contig14955, contig02616, contig05138, contig03344, contig03345, contig16105, contig05146, contig18250, contig14135, contig05126, contig03360, contig05136, contig05115, contig05122, contig05121, contig04863, contig14163, contig14160, contig17943, contig04831, contig03036, contig09902, contig09910, contig06631, contig09914, contig23067, contig17929, contig12796, contig05167, contig05165, contig099…	contig17905, contig14956, contig14147, contig14148, contig02615, contig18249, contig14959, contig17901, contig04879, contig16107, contig23983, contig03351, contig14154, contig14153, contig22908, contig18238, contig04885, contig23997, contig05130, contig04893, contig22905, contig14168, contig04851, contig04854, contig18228, contig05125, contig14172, contig14176, contig02606, contig04869, contig033…
GO:0044464	cell part	C	0.0128995	0.000183414	936	2332	368	690	over	contig14955, contig02616, contig05138, contig03344, contig03345, contig16105, contig05146, contig18250, contig14135, contig05126, contig03360, contig05136, contig05115, contig05122, contig05121, contig04863, contig14163, contig14160, contig17943, contig04831, contig03036, contig09902, contig09910, contig06631, contig09914, contig23067, contig17929, contig12796, contig05167, contig05165, contig099…	contig17905, contig14956, contig14147, contig14148, contig02615, contig18249, contig14959, contig17901, contig04879, contig16107, contig23983, contig03351, contig14154, contig14153, contig22908, contig18238, contig04885, contig23997, contig05130, contig04893, contig22905, contig14168, contig04851, contig04854, contig18228, contig05125, contig14172, contig14176, contig02606, contig04869, contig033…
GO:0005622	intracellular	C	0.0224467	0.000387071	817	2063	487	959	over	contig14955, contig02616, contig03344, contig03345, contig16105, contig05146, contig18250, contig14135, contig03360, contig05136, contig05115, contig05121, contig04863, contig14163, contig14160, contig17943, contig04831, contig03036, contig09902, contig09910, contig09914, contig23067, contig17929, contig12796, contig05167, contig05165, contig09938, contig14115, contig03384, contig07721, contig272…	contig17905, contig14956, contig14147, contig02615, contig18249, contig14959, contig17901, contig04879, contig16107, contig23983, contig03351, contig14154, contig14153, contig22908, contig18238, contig04885, contig23997, contig05130, contig22905, contig14168, contig04851, contig04854, contig18228, contig05125, contig14172, contig14176, contig02606, contig04869, contig03338, contig18216, contig182…
GO:0044436	thylakoid part	C	0.0246144	0.000440757	25	20	1279	3002	over	contig03384, contig08847, contig01925, contig12790, contig02680, contig14092, contig07610, contig07641, contig10456, contig01894, contig06470, contig20900, contig05993, contig12670, contig06177, contig07215, contig01529, contig03623, contig15193, contig24607, contig15584, contig08085, contig00606, contig04445, contig27896	contig05195, contig03250, contig13581, contig15618, contig01861, contig23768, contig03513, contig02422, contig09203, contig05910, contig22251, contig13087, contig14634, contig12486, contig01468, contig21220, contig02889, contig28409, contig15407, contig04912
GO:0044424	intracellular part	C	0.0276224	0.000513925	797	2014	507	1008	over	contig14955, contig02616, contig03344, contig03345, contig16105, contig05146, contig18250, contig14135, contig03360, contig05136, contig05115, contig05121, contig04863, contig14163, contig17943, contig04831, contig03036, contig09902, contig09910, contig09914, contig23067, contig17929, contig12796, contig05167, contig05165, contig09938, contig14115, contig03384, contig07721, contig27266, contig088…	contig17905, contig14956, contig14147, contig02615, contig18249, contig14959, contig17901, contig04879, contig16107, contig23983, contig03351, contig14154, contig14153, contig22908, contig04885, contig23997, contig05130, contig22905, contig14168, contig04851, contig04854, contig18228, contig05125, contig14172, contig14176, contig02606, contig04869, contig03338, contig18216, contig18218, contig033…
GO:0009570	chloroplast stroma	C	0.0370931	0.000706963	21	15	1283	3007	over	contig05115, contig14115, contig03384, contig08847, contig02680, contig10456, contig27106, contig07906, contig07013, contig07931, contig10553, contig05064, contig06286, contig06246, contig06177, contig08305, contig13250, contig07481, contig04323, contig08017, contig27896	contig19836, contig06449, contig02422, contig13718, contig13959, contig06050, contig21220, contig04258, contig19190, contig14339, contig02839, contig28409, contig13348, contig12241, contig06773
GO:0003676	nucleic acid binding	F	0.000803532	6.44187e-06	161	537	1143	2485	over	contig14135, contig05136, contig05121, contig04863, contig09902, contig23067, contig12796, contig27262, contig27266, contig24147, contig11225, contig08852, contig07742, contig10394, contig13426, contig07687, contig07650, contig10345, contig07665, contig01903, contig01906, contig27356, contig21796, contig02662, contig06599, contig14096, contig18374, contig03105, contig09815, contig03284, contig087…	contig17905, contig14956, contig04873, contig06673, contig14156, contig04885, contig18218, contig23089, contig23978, contig09900, contig17949, contig14111, contig14112, contig03033, contig03030, contig04814, contig04823, contig05152, contig03013, contig17969, contig17978, contig17606, contig07757, contig11273, contig25959, contig24186, contig25072, contig10360, contig21728, contig27301, contig134…
GO:0005515	protein binding	F	0.00104612	8.86144e-06	395	1128	909	1894	over	contig03344, contig05121, contig04863, contig04831, contig09902, contig09908, contig09910, contig09914, contig23067, contig05167, contig09938, contig14115, contig07721, contig27266, contig17638, contig08830, contig25110, contig08828, contig17610, contig05197, contig25131, contig08847, contig21805, contig17682, contig07742, contig07732, contig10394, contig13436, contig19802, contig13426, contig087…	contig14956, contig14147, contig02615, contig14959, contig17901, contig06673, contig23983, contig14153, contig22908, contig04885, contig23997, contig22905, contig06649, contig04851, contig18228, contig05125, contig14176, contig03338, contig18218, contig03340, contig23089, contig18220, contig23978, contig06622, contig06623, contig24130, contig14109, contig14108, contig14111, contig17953, contig230…
GO:0016491	oxidoreductase activity	F	0.00166764	1.58919e-05	193	306	1111	2716	over	contig03345, contig02620, contig04863, contig17943, contig03036, contig04836, contig05187, contig17954, contig14115, contig20605, contig08833, contig17964, contig18291, contig17682, contig24189, contig11280, contig17567, contig00366, contig08754, contig11206, contig11208, contig07692, contig08759, contig12790, contig16043, contig06575, contig02632, contig24906, contig16202, contig06549, contig183…	contig17901, contig04879, contig16107, contig23983, contig02628, contig14168, contig06649, contig02606, contig05111, contig14167, contig17944, contig18209, contig17946, contig26694, contig05189, contig03035, contig14127, contig09932, contig19774, contig19776, contig23917, contig11259, contig25939, contig11227, contig05190, contig17974, contig25165, contig26607, contig07672, contig13440, contig087…
GO:0048037	cofactor binding	F	0.0180199	0.00028893	72	95	1232	2927	over	contig05146, contig14163, contig20605, contig11280, contig17567, contig00366, contig10313, contig02682, contig06570, contig06549, contig04761, contig08732, contig00420, contig20722, contig07641, contig25866, contig11308, contig21681, contig02583, contig01084, contig16138, contig04621, contig03562, contig11479, contig07048, contig10553, contig27549, contig10591, contig05863, contig05810, contig125…	contig16107, contig24130, contig23917, contig25939, contig11227, contig25165, contig10391, contig13440, contig10356, contig25986, contig16097, contig16098, contig16068, contig09881, contig22818, contig02640, contig14227, contig17870, contig17748, contig11390, contig04790, contig22085, contig08681, contig10453, contig20641, contig12891, contig06483, contig06488, contig22742, contig09710, contig097…
GO:0016168	chlorophyll binding	F	0.0246144	0.000443066	8	1	1296	3021	over	contig13485, contig02559, contig06404, contig17358, contig01597, contig04493, contig04491, contig04486	contig02615
GO:0015979	photosynthesis	P	1.36716e-06	1.03401e-09	36	14	1268	3008	over	contig03345, contig08847, contig13485, contig01925, contig12790, contig05220, contig14092, contig07610, contig21630, contig10411, contig02559, contig06470, contig25302, contig06404, contig17358, contig28613, contig02465, contig03429, contig06286, contig02334, contig06100, contig01597, contig07215, contig00811, contig05720, contig11073, contig09628, contig25767, contig04368, contig07393, contig049…	contig02615, contig13581, contig15618, contig01861, contig03513, contig09203, contig14054, contig01230, contig13027, contig14634, contig04207, contig08856, contig13305, contig15407
GO:0043170	macromolecule metabolic process	P	1.52491e-06	1.38397e-09	417	1260	887	1762	over	contig14955, contig02616, contig14135, contig05121, contig04863, contig04831, contig09902, contig23067, contig12796, contig09938, contig03384, contig27266, contig08830, contig24135, contig08854, contig08852, contig05194, contig25167, contig21805, contig17682, contig10394, contig13426, contig07687, contig10354, contig17577, contig07650, contig10345, contig07665, contig01903, contig01906, contig134…	contig14956, contig02615, contig17900, contig17903, contig14959, contig03353, contig03351, contig14156, contig18238, contig04885, contig05130, contig22905, contig14939, contig04851, contig18228, contig05125, contig14176, contig02606, contig18218, contig23097, contig23089, contig23977, contig23978, contig06623, contig24130, contig23081, contig09900, contig17949, contig14102, contig14111, contig141…
GO:0044260	cellular macromolecule metabolic process	P	6.29627e-06	1.0824e-08	381	1155	923	1867	over	contig14955, contig02616, contig14135, contig05121, contig04863, contig04831, contig09902, contig23067, contig12796, contig09938, contig03384, contig27266, contig08830, contig24135, contig08854, contig08852, contig25167, contig21805, contig10394, contig13426, contig07687, contig10354, contig17577, contig07650, contig10345, contig07665, contig01903, contig01906, contig13485, contig11208, contig273…	contig14956, contig02615, contig17903, contig14959, contig03351, contig14156, contig18238, contig04885, contig05130, contig22905, contig14939, contig04851, contig18228, contig14176, contig02606, contig18218, contig23097, contig23089, contig23977, contig23978, contig06623, contig24130, contig23081, contig09900, contig17949, contig14102, contig14111, contig14112, contig17953, contig23074, contig179…
GO:0010467	gene expression	P	6.29627e-06	1.17066e-08	210	718	1094	2304	over	contig14955, contig14135, contig05121, contig04863, contig09902, contig23067, contig12796, contig09938, contig27266, contig08830, contig24135, contig08854, contig08852, contig25167, contig10394, contig13426, contig10354, contig17577, contig07650, contig10345, contig27356, contig22829, contig02662, contig14096, contig06570, contig06549, contig14254, contig14219, contig05296, contig25013, contig087…	contig17903, contig03351, contig14156, contig04885, contig05130, contig18228, contig05125, contig18218, contig23978, contig06623, contig24130, contig09900, contig14102, contig14111, contig04814, contig09926, contig14129, contig05156, contig05152, contig03013, contig17993, contig20609, contig24146, contig08850, contig07757, contig23951, contig11273, contig07740, contig11268, contig17654, contig259…
GO:0044275	cellular carbohydrate catabolic process	P	6.29627e-06	1.22282e-08	41	22	1263	3000	over	contig17929, contig17677, contig10355, contig08740, contig04754, contig03116, contig11310, contig10411, contig02583, contig04609, contig04610, contig06339, contig06332, contig15961, contig23603, contig26394, contig03474, contig07855, contig07856, contig07867, contig27386, contig11700, contig10746, contig04172, contig27612, contig25412, contig11910, contig07495, contig07492, contig13206, contig068…	contig14168, contig19774, contig23917, contig05195, contig15689, contig05300, contig09710, contig13694, contig02416, contig20050, contig09283, contig08374, contig19374, contig07153, contig10929, contig05759, contig02106, contig14337, contig10210, contig06896, contig10287, contig12241
GO:0016052	carbohydrate catabolic process	P	1.43092e-05	3.24669e-08	43	26	1261	2996	over	contig17929, contig17677, contig10355, contig08740, contig04754, contig03116, contig11310, contig10411, contig02583, contig04609, contig04610, contig20825, contig06339, contig06332, contig15961, contig23603, contig26394, contig03474, contig07855, contig07856, contig07867, contig27386, contig11700, contig10746, contig13930, contig04172, contig27612, contig25412, contig11910, contig07495, contig074…	contig14168, contig19774, contig23917, contig05195, contig15689, contig05300, contig09710, contig13694, contig02416, contig20050, contig09283, contig08374, contig19374, contig07153, contig03674, contig03673, contig10929, contig05759, contig02106, contig14337, contig10210, contig06896, contig10287, contig12241, contig08039, contig16596
GO:0090304	nucleic acid metabolic process	P	2.69628e-05	6.52556e-08	173	606	1131	2416	over	contig05121, contig04863, contig09902, contig23067, contig12796, contig09938, contig27266, contig08830, contig24135, contig08854, contig08852, contig10394, contig13426, contig07687, contig10354, contig17577, contig10345, contig07665, contig01903, contig01906, contig22829, contig06570, contig06549, contig14254, contig14219, contig05296, contig03151, contig25013, contig08732, contig07600, contig113…	contig14956, contig17903, contig14156, contig04885, contig18228, contig02606, contig23089, contig23977, contig23978, contig06623, contig24130, contig09900, contig14111, contig14112, contig03033, contig09924, contig09926, contig14129, contig05152, contig20609, contig07706, contig17969, contig08850, contig07746, contig25959, contig25169, contig08798, contig21728, contig13415, contig13409, contig217…
GO:0006096	glycolysis	P	3.23642e-05	8.75168e-08	28	11	1276	3011	over	contig17929, contig10355, contig08740, contig04754, contig03116, contig10411, contig06339, contig15961, contig23603, contig26394, contig03474, contig07856, contig07867, contig10746, contig04172, contig27612, contig11910, contig07495, contig07492, contig13206, contig06884, contig11073, contig02030, contig02011, contig04368, contig06678, contig03828, contig04489	contig15689, contig05300, contig09710, contig02416, contig20050, contig07153, contig10929, contig14337, contig10210, contig06896, contig10287
GO:0019320	hexose catabolic process	P	3.23642e-05	9.36541e-08	33	16	1271	3006	over	contig17929, contig17677, contig10355, contig08740, contig04754, contig03116, contig10411, contig02583, contig06339, contig15961, contig23603, contig26394, contig03474, contig07855, contig07856, contig07867, contig27386, contig10746, contig04172, contig27612, contig11910, contig07495, contig07492, contig13206, contig06884, contig11073, contig02030, contig02829, contig02011, contig04368, contig066…	contig05195, contig15689, contig05300, contig09710, contig13694, contig02416, contig20050, contig09283, contig08374, contig07153, contig10929, contig14337, contig10210, contig06896, contig10287, contig12241
GO:0006007	glucose catabolic process	P	3.23642e-05	9.36541e-08	33	16	1271	3006	over	contig17929, contig17677, contig10355, contig08740, contig04754, contig03116, contig10411, contig02583, contig06339, contig15961, contig23603, contig26394, contig03474, contig07855, contig07856, contig07867, contig27386, contig10746, contig04172, contig27612, contig11910, contig07495, contig07492, contig13206, contig06884, contig11073, contig02030, contig02829, contig02011, contig04368, contig066…	contig05195, contig15689, contig05300, contig09710, contig13694, contig02416, contig20050, contig09283, contig08374, contig07153, contig10929, contig14337, contig10210, contig06896, contig10287, contig12241
GO:0006006	glucose metabolic process	P	3.23642e-05	9.79102e-08	47	33	1257	2989	over	contig17929, contig17677, contig10355, contig08740, contig04754, contig03116, contig24221, contig11310, contig10411, contig02583, contig04609, contig04610, contig07048, contig06339, contig06332, contig15961, contig23603, contig26394, contig03474, contig07855, contig07856, contig07867, contig27386, contig01223, contig11700, contig24566, contig06175, contig10746, contig04172, contig11682, contig276…	contig25939, contig05195, contig15689, contig22742, contig05300, contig09710, contig24341, contig13603, contig13694, contig02416, contig06317, contig05001, contig14031, contig20050, contig19738, contig09283, contig12323, contig08374, contig19374, contig07153, contig13180, contig10929, contig02106, contig04264, contig11919, contig14337, contig10210, contig06896, contig10287, contig12241, contig016…
GO:0005996	monosaccharide metabolic process	P	3.74978e-05	1.19113e-07	57	47	1247	2975	over	contig17929, contig25131, contig17677, contig10355, contig13481, contig08740, contig01121, contig04754, contig03116, contig24221, contig11310, contig10411, contig02583, contig04609, contig04610, contig07086, contig07048, contig06339, contig22169, contig06332, contig15961, contig23603, contig26394, contig03474, contig07855, contig07856, contig07867, contig27386, contig01223, contig11700, contig245…	contig08818, contig19774, contig25939, contig05195, contig10457, contig15689, contig22742, contig05300, contig09710, contig24341, contig18462, contig13603, contig13694, contig02416, contig06317, contig05001, contig14031, contig14026, contig20050, contig19738, contig16395, contig09283, contig12323, contig09408, contig08374, contig19374, contig07153, contig06930, contig06931, contig06934, contig069…
GO:0046365	monosaccharide catabolic process	P	5.03559e-05	1.67574e-07	33	17	1271	3005	over	contig17929, contig17677, contig10355, contig08740, contig04754, contig03116, contig10411, contig02583, contig06339, contig15961, contig23603, contig26394, contig03474, contig07855, contig07856, contig07867, contig27386, contig10746, contig04172, contig27612, contig11910, contig07495, contig07492, contig13206, contig06884, contig11073, contig02030, contig02829, contig02011, contig04368, contig066…	contig19774, contig05195, contig15689, contig05300, contig09710, contig13694, contig02416, contig20050, contig09283, contig08374, contig07153, contig10929, contig14337, contig10210, contig06896, contig10287, contig12241
GO:0016043	cellular component organization	P	5.25915e-05	1.83148e-07	140	508	1164	2514	over	contig05136, contig05121, contig04863, contig04831, contig09910, contig05167, contig05165, contig08830, contig11225, contig07742, contig10394, contig13426, contig10354, contig10345, contig08773, contig16074, contig02680, contig22829, contig06570, contig06533, contig18374, contig05296, contig03151, contig08732, contig11369, contig11383, contig27076, contig11398, contig07535, contig25866, contig104…	contig17903, contig14153, contig22908, contig23997, contig22905, contig04851, contig05125, contig14172, contig23097, contig23089, contig06622, contig06623, contig14108, contig14111, contig09924, contig03369, contig23063, contig09926, contig14129, contig03380, contig05152, contig17641, contig17993, contig08816, contig24164, contig20609, contig24146, contig11230, contig17969, contig08850, contig179…
GO:0009059	macromolecule biosynthetic process	P	9.0242e-05	4.22577e-07	186	626	1118	2396	over	contig02616, contig14135, contig05121, contig04863, contig09902, contig23067, contig09938, contig27266, contig08830, contig25167, contig10394, contig13426, contig10354, contig17577, contig07650, contig10345, contig01903, contig01906, contig27356, contig21796, contig02662, contig14096, contig06570, contig06549, contig03151, contig25013, contig08732, contig07600, contig11369, contig27076, contig113…	contig03351, contig05130, contig18228, contig18218, contig23097, contig23089, contig06623, contig24130, contig14102, contig14111, contig04814, contig09926, contig14129, contig05156, contig05152, contig03013, contig25939, contig20609, contig07706, contig17969, contig08850, contig07757, contig23951, contig11273, contig07740, contig11268, contig17654, contig25959, contig19803, contig12705, contig175…
GO:0016070	RNA metabolic process	P	9.17176e-05	4.43951e-07	129	471	1175	2551	over	contig05121, contig04863, contig09902, contig23067, contig12796, contig27266, contig08830, contig24135, contig08854, contig08852, contig10394, contig13426, contig10354, contig17577, contig10345, contig22829, contig06570, contig06549, contig14254, contig14219, contig05296, contig25013, contig08732, contig07600, contig11369, contig27076, contig18388, contig11398, contig08653, contig07598, contig104…	contig17903, contig14156, contig04885, contig23089, contig23978, contig06623, contig09900, contig14111, contig03033, contig09926, contig14129, contig05152, contig20609, contig17969, contig08850, contig25959, contig25169, contig08798, contig21728, contig13415, contig13409, contig10312, contig20519, contig19824, contig01921, contig20503, contig07694, contig20508, contig08760, contig04803, contig098…
GO:0055114	oxidation reduction	P	0.000110371	5.75371e-07	136	180	1168	2842	over	contig03345, contig04863, contig04836, contig05187, contig17954, contig14115, contig20605, contig17964, contig18291, contig17682, contig24189, contig11280, contig17567, contig00366, contig11208, contig10313, contig01925, contig07692, contig08759, contig12790, contig06533, contig24906, contig16202, contig09006, contig09803, contig03151, contig27166, contig20722, contig07610, contig07641, contig216…	contig02615, contig04879, contig23983, contig14168, contig02606, contig14167, contig26694, contig05189, contig03035, contig14127, contig19774, contig19776, contig23917, contig25939, contig11227, contig17974, contig25165, contig13440, contig13415, contig10339, contig01911, contig01918, contig15726, contig03299, contig22818, contig15767, contig02640, contig12715, contig14296, contig04770, contig242…
GO:0034645	cellular macromolecule biosynthetic process	P	0.000110371	5.84327e-07	184	619	1120	2403	over	contig02616, contig14135, contig05121, contig04863, contig09902, contig23067, contig09938, contig27266, contig08830, contig25167, contig10394, contig13426, contig10354, contig17577, contig07650, contig10345, contig01903, contig01906, contig27356, contig21796, contig02662, contig14096, contig06570, contig06549, contig03151, contig25013, contig08732, contig07600, contig11369, contig27076, contig113…	contig03351, contig05130, contig18228, contig18218, contig23097, contig23089, contig06623, contig24130, contig14102, contig14111, contig04814, contig09926, contig14129, contig05156, contig05152, contig03013, contig20609, contig07706, contig17969, contig08850, contig07757, contig23951, contig11273, contig07740, contig11268, contig17654, contig25959, contig19803, contig12705, contig17596, contig087…
GO:0046164	alcohol catabolic process	P	0.000113605	6.18632e-07	34	20	1270	3002	over	contig17929, contig17677, contig10355, contig08740, contig04754, contig03116, contig10411, contig02583, contig06339, contig15961, contig23603, contig26394, contig03474, contig07855, contig07856, contig07867, contig27386, contig10746, contig04172, contig27612, contig25412, contig11910, contig07495, contig07492, contig13206, contig06884, contig11073, contig02030, contig02829, contig02011, contig043…	contig14168, contig19774, contig23917, contig05195, contig15689, contig05300, contig09710, contig13694, contig02416, contig20050, contig09283, contig08374, contig07153, contig10929, contig05759, contig14337, contig10210, contig06896, contig10287, contig12241
GO:0019318	hexose metabolic process	P	0.000122074	6.83217e-07	54	46	1250	2976	over	contig17929, contig25131, contig17677, contig10355, contig13481, contig08740, contig01121, contig04754, contig03116, contig24221, contig11310, contig10411, contig02583, contig04609, contig04610, contig07048, contig06339, contig22169, contig06332, contig15961, contig23603, contig26394, contig03474, contig07855, contig07856, contig07867, contig27386, contig01223, contig11700, contig24566, contig061…	contig08818, contig25939, contig05195, contig10457, contig15689, contig22742, contig05300, contig09710, contig24341, contig18462, contig13603, contig13694, contig02416, contig06317, contig05001, contig14031, contig14026, contig20050, contig19738, contig16395, contig09283, contig12323, contig09408, contig08374, contig19374, contig07153, contig06930, contig06931, contig06934, contig06937, contig131…
GO:0006139	nucleobase, nucleoside, nucleotide and nucleic acid metabolic process	P	0.00028173	1.83985e-06	221	707	1083	2315	over	contig05121, contig04863, contig09902, contig09914, contig23067, contig12796, contig09938, contig27266, contig08830, contig07705, contig24135, contig08854, contig08852, contig10394, contig13426, contig07687, contig10354, contig17567, contig17577, contig10345, contig07665, contig01903, contig01906, contig01121, contig08773, contig22829, contig06570, contig24907, contig06549, contig04765, contig142…	contig14956, contig17903, contig14156, contig04885, contig18228, contig14172, contig02606, contig03340, contig23089, contig23977, contig23978, contig06623, contig24130, contig09900, contig14109, contig14111, contig14112, contig03033, contig06604, contig09924, contig09926, contig09928, contig14129, contig09932, contig05152, contig11251, contig08818, contig11257, contig25939, contig20609, contig077…
GO:0044085	cellular component biogenesis	P	0.00048543	3.4511e-06	93	354	1211	2668	over	contig05136, contig05121, contig04863, contig14160, contig04831, contig08830, contig24135, contig08854, contig08852, contig07742, contig13436, contig13426, contig02680, contig22829, contig06533, contig18374, contig14219, contig05296, contig03151, contig25013, contig11383, contig07535, contig25866, contig07598, contig10449, contig12888, contig06455, contig09772, contig09044, contig15921, contig253…	contig17903, contig14156, contig23997, contig22905, contig04851, contig23097, contig09924, contig09926, contig14129, contig17993, contig20609, contig24146, contig11230, contig17978, contig07757, contig18270, contig25959, contig21728, contig13415, contig13409, contig13408, contig21766, contig00361, contig13442, contig16093, contig15774, contig12744, contig12740, contig14075, contig09870, contig162…
GO:0032502	developmental process	P	0.000548664	3.98365e-06	150	511	1154	2511	over	contig14955, contig04863, contig04831, contig09902, contig09910, contig23067, contig07732, contig13426, contig10345, contig08773, contig16074, contig22829, contig24906, contig14270, contig03107, contig03109, contig03151, contig03288, contig11383, contig08701, contig11398, contig12802, contig10489, contig08656, contig08655, contig07598, contig11326, contig12888, contig01854, contig03168, contig018…	contig14147, contig14148, contig17901, contig05125, contig23097, contig03340, contig23089, contig18220, contig06622, contig18215, contig06620, contig09924, contig09926, contig09928, contig25939, contig24164, contig07700, contig24146, contig11230, contig11227, contig25901, contig17969, contig17616, contig11229, contig24141, contig07757, contig07746, contig19807, contig10370, contig13415, contig205…
GO:0006091	generation of precursor metabolites and energy	P	0.000769051	6.04911e-06	88	106	1216	2916	over	contig17929, contig20605, contig10355, contig13485, contig08740, contig01925, contig08773, contig12790, contig04754, contig03116, contig07610, contig07641, contig11310, contig21630, contig10411, contig11326, contig03048, contig01848, contig02559, contig01084, contig06470, contig04609, contig25302, contig04610, contig06404, contig04628, contig04621, contig08508, contig11436, contig08557, contig173…	contig02615, contig14172, contig03340, contig26694, contig11251, contig11227, contig10359, contig01911, contig01918, contig10312, contig22818, contig01195, contig12715, contig14283, contig24232, contig24217, contig14212, contig11342, contig23804, contig11390, contig26508, contig15689, contig08651, contig13581, contig01847, contig03060, contig15618, contig05300, contig09710, contig09705, contig018…
GO:0006396	RNA processing	P	0.00142456	1.2498e-05	61	252	1243	2770	over	contig04863, contig08830, contig24135, contig08854, contig08852, contig22829, contig14254, contig14219, contig05296, contig18388, contig08653, contig10449, contig02562, contig21681, contig06455, contig07052, contig01366, contig10591, contig06338, contig05051, contig18587, contig05021, contig07882, contig25257, contig10689, contig15897, contig06153, contig14555, contig03770, contig12365, contig107…	contig17903, contig14156, contig04885, contig23978, contig09900, contig09926, contig05152, contig25959, contig25169, contig21728, contig13415, contig20519, contig07694, contig20508, contig04803, contig09830, contig16057, contig01148, contig15774, contig12740, contig05214, contig16206, contig05237, contig09020, contig24208, contig23880, contig16214, contig14247, contig17805, contig14214, contig052…
GO:0007049	cell cycle	P	0.00235938	2.46252e-05	53	223	1251	2799	over	contig04831, contig09938, contig07687, contig10345, contig22871, contig03151, contig25013, contig11369, contig10489, contig08655, contig09772, contig02515, contig09049, contig03594, contig07099, contig06333, contig18507, contig03402, contig07877, contig19639, contig17495, contig16976, contig05904, contig14531, contig05663, contig28047, contig10718, contig09412, contig16879, contig16890, contig094…	contig04851, contig14176, contig02606, contig23097, contig06622, contig14111, contig06620, contig09924, contig23063, contig03385, contig03380, contig05152, contig11230, contig17683, contig25959, contig08789, contig10370, contig13415, contig17571, contig17573, contig13408, contig08750, contig21766, contig20516, contig19838, contig09846, contig12744, contig14075, contig16028, contig24904, contig249…
GO:0007275	multicellular organismal development	P	0.0027584	2.92071e-05	129	438	1175	2584	over	contig14955, contig04863, contig04831, contig09902, contig09910, contig23067, contig07732, contig13426, contig10345, contig08773, contig16074, contig22829, contig24906, contig14270, contig03107, contig03109, contig03151, contig03288, contig11383, contig08701, contig11398, contig12802, contig10489, contig08655, contig07598, contig11326, contig12888, contig01854, contig03168, contig01853, contig090…	contig14147, contig14148, contig17901, contig05125, contig23097, contig03340, contig18220, contig06622, contig18215, contig06620, contig09924, contig09926, contig09928, contig25939, contig24164, contig07700, contig11230, contig11227, contig25901, contig17616, contig24141, contig07757, contig19807, contig10370, contig13415, contig20547, contig13409, contig20531, contig10312, contig20516, contig019…
GO:0006066	alcohol metabolic process	P	0.00402172	4.44087e-05	72	87	1232	2935	over	contig17929, contig17623, contig25131, contig17677, contig10355, contig13481, contig08740, contig01121, contig21796, contig04754, contig03116, contig24221, contig11310, contig10411, contig27243, contig02583, contig04609, contig04610, contig07086, contig07048, contig27591, contig06339, contig22169, contig06332, contig15961, contig22145, contig23603, contig26394, contig03474, contig07855, contig078…	contig18249, contig17901, contig14168, contig09926, contig08818, contig19774, contig23917, contig25939, contig17616, contig05195, contig18264, contig13441, contig01914, contig23870, contig11392, contig12031, contig20655, contig10457, contig15689, contig19961, contig22005, contig22742, contig05300, contig09710, contig12835, contig12037, contig09043, contig24341, contig18462, contig13603, contig136…
GO:0006996	organelle organization	P	0.00533157	6.17642e-05	77	288	1227	2734	over	contig05136, contig04863, contig05165, contig11225, contig07742, contig10394, contig13426, contig10345, contig08773, contig02680, contig06570, contig18374, contig05296, contig08732, contig11369, contig11383, contig27076, contig11398, contig10489, contig01883, contig09772, contig15921, contig10541, contig13687, contig05843, contig15987, contig06333, contig18507, contig16294, contig22228, contig196…	contig17903, contig14153, contig22908, contig04851, contig23089, contig06622, contig06623, contig14108, contig14111, contig09924, contig23063, contig09926, contig14129, contig03380, contig05152, contig17641, contig17993, contig17969, contig08850, contig17978, contig07746, contig13415, contig17571, contig17573, contig13409, contig08750, contig21766, contig20516, contig16093, contig16053, contig019…
GO:0033014	tetrapyrrole biosynthetic process	P	0.00533157	6.25397e-05	22	13	1282	3009	over	contig03345, contig11280, contig08754, contig01923, contig16086, contig05220, contig07578, contig01894, contig07906, contig28613, contig03491, contig27373, contig06100, contig20187, contig07177, contig27613, contig05720, contig25767, contig07393, contig01602, contig28380, contig05531	contig19836, contig14212, contig09043, contig09178, contig12539, contig07847, contig01230, contig18633, contig04136, contig26910, contig08992, contig11879, contig06773
GO:0009791	post-embryonic development	P	0.00533157	6.26412e-05	43	188	1261	2834	over	contig14955, contig04863, contig04831, contig07732, contig03107, contig03109, contig11383, contig10489, contig11326, contig01854, contig01853, contig17388, contig08557, contig19639, contig10656, contig01223, contig11535, contig12617, contig23469, contig01552, contig23400, contig15349, contig06917, contig11647, contig19499, contig02965, contig27648, contig12181, contig11906, contig11967, contig132…	contig17901, contig06620, contig09924, contig11230, contig25901, contig17616, contig10312, contig01921, contig01118, contig20503, contig20508, contig15712, contig15707, contig12744, contig12740, contig24904, contig23870, contig14247, contig14227, contig18334, contig05292, contig14211, contig19868, contig24993, contig11387, contig23112, contig12805, contig17698, contig07540, contig13552, contig135…
GO:0018130	heterocycle biosynthetic process	P	0.00651956	7.88934e-05	34	29	1270	2993	over	contig03345, contig11280, contig08754, contig01923, contig16086, contig05220, contig06549, contig07578, contig01894, contig07906, contig28613, contig03491, contig05064, contig09248, contig27373, contig06100, contig24530, contig10013, contig05670, contig20187, contig14676, contig07177, contig27613, contig09328, contig05720, contig11052, contig25767, contig11184, contig07393, contig13364, contig049…	contig23081, contig19836, contig16098, contig03291, contig09881, contig14212, contig19063, contig21695, contig09043, contig01372, contig09178, contig12539, contig10517, contig09250, contig07847, contig01230, contig05976, contig21428, contig18633, contig06149, contig20164, contig09411, contig04136, contig26910, contig08992, contig11879, contig06773, contig21829, contig08021
GO:0008104	protein localization	P	0.00658573	8.06904e-05	43	186	1261	2836	over	contig05167, contig25110, contig11225, contig22829, contig19901, contig09734, contig03168, contig09074, contig17388, contig05843, contig22149, contig18507, contig16294, contig14011, contig22228, contig19723, contig06200, contig10609, contig07272, contig04043, contig10000, contig10769, contig19326, contig08305, contig09446, contig13964, contig11643, contig13903, contig14609, contig07494, contig074…	contig03338, contig14108, contig17953, contig26675, contig03369, contig09926, contig04823, contig17993, contig24186, contig27330, contig08750, contig20519, contig19823, contig13455, contig08758, contig19838, contig02698, contig12766, contig16013, contig23844, contig09808, contig26568, contig18326, contig24993, contig19888, contig26517, contig12019, contig15672, contig08671, contig08641, contig128…
GO:0033036	macromolecule localization	P	0.00690055	8.66352e-05	61	239	1243	2783	over	contig05121, contig05167, contig25110, contig11225, contig13432, contig19802, contig17577, contig22829, contig14270, contig14251, contig19901, contig09734, contig03168, contig09074, contig17388, contig02478, contig08565, contig05843, contig15987, contig22149, contig18507, contig16294, contig14011, contig22228, contig19723, contig06200, contig10609, contig15897, contig07272, contig04043, contig100…	contig04885, contig03338, contig23097, contig14108, contig17953, contig26675, contig03369, contig09926, contig04823, contig17993, contig07746, contig24186, contig27330, contig08750, contig01914, contig20519, contig19823, contig13455, contig08758, contig19838, contig09830, contig02698, contig16045, contig12766, contig09891, contig16013, contig09020, contig23844, contig09808, contig05283, contig265…
GO:0033013	tetrapyrrole metabolic process	P	0.00865568	0.000113908	23	15	1281	3007	over	contig03345, contig11280, contig08754, contig01923, contig16086, contig05220, contig07578, contig01894, contig07906, contig28613, contig03491, contig27373, contig06100, contig20187, contig07177, contig27613, contig05720, contig25767, contig15584, contig07393, contig01602, contig28380, contig05531	contig18216, contig19836, contig14212, contig09043, contig09178, contig12539, contig07847, contig01230, contig18633, contig04136, contig26910, contig08992, contig11879, contig06773, contig04422
GO:0044282	small molecule catabolic process	P	0.0099388	0.000132359	55	62	1249	2960	over	contig17929, contig17677, contig10355, contig08740, contig04754, contig03116, contig18370, contig04765, contig10411, contig02583, contig28597, contig11463, contig10553, contig06339, contig06341, contig06332, contig15961, contig23603, contig26394, contig03474, contig07855, contig07856, contig07867, contig27386, contig01223, contig13775, contig07779, contig10610, contig11700, contig13865, contig145…	contig14168, contig18216, contig03340, contig19774, contig23917, contig05195, contig24194, contig24182, contig25986, contig16097, contig15707, contig02640, contig22085, contig15689, contig19963, contig12881, contig05300, contig09710, contig04651, contig25387, contig13694, contig08556, contig02416, contig16273, contig22115, contig09226, contig16429, contig20050, contig05954, contig05953, contig092…
GO:0044271	cellular nitrogen compound biosynthetic process	P	0.0099388	0.0001338	112	163	1192	2859	over	contig03345, contig05115, contig04863, contig14163, contig09914, contig11280, contig08754, contig01923, contig08773, contig16086, contig05220, contig16202, contig06549, contig04765, contig03151, contig27166, contig00420, contig11310, contig07578, contig27243, contig03048, contig01894, contig06478, contig02539, contig07906, contig04609, contig18425, contig04610, contig04628, contig07013, contig079…	contig23983, contig06649, contig14172, contig03340, contig23081, contig14109, contig06604, contig09928, contig09932, contig11251, contig24182, contig10359, contig17587, contig15795, contig13483, contig10312, contig19836, contig08763, contig16098, contig16068, contig01165, contig16048, contig03291, contig09881, contig06589, contig14296, contig09018, contig14271, contig24217, contig14212, contig178…
GO:0019685	photosynthesis, dark reaction	P	0.0108064	0.000147115	9	1	1295	3021	over	contig03345, contig08847, contig10411, contig06286, contig02334, contig11073, contig25767, contig04368, contig04937	contig01230
GO:0006779	porphyrin biosynthetic process	P	0.0112426	0.000154753	20	12	1284	3010	over	contig03345, contig08754, contig01923, contig16086, contig05220, contig07578, contig01894, contig07906, contig28613, contig03491, contig27373, contig06100, contig20187, contig27613, contig05720, contig25767, contig07393, contig01602, contig28380, contig05531	contig19836, contig14212, contig09043, contig09178, contig12539, contig01230, contig18633, contig04136, contig26910, contig08992, contig11879, contig06773
GO:0005975	carbohydrate metabolic process	P	0.0132565	0.000190495	98	139	1206	2883	over	contig02616, contig03345, contig17929, contig09936, contig17623, contig08833, contig25131, contig08847, contig17677, contig10355, contig13481, contig13469, contig08740, contig01121, contig01106, contig21796, contig04754, contig03116, contig04761, contig24221, contig25039, contig11310, contig10411, contig02583, contig01084, contig12867, contig04609, contig04610, contig07086, contig20825, contig070…	contig14168, contig23097, contig06643, contig08818, contig19774, contig23917, contig25939, contig05195, contig25912, contig18292, contig13441, contig00371, contig09863, contig03294, contig16053, contig09895, contig09893, contig14283, contig04773, contig10457, contig15689, contig12812, contig21621, contig08626, contig22713, contig16170, contig22742, contig05300, contig09710, contig09060, contig070…
GO:0071704	organic substance metabolic process	P	0.0146348	0.000223584	7	0	1297	3022	over	contig08847, contig10411, contig06286, contig02334, contig11073, contig04368, contig04937
GO:0015977	carbon fixation	P	0.0146348	0.000223584	7	0	1297	3022	over	contig08847, contig10411, contig06286, contig02334, contig11073, contig04368, contig04937
GO:0019253	reductive pentose-phosphate cycle	P	0.0146348	0.000223584	7	0	1297	3022	over	contig08847, contig10411, contig06286, contig02334, contig11073, contig04368, contig04937
GO:0065007	biological regulation	P	0.0147773	0.000227996	266	774	1038	2248	over	contig14955, contig16105, contig05121, contig05107, contig04831, contig09902, contig23067, contig12796, contig09938, contig27266, contig21805, contig07732, contig07730, contig10394, contig13432, contig19802, contig13426, contig17567, contig17577, contig10345, contig00366, contig11206, contig27363, contig22871, contig16074, contig22829, contig06570, contig06575, contig24906, contig06549, contig142…	contig14147, contig17903, contig14959, contig17901, contig23997, contig05130, contig04893, contig22905, contig04851, contig05125, contig14172, contig23097, contig03340, contig23089, contig17944, contig06623, contig24130, contig23081, contig17949, contig26694, contig14111, contig18215, contig17953, contig26675, contig06620, contig09924, contig03369, contig09926, contig09928, contig14127, contig141…
GO:0006778	porphyrin metabolic process	P	0.017753	0.000280726	21	14	1283	3008	over	contig03345, contig08754, contig01923, contig16086, contig05220, contig07578, contig01894, contig07906, contig28613, contig03491, contig27373, contig06100, contig20187, contig27613, contig05720, contig25767, contig15584, contig07393, contig01602, contig28380, contig05531	contig18216, contig19836, contig14212, contig09043, contig09178, contig12539, contig01230, contig18633, contig04136, contig26910, contig08992, contig11879, contig06773, contig04422
GO:0006412	translation	P	0.0185088	0.000299568	89	310	1215	2712	over	contig14135, contig07650, contig27356, contig02662, contig14096, contig25013, contig07600, contig13513, contig19902, contig20669, contig00499, contig10489, contig10438, contig02562, contig01056, contig12062, contig06455, contig01095, contig12054, contig09044, contig28598, contig11463, contig00198, contig14806, contig18587, contig05021, contig19636, contig02364, contig10656, contig00272, contig002…	contig03351, contig05130, contig18218, contig14102, contig04814, contig14129, contig05156, contig03013, contig07757, contig23951, contig11273, contig07740, contig11268, contig17654, contig25959, contig19803, contig12705, contig17596, contig08798, contig25072, contig13415, contig15795, contig20531, contig00361, contig01921, contig22883, contig20503, contig08764, contig08760, contig09830, contig157…
GO:0060255	regulation of macromolecule metabolic process	P	0.0193099	0.000315455	90	312	1214	2710	over	contig05121, contig09902, contig23067, contig09938, contig27266, contig10394, contig13426, contig17577, contig10345, contig22871, contig22829, contig06570, contig06549, contig05296, contig25013, contig08732, contig11369, contig27076, contig13513, contig10466, contig10489, contig07598, contig02562, contig03168, contig01883, contig06455, contig09049, contig01872, contig15921, contig24338, contig070…	contig05130, contig22905, contig06623, contig24130, contig14111, contig06620, contig09924, contig09926, contig14129, contig05156, contig05152, contig03013, contig17993, contig24146, contig11229, contig17654, contig08789, contig21728, contig13409, contig13408, contig10312, contig19824, contig08760, contig16068, contig09830, contig12744, contig12740, contig16028, contig14998, contig12717, contig162…
GO:0019538	protein metabolic process	P	0.0205581	0.000338956	283	811	1021	2211	over	contig14955, contig14135, contig04831, contig09938, contig03384, contig05194, contig25167, contig21805, contig17682, contig10394, contig07650, contig10345, contig13485, contig11208, contig27356, contig22871, contig12782, contig21796, contig22829, contig02662, contig14096, contig06570, contig23858, contig03225, contig03107, contig06508, contig05296, contig17842, contig25013, contig08732, contig076…	contig02615, contig17903, contig14959, contig03353, contig03351, contig18238, contig05130, contig22905, contig14939, contig04851, contig05125, contig14176, contig18218, contig23081, contig17949, contig14102, contig14111, contig17953, contig23074, contig17957, contig06620, contig04814, contig09924, contig23063, contig09926, contig14129, contig17937, contig03385, contig05156, contig03380, contig030…
GO:0050794	regulation of cellular process	P	0.0209771	0.000354862	182	556	1122	2466	over	contig16105, contig05121, contig09902, contig23067, contig09938, contig27266, contig21805, contig07730, contig10394, contig13426, contig17567, contig17577, contig10345, contig00366, contig11206, contig27363, contig22871, contig22829, contig06570, contig06575, contig06549, contig03107, contig04765, contig03109, contig05296, contig03151, contig25013, contig08732, contig24296, contig11369, contig270…	contig14147, contig17903, contig14959, contig17901, contig23997, contig05130, contig04893, contig22905, contig04851, contig05125, contig03340, contig06623, contig24130, contig17949, contig26694, contig14111, contig17953, contig06620, contig09924, contig03369, contig09926, contig14127, contig14129, contig03009, contig03385, contig05156, contig03380, contig05152, contig03013, contig17993, contig241…
GO:0044262	cellular carbohydrate metabolic process	P	0.0209771	0.000355598	74	99	1230	2923	over	contig02616, contig17929, contig17623, contig25131, contig17677, contig10355, contig13481, contig08740, contig01121, contig21796, contig04754, contig03116, contig24221, contig11310, contig10411, contig02583, contig01084, contig04609, contig04610, contig07086, contig07048, contig05857, contig06339, contig22169, contig06332, contig22133, contig15961, contig22145, contig14783, contig23603, contig263…	contig14168, contig23097, contig08818, contig19774, contig23917, contig25939, contig05195, contig18292, contig13441, contig09863, contig03294, contig16053, contig14283, contig10457, contig15689, contig12812, contig21621, contig08626, contig22742, contig05300, contig09710, contig07004, contig24341, contig24300, contig18462, contig18458, contig13603, contig25387, contig19609, contig13694, contig085…
GO:0022402	cell cycle process	P	0.0209771	0.000356355	38	161	1266	2861	over	contig04831, contig09938, contig22871, contig11369, contig10489, contig09772, contig09049, contig03594, contig07099, contig06333, contig18507, contig03402, contig07877, contig19639, contig17495, contig16976, contig05904, contig14531, contig05663, contig10718, contig09412, contig16890, contig09483, contig15349, contig02995, contig19499, contig25448, contig13292, contig11906, contig12113, contig017…	contig04851, contig02606, contig06622, contig14111, contig06620, contig09924, contig23063, contig03380, contig05152, contig08789, contig10370, contig13415, contig17571, contig17573, contig13408, contig08750, contig21766, contig20516, contig19838, contig09846, contig24904, contig24911, contig23876, contig14211, contig26517, contig25059, contig11387, contig12801, contig17698, contig15683, contig156…
GO:0032501	multicellular organismal process	P	0.0209771	0.000358556	170	524	1134	2498	over	contig14955, contig04863, contig04831, contig09902, contig09910, contig23067, contig07721, contig27266, contig08828, contig07732, contig13426, contig10345, contig08773, contig16074, contig22829, contig06570, contig24906, contig14270, contig09006, contig03107, contig04765, contig03109, contig03151, contig03288, contig08732, contig11369, contig11383, contig08710, contig08701, contig11398, contig128…	contig14147, contig14148, contig18249, contig17901, contig05125, contig23097, contig03340, contig18220, contig06622, contig24130, contig18215, contig06620, contig09924, contig09926, contig09928, contig25939, contig24164, contig07700, contig11230, contig11227, contig25901, contig17616, contig08853, contig24141, contig07757, contig17653, contig19807, contig10370, contig13415, contig20547, contig134…
GO:0044267	cellular protein metabolic process	P	0.0230291	0.00040408	248	722	1056	2300	over	contig14955, contig14135, contig04831, contig09938, contig03384, contig25167, contig21805, contig10394, contig07650, contig10345, contig13485, contig11208, contig27356, contig22871, contig12782, contig21796, contig22829, contig02662, contig14096, contig06570, contig03225, contig03107, contig05296, contig17842, contig25013, contig08732, contig07600, contig08708, contig27076, contig04788, contig135…	contig02615, contig17903, contig14959, contig03351, contig18238, contig05130, contig22905, contig14939, contig04851, contig14176, contig18218, contig23081, contig17949, contig14102, contig14111, contig17953, contig23074, contig17957, contig06620, contig04814, contig09924, contig23063, contig09926, contig14129, contig03385, contig05156, contig03380, contig03013, contig07700, contig24146, contig112…
GO:0018298	protein-chromophore linkage	P	0.0246144	0.000443066	8	1	1296	3021	over	contig13485, contig02559, contig06404, contig17358, contig01597, contig04493, contig04491, contig04486	contig02615
GO:0044281	small molecule metabolic process	P	0.0271137	0.000500358	255	460	1049	2562	over	contig05115, contig04863, contig14163, contig05187, contig09914, contig04845, contig17929, contig17623, contig07705, contig08854, contig25131, contig17677, contig10355, contig17567, contig13481, contig08740, contig01121, contig08773, contig08759, contig21796, contig05224, contig09890, contig24906, contig24907, contig16202, contig04754, contig06549, contig03116, contig18370, contig04765, contig242…	contig14147, contig18249, contig17903, contig17901, contig23983, contig14156, contig14168, contig06649, contig14172, contig18216, contig03340, contig23085, contig17944, contig24130, contig18209, contig14109, contig06604, contig09926, contig09928, contig09932, contig11251, contig08818, contig19774, contig23917, contig25939, contig07706, contig11227, contig25901, contig17616, contig05195, contig051…
GO:0019684	photosynthesis, light reaction	P	0.030916	0.00057988	14	7	1290	3015	over	contig13485, contig01925, contig12790, contig02559, contig06470, contig25302, contig06404, contig17358, contig03429, contig01597, contig04493, contig04491, contig27896, contig04486	contig13581, contig15618, contig01861, contig14054, contig13027, contig14634, contig08856
GO:0042254	ribosome biogenesis	P	0.0322495	0.00060977	36	152	1268	2870	over	contig04863, contig14160, contig08830, contig24135, contig08854, contig08852, contig13436, contig14219, contig25013, contig10449, contig12888, contig06455, contig09044, contig03508, contig01366, contig05051, contig13735, contig25257, contig15897, contig14555, contig01552, contig10769, contig28047, contig23400, contig15371, contig06917, contig04173, contig09344, contig13283, contig10234, contig074…	contig14156, contig09926, contig14129, contig07757, contig18270, contig25959, contig21728, contig13415, contig00361, contig15774, contig12744, contig09870, contig05237, contig09020, contig05227, contig16214, contig14247, contig17805, contig05283, contig06510, contig14214, contig11374, contig17886, contig24965, contig08698, contig08699, contig10478, contig08637, contig08636, contig13585, contig097…
GO:0050789	regulation of biological process	P	0.0391249	0.000751605	234	679	1070	2343	over	contig14955, contig16105, contig05121, contig05107, contig04831, contig09902, contig23067, contig09938, contig27266, contig21805, contig07730, contig10394, contig13432, contig13426, contig17567, contig17577, contig10345, contig00366, contig11206, contig27363, contig22871, contig16074, contig22829, contig06570, contig06575, contig06549, contig14270, contig03107, contig04765, contig03109, contig052…	contig14147, contig17903, contig14959, contig17901, contig23997, contig05130, contig04893, contig22905, contig04851, contig05125, contig23097, contig03340, contig06623, contig24130, contig23081, contig17949, contig26694, contig14111, contig18215, contig17953, contig26675, contig06620, contig09924, contig03369, contig09926, contig09928, contig14127, contig14129, contig14130, contig03009, contig033…
GO:0034621	cellular macromolecular complex subunit organization	P	0.0407362	0.00078872	36	151	1268	2871	over	contig05136, contig04831, contig07742, contig13426, contig10354, contig22829, contig06533, contig18374, contig05296, contig11369, contig11383, contig07535, contig09772, contig15921, contig25302, contig10541, contig07099, contig07882, contig01552, contig10000, contig16890, contig06917, contig13192, contig11669, contig11647, contig14323, contig10234, contig07446, contig12128, contig27983, contig111…	contig17903, contig23997, contig09924, contig20609, contig11230, contig17978, contig13409, contig13408, contig21766, contig13442, contig16093, contig12740, contig14075, contig01994, contig16207, contig16210, contig23880, contig14247, contig06510, contig20700, contig11390, contig10481, contig19064, contig10419, contig19969, contig00476, contig16173, contig09714, contig01886, contig05313, contig156…

## Sheet: 17°C low PAR
17°C low PAR
GO-ID	Term	Category	FDR	P-Value	#Test	#Ref	Over/Under	TestSeqs	RefSeqs
GO:0005634	nucleus	C	0.00359678	2.23013e-06	78	1003	over	contig05136, contig05121, contig09902, contig05167, contig09938, contig27266, contig08854, contig13436, contig22871, contig23858, contig18374, contig25013, contig11369, contig08701, contig07530, contig01814, contig03168, contig12087, contig06455, contig02515, contig09755, contig09044, contig23740, contig07035, contig10541, contig08571, contig06338, contig15941, contig05051, contig19639, contig273…	contig14956, contig17901, contig23983, contig03351, contig04885, contig04851, contig18228, contig05125, contig14176, contig02606, contig23089, contig23977, contig23978, contig14167, contig06622, contig06623, contig04831, contig23081, contig14111, contig14112, contig17953, contig23074, contig06620, contig23067, contig09924, contig03369, contig23063, contig09926, contig14127, contig03385, contig051…
GO:0009536	plastid	C	0.0397456	3.60723e-05	66	302	over	contig02616, contig18250, contig14115, contig08847, contig08792, contig07692, contig08773, contig02508, contig24218, contig04788, contig09793, contig02559, contig09074, contig07906, contig07943, contig11422, contig05875, contig02409, contig00197, contig02465, contig12548, contig03489, contig03481, contig01237, contig01236, contig02364, contig20059, contig00270, contig00269, contig00268, contig059…	contig02615, contig03345, contig03351, contig14154, contig05115, contig04863, contig14163, contig18209, contig17949, contig05165, contig03384, contig11251, contig05195, contig07742, contig07658, contig08748, contig11212, contig27330, contig13485, contig08754, contig11206, contig01916, contig01925, contig27356, contig08774, contig19836, contig08759, contig01939, contig16093, contig08764, contig127…
GO:0044260	cellular macromolecule metabolic process	P	0.00170591	2.63794e-07	119	1417	over	contig02616, contig05121, contig09902, contig12796, contig09938, contig27266, contig08854, contig25167, contig17577, contig22871, contig14096, contig25013, contig11369, contig04788, contig20669, contig10466, contig07535, contig27124, contig07570, contig19042, contig09734, contig03168, contig02559, contig12085, contig12062, contig06455, contig09772, contig02515, contig12054, contig09044, contig237…	contig14955, contig14956, contig02615, contig17903, contig14959, contig03351, contig14156, contig14135, contig18238, contig04885, contig05130, contig22905, contig14939, contig04851, contig18228, contig14176, contig02606, contig18218, contig04863, contig23097, contig23089, contig23977, contig23978, contig06623, contig24130, contig04831, contig23081, contig09900, contig17949, contig14102, contig141…
GO:0043170	macromolecule metabolic process	P	0.00211081	9.57865e-07	136	1541	over	contig02616, contig05121, contig09902, contig12796, contig09938, contig27266, contig08854, contig05194, contig25167, contig17577, contig22871, contig14096, contig23858, contig25013, contig11369, contig04788, contig20669, contig10466, contig07535, contig27124, contig07570, contig08645, contig19042, contig21674, contig09734, contig03168, contig02559, contig12085, contig12062, contig06455, contig097…	contig14955, contig14956, contig02615, contig17900, contig17903, contig14959, contig03353, contig03351, contig14156, contig14135, contig18238, contig04885, contig05130, contig22905, contig14939, contig04851, contig18228, contig05125, contig14176, contig02606, contig18218, contig04863, contig23097, contig23089, contig23977, contig23978, contig06623, contig24130, contig04831, contig23081, contig099…
GO:0006139	nucleobase, nucleoside, nucleotide and nucleic acid metabolic process	P	0.00359678	2.7203e-06	64	864	over	contig05121, contig09902, contig12796, contig09938, contig27266, contig08854, contig17577, contig08773, contig25013, contig11369, contig20722, contig10466, contig19042, contig03048, contig06455, contig23770, contig24338, contig23740, contig07048, contig06338, contig10524, contig05055, contig05051, contig09260, contig19639, contig27386, contig20059, contig07793, contig15897, contig26285, contig126…	contig14956, contig17903, contig14156, contig04885, contig18228, contig14172, contig02606, contig04863, contig03340, contig23089, contig23977, contig23978, contig06623, contig24130, contig09900, contig14109, contig14111, contig14112, contig09914, contig03033, contig23067, contig06604, contig09924, contig09926, contig09928, contig14129, contig09932, contig05152, contig11251, contig08818, contig088…
