# Supplementary material for: Transcriptomic Analysis of Acclimation to Temperature and Light Stress in Saccharina latissima (Phaeophyceae)
Source: PLoS One. 2012 Aug 28;7(8):e44342. doi: 10.1371/journal.pone.0044342 (PMC3429442; doi:10.1371/journal.pone.0044342)
Supplement: Table S4 — Full list of regulated ESTs with annotations for all stress conditions. (XLS) [file pone.0044342.s004.xls]

## Sheet: Blatt1
ProbeName	Seq Name	Corrected p-value ( Oneway ANOVA Corrected p-value P <= 0.01 )	Fold change HP 17 vs control	Regulation HP 17 vs control	Fold change HP 2 vs control	Regulation HP 2 vs control	Fold change LP 17 vs control	Regulation LP 17 vs control	Fold change LP 2 vs control	Regulation LP 2 vs control	Best BLAST hit Uniprot	eValue Best BLAST hit Uniprot	Best BLAST hit NCBI nr	eValue Best BLAST hit NCBI nr
CUST_71800_PI422552764	contig00004	0.000578264	2.05464	down	1.14927	up	1.68548	down	1.63608	up	---NA---		---NA---
CUST_71801_PI422552764	contig00004	0.000410633	2.43345	down	1.08963	down	1.9281	down	1.5164	up	---NA---		---NA---
CUST_71802_PI422552764	contig00004	4.941e-06	2.35809	down	1.03768	up	1.85904	down	1.66407	up	---NA---		---NA---
CUST_62401_PI422552764	contig00009	0.000760377	4.37627	down	1.10472	down	1.43645	down	1.04254	down	---NA---		---NA---
CUST_62402_PI422552764	contig00009	0.000292148	5.80964	down	1.07555	up	1.64284	down	1.42336	down	---NA---		---NA---
CUST_62403_PI422552764	contig00009	0.000235533	6.40151	down	1.24158	up	1.27457	down	1.09419	down	---NA---		---NA---
CUST_61870_PI422552764	contig00010	3.52657e-07	5.26875	down	1.03795	up	1.11494	up	1.21435	up	---NA---		---NA---
CUST_61871_PI422552764	contig00010	0.00117767	3.51058	down	1.00766	up	1.07811	up	1.17592	up	---NA---		---NA---
CUST_76456_PI422552764	contig00012	3.63668e-05	2.7403	down	2.22601	down	1.29163	up	2.05501	down	acbg2_chick ame: full=long-chain-fatty-acid-- ligase acsbg2 ame: full=acyl- synthetase bubblegum family member 2	5.73685e-100	long chain acyl-coa synthetase	0
CUST_76457_PI422552764	contig00012	8.69878e-06	3.77602	down	2.79275	down	1.07492	up	2.53017	down	acbg2_chick ame: full=long-chain-fatty-acid-- ligase acsbg2 ame: full=acyl- synthetase bubblegum family member 2	5.73685e-100	long chain acyl-coa synthetase	0
CUST_76458_PI422552764	contig00012	1.12876e-05	3.38359	down	2.72391	down	1.2086	up	2.43542	down	acbg2_chick ame: full=long-chain-fatty-acid-- ligase acsbg2 ame: full=acyl- synthetase bubblegum family member 2	5.73685e-100	long chain acyl-coa synthetase	0
CUST_57592_PI422552764	contig00013	6.01798e-05	8.31743	down	4.67045	down	1.60409	down	2.8674	down	acbg2_chick ame: full=long-chain-fatty-acid-- ligase acsbg2 ame: full=acyl- synthetase bubblegum family member 2	1.09138e-15	long chain acyl-coa synthetase	3.36588e-57
CUST_57593_PI422552764	contig00013	0.000135034	9.00342	down	5.1017	down	1.57878	down	2.88505	down	acbg2_chick ame: full=long-chain-fatty-acid-- ligase acsbg2 ame: full=acyl- synthetase bubblegum family member 2	1.09138e-15	long chain acyl-coa synthetase	3.36588e-57
CUST_57594_PI422552764	contig00013	5.09867e-05	10.3975	down	4.98252	down	1.67192	down	2.82618	down	acbg2_chick ame: full=long-chain-fatty-acid-- ligase acsbg2 ame: full=acyl- synthetase bubblegum family member 2	1.09138e-15	long chain acyl-coa synthetase	3.36588e-57
CUST_57394_PI422552764	contig00015	2.37939e-05	2.24583	down	1.21932	down	1.16734	down	1.33174	down	oxlt_oxafo ame: full=oxalate:formate antiporter short=ofa ame: full=oxalate:formate antiport protein ame: full=oxalate:formate exchange protein	7.75927e-14	major facilitator superfamily mfs_1	4.18263e-76
CUST_57395_PI422552764	contig00015	3.27178e-05	2.14496	down	1.4223	down	1.09611	down	1.40179	down	oxlt_oxafo ame: full=oxalate:formate antiporter short=ofa ame: full=oxalate:formate antiport protein ame: full=oxalate:formate exchange protein	7.75927e-14	major facilitator superfamily mfs_1	4.18263e-76
CUST_56302_PI422552764	contig00020	0.000541119	1.85052	down	1.80041	up	1.20831	down	2.45461	up	---NA---		---NA---
CUST_56303_PI422552764	contig00020	0.000211645	1.53932	down	1.92845	up	1.05103	down	2.57455	up	---NA---		---NA---
CUST_56304_PI422552764	contig00020	0.00033872	1.54471	down	1.76923	up	1.16953	down	2.22951	up	---NA---		---NA---
CUST_55525_PI422552764	contig00021	7.85312e-05	2.76268	up	2.88111	up	1.90101	up	3.11862	up	---NA---		---NA---
CUST_51700_PI422552764	contig00022	0.00103028	1.15195	down	2.0886	down	1.10116	up	1.79237	down	---NA---		---NA---
CUST_50407_PI422552764	contig00024	1.71563e-05	2.0526	up	2.8691	up	1.2139	up	2.04532	up	---NA---		---NA---
CUST_50408_PI422552764	contig00024	2.96429e-05	1.99359	up	2.82211	up	1.11756	up	1.98495	up	---NA---		---NA---
CUST_50409_PI422552764	contig00024	0.000467838	2.02364	up	2.77416	up	1.17056	up	1.62435	up	---NA---		---NA---
CUST_70015_PI422552764	contig00025	0.001155	1.77869	up	2.32948	up	4.37694	up	1.16574	up	---NA---		---NA---
CUST_70017_PI422552764	contig00025	0.000153823	2.79093	up	3.13688	up	5.62932	up	1.26435	up	---NA---		---NA---
CUST_40741_PI422552764	contig00028	0.00398389	2.50197	up	1.16088	down	1.28966	down	1.0816	down	---NA---		---NA---
CUST_40743_PI422552764	contig00028	0.0010666	2.63779	up	1.15026	down	1.30525	down	1.53219	down	---NA---		---NA---
CUST_67767_PI422552764	contig00032	5.85249e-05	1.77211	up	1.69437	up	2.66904	up	2.12086	up	---NA---		conserved unknown protein [Ectocarpus siliculosus]	4.96777e-17
CUST_6662_PI422552764	contig00034	0.00373352	1.3269	down	1.47088	up	2.07571	down	1.09437	up	---NA---		---NA---
CUST_57450_PI422552764	contig00035	6.40875e-05	4.32041	up	1.43925	up	4.46636	up	1.94772	up	---NA---		---NA---
CUST_57397_PI422552764	contig00036	2.16684e-06	1.47424	up	3.74952	up	1.17701	up	3.28454	up	---NA---		---NA---
CUST_57398_PI422552764	contig00036	2.56613e-06	1.5081	up	3.35286	up	1.1745	up	3.31618	up	---NA---		---NA---
CUST_57399_PI422552764	contig00036	2.43767e-06	1.44641	up	3.63741	up	1.18501	up	3.28036	up	---NA---		---NA---
CUST_13704_PI422552764	contig00038	0.00403128	1.455	up	2.57396	down	1.41765	down	1.98881	down	---NA---		---NA---
CUST_78232_PI422552764	contig00040	3.55952e-07	2.50444	up	3.61248	up	1.80919	up	2.28248	up	sera_metja ame: full=d-3-phosphoglycerate dehydrogenase short=pgdh	6.90712e-63	d-3-phosphoglycerate dehydrogenase	0
CUST_78233_PI422552764	contig00040	2.18915e-06	2.53537	up	3.45391	up	1.78403	up	2.33886	up	sera_metja ame: full=d-3-phosphoglycerate dehydrogenase short=pgdh	6.90712e-63	d-3-phosphoglycerate dehydrogenase	0
CUST_78234_PI422552764	contig00040	6.35119e-06	1.85664	up	2.95502	up	1.50727	up	2.14108	up	sera_metja ame: full=d-3-phosphoglycerate dehydrogenase short=pgdh	6.90712e-63	d-3-phosphoglycerate dehydrogenase	0
CUST_61192_PI422552764	contig00041	3.80486e-07	3.64918	up	1.48808	down	2.02203	up	1.38611	down	---NA---		---NA---
CUST_61507_PI422552764	contig00042	0.000555823	4.73148	up	1.19522	up	1.93801	up	1.25494	down	---NA---		---NA---
CUST_61508_PI422552764	contig00042	3.29287e-06	2.59612	up	1.08568	down	1.32559	down	1.50248	down	---NA---		---NA---
CUST_61509_PI422552764	contig00042	0.000351492	5.39736	up	1.19043	up	1.45195	up	1.12037	down	---NA---		---NA---
CUST_74032_PI422552764	contig00051	0.00217384	1.06369	down	2.12346	up	1.34905	up	1.52173	up	apx6_arath ame: full= l-ascorbate peroxidase 6 short= x08	6.42625e-16	l-ascorbate peroxidase	1.857e-112
CUST_74033_PI422552764	contig00051	2.85599e-05	1.14289	down	2.51048	up	1.29258	up	1.58292	up	apx6_arath ame: full= l-ascorbate peroxidase 6 short= x08	6.42625e-16	l-ascorbate peroxidase	1.857e-112
CUST_74034_PI422552764	contig00051	0.000468012	1.47508	up	2.91414	up	1.77066	up	2.22575	up	apx6_arath ame: full= l-ascorbate peroxidase 6 short= x08	6.42625e-16	l-ascorbate peroxidase	1.857e-112
CUST_56959_PI422552764	contig00055	2.29149e-08	1.20888	down	4.2863	down	2.6894	up	5.13521	down	---NA---		---NA---
CUST_78563_PI422552764	contig00058	0.000215538	1.89658	down	2.55669	up	1.21736	up	1.84983	up	eftu_thaps ame: full=elongation factor chloroplastic short=ef-tu	1.25521e-180	elongation factor tu	0
CUST_78564_PI422552764	contig00058	0.000245195	1.81899	down	2.96675	up	1.3419	up	2.14433	up	eftu_thaps ame: full=elongation factor chloroplastic short=ef-tu	1.25521e-180	elongation factor tu	0
CUST_47792_PI422552764	contig00061	0.00178834	2.79028	down	1.34908	down	2.72413	down	2.59506	down	---NA---		---NA---
CUST_41888_PI422552764	contig00062	0.00107436	2.0716	down	1.17732	down	1.78926	down	1.65416	down	---NA---		---NA---
CUST_76492_PI422552764	contig00063	7.50317e-08	2.10693	down	1.15609	down	1.5068	up	2.83403	up	pks37_dicdi ame: full=probable polyketide synthase 37 short=dipks37 includes: ame: full=polyketide synthase stlb includes: ame: full=chalcone synthase stlb ame: full=steely2	6.26272e-54	chalcone stilbene synthase	0
CUST_76493_PI422552764	contig00063	1.90751e-06	2.03834	down	1.63057	down	1.65203	up	3.02851	up	pks37_dicdi ame: full=probable polyketide synthase 37 short=dipks37 includes: ame: full=polyketide synthase stlb includes: ame: full=chalcone synthase stlb ame: full=steely2	6.26272e-54	chalcone stilbene synthase	0
CUST_76494_PI422552764	contig00063	1.99939e-06	2.13783	down	1.29708	down	1.7547	up	2.96899	up	pks37_dicdi ame: full=probable polyketide synthase 37 short=dipks37 includes: ame: full=polyketide synthase stlb includes: ame: full=chalcone synthase stlb ame: full=steely2	6.26272e-54	chalcone stilbene synthase	0
CUST_52645_PI422552764	contig00064	2.61538e-06	4.1733	up	1.03414	down	1.25215	up	1.10348	down	---NA---		---NA---
CUST_52646_PI422552764	contig00064	8.54211e-05	2.29806	up	1.82367	down	1.03894	down	1.57726	down	---NA---		---NA---
CUST_52647_PI422552764	contig00064	0.000177815	2.45138	up	1.38216	down	1.06004	up	1.51296	down	---NA---		---NA---
CUST_45579_PI422552764	contig00068	0.00164292	1.7299	up	2.12018	up	1.04172	up	1.19763	up	---NA---		---NA---
CUST_65380_PI422552764	contig00070	1.83618e-07	6.53292	down	2.18141	up	1.45864	down	1.79824	up	rs11_niteu ame: full=30s ribosomal protein s11	3.36529e-32	30s ribosomal protein s11	2.93462e-50
CUST_65381_PI422552764	contig00070	4.59869e-07	7.10001	down	1.90483	up	1.50666	down	1.68425	up	rs11_niteu ame: full=30s ribosomal protein s11	3.36529e-32	30s ribosomal protein s11	2.93462e-50
CUST_65382_PI422552764	contig00070	3.42214e-06	7.24173	down	1.67442	up	1.4828	down	1.71604	up	rs11_niteu ame: full=30s ribosomal protein s11	3.36529e-32	30s ribosomal protein s11	2.93462e-50
CUST_66546_PI422552764	contig00071	0.000276088	2.00608	up	1.35881	down	1.07924	down	1.15672	down	---NA---		---NA---
CUST_43705_PI422552764	contig00073	1.54776e-10	8.86295	down	2.87032	up	1.20333	down	1.77358	up	---NA---		---NA---
CUST_43706_PI422552764	contig00073	3.67366e-10	8.29345	down	2.90763	up	1.20087	down	1.75778	up	---NA---		---NA---
CUST_43707_PI422552764	contig00073	2.04337e-10	8.52177	down	2.80503	up	1.16527	down	1.7113	up	---NA---		---NA---
CUST_19517_PI422552764	contig00074	2.56488e-05	5.47248	down	1.0682	up	2.40683	down	1.02901	down	---NA---		---NA---
CUST_19518_PI422552764	contig00074	1.02568e-05	6.03528	down	1.05881	down	2.55617	down	1.14903	down	---NA---		---NA---
CUST_19519_PI422552764	contig00074	4.89895e-05	5.08053	down	1.11323	up	2.41008	down	1.02086	down	---NA---		---NA---
CUST_12626_PI422552764	contig00075	1.11386e-07	9.65233	down	1.13734	down	4.66299	down	1.16936	down	---NA---		---NA---
CUST_12627_PI422552764	contig00075	3.69956e-07	6.76159	down	1.50255	up	3.2191	down	1.1591	up	---NA---		---NA---
CUST_12628_PI422552764	contig00075	1.68877e-07	6.40715	down	1.19099	up	3.02209	down	1.34922	up	---NA---		---NA---
CUST_69244_PI422552764	contig00079	6.58094e-06	2.84943	down	1.80516	down	1.10195	down	1.24182	down	---NA---		---NA---
CUST_69245_PI422552764	contig00079	1.96163e-05	3.13763	down	1.82327	down	1.14948	down	1.23543	down	---NA---		---NA---
CUST_69246_PI422552764	contig00079	4.02254e-05	3.01582	down	1.99338	down	1.08892	down	1.16419	down	---NA---		---NA---
CUST_77836_PI422552764	contig00081	2.03878e-05	3.38785	down	1.65691	down	1.12756	up	1.08389	down	---NA---		---NA---
CUST_77837_PI422552764	contig00081	3.91171e-07	3.25787	down	2.08765	down	1.19377	up	1.03569	down	---NA---		---NA---
CUST_77838_PI422552764	contig00081	4.07819e-08	4.98104	down	1.78625	down	1.22671	down	1.11661	down	---NA---		---NA---
CUST_24056_PI422552764	contig00084	0.000553501	1.98667	up	1.21329	down	1.27455	down	2.24632	down	---NA---		---NA---
CUST_24057_PI422552764	contig00084	1.53387e-06	2.00292	up	1.60261	down	1.43012	down	2.45412	down	---NA---		---NA---
CUST_24058_PI422552764	contig00084	0.00117598	2.6825	up	1.49946	down	1.04896	down	2.08695	down	---NA---		---NA---
CUST_20042_PI422552764	contig00085	0.0014714	2.9612	up	1.16737	up	1.58319	up	2.37344	up	---NA---		---NA---
CUST_13706_PI422552764	contig00086	0.000477465	2.44955	down	1.08317	up	1.33952	down	1.79858	up	---NA---		---NA---
CUST_13707_PI422552764	contig00086	0.0037958	2.26522	down	1.17491	up	1.31363	down	1.59816	up	---NA---		---NA---
CUST_77744_PI422552764	contig00088	3.27399e-05	2.22317	down	1.51587	down	1.29265	up	1.67992	down	---NA---		---NA---
CUST_77745_PI422552764	contig00088	0.00322751	2.67019	down	1.54272	down	1.09036	down	2.17937	down	---NA---		---NA---
CUST_64343_PI422552764	contig00089	3.8971e-06	5.88819	down	2.44862	down	1.74245	down	1.51391	down	---NA---		---NA---
CUST_64344_PI422552764	contig00089	1.1829e-05	4.78476	down	2.31052	down	1.65469	down	1.45386	down	---NA---		---NA---
CUST_367_PI422552764	contig00090	1.05246e-06	3.8099	down	1.83556	down	1.60535	down	1.26001	down	---NA---		---NA---
CUST_368_PI422552764	contig00090	1.4346e-05	4.00899	down	1.95148	down	1.73149	down	1.3643	down	---NA---		---NA---
CUST_369_PI422552764	contig00090	5.62745e-05	3.55024	down	2.05569	down	1.51913	down	1.21817	down	---NA---		---NA---
CUST_77440_PI422552764	contig00091	3.62744e-05	4.58595	down	11.11	down	1.38365	down	2.62979	down	---NA---		---NA---
CUST_77441_PI422552764	contig00091	9.53916e-06	4.23026	down	20.064	down	1.29348	down	2.32629	down	---NA---		---NA---
CUST_77442_PI422552764	contig00091	4.53723e-05	4.80063	down	9.51471	down	1.32074	down	2.5207	down	---NA---		---NA---
CUST_8387_PI422552764	contig00094	1.01926e-05	2.16941	up	1.16083	down	1.80379	up	1.05858	up	---NA---		---NA---
CUST_8388_PI422552764	contig00094	9.07473e-05	2.52581	up	1.6588	down	2.18848	up	1.35837	up	---NA---		---NA---
CUST_51703_PI422552764	contig00096	5.35857e-06	3.32572	down	1.40217	up	1.52023	down	2.35897	up	---NA---		---NA---
CUST_51704_PI422552764	contig00096	1.38757e-05	2.46302	down	1.71911	up	1.3476	down	3.00829	up	---NA---		---NA---
CUST_51705_PI422552764	contig00096	4.38745e-08	2.76926	down	1.77239	up	1.16875	down	3.40354	up	---NA---		---NA---
CUST_61015_PI422552764	contig00098	0.000585838	5.01794	down	2.58382	down	2.7951	down	2.42466	down	---NA---		---NA---
CUST_61016_PI422552764	contig00098	6.85209e-05	5.13039	down	2.14952	down	2.5328	down	2.07509	down	---NA---		---NA---
CUST_61017_PI422552764	contig00098	2.13664e-05	5.05034	down	3.07228	down	2.18479	down	2.3143	down	---NA---		---NA---
CUST_25211_PI422552764	contig00103	3.97972e-08	2.32345	up	1.38483	down	1.71304	up	1.49777	down	---NA---		---NA---
CUST_25212_PI422552764	contig00103	6.86582e-07	2.99274	up	1.15807	down	2.07209	up	1.51238	down	---NA---		---NA---
CUST_25213_PI422552764	contig00103	2.78971e-07	2.96381	up	1.32747	down	1.84553	up	1.36777	down	---NA---		---NA---
CUST_7829_PI422552764	contig00114	0.000766533	10.1219	up	3.34449	up	1.85211	up	3.21349	up	---NA---		---NA---
CUST_7830_PI422552764	contig00114	0.000237808	8.9003	up	2.77136	up	1.95541	up	2.70548	up	---NA---		---NA---
CUST_7831_PI422552764	contig00114	1.68441e-05	12.0786	up	4.0451	up	2.05175	up	2.6216	up	---NA---		---NA---
CUST_72011_PI422552764	contig00116	0.000151304	1.02638	up	3.26426	down	1.58467	up	1.62745	down	---NA---		---NA---
CUST_72012_PI422552764	contig00116	0.000201624	1.00871	down	2.46433	down	1.57389	up	1.54773	down	---NA---		---NA---
CUST_73817_PI422552764	contig00117	0.0022756	3.22394	down	3.74397	down	1.0784	up	2.12937	down	---NA---		---NA---
CUST_73818_PI422552764	contig00117	0.000323191	3.73823	down	3.46569	down	1.03631	down	2.17589	down	---NA---		---NA---
CUST_42742_PI422552764	contig00118	0.000155739	3.4623	down	4.04944	down	1.02959	up	2.31942	down	---NA---		---NA---
CUST_42743_PI422552764	contig00118	0.000464607	3.22669	down	3.55065	down	1.07535	up	2.14584	down	---NA---		---NA---
CUST_42744_PI422552764	contig00118	0.000298413	3.55263	down	3.85375	down	1.01277	up	2.17108	down	---NA---		---NA---
CUST_73228_PI422552764	contig00122	0.00422571	1.49289	down	2.27611	down	1.03919	up	1.13434	up	---NA---		---NA---
CUST_61642_PI422552764	contig00123	0.00280533	2.16361	up	1.38198	down	1.61239	up	1.40842	down	---NA---		---NA---
CUST_64948_PI422552764	contig00124	1.92772e-07	1.09048	down	28.9383	up	1.38648	up	10.829	up	---NA---		---NA---
CUST_64949_PI422552764	contig00124	3.44122e-08	1.67373	up	64.8975	up	3.35477	up	36.5132	up	---NA---		---NA---
CUST_64950_PI422552764	contig00124	2.47589e-08	1.78447	up	41.5536	up	2.39834	up	28.0279	up	---NA---		---NA---
CUST_64106_PI422552764	contig00125	0.00421952	2.58885	down	1.04033	down	1.18033	down	1.02684	up	---NA---		---NA---
CUST_64107_PI422552764	contig00125	0.00104483	2.77349	down	1.21401	down	1.14378	down	1.25422	down	---NA---		---NA---
CUST_67171_PI422552764	contig00129	0.00100229	6.13135	up	1.50912	up	1.92165	up	1.13919	up	---NA---		---NA---
CUST_67172_PI422552764	contig00129	5.92958e-09	17.8664	up	1.64795	up	2.23873	up	1.33429	up	---NA---		---NA---
CUST_67173_PI422552764	contig00129	1.02637e-09	10.7432	up	1.52983	up	1.21655	down	1.04756	down	---NA---		---NA---
CUST_48820_PI422552764	contig00130	5.97054e-09	8.21577	down	2.21617	down	1.7146	down	1.45568	down	---NA---		---NA---
CUST_48821_PI422552764	contig00130	1.78124e-09	8.47085	down	2.25752	down	1.77154	down	1.47199	down	---NA---		---NA---
CUST_48822_PI422552764	contig00130	6.03382e-10	8.4876	down	1.99511	down	1.63599	down	1.42289	down	---NA---		---NA---
CUST_28394_PI422552764	contig00139	0.000563035	3.19063	up	1.03311	down	1.34747	up	1.03901	up	---NA---		---NA---
CUST_28395_PI422552764	contig00139	0.0014564	3.38749	up	1.02539	up	1.44384	up	1.11153	up	---NA---		---NA---
CUST_49355_PI422552764	contig00140	0.00291985	2.97885	up	1.40552	up	2.19018	up	1.082	down	---NA---		---NA---
CUST_65300_PI422552764	contig00143	4.48398e-05	4.67798	up	1.96613	up	4.07034	up	2.21786	up	---NA---		---NA---
CUST_78367_PI422552764	contig00144	2.07141e-05	3.66748	up	3.3306	up	1.08228	up	2.0109	up	---NA---		expressed unknown protein [Ectocarpus siliculosus]	6.45114e-34
CUST_78368_PI422552764	contig00144	0.00026909	4.05512	up	3.91811	up	1.26265	up	1.98868	up	---NA---		expressed unknown protein [Ectocarpus siliculosus]	6.45114e-34
CUST_78369_PI422552764	contig00144	5.51644e-05	3.25565	up	3.77461	up	1.10762	up	1.98575	up	---NA---		expressed unknown protein [Ectocarpus siliculosus]	6.45114e-34
CUST_8531_PI422552764	contig00147	0.000445414	3.91361	up	2.70684	up	4.54537	up	1.52359	up	---NA---		---NA---
CUST_8532_PI422552764	contig00147	0.000653406	2.20146	up	1.03046	up	2.61163	up	1.26694	down	---NA---		---NA---
CUST_8533_PI422552764	contig00147	0.00141769	2.57608	up	1.22145	up	3.56753	up	1.1506	down	---NA---		---NA---
CUST_75078_PI422552764	contig00150	4.18573e-05	1.299	up	2.33103	down	1.0102	up	1.46137	down	---NA---		lps-induced tnf-alpha factor	7.61535e-30
CUST_25913_PI422552764	contig00155	0.000135647	1.96609	up	2.14869	down	1.31988	up	1.1056	down	---NA---		---NA---
CUST_66862_PI422552764	contig00156	3.74185e-05	2.88956	down	1.1081	down	2.25165	down	1.2992	down	---NA---		---NA---
CUST_66863_PI422552764	contig00156	0.00319994	2.62511	down	1.33388	down	2.15199	down	1.42101	down	---NA---		---NA---
CUST_66864_PI422552764	contig00156	0.00410868	2.69973	down	1.4102	down	2.14059	down	1.39708	down	---NA---		---NA---
CUST_21366_PI422552764	contig00158	2.7388e-05	1.98899	up	1.06367	up	4.7022	up	1.29723	up	---NA---		---NA---
CUST_21367_PI422552764	contig00158	0.000197861	1.77147	up	1.44153	up	3.97324	up	1.18938	up	---NA---		---NA---
CUST_34600_PI422552764	contig00159	1.21841e-06	3.85951	down	1.30939	down	1.03218	down	1.47654	down	---NA---		---NA---
CUST_34601_PI422552764	contig00159	3.4465e-06	3.81107	down	1.16461	down	1.00245	up	1.38174	down	---NA---		---NA---
CUST_34602_PI422552764	contig00159	5.3207e-07	3.87077	down	1.1928	down	1.05077	down	1.45534	down	---NA---		---NA---
CUST_67702_PI422552764	contig00160	0.000414063	4.48586	up	1.0205	up	3.72511	up	1.34007	down	---NA---		---NA---
CUST_64691_PI422552764	contig00162	0.000504072	1.39819	down	2.08158	up	1.30996	down	1.19546	up	---NA---		---NA---
CUST_64692_PI422552764	contig00162	6.71239e-09	5.06083	down	4.20031	up	1.10253	down	1.69914	up	---NA---		---NA---
CUST_63926_PI422552764	contig00163	9.12044e-05	1.43416	down	1.24382	up	1.40198	down	2.36699	up	---NA---		---NA---
CUST_63927_PI422552764	contig00163	0.000111517	1.20673	down	1.50627	up	1.31168	down	2.66349	up	---NA---		---NA---
CUST_63091_PI422552764	contig00166	0.0021965	1.63138	down	1.68554	down	2.38436	down	1.31682	down	---NA---		---NA---
CUST_63093_PI422552764	contig00166	0.00341972	1.42694	down	1.51038	down	2.29803	down	1.32771	down	---NA---		---NA---
CUST_59478_PI422552764	contig00173	0.000107693	1.03819	up	1.26594	down	2.33179	up	2.80326	up	---NA---		---NA---
CUST_71843_PI422552764	contig00175	5.5445e-06	5.11301	up	1.79175	down	3.09557	up	1.09725	down	---NA---		---NA---
CUST_71844_PI422552764	contig00175	5.6525e-06	1.92059	up	2.78296	down	2.32112	up	2.16837	down	---NA---		---NA---
CUST_72634_PI422552764	contig00177	0.000284901	3.55534	up	1.75001	down	1.27167	up	2.27857	down	---NA---		---NA---
CUST_72635_PI422552764	contig00177	3.93801e-05	2.40361	up	4.60614	down	1.60452	down	3.61689	down	---NA---		---NA---
CUST_72636_PI422552764	contig00177	5.17073e-05	2.71122	up	1.35738	down	1.08128	up	1.84522	down	---NA---		---NA---
CUST_62518_PI422552764	contig00183	3.88732e-05	6.20378	up	2.24354	up	3.35856	up	1.83779	up	---NA---		---NA---
CUST_62519_PI422552764	contig00183	6.13609e-05	3.81268	up	1.21307	up	1.84459	up	1.06843	up	---NA---		---NA---
CUST_69994_PI422552764	contig00184	1.0235e-07	113.94	down	2.63265	down	5.61953	down	1.80165	down	---NA---		---NA---
CUST_69995_PI422552764	contig00184	1.45011e-07	118.048	down	2.33217	down	4.86872	down	1.60111	down	---NA---		---NA---
CUST_69996_PI422552764	contig00184	2.69698e-07	109.618	down	2.30866	down	5.06046	down	1.71885	down	---NA---		---NA---
CUST_78031_PI422552764	contig00197	0.000135426	4.85227	down	1.79695	up	2.24537	down	1.57349	up	acox_syny3 ame: full=apocarotenoid- -oxygenase short=aco ame: full=8 -apo-beta-carotenal -oxygenase ame: full=diox1	6.39805e-68	retinal pigment epithelial membrane protein	2.617e-173
CUST_78032_PI422552764	contig00197	3.9491e-05	2.73813	down	1.92453	up	1.64228	down	1.49609	up	acox_syny3 ame: full=apocarotenoid- -oxygenase short=aco ame: full=8 -apo-beta-carotenal -oxygenase ame: full=diox1	6.39805e-68	retinal pigment epithelial membrane protein	2.617e-173
CUST_78033_PI422552764	contig00197	0.000381534	3.40181	down	1.60828	up	1.86639	down	1.47492	up	acox_syny3 ame: full=apocarotenoid- -oxygenase short=aco ame: full=8 -apo-beta-carotenal -oxygenase ame: full=diox1	6.39805e-68	retinal pigment epithelial membrane protein	2.617e-173
CUST_9818_PI422552764	contig00198	4.2799e-05	2.07039	up	1.76967	down	1.39469	up	1.53736	down	ych4_yeast ame: full= transposon ty5-1 protein ycl074w	1.05419e-08	retrotransposon unclassified	1.79418e-14
CUST_9820_PI422552764	contig00198	2.14483e-05	2.11079	up	1.77034	down	1.43633	up	1.5515	down	ych4_yeast ame: full= transposon ty5-1 protein ycl074w	1.05419e-08	retrotransposon unclassified	1.79418e-14
CUST_67141_PI422552764	contig00199	0.000957457	2.00286	up	1.13143	up	1.08962	up	1.06671	down	polx_tobac ame: full=retrovirus-related pol polyprotein from transposon tnt 1-94 includes: ame: full=protease includes: ame: full=reverse transcriptase includes: ame: full=endonuclease	5.02733e-37	gag-protease-integrase-rt-r polyprotein	2.88364e-46
CUST_67142_PI422552764	contig00199	0.000210133	2.13012	up	1.06096	up	1.30453	up	1.02188	up	polx_tobac ame: full=retrovirus-related pol polyprotein from transposon tnt 1-94 includes: ame: full=protease includes: ame: full=reverse transcriptase includes: ame: full=endonuclease	5.02733e-37	gag-protease-integrase-rt-r polyprotein	2.88364e-46
CUST_67143_PI422552764	contig00199	7.78214e-05	2.0925	up	1.08204	down	1.23958	up	1.07291	down	polx_tobac ame: full=retrovirus-related pol polyprotein from transposon tnt 1-94 includes: ame: full=protease includes: ame: full=reverse transcriptase includes: ame: full=endonuclease	5.02733e-37	gag-protease-integrase-rt-r polyprotein	2.88364e-46
CUST_77776_PI422552764	contig00202	7.81258e-05	21.9122	down	11.5847	down	7.19852	down	2.51727	down	---NA---		---NA---
CUST_77777_PI422552764	contig00202	8.75585e-05	18.9581	down	12.8174	down	7.62209	down	2.53292	down	---NA---		---NA---
CUST_77778_PI422552764	contig00202	0.000133411	18.8919	down	11.4403	down	8.205	down	2.5182	down	---NA---		---NA---
CUST_76852_PI422552764	contig00203	3.23089e-06	34.7357	down	2.72992	down	6.49301	down	1.37138	down	prxv_ascno ame: full=vanadium haloperoxidase ame: full=v-bpo	1.59445e-168	vanadium-dependent iodoperoxidase 3	0
CUST_76853_PI422552764	contig00203	3.92551e-06	33.6062	down	2.64034	down	6.34806	down	1.33471	down	prxv_ascno ame: full=vanadium haloperoxidase ame: full=v-bpo	1.59445e-168	vanadium-dependent iodoperoxidase 3	0
CUST_76854_PI422552764	contig00203	3.99487e-06	33.129	down	2.58138	down	6.68746	down	1.34647	down	prxv_ascno ame: full=vanadium haloperoxidase ame: full=v-bpo	1.59445e-168	vanadium-dependent iodoperoxidase 3	0
CUST_75415_PI422552764	contig00207	5.75398e-06	1.02737	up	2.01081	up	1.17003	up	2.99703	up	---NA---		---NA---
CUST_75416_PI422552764	contig00207	2.50518e-06	1.07835	down	1.85488	up	1.13126	up	2.938	up	---NA---		---NA---
CUST_75417_PI422552764	contig00207	1.15738e-05	1.01632	up	2.00682	up	1.14588	up	2.85774	up	---NA---		---NA---
CUST_61747_PI422552764	contig00213	1.18106e-05	1.57521	down	1.44907	up	1.7202	down	2.18844	up	---NA---		---NA---
CUST_61748_PI422552764	contig00213	4.59885e-06	1.51701	down	1.41539	up	1.74873	down	2.34853	up	---NA---		---NA---
CUST_61749_PI422552764	contig00213	3.40481e-06	1.64413	down	1.45862	up	1.74607	down	2.18819	up	---NA---		---NA---
CUST_54661_PI422552764	contig00218	0.00041322	2.56016	down	1.03695	up	1.56064	down	1.37163	up	---NA---		---NA---
CUST_54662_PI422552764	contig00218	0.00162166	2.673	down	1.10036	up	1.65345	down	1.15864	up	---NA---		---NA---
CUST_70030_PI422552764	contig00220	3.82272e-05	2.33305	up	1.70336	down	1.0919	up	1.38594	down	---NA---		---NA---
CUST_70031_PI422552764	contig00220	0.00139247	2.65249	up	1.36481	down	1.01348	down	2.02161	down	---NA---		---NA---
CUST_70032_PI422552764	contig00220	9.63195e-05	1.72394	up	1.81304	down	1.15253	down	2.0815	down	---NA---		---NA---
CUST_74608_PI422552764	contig00223	2.23061e-07	2.0398	up	1.70417	down	1.64821	up	1.5252	down	bet1_mouse ame: full=bet1 homolog short=mbet1 ame: full=golgi vesicular membrane-trafficking protein p18	1.13156e-10	protein	1.8752e-54
CUST_74609_PI422552764	contig00223	1.63557e-06	2.01509	up	1.4939	down	1.57668	up	1.27009	down	bet1_mouse ame: full=bet1 homolog short=mbet1 ame: full=golgi vesicular membrane-trafficking protein p18	1.13156e-10	protein	1.8752e-54
CUST_51541_PI422552764	contig00230	0.00225869	2.73523	up	1.53821	up	1.3794	up	1.27601	up	y2317_arath ame: full=probable leucine-rich repeat receptor-like protein kinase at2g33170 flags: precursor	5.86363e-27	lrr-gtpase of the roco family	2.57055e-32
CUST_51542_PI422552764	contig00230	4.10516e-05	3.01814	up	1.57389	up	1.67095	up	1.22651	up	y2317_arath ame: full=probable leucine-rich repeat receptor-like protein kinase at2g33170 flags: precursor	5.86363e-27	lrr-gtpase of the roco family	2.57055e-32
CUST_76629_PI422552764	contig00231	0.00189898	2.9161	down	1.52187	down	1.15085	up	2.177	down	ywra_bacsu ame: full=uncharacterized transporter ywra	2.02655e-07	chromate ion transporter family	4.6244e-109
CUST_56350_PI422552764	contig00235	4.92717e-06	2.91748	down	1.17965	up	1.58995	down	1.18617	up	---NA---		methyltransferase type 11	8.55648e-71
CUST_56351_PI422552764	contig00235	6.2908e-06	4.53746	down	1.19403	up	1.38938	down	1.20137	up	---NA---		methyltransferase type 11	8.55648e-71
CUST_56352_PI422552764	contig00235	2.42611e-06	4.20867	down	1.23515	up	1.26508	down	1.13928	up	---NA---		methyltransferase type 11	8.55648e-71
CUST_1342_PI422552764	contig00236	0.000416147	2.87529	up	1.53656	up	1.3635	down	1.0457	down	---NA---		---NA---
CUST_1343_PI422552764	contig00236	0.00120223	2.35658	up	1.22818	up	1.32583	down	1.11141	down	---NA---		---NA---
CUST_1344_PI422552764	contig00236	0.00223149	2.16	up	1.07863	down	1.40094	down	1.21022	down	---NA---		---NA---
CUST_78346_PI422552764	contig00237	0.000240884	6.54627	down	1.90235	down	3.01886	down	1.37638	down	glada_micec ame: full= l-glutamine:3-amino- -dideoxy-scyllo-inosose aminotransferase short= l-glutamine:amino-doi aminotransferase ame: full= gentamicin aminotransferase ii	2.54197e-23	1 family protein	1.6952e-180
CUST_78347_PI422552764	contig00237	0.000207056	9.58241	down	1.8607	down	3.64092	down	1.42778	down	glada_micec ame: full= l-glutamine:3-amino- -dideoxy-scyllo-inosose aminotransferase short= l-glutamine:amino-doi aminotransferase ame: full= gentamicin aminotransferase ii	2.54197e-23	1 family protein	1.6952e-180
CUST_78348_PI422552764	contig00237	0.000178548	10.3547	down	1.73652	down	3.55418	down	1.27234	down	glada_micec ame: full= l-glutamine:3-amino- -dideoxy-scyllo-inosose aminotransferase short= l-glutamine:amino-doi aminotransferase ame: full= gentamicin aminotransferase ii	2.54197e-23	1 family protein	1.6952e-180
CUST_37981_PI422552764	contig00238	9.9901e-06	9.84563	down	1.28111	down	4.16212	down	1.16765	down	---NA---		---NA---
CUST_37982_PI422552764	contig00238	1.86186e-05	9.70285	down	1.18283	down	3.78326	down	1.11554	down	---NA---		---NA---
CUST_37983_PI422552764	contig00238	1.10018e-05	10.0683	down	1.215	down	3.96444	down	1.13908	down	---NA---		---NA---
CUST_70405_PI422552764	contig00240	0.00119597	5.43266	up	2.4846	up	1.52425	up	1.66473	up	tm189_bovin ame: full=transmembrane protein 189	6.18132e-08	ubiquitin-conjugating enzyme	4.50894e-60
CUST_70406_PI422552764	contig00240	6.6373e-06	10.6853	up	6.17058	up	1.97311	up	2.44428	up	tm189_bovin ame: full=transmembrane protein 189	6.18132e-08	ubiquitin-conjugating enzyme	4.50894e-60
CUST_70407_PI422552764	contig00240	1.324e-05	12.5618	up	4.31164	up	2.46667	up	1.9528	up	tm189_bovin ame: full=transmembrane protein 189	6.18132e-08	ubiquitin-conjugating enzyme	4.50894e-60
CUST_40951_PI422552764	contig00243	0.00352021	2.19679	down	2.72538	down	3.7911	down	2.35488	down	---NA---		---NA---
CUST_40952_PI422552764	contig00243	0.00188997	2.08455	down	2.58889	down	3.60569	down	2.62251	down	---NA---		---NA---
CUST_40953_PI422552764	contig00243	0.00421427	2.1461	down	2.80818	down	3.8897	down	2.60297	down	---NA---		---NA---
CUST_37984_PI422552764	contig00245	0.00265099	1.53994	up	3.94884	up	1.17079	up	2.95179	up	---NA---		---NA---
CUST_37986_PI422552764	contig00245	0.00195599	1.38734	up	2.61985	up	1.1244	down	1.99857	up	---NA---		---NA---
CUST_66494_PI422552764	contig00246	0.00198535	2.04204	down	2.84315	down	1.1039	down	1.98888	down	---NA---		---NA---
CUST_72976_PI422552764	contig00256	7.17455e-05	3.95429	up	1.68894	down	1.53018	up	1.09176	down	---NA---		---NA---
CUST_72977_PI422552764	contig00256	5.42862e-05	4.07014	up	2.06607	down	1.52103	up	1.14523	down	---NA---		---NA---
CUST_72978_PI422552764	contig00256	1.76998e-06	2.72507	up	1.11691	down	1.42919	up	1.21051	down	---NA---		---NA---
CUST_76941_PI422552764	contig00257	1.46233e-05	2.58689	up	1.77784	down	1.28798	up	1.01261	up	pats1_dicdi ame: full=probable serine threonine-protein kinase pats1 ame: full=protein associated with the transduction of signal 1	3.02464e-09	lrr-gtpase of the roco family	1.96506e-47
CUST_8696_PI422552764	contig00262	6.84852e-06	1.3081	down	2.36527	up	1.10551	up	5.08243	up	---NA---		---NA---
CUST_8697_PI422552764	contig00262	2.34562e-07	1.29228	down	2.38818	up	1.07022	up	4.902	up	---NA---		---NA---
CUST_8698_PI422552764	contig00262	2.71323e-07	1.20983	down	2.16548	up	1.11902	down	4.37659	up	---NA---		---NA---
CUST_76912_PI422552764	contig00264	1.17104e-06	1.87949	down	1.71448	up	1.35522	down	3.11656	up	---NA---		---NA---
CUST_76913_PI422552764	contig00264	6.3093e-07	2.09836	down	1.82142	up	1.35197	down	3.338	up	---NA---		---NA---
CUST_76914_PI422552764	contig00264	2.21591e-06	1.70577	down	1.77916	up	1.33096	down	3.46139	up	---NA---		---NA---
CUST_54829_PI422552764	contig00266	3.69011e-07	1.62657	down	1.9835	up	1.20797	down	3.95907	up	---NA---		---NA---
CUST_54830_PI422552764	contig00266	1.66111e-07	1.57915	down	2.06611	up	1.19527	down	4.1083	up	---NA---		---NA---
CUST_54831_PI422552764	contig00266	9.2234e-08	1.40863	down	2.23791	up	1.09514	down	4.16032	up	---NA---		---NA---
CUST_68626_PI422552764	contig00267	2.16305e-08	12.1007	down	2.42626	up	1.67313	down	2.14579	up	rk2_odosi ame: full=50s ribosomal protein chloroplastic	1.77258e-51	50s ribosomal protein l2	4.73815e-74
CUST_68627_PI422552764	contig00267	3.60955e-08	11.8457	down	2.4132	up	1.60152	down	2.20536	up	rk2_odosi ame: full=50s ribosomal protein chloroplastic	1.77258e-51	50s ribosomal protein l2	4.73815e-74
CUST_68628_PI422552764	contig00267	1.9129e-08	11.9379	down	2.28152	up	1.64565	down	2.11859	up	rk2_odosi ame: full=50s ribosomal protein chloroplastic	1.77258e-51	50s ribosomal protein l2	4.73815e-74
CUST_73447_PI422552764	contig00268	1.10817e-07	15.0695	down	3.03796	up	1.97214	down	2.01327	up	rk3_thaps ame: full=50s ribosomal protein chloroplastic	3.56336e-64	50s ribosomal protein l3	1.83382e-93
CUST_73448_PI422552764	contig00268	5.74775e-08	16.3895	down	2.63999	up	1.96518	down	2.02228	up	rk3_thaps ame: full=50s ribosomal protein chloroplastic	3.56336e-64	50s ribosomal protein l3	1.83382e-93
CUST_73449_PI422552764	contig00268	1.21508e-07	15.8905	down	2.34174	up	2.03219	down	2.08353	up	rk3_thaps ame: full=50s ribosomal protein chloroplastic	3.56336e-64	50s ribosomal protein l3	1.83382e-93
CUST_77458_PI422552764	contig00269	3.76453e-07	16.2421	down	3.52525	up	2.10483	down	1.76432	up	rk16_porye ame: full=50s ribosomal protein chloroplastic	4.39414e-57	50s ribosomal protein l16	2.179e-102
CUST_77459_PI422552764	contig00269	2.50934e-07	15.9481	down	3.865	up	2.03537	down	1.70922	up	rk16_porye ame: full=50s ribosomal protein chloroplastic	4.39414e-57	50s ribosomal protein l16	2.179e-102
CUST_77460_PI422552764	contig00269	5.08154e-08	15.9804	down	3.4071	up	2.00115	down	1.80909	up	rk16_porye ame: full=50s ribosomal protein chloroplastic	4.39414e-57	50s ribosomal protein l16	2.179e-102
CUST_73120_PI422552764	contig00270	4.15614e-08	13.2749	down	2.4469	up	2.01112	down	1.80397	up	rk5_heta2 ame: full=50s ribosomal protein chloroplastic	1.07357e-57	50s ribosomal protein l5	5.33954e-82
CUST_73121_PI422552764	contig00270	1.11386e-07	13.0372	down	2.38517	up	2.00023	down	1.89491	up	rk5_heta2 ame: full=50s ribosomal protein chloroplastic	1.07357e-57	50s ribosomal protein l5	5.33954e-82
CUST_73122_PI422552764	contig00270	1.38205e-08	12.362	down	2.69274	up	1.8075	down	2.24661	up	rk5_heta2 ame: full=50s ribosomal protein chloroplastic	1.07357e-57	50s ribosomal protein l5	5.33954e-82
CUST_66037_PI422552764	contig00271	8.79041e-08	7.9349	down	1.97304	down	1.26525	down	2.44775	down	---NA---		---NA---
CUST_66038_PI422552764	contig00271	3.41891e-08	8.3278	down	1.38731	down	1.48688	down	1.93651	down	---NA---		---NA---
CUST_66039_PI422552764	contig00271	3.43447e-07	6.08545	down	1.37455	down	1.51821	down	1.6601	down	---NA---		---NA---
CUST_47143_PI422552764	contig00272	8.79041e-08	9.61197	down	2.64451	up	1.6733	down	2.04621	up	rr8_thaps ame: full=30s ribosomal protein chloroplastic	3.33487e-41	30s ribosomal protein s8	3.21187e-64
CUST_47144_PI422552764	contig00272	3.07222e-08	9.67748	down	2.60426	up	1.65197	down	2.04186	up	rr8_thaps ame: full=30s ribosomal protein chloroplastic	3.33487e-41	30s ribosomal protein s8	3.21187e-64
CUST_47145_PI422552764	contig00272	8.60959e-08	11.1097	down	2.53247	up	1.76474	down	1.9323	up	rr8_thaps ame: full=30s ribosomal protein chloroplastic	3.33487e-41	30s ribosomal protein s8	3.21187e-64
CUST_37610_PI422552764	contig00273	0.00283682	1.02265	up	2.95222	up	1.42762	down	1.25561	up	rl6_nosp7 ame: full=50s ribosomal protein l6	7.25414e-43	50s ribosomal protein l6	1.02874e-70
CUST_37611_PI422552764	contig00273	0.0019296	1.04663	up	2.92912	up	1.1832	up	1.22081	up	rl6_nosp7 ame: full=50s ribosomal protein l6	7.25414e-43	50s ribosomal protein l6	1.02874e-70
CUST_55915_PI422552764	contig00274	1.45209e-05	1.83218	down	1.99964	up	1.57309	down	3.2349	up	---NA---		---NA---
CUST_55916_PI422552764	contig00274	0.000307695	1.07357	up	1.78046	up	1.12313	down	2.61577	up	---NA---		---NA---
CUST_55917_PI422552764	contig00274	0.000235828	1.24014	down	1.98276	up	1.27787	down	2.75414	up	---NA---		---NA---
CUST_54574_PI422552764	contig00275	7.65966e-05	1.39966	up	2.59738	up	1.42012	up	5.03238	up	---NA---		---NA---
CUST_54575_PI422552764	contig00275	3.96606e-05	1.49872	up	2.2751	up	2.10473	up	6.21759	up	---NA---		---NA---
CUST_5041_PI422552764	contig00276	8.38121e-07	2.65452	down	1.99201	up	1.69442	down	3.06688	up	---NA---		---NA---
CUST_5042_PI422552764	contig00276	9.46051e-07	2.6049	down	2.24685	up	1.56142	down	3.5413	up	---NA---		---NA---
CUST_5043_PI422552764	contig00276	1.76856e-06	2.72678	down	2.06727	up	1.68184	down	3.13576	up	---NA---		---NA---
CUST_48198_PI422552764	contig00278	0.00250648	2.38272	up	1.38189	up	1.4472	up	2.97855	up	---NA---		---NA---
CUST_18359_PI422552764	contig00280	0.000570427	4.02467	up	3.35948	up	1.08271	down	1.2855	up	---NA---		---NA---
CUST_18361_PI422552764	contig00280	0.00421889	4.60339	up	2.07992	up	1.64178	up	1.17285	up	---NA---		---NA---
CUST_70903_PI422552764	contig00282	0.000569622	2.79179	down	2.10755	down	1.60662	down	2.19683	down	nagt1_danre ame: full=sodium-dependent glucose transporter 1	1.99089e-09	major facilitator superfamily sugar transporter	2.28132e-14
CUST_70904_PI422552764	contig00282	0.000269766	2.72474	down	2.15199	down	1.63232	down	2.23562	down	nagt1_danre ame: full=sodium-dependent glucose transporter 1	1.99089e-09	major facilitator superfamily sugar transporter	2.28132e-14
CUST_70905_PI422552764	contig00282	0.000152889	2.7712	down	2.20187	down	1.6899	down	2.35804	down	nagt1_danre ame: full=sodium-dependent glucose transporter 1	1.99089e-09	major facilitator superfamily sugar transporter	2.28132e-14
CUST_73675_PI422552764	contig00289	1.99487e-05	2.67378	down	60.1048	down	1.11413	up	23.2381	down	---NA---		---NA---
CUST_73676_PI422552764	contig00289	2.1905e-05	2.60147	down	41.2897	down	1.10507	up	19.8648	down	---NA---		---NA---
CUST_73677_PI422552764	contig00289	2.68949e-05	3.30007	down	27.2207	down	1.00692	down	16.125	down	---NA---		---NA---
CUST_50608_PI422552764	contig00294	0.00062942	3.06029	down	1.66365	down	1.08513	down	1.13478	down	---NA---		---NA---
CUST_50609_PI422552764	contig00294	0.00225222	3.16097	down	1.50778	down	1.00378	up	1.02995	up	---NA---		---NA---
CUST_50610_PI422552764	contig00294	0.00186548	3.35094	down	1.62503	down	1.18586	down	1.1398	down	---NA---		---NA---
CUST_69256_PI422552764	contig00295	0.000528213	2.96078	down	1.35145	down	1.19397	down	1.11825	down	---NA---		---NA---
CUST_36550_PI422552764	contig00299	6.56205e-06	4.85552	down	1.21322	up	3.07707	down	1.3083	up	---NA---		---NA---
CUST_36551_PI422552764	contig00299	0.000284624	3.76579	down	1.36615	up	3.25021	down	1.00737	down	---NA---		---NA---
CUST_36552_PI422552764	contig00299	7.52406e-06	1.70013	down	3.2554	up	1.69126	down	2.58637	up	---NA---		---NA---
CUST_4773_PI422552764	contig00301	0.000219342	3.05205	down	1.5795	down	1.2008	down	1.18927	down	---NA---		---NA---
CUST_4774_PI422552764	contig00301	0.000477481	3.22569	down	1.55448	down	1.23457	down	1.18346	down	---NA---		---NA---
CUST_4775_PI422552764	contig00301	0.000324307	3.13028	down	1.52654	down	1.19822	down	1.1718	down	---NA---		---NA---
CUST_2490_PI422552764	contig00302	1.36744e-05	3.15952	down	1.37769	down	1.33868	down	1.25525	down	---NA---		---NA---
CUST_2491_PI422552764	contig00302	1.46266e-05	3.23249	down	1.45091	down	1.39299	down	1.30764	down	---NA---		---NA---
CUST_2492_PI422552764	contig00302	1.86264e-05	3.04212	down	1.40171	down	1.31	down	1.24631	down	---NA---		---NA---
CUST_1_PI422552764	contig00305	1.49722e-07	7.84335	down	1.02347	up	2.08021	down	1.31446	down	---NA---		---NA---
CUST_2_PI422552764	contig00305	3.04763e-07	7.76206	down	1.01198	down	2.00995	down	1.25922	down	---NA---		---NA---
CUST_3_PI422552764	contig00305	1.54039e-07	8.02599	down	1.01362	up	1.97411	down	1.26023	down	---NA---		---NA---
CUST_45580_PI422552764	contig00306	7.50315e-05	2.79031	down	1.82667	up	1.33627	down	1.90317	up	---NA---		---NA---
CUST_45582_PI422552764	contig00306	0.00129795	1.77062	down	1.97807	up	1.46054	up	3.25621	up	---NA---		---NA---
CUST_42262_PI422552764	contig00307	3.84533e-09	8.19756	down	2.52936	up	1.91396	down	2.31151	up	---NA---		---NA---
CUST_42263_PI422552764	contig00307	3.83447e-09	9.45877	down	2.38029	up	1.70321	down	2.495	up	---NA---		---NA---
CUST_42264_PI422552764	contig00307	1.33542e-08	6.83252	down	2.31075	up	2.03761	down	2.37081	up	---NA---		---NA---
CUST_36897_PI422552764	contig00308	0.000138481	1.70649	up	3.40358	up	1.52258	up	7.19736	up	---NA---		---NA---
CUST_61750_PI422552764	contig00313	0.000591689	1.28255	down	2.29378	down	1.25843	down	1.39188	down	---NA---		---NA---
CUST_43282_PI422552764	contig00317	8.45905e-08	4.4208	down	2.13703	down	1.08357	down	1.55469	down	---NA---		---NA---
CUST_43283_PI422552764	contig00317	4.82727e-08	4.9906	down	2.40807	down	1.07483	down	1.6647	down	---NA---		---NA---
CUST_43284_PI422552764	contig00317	2.53886e-08	4.65892	down	2.32756	down	1.17978	down	1.76957	down	---NA---		---NA---
CUST_12180_PI422552764	contig00318	0.000598221	2.02655	up	1.06876	down	1.07329	down	2.43678	down	---NA---		---NA---
CUST_12181_PI422552764	contig00318	0.00284055	1.60456	up	1.47401	down	1.31736	down	2.44633	down	---NA---		---NA---
CUST_78349_PI422552764	contig00320	7.06459e-07	4.59877	down	5.28522	up	1.48083	down	2.04974	up	zupt_oceih ame: full=zinc transporter zupt	4.04846e-37	protein	2.45472e-62
CUST_78350_PI422552764	contig00320	6.10437e-11	9.17517	down	5.27573	up	2.01741	down	2.5456	up	zupt_oceih ame: full=zinc transporter zupt	4.04846e-37	protein	2.45472e-62
CUST_78351_PI422552764	contig00320	6.26066e-10	7.15991	down	4.7519	up	1.78445	down	2.66588	up	zupt_oceih ame: full=zinc transporter zupt	4.04846e-37	protein	2.45472e-62
CUST_73297_PI422552764	contig00324	1.40973e-06	1.3564	up	1.59136	down	2.84522	up	3.36574	down	---NA---		---NA---
CUST_73298_PI422552764	contig00324	2.10661e-08	1.41581	up	1.82685	down	2.28172	up	4.76131	down	---NA---		---NA---
CUST_73299_PI422552764	contig00324	1.18874e-06	1.27712	up	1.71002	down	2.51837	up	4.45613	down	---NA---		---NA---
CUST_8887_PI422552764	contig00325	0.00109067	2.69191	up	1.76687	down	1.22793	up	2.52852	up	---NA---		---NA---
CUST_69232_PI422552764	contig00328	1.18231e-07	3.32037	up	1.08704	up	2.24416	up	1.13958	down	---NA---		---NA---
CUST_14837_PI422552764	contig00335	6.12493e-06	4.59774	down	2.28901	down	2.08181	down	1.53698	down	---NA---		---NA---
CUST_14838_PI422552764	contig00335	0.000153147	3.63758	down	1.7692	down	1.7955	down	1.3614	down	---NA---		---NA---
CUST_14839_PI422552764	contig00335	3.24388e-05	4.25809	down	1.82413	down	1.97039	down	1.5366	down	---NA---		---NA---
CUST_37987_PI422552764	contig00337	5.06538e-06	5.8358	down	1.56399	down	1.93522	down	1.87901	down	---NA---		---NA---
CUST_37988_PI422552764	contig00337	4.44704e-07	5.69848	down	1.43243	down	1.80832	down	1.72921	down	---NA---		---NA---
CUST_37989_PI422552764	contig00337	7.17424e-07	5.31491	down	1.40862	down	1.73151	down	1.6872	down	---NA---		---NA---
CUST_16293_PI422552764	contig00344	0.000746275	3.43016	down	6.76486	down	1.55645	down	3.36352	down	---NA---		---NA---
CUST_16294_PI422552764	contig00344	0.00175731	2.58528	down	3.04463	down	1.1352	down	2.4853	down	---NA---		---NA---
CUST_10686_PI422552764	contig00346	0.00367317	2.44558	up	1.13536	down	2.30069	up	1.31546	down	---NA---		---NA---
CUST_16626_PI422552764	contig00354	1.24137e-05	1.84207	down	2.29591	down	1.14122	up	1.82571	down	---NA---		---NA---
CUST_16627_PI422552764	contig00354	5.97732e-06	1.81062	down	2.1819	down	1.16882	up	1.78524	down	---NA---		---NA---
CUST_62437_PI422552764	contig00358	0.000370639	2.08017	up	1.07362	down	1.57233	up	1.05713	up	---NA---		---NA---
CUST_78481_PI422552764	contig00364	2.11495e-07	9.81914	up	1.13918	up	8.34237	up	1.28767	down	mera_staes ame: full=mercuric reductase ame: full=hg reductase	6.29176e-66	pyridine nucleotide-disulphide oxidoreductase dimerisation region	0
CUST_78482_PI422552764	contig00364	1.38915e-06	4.26707	up	3.81025	down	2.16775	up	4.45103	down	mera_staes ame: full=mercuric reductase ame: full=hg reductase	6.29176e-66	pyridine nucleotide-disulphide oxidoreductase dimerisation region	0
CUST_78483_PI422552764	contig00364	2.91305e-09	2.04084	up	6.1717	down	2.40715	up	3.40573	down	mera_staes ame: full=mercuric reductase ame: full=hg reductase	6.29176e-66	pyridine nucleotide-disulphide oxidoreductase dimerisation region	0
CUST_77875_PI422552764	contig00365	3.56244e-07	2.0409	down	1.09276	up	1.87217	down	1.35863	up	---NA---		---NA---
CUST_77877_PI422552764	contig00365	1.52026e-06	2.00462	down	1.00065	down	2.00071	down	1.37133	up	---NA---		---NA---
CUST_74725_PI422552764	contig00366	1.8295e-05	2.85464	down	7.16311	down	1.27965	down	3.06147	down	mera_staes ame: full=mercuric reductase ame: full=hg reductase	4.7911e-33	pyridine nucleotide-disulphide oxidoreductase dimerisation region	6.1583e-146
CUST_74726_PI422552764	contig00366	1.01926e-05	4.00027	down	9.66505	down	1.49948	down	3.87596	down	mera_staes ame: full=mercuric reductase ame: full=hg reductase	4.7911e-33	pyridine nucleotide-disulphide oxidoreductase dimerisation region	6.1583e-146
CUST_74727_PI422552764	contig00366	0.000111672	3.67314	down	5.11366	down	1.28446	down	3.0945	down	mera_staes ame: full=mercuric reductase ame: full=hg reductase	4.7911e-33	pyridine nucleotide-disulphide oxidoreductase dimerisation region	6.1583e-146
CUST_62368_PI422552764	contig00367	4.63393e-05	3.43573	down	16.5734	down	1.47508	down	2.44539	down	---NA---		---NA---
CUST_62369_PI422552764	contig00367	0.00154122	3.58578	down	6.26728	down	1.42257	down	2.28616	down	---NA---		---NA---
CUST_62370_PI422552764	contig00367	1.16699e-05	3.46732	down	26.2397	down	1.38984	down	2.93469	down	---NA---		---NA---
CUST_73555_PI422552764	contig00368	0.00352373	2.70694	up	1.09942	up	1.25933	up	1.39944	up	copia_drome ame: full=copia protein ame: full=gag-int-pol protein contains: ame: full=copia vlp protein contains: ame: full=copia protease	2.75204e-72	ac055769_6copia-type 28768-32772	1.92641e-74
CUST_65414_PI422552764	contig00369	0.000423975	2.58337	down	1.83315	down	1.69268	down	1.51577	down	---NA---		---NA---
CUST_51773_PI422552764	contig00373	0.00175406	2.50068	up	1.31307	up	1.37816	up	1.20072	up	---NA---		---NA---
CUST_58444_PI422552764	contig00375	5.37963e-05	4.38899	up	4.29529	up	3.46145	up	2.62724	up	---NA---		---NA---
CUST_49505_PI422552764	contig00377	0.00123141	1.84039	up	2.38831	up	1.86075	up	2.53659	up	---NA---		---NA---
CUST_65446_PI422552764	contig00380	0.00126515	3.98379	up	3.28113	up	3.6541	up	2.15952	up	---NA---		---NA---
CUST_65448_PI422552764	contig00380	0.00323864	3.53	up	1.15518	up	2.36326	up	1.51	up	---NA---		---NA---
CUST_71236_PI422552764	contig00381	0.00178193	1.48767	down	1.43398	down	2.14267	down	1.269	down	---NA---		---NA---
CUST_71238_PI422552764	contig00381	0.00240036	1.58474	down	1.54693	down	2.23393	down	1.19797	down	---NA---		---NA---
CUST_69810_PI422552764	contig00382	0.00307589	1.3091	down	1.795	up	1.50194	up	2.10884	up	---NA---		---NA---
CUST_27098_PI422552764	contig00384	0.00159204	2.0322	down	1.61234	up	2.02607	down	1.43233	up	---NA---		---NA---
CUST_27100_PI422552764	contig00384	0.000214014	2.21326	down	1.43095	up	1.56231	down	1.51216	up	---NA---		---NA---
CUST_254_PI422552764	contig00385	0.000338469	2.64177	up	1.05329	down	1.38845	up	1.05396	down	---NA---		---NA---
CUST_255_PI422552764	contig00385	0.000893583	3.16929	up	1.12192	up	1.2643	up	1.26943	up	---NA---		---NA---
CUST_1834_PI422552764	contig00389	0.000817661	4.03063	up	1.78354	up	2.97978	up	1.26531	up	---NA---		---NA---
CUST_64408_PI422552764	contig00392	0.000456216	2.05426	down	1.44141	down	1.87309	down	1.13805	down	---NA---		---NA---
CUST_64410_PI422552764	contig00392	0.00101322	2.04534	down	1.51926	down	1.77629	down	1.10519	down	---NA---		---NA---
CUST_66067_PI422552764	contig00393	8.50072e-07	1.99455	up	3.27851	down	1.81811	up	2.43428	down	---NA---		---NA---
CUST_66068_PI422552764	contig00393	4.50002e-05	1.77294	up	1.59074	down	2.29668	up	1.64401	down	---NA---		---NA---
CUST_43846_PI422552764	contig00394	0.00275425	1.96697	up	2.40191	down	1.09113	down	1.90787	down	---NA---		---NA---
CUST_43847_PI422552764	contig00394	0.000879454	2.5681	up	1.7482	down	1.11694	down	1.41718	down	---NA---		---NA---
CUST_43848_PI422552764	contig00394	0.0020539	1.20525	up	2.158	down	1.55571	down	2.47978	down	---NA---		---NA---
CUST_75562_PI422552764	contig00397	1.77423e-07	2.79568	up	2.51513	down	1.93409	up	2.4767	down	---NA---		---NA---
CUST_75563_PI422552764	contig00397	7.17213e-07	3.53366	up	2.40887	down	2.8001	up	1.95796	down	---NA---		---NA---
CUST_75564_PI422552764	contig00397	8.6424e-07	3.88385	up	1.38856	down	2.05372	up	2.00448	down	---NA---		---NA---
CUST_77825_PI422552764	contig00399	1.50703e-06	1.63341	up	2.90781	down	1.18032	up	1.8645	down	---NA---		contains domains for prephenate dehydrogenase and nucleoside-diphosphate-sugar epimerases	1.09691e-84
CUST_77826_PI422552764	contig00399	7.16812e-06	1.51524	up	2.61135	down	1.06376	up	1.88326	down	---NA---		contains domains for prephenate dehydrogenase and nucleoside-diphosphate-sugar epimerases	1.09691e-84
CUST_58304_PI422552764	contig00410	0.000674437	3.00287	down	1.2941	down	1.16576	up	1.47948	up	---NA---		---NA---
CUST_76899_PI422552764	contig00413	9.07557e-07	2.31683	up	1.44448	down	1.59466	up	1.23897	down	---NA---		---NA---
CUST_59103_PI422552764	contig00418	0.00245721	1.17077	down	1.63595	down	2.0093	up	1.80433	down	---NA---		---NA---
CUST_14345_PI422552764	contig00419	0.000174011	2.4457	down	1.17443	down	1.42771	up	1.29115	down	---NA---		---NA---
CUST_14346_PI422552764	contig00419	0.000626244	2.38171	down	1.24873	down	1.28553	up	1.38088	down	---NA---		---NA---
CUST_14347_PI422552764	contig00419	0.000811104	2.26146	down	1.18841	down	1.34925	up	1.251	down	---NA---		---NA---
CUST_63355_PI422552764	contig00420	3.00736e-06	3.25419	down	1.32231	down	1.15626	up	1.46792	down	cysk2_braju ame: full=cysteine synthase short=csase ame: full=o-acetylserine sulfhydrylase ame: full=o-acetylserine -lyase short=oas-tl ame: full=oas-tl6	3.53474e-41	protein	1.76338e-59
CUST_63356_PI422552764	contig00420	1.04087e-05	3.36375	down	1.55607	down	1.20196	up	1.53173	down	cysk2_braju ame: full=cysteine synthase short=csase ame: full=o-acetylserine sulfhydrylase ame: full=o-acetylserine -lyase short=oas-tl ame: full=oas-tl6	3.53474e-41	protein	1.76338e-59
CUST_63357_PI422552764	contig00420	1.2879e-05	3.42969	down	1.62729	down	1.13291	up	1.57306	down	cysk2_braju ame: full=cysteine synthase short=csase ame: full=o-acetylserine sulfhydrylase ame: full=o-acetylserine -lyase short=oas-tl ame: full=oas-tl6	3.53474e-41	protein	1.76338e-59
CUST_27701_PI422552764	contig00424	5.98671e-06	2.11034	up	1.88291	down	1.43385	up	1.96687	down	---NA---		---NA---
CUST_27702_PI422552764	contig00424	3.30831e-06	3.9931	up	1.67736	down	1.93766	up	2.07656	down	---NA---		---NA---
CUST_27703_PI422552764	contig00424	3.74248e-05	3.82472	up	1.30909	down	2.15514	up	1.94469	down	---NA---		---NA---
CUST_7976_PI422552764	contig00425	1.11532e-05	1.40305	up	2.89699	down	1.25308	down	2.08205	down	---NA---		---NA---
CUST_7977_PI422552764	contig00425	0.0016753	1.6539	up	2.97451	down	1.42269	down	1.81386	down	---NA---		---NA---
CUST_68858_PI422552764	contig00430	0.00256576	1.21174	up	2.32978	down	2.00166	up	1.04153	up	---NA---		---NA---
CUST_68859_PI422552764	contig00430	0.000807688	1.05355	down	3.01088	down	1.22932	up	1.62461	down	---NA---		---NA---
CUST_49777_PI422552764	contig00431	1.2512e-05	2.39608	up	3.03628	down	1.57819	up	1.52201	down	---NA---		---NA---
CUST_49778_PI422552764	contig00431	0.000121712	2.98069	up	2.54815	down	2.85725	up	1.21625	down	---NA---		---NA---
CUST_49779_PI422552764	contig00431	1.72215e-05	4.61404	up	1.52872	down	3.56765	up	1.46328	up	---NA---		---NA---
CUST_610_PI422552764	contig00432	5.21415e-06	4.42409	up	1.12235	down	1.48245	up	1.38027	up	---NA---		---NA---
CUST_611_PI422552764	contig00432	8.84853e-05	3.51011	up	1.28748	down	1.03918	up	1.10553	up	---NA---		---NA---
CUST_612_PI422552764	contig00432	1.36501e-06	4.86169	up	1.00046	up	1.5871	up	1.70595	up	---NA---		---NA---
CUST_34442_PI422552764	contig00433	0.000106335	2.04569	up	1.76039	down	1.4751	up	1.11291	down	---NA---		---NA---
CUST_14174_PI422552764	contig00434	2.10972e-06	3.88499	up	2.80047	down	1.6194	up	1.01037	down	---NA---		---NA---
CUST_14175_PI422552764	contig00434	0.000552859	2.87243	up	1.99248	down	2.51157	up	1.15728	up	---NA---		---NA---
CUST_1633_PI422552764	contig00435	9.32531e-06	1.82605	up	1.72249	down	2.22139	up	1.06899	up	---NA---		---NA---
CUST_1634_PI422552764	contig00435	8.19298e-06	1.9418	up	1.76251	down	2.34207	up	1.1505	up	---NA---		---NA---
CUST_1635_PI422552764	contig00435	1.52831e-05	1.89168	up	1.73339	down	2.28044	up	1.08729	up	---NA---		---NA---
CUST_9669_PI422552764	contig00436	0.00330564	1.65238	up	1.67777	up	2.14044	up	1.34408	up	---NA---		---NA---
CUST_9670_PI422552764	contig00436	0.00236781	2.2006	up	2.24685	down	1.99069	up	1.04764	up	---NA---		---NA---
CUST_8390_PI422552764	contig00437	0.000364167	1.33518	up	2.37495	down	1.08749	down	1.09226	down	---NA---		---NA---
CUST_8391_PI422552764	contig00437	0.000361071	1.36783	up	2.29832	down	1.10575	down	1.08339	down	---NA---		---NA---
CUST_8392_PI422552764	contig00437	0.000157993	1.32887	up	2.38037	down	1.10595	down	1.12267	down	---NA---		---NA---
CUST_41434_PI422552764	contig00443	6.36937e-07	3.86009	up	1.34789	down	3.46789	up	1.24294	down	---NA---		---NA---
CUST_11741_PI422552764	contig00445	2.20231e-06	1.91186	up	2.58757	down	1.56133	up	1.23459	down	---NA---		---NA---
CUST_11742_PI422552764	contig00445	2.96602e-06	2.01561	up	2.4916	down	1.56946	up	1.15272	down	---NA---		---NA---
CUST_11743_PI422552764	contig00445	2.30351e-05	1.90247	up	2.46713	down	1.52409	up	1.20418	down	---NA---		---NA---
CUST_19687_PI422552764	contig00446	0.00243233	1.92176	down	3.36209	down	1.21188	up	1.54143	down	---NA---		---NA---
CUST_14177_PI422552764	contig00449	7.959e-07	3.05138	up	2.01249	down	2.11796	up	1.67876	down	---NA---		---NA---
CUST_14178_PI422552764	contig00449	0.000217169	4.98573	up	1.77006	down	2.12105	up	2.08327	down	---NA---		---NA---
CUST_14179_PI422552764	contig00449	0.000148761	2.20496	up	2.14127	down	1.45697	up	2.022	down	---NA---		---NA---
CUST_4635_PI422552764	contig00450	0.000837065	2.13776	up	4.12014	down	1.22832	down	2.34741	down	---NA---		gag,protease,endonuclease, reverse transcriptase,RNaseH [Volvox carteri f. nagariensis]	1.75952e-09
CUST_4636_PI422552764	contig00450	0.00088025	2.51271	up	3.16814	down	1.12516	down	2.37584	down	---NA---		gag,protease,endonuclease, reverse transcriptase,RNaseH [Volvox carteri f. nagariensis]	1.75952e-09
CUST_4637_PI422552764	contig00450	0.00016027	2.36359	up	4.24993	down	1.01082	down	2.50165	down	---NA---		gag,protease,endonuclease, reverse transcriptase,RNaseH [Volvox carteri f. nagariensis]	1.75952e-09
CUST_55529_PI422552764	contig00452	0.00055149	2.22459	up	2.20668	down	1.48695	up	1.04532	down	---NA---		---NA---
CUST_55530_PI422552764	contig00452	0.000954767	1.49862	up	2.22844	down	1.01675	down	1.11414	up	---NA---		---NA---
CUST_14504_PI422552764	contig00454	6.30414e-05	3.71303	down	2.00771	down	2.29657	down	1.39126	down	---NA---		---NA---
CUST_14505_PI422552764	contig00454	2.26451e-05	5.06307	down	2.07291	down	2.36148	down	1.5092	down	---NA---		---NA---
CUST_14506_PI422552764	contig00454	1.12171e-05	4.37563	down	2.06964	down	2.20912	down	1.30305	down	---NA---		---NA---
CUST_14180_PI422552764	contig00455	0.00045686	4.66528	down	4.38827	down	2.33557	down	2.46282	down	---NA---		---NA---
CUST_14181_PI422552764	contig00455	0.00104505	3.02519	down	3.62872	down	1.72168	down	2.27815	down	---NA---		---NA---
CUST_14182_PI422552764	contig00455	3.22227e-05	1.00756	up	2.80312	down	1.53768	down	1.86336	down	---NA---		---NA---
CUST_44848_PI422552764	contig00456	1.07898e-05	3.45313	up	6.61884	down	1.71817	up	2.01173	down	---NA---		---NA---
CUST_44849_PI422552764	contig00456	8.50582e-06	1.99855	up	7.02942	down	1.34824	up	2.14238	down	---NA---		---NA---
CUST_44850_PI422552764	contig00456	0.000157538	2.05413	up	3.31926	down	1.45633	up	1.25583	down	---NA---		---NA---
CUST_10848_PI422552764	contig00457	1.58309e-06	1.45381	up	2.05942	down	1.60655	up	1.21985	down	---NA---		---NA---
CUST_50524_PI422552764	contig00458	3.25039e-06	2.19423	down	1.96959	up	1.00334	up	1.53957	up	---NA---		ac010924_18 ests gb	6.88825e-64
CUST_50525_PI422552764	contig00458	6.64836e-06	2.29032	down	1.87817	up	1.06053	down	1.49693	up	---NA---		ac010924_18 ests gb	6.88825e-64
CUST_50526_PI422552764	contig00458	1.00049e-05	2.21399	down	2.00606	up	1.02413	up	1.6316	up	---NA---		ac010924_18 ests gb	6.88825e-64
CUST_1975_PI422552764	contig00470	0.00198479	2.11129	up	1.65527	up	1.19006	down	1.03931	up	---NA---		---NA---
CUST_3693_PI422552764	contig00472	0.000904311	2.81206	up	1.48613	up	3.50694	up	2.91668	up	---NA---		---NA---
CUST_3694_PI422552764	contig00472	0.00321728	2.99791	up	1.52494	up	3.81995	up	2.07121	up	---NA---		---NA---
CUST_6285_PI422552764	contig00480	0.00297818	3.00628	up	1.4559	down	1.37666	up	1.01975	down	dnaj_baccn ame: full=chaperone protein dnaj	3.98224e-08	domain protein	2.411e-19
CUST_6286_PI422552764	contig00480	0.00337047	4.34297	up	1.17237	up	1.39885	up	1.38275	up	dnaj_baccn ame: full=chaperone protein dnaj	3.98224e-08	domain protein	2.411e-19
CUST_58696_PI422552764	contig00496	0.000996399	2.29124	up	3.49359	up	1.50286	up	2.37856	up	---NA---		conserved unknown protein [Ectocarpus siliculosus]	4.57632e-52
CUST_58697_PI422552764	contig00496	0.00293128	3.23091	up	2.51565	up	1.19311	up	2.24616	up	---NA---		conserved unknown protein [Ectocarpus siliculosus]	4.57632e-52
CUST_76675_PI422552764	contig00497	0.00407531	3.57401	up	1.5366	up	2.0986	up	3.26379	up	---NA---		---NA---
CUST_75079_PI422552764	contig00499	0.000353254	2.61086	down	1.16629	up	1.01587	down	1.1483	up	rl16_blopb ame: full=50s ribosomal protein l16	1.49969e-21	ribosomal protein s3	2.0222e-147
CUST_75080_PI422552764	contig00499	0.000303726	2.83197	down	1.00647	up	1.05966	down	1.08067	up	rl16_blopb ame: full=50s ribosomal protein l16	1.49969e-21	ribosomal protein s3	2.0222e-147
CUST_75081_PI422552764	contig00499	0.000181239	2.60133	down	1.03519	up	1.05965	up	1.18815	up	rl16_blopb ame: full=50s ribosomal protein l16	1.49969e-21	ribosomal protein s3	2.0222e-147
CUST_78108_PI422552764	contig00500	0.000628359	3.39403	down	1.01301	up	1.4451	down	1.13907	up	rs12_aquae ame: full=30s ribosomal protein s12	5.08685e-36	ribosomal protein s12	1.5635e-97
CUST_70570_PI422552764	contig00502	1.99232e-11	23.9656	down	1.92869	down	1.46299	down	1.45754	down	---NA---		---NA---
CUST_70571_PI422552764	contig00502	1.10424e-11	28.6606	down	2.06423	down	1.37401	down	1.43049	down	---NA---		---NA---
CUST_70572_PI422552764	contig00502	1.31379e-11	24.7085	down	1.93553	down	1.46486	down	1.49168	down	---NA---		---NA---
CUST_68147_PI422552764	contig00503	0.000193203	1.38726	down	2.22274	up	1.0511	down	1.58967	up	---NA---		---NA---
CUST_15710_PI422552764	contig00504	0.00303915	2.54329	up	1.39549	down	1.36483	up	1.20025	up	---NA---		---NA---
CUST_15711_PI422552764	contig00504	0.00145735	2.28424	up	1.6215	down	1.00662	up	1.08053	down	---NA---		---NA---
CUST_15712_PI422552764	contig00504	0.000187131	2.18395	up	1.96462	down	1.23693	up	1.12475	down	---NA---		---NA---
CUST_60652_PI422552764	contig00507	0.00205099	3.35955	up	1.06107	down	2.84646	up	1.13557	down	---NA---		---NA---
CUST_49357_PI422552764	contig00508	0.000829949	3.02682	up	1.57268	down	2.63907	up	2.11146	down	---NA---		---NA---
CUST_49358_PI422552764	contig00508	0.000141488	2.49305	up	1.83655	down	2.22298	up	3.03757	down	---NA---		---NA---
CUST_49359_PI422552764	contig00508	0.000631503	2.68741	up	1.20495	down	3.79947	up	1.92588	down	---NA---		---NA---
CUST_2121_PI422552764	contig00509	0.00213131	1.70501	up	2.61417	down	1.40679	up	2.20755	down	---NA---		---NA---
CUST_2122_PI422552764	contig00509	0.00100509	1.54963	up	2.55527	down	1.17462	up	2.52127	down	---NA---		---NA---
CUST_36133_PI422552764	contig00510	0.000223762	1.38659	down	6.45932	down	1.11207	up	3.61446	down	---NA---		---NA---
CUST_36134_PI422552764	contig00510	0.00164003	1.04783	down	4.68226	down	1.07227	up	3.56261	down	---NA---		---NA---
CUST_36135_PI422552764	contig00510	0.00150916	1.23499	down	4.65799	down	1.11875	up	2.78103	down	---NA---		---NA---
CUST_60655_PI422552764	contig00511	0.000142792	3.05927	up	1.50339	down	1.87909	up	2.08975	down	tbh1_caebr ame: full=tyramine beta-hydroxylase flags: precursor	1.79806e-09	dbh-like monooxygenase protein 1 homolog	2.91959e-63
CUST_60657_PI422552764	contig00511	7.72056e-06	4.12814	up	1.1644	down	2.84291	up	2.52528	down	tbh1_caebr ame: full=tyramine beta-hydroxylase flags: precursor	1.79806e-09	dbh-like monooxygenase protein 1 homolog	2.91959e-63
CUST_77839_PI422552764	contig00513	1.19184e-05	1.93824	down	1.65346	up	1.45068	down	2.52242	up	dopo_rat ame: full=dopamine beta-hydroxylase ame: full=dopamine beta-monooxygenase contains: ame: full=soluble dopamine beta-hydroxylase	2.108e-28	dbh-like monooxygenase protein 1 homolog	1.2017e-136
CUST_77840_PI422552764	contig00513	6.85875e-05	2.28237	down	1.63407	up	1.62695	down	2.2224	up	dopo_rat ame: full=dopamine beta-hydroxylase ame: full=dopamine beta-monooxygenase contains: ame: full=soluble dopamine beta-hydroxylase	2.108e-28	dbh-like monooxygenase protein 1 homolog	1.2017e-136
CUST_77841_PI422552764	contig00513	1.05239e-05	2.30444	down	1.22373	up	1.27643	down	1.69083	up	dopo_rat ame: full=dopamine beta-hydroxylase ame: full=dopamine beta-monooxygenase contains: ame: full=soluble dopamine beta-hydroxylase	2.108e-28	dbh-like monooxygenase protein 1 homolog	1.2017e-136
CUST_78175_PI422552764	contig00515	1.27977e-08	3.37661	up	1.8942	up	3.2483	up	1.70581	up	tbh1_caebr ame: full=tyramine beta-hydroxylase flags: precursor	5.11291e-07	conserved unknown protein [Ectocarpus siliculosus]	1.63312e-49
CUST_78176_PI422552764	contig00515	1.22689e-06	3.70743	up	1.4882	up	2.85011	up	1.55357	up	tbh1_caebr ame: full=tyramine beta-hydroxylase flags: precursor	5.11291e-07	conserved unknown protein [Ectocarpus siliculosus]	1.63312e-49
CUST_78177_PI422552764	contig00515	0.00027815	3.77271	up	1.8563	up	2.80293	up	1.41703	up	tbh1_caebr ame: full=tyramine beta-hydroxylase flags: precursor	5.11291e-07	conserved unknown protein [Ectocarpus siliculosus]	1.63312e-49
CUST_14508_PI422552764	contig00516	0.0019916	2.58047	down	1.29024	up	2.45718	down	2.04324	down	---NA---		---NA---
CUST_63557_PI422552764	contig00521	0.00389276	2.89168	up	3.20399	up	1.67528	up	2.07232	up	---NA---		---NA---
CUST_27278_PI422552764	contig00523	9.3225e-07	3.70735	down	1.28971	down	1.17593	down	1.14387	down	---NA---		---NA---
CUST_27279_PI422552764	contig00523	4.18265e-07	3.75699	down	1.15981	down	1.21297	down	1.16421	down	---NA---		---NA---
CUST_27280_PI422552764	contig00523	1.36292e-07	4.23205	down	1.26788	down	1.24632	down	1.17578	down	---NA---		---NA---
CUST_77659_PI422552764	contig00524	0.000233904	1.87086	up	1.908	down	1.06422	down	2.0568	down	---NA---		---NA---
CUST_77660_PI422552764	contig00524	2.88479e-05	2.92946	up	2.33147	down	1.00052	down	2.10534	down	---NA---		---NA---
CUST_77661_PI422552764	contig00524	2.40292e-05	2.79966	up	2.69694	down	1.04094	down	2.5422	down	---NA---		---NA---
CUST_72335_PI422552764	contig00525	0.00331755	1.28571	up	2.05894	down	1.27974	up	1.76592	down	---NA---		---NA---
CUST_51842_PI422552764	contig00526	0.00046948	1.89796	down	1.5465	down	3.02549	down	1.05366	down	---NA---		---NA---
CUST_51843_PI422552764	contig00526	0.00340076	1.74305	down	1.49776	down	2.9197	down	1.00598	down	---NA---		---NA---
CUST_73108_PI422552764	contig00529	3.64637e-09	5.71714	up	1.16192	up	2.83563	up	1.28137	down	---NA---		---NA---
CUST_73109_PI422552764	contig00529	7.6993e-08	2.73939	up	1.09465	down	1.96586	up	1.2989	down	---NA---		---NA---
CUST_73110_PI422552764	contig00529	4.06759e-08	3.23572	up	1.05721	up	1.79044	up	1.37077	down	---NA---		---NA---
CUST_38168_PI422552764	contig00531	0.00427065	1.45474	down	1.5401	down	2.38018	down	1.23767	down	---NA---		---NA---
CUST_71373_PI422552764	contig00536	0.00226829	3.18326	down	1.15285	down	2.18059	down	2.06658	down	---NA---		ammonium transporter	6.81254e-30
CUST_69109_PI422552764	contig00537	0.00254642	4.28089	up	3.22663	up	2.11662	up	1.87943	up	---NA---		---NA---
CUST_64514_PI422552764	contig00538	0.00327151	3.02653	up	2.9276	up	1.53038	up	1.89257	up	---NA---		---NA---
CUST_65802_PI422552764	contig00542	0.00204573	1.0187	down	2.25496	down	1.02914	up	1.23272	down	---NA---		---NA---
CUST_69003_PI422552764	contig00546	0.000338326	1.09251	down	2.42165	down	1.26608	down	1.61883	down	---NA---		---NA---
CUST_76081_PI422552764	contig00547	2.92534e-06	1.78092	down	2.04081	up	1.49084	up	1.97757	up	---NA---		---NA---
CUST_76082_PI422552764	contig00547	0.000190765	1.29418	down	2.09139	up	1.5513	up	2.10814	up	---NA---		---NA---
CUST_76083_PI422552764	contig00547	8.25263e-07	2.92643	down	2.66024	up	1.01637	down	2.64472	up	---NA---		---NA---
CUST_50059_PI422552764	contig00549	9.03268e-06	6.39133	up	1.06771	down	2.27084	up	1.43517	up	---NA---		---NA---
CUST_50060_PI422552764	contig00549	5.70674e-06	6.36925	up	1.09806	up	2.87219	up	1.5012	up	---NA---		---NA---
CUST_50061_PI422552764	contig00549	2.06287e-05	9.44374	up	1.47154	up	2.98728	up	2.04436	up	---NA---		---NA---
CUST_76384_PI422552764	contig00552	0.000181836	2.00538	down	1.4095	down	1.23324	up	1.79964	down	y2446_arath ame: full=uncharacterized protein chloroplastic flags: precursor	1.43569e-10	nad-dependent epimerase dehydratase	5.8185e-109
CUST_69058_PI422552764	contig00554	0.00190546	1.0483	up	2.98894	up	1.21374	up	1.44504	up	---NA---		---NA---
CUST_69060_PI422552764	contig00554	2.16684e-06	1.17217	down	3.87743	up	1.01142	up	1.56354	up	---NA---		---NA---
CUST_76529_PI422552764	contig00557	5.0478e-05	1.87948	down	4.29234	down	1.39809	up	2.8371	down	---NA---		---NA---
CUST_76530_PI422552764	contig00557	2.09483e-05	1.93616	down	3.89433	down	1.36282	up	2.82551	down	---NA---		---NA---
CUST_75945_PI422552764	contig00558	1.9162e-05	7.18374	up	2.41507	up	2.86559	up	1.57334	up	rm24_bovin ame: full=39s ribosomal protein mitochondrial short=l24mt short=mrp-l24 flags: precursor	1.05812e-15	39s ribosomal protein	3.20638e-77
CUST_66280_PI422552764	contig00559	4.6998e-08	2.09384	up	6.86904	down	1.7243	up	6.71253	down	---NA---		---NA---
CUST_66281_PI422552764	contig00559	5.6896e-05	1.66699	up	2.74885	down	1.90574	up	6.47873	down	---NA---		---NA---
CUST_66282_PI422552764	contig00559	1.62826e-06	1.16072	down	9.18976	down	1.09708	up	14.0178	down	---NA---		---NA---
CUST_3372_PI422552764	contig00561	1.31511e-05	2.00716	up	6.56353	down	2.11076	up	5.87902	down	---NA---		---NA---
CUST_3373_PI422552764	contig00561	2.69553e-05	2.28495	up	5.49181	down	2.58328	up	5.67515	down	---NA---		---NA---
CUST_3374_PI422552764	contig00561	4.49563e-05	2.13475	up	4.44029	down	2.31064	up	4.34616	down	---NA---		---NA---
CUST_29024_PI422552764	contig00564	0.000221561	8.64529	up	1.55624	up	3.02468	up	1.57008	up	---NA---		---NA---
CUST_29025_PI422552764	contig00564	3.01594e-06	11.093	up	1.48173	up	2.54414	up	2.2853	up	---NA---		---NA---
CUST_29026_PI422552764	contig00564	2.21582e-05	12.8497	up	1.69298	up	2.92447	up	2.53165	up	---NA---		---NA---
CUST_64486_PI422552764	contig00567	0.000151152	2.19767	down	1.55457	up	1.25167	down	2.13248	up	---NA---		---NA---
CUST_64487_PI422552764	contig00567	5.06763e-05	2.68114	down	1.87068	up	1.35395	down	2.17987	up	---NA---		---NA---
CUST_64488_PI422552764	contig00567	9.65214e-05	2.48447	down	1.60805	up	1.35596	down	2.09577	up	---NA---		---NA---
CUST_76531_PI422552764	contig00569	9.62417e-08	10.1971	up	1.46393	up	2.23483	up	1.0012	up	cysp2_maize ame: full=cysteine proteinase 2 flags: precursor	8.83332e-32	papain family cysteine protease containing protein	2.62544e-56
CUST_76532_PI422552764	contig00569	3.23573e-08	9.18927	up	1.01356	up	2.25325	up	1.12954	down	cysp2_maize ame: full=cysteine proteinase 2 flags: precursor	8.83332e-32	papain family cysteine protease containing protein	2.62544e-56
CUST_76533_PI422552764	contig00569	3.25954e-09	8.22753	up	1.02799	down	2.30012	up	1.22877	down	cysp2_maize ame: full=cysteine proteinase 2 flags: precursor	8.83332e-32	papain family cysteine protease containing protein	2.62544e-56
CUST_37990_PI422552764	contig00570	1.08732e-05	2.16635	down	1.88929	up	1.34216	down	2.05697	up	---NA---		---NA---
CUST_37991_PI422552764	contig00570	2.0358e-05	2.1794	down	1.81525	up	1.38098	down	1.98803	up	---NA---		---NA---
CUST_37992_PI422552764	contig00570	1.73304e-05	2.31481	down	1.82007	up	1.44014	down	1.92589	up	---NA---		---NA---
CUST_78343_PI422552764	contig00571	0.000152064	2.12398	up	3.7279	up	1.36603	up	3.82519	up	---NA---		crinkler family	6.54388e-15
CUST_78344_PI422552764	contig00571	6.02127e-07	2.76736	up	2.79374	up	1.80329	up	1.69238	up	---NA---		crinkler family	6.54388e-15
CUST_78345_PI422552764	contig00571	8.00779e-06	3.51786	up	2.20121	up	1.91467	up	1.69563	up	---NA---		crinkler family	6.54388e-15
CUST_43150_PI422552764	contig00572	8.65919e-07	1.49801	down	2.88515	up	1.41083	down	2.46045	up	---NA---		---NA---
CUST_43151_PI422552764	contig00572	1.04808e-05	2.08809	down	2.07764	up	1.30951	down	2.53754	up	---NA---		---NA---
CUST_43152_PI422552764	contig00572	3.91896e-07	2.20701	down	2.43286	up	1.41742	down	2.76622	up	---NA---		---NA---
CUST_74407_PI422552764	contig00577	0.00142928	1.54847	up	2.46677	down	1.00518	up	1.44442	down	---NA---		---NA---
CUST_74408_PI422552764	contig00577	0.000559674	1.63223	up	2.39008	down	1.09666	up	1.40248	down	---NA---		---NA---
CUST_1183_PI422552764	contig00579	0.000354626	4.02358	up	4.3426	up	1.88844	up	5.68711	up	---NA---		---NA---
CUST_58504_PI422552764	contig00580	2.23241e-06	1.27146	down	2.12996	up	1.67211	up	1.56114	up	---NA---		---NA---
CUST_58506_PI422552764	contig00580	0.00279661	1.16405	down	2.04615	up	1.5533	up	1.57083	up	---NA---		---NA---
CUST_77857_PI422552764	contig00581	1.97419e-06	2.22307	down	1.42872	up	1.29944	down	1.12069	up	y1770_syny3 ame: full=uncharacterized protein sll1770	5.358e-48	abc transporter-like	4.2581e-166
CUST_16982_PI422552764	contig00583	0.000191908	2.53093	down	1.50799	up	1.42859	down	1.81397	up	---NA---		---NA---
CUST_16983_PI422552764	contig00583	0.000115868	2.56327	down	1.44595	up	1.38776	down	1.6856	up	---NA---		---NA---
CUST_16984_PI422552764	contig00583	0.000181176	2.80468	down	1.45787	up	1.54823	down	1.64028	up	---NA---		---NA---
CUST_55118_PI422552764	contig00584	0.000172177	3.91388	up	1.86449	up	1.04789	down	1.55765	up	---NA---		---NA---
CUST_17466_PI422552764	contig00585	0.000291838	1.167	down	1.78165	up	1.29148	down	3.68563	up	---NA---		---NA---
CUST_17467_PI422552764	contig00585	0.00031475	1.05395	down	2.39695	up	1.05428	down	3.56978	up	---NA---		---NA---
CUST_66868_PI422552764	contig00586	2.95749e-05	2.50811	down	1.4928	up	1.33325	down	2.03848	up	---NA---		---NA---
CUST_66869_PI422552764	contig00586	4.24423e-05	2.48973	down	1.56908	up	1.3223	down	2.03397	up	---NA---		---NA---
CUST_66870_PI422552764	contig00586	0.000227317	2.46179	down	1.53143	up	1.35457	down	2.12045	up	---NA---		---NA---
CUST_70162_PI422552764	contig00588	2.10445e-05	2.01871	up	1.66069	down	1.3597	down	1.8964	down	dph1_nemve ame: full=diphthamide biosynthesis protein 1	4.53783e-104	diphthamide biosynthesis protein 1	1.6997e-120
CUST_70163_PI422552764	contig00588	1.14168e-05	2.68093	up	1.22372	down	1.12915	down	1.87363	down	dph1_nemve ame: full=diphthamide biosynthesis protein 1	4.53783e-104	diphthamide biosynthesis protein 1	1.6997e-120
CUST_70164_PI422552764	contig00588	0.000370639	1.43776	up	1.74838	down	1.54322	down	2.26937	down	dph1_nemve ame: full=diphthamide biosynthesis protein 1	4.53783e-104	diphthamide biosynthesis protein 1	1.6997e-120
CUST_55531_PI422552764	contig00593	8.36714e-05	2.06704	down	1.55013	up	1.2377	down	2.20183	up	---NA---		---NA---
CUST_55532_PI422552764	contig00593	4.97046e-05	2.2869	down	1.37033	up	1.08511	down	2.39548	up	---NA---		---NA---
CUST_55533_PI422552764	contig00593	0.00020809	2.10681	down	1.44288	up	1.29106	down	2.12092	up	---NA---		---NA---
CUST_39223_PI422552764	contig00596	3.37131e-05	3.17542	up	1.8928	up	1.46716	up	1.19211	up	---NA---		---NA---
CUST_39224_PI422552764	contig00596	3.29199e-05	2.79684	up	2.05131	up	1.25033	up	1.08894	up	---NA---		---NA---
CUST_39225_PI422552764	contig00596	0.000172177	2.89177	up	2.50555	up	1.58924	up	1.25868	up	---NA---		---NA---
CUST_46690_PI422552764	contig00599	7.22437e-08	4.05239	up	1.46105	down	1.80186	up	1.69431	down	---NA---		expressed unknown protein [Ectocarpus siliculosus]	1.43383e-16
CUST_46691_PI422552764	contig00599	1.12048e-07	4.87906	up	1.27488	down	1.77481	up	1.65233	down	---NA---		expressed unknown protein [Ectocarpus siliculosus]	1.43383e-16
CUST_46692_PI422552764	contig00599	9.59479e-07	4.0464	up	1.23074	down	1.87092	up	1.5509	down	---NA---		expressed unknown protein [Ectocarpus siliculosus]	1.43383e-16
CUST_51595_PI422552764	contig00600	7.6086e-09	6.12889	up	1.39137	up	4.37403	up	1.05868	up	---NA---		---NA---
CUST_51597_PI422552764	contig00600	0.000703548	2.9499	up	2.2393	up	2.75414	up	2.21252	up	---NA---		---NA---
CUST_15714_PI422552764	contig00602	6.78595e-05	1.42043	down	1.94811	up	1.25869	up	3.23933	up	---NA---		---NA---
CUST_15715_PI422552764	contig00602	5.4519e-06	1.1161	down	1.13051	down	2.34599	up	4.53964	up	---NA---		---NA---
CUST_62836_PI422552764	contig00605	3.04463e-05	168.18	down	11.2674	down	10.0993	down	7.16617	down	---NA---		---NA---
CUST_62837_PI422552764	contig00605	0.000176617	146.543	down	13.1366	down	10.5848	down	7.75841	down	---NA---		---NA---
CUST_62838_PI422552764	contig00605	4.29176e-06	36.9939	down	5.06045	down	4.89992	down	3.82937	down	---NA---		---NA---
CUST_56857_PI422552764	contig00606	3.67877e-05	5.14877	up	6.97706	up	2.29087	up	5.51537	up	y1669_arath ame: full=uncharacterized oxidoreductase chloroplastic flags: precursor	1.07956e-28	aldo keto reductase family protein	7.64757e-51
CUST_56858_PI422552764	contig00606	8.99804e-05	5.1744	up	5.72395	up	2.25283	up	4.85896	up	y1669_arath ame: full=uncharacterized oxidoreductase chloroplastic flags: precursor	1.07956e-28	aldo keto reductase family protein	7.64757e-51
CUST_56859_PI422552764	contig00606	1.97344e-05	3.99588	up	5.37693	up	1.83504	up	3.91584	up	y1669_arath ame: full=uncharacterized oxidoreductase chloroplastic flags: precursor	1.07956e-28	aldo keto reductase family protein	7.64757e-51
CUST_76150_PI422552764	contig00608	0.00218951	2.29032	up	1.46887	up	1.05236	down	1.12612	up	---NA---		---NA---
CUST_76151_PI422552764	contig00608	1.80871e-09	10.2557	up	2.45732	down	2.50002	up	1.9653	down	---NA---		---NA---
CUST_76152_PI422552764	contig00608	6.06424e-10	11.0512	up	2.18117	down	2.44035	up	2.15309	down	---NA---		---NA---
CUST_76045_PI422552764	contig00609	2.81194e-06	3.28313	down	1.71047	down	1.16436	up	1.6503	down	---NA---		superoxide dismutase	2.26153e-70
CUST_76046_PI422552764	contig00609	2.12503e-07	3.2858	down	1.34757	down	1.25273	up	1.4585	down	---NA---		superoxide dismutase	2.26153e-70
CUST_76047_PI422552764	contig00609	1.5354e-07	3.35039	down	1.37392	down	1.18796	up	1.48026	down	---NA---		superoxide dismutase	2.26153e-70
CUST_4776_PI422552764	contig00611	2.17506e-06	1.06549	up	2.27849	up	1.07965	down	2.03672	up	---NA---		---NA---
CUST_4777_PI422552764	contig00611	7.66062e-07	1.05002	up	2.20075	up	1.11272	down	2.05172	up	---NA---		---NA---
CUST_4778_PI422552764	contig00611	6.20982e-07	1.01881	up	2.30227	up	1.1297	down	2.10574	up	---NA---		---NA---
CUST_77137_PI422552764	contig00613	7.81592e-06	4.82534	down	1.62597	up	2.23258	down	1.09876	up	---NA---		---NA---
CUST_77138_PI422552764	contig00613	8.20644e-07	17.3722	down	1.79791	up	2.02808	down	1.41646	up	---NA---		---NA---
CUST_77139_PI422552764	contig00613	1.23848e-06	19.6009	down	1.63987	up	2.30635	down	1.2516	up	---NA---		---NA---
CUST_66526_PI422552764	contig00614	2.1733e-06	5.13228	down	1.4473	up	2.14679	down	1.14448	up	---NA---		hypothetical protein [Ectocarpus siliculosus]	3.40547e-20
CUST_66527_PI422552764	contig00614	3.17603e-05	5.13704	down	1.64939	up	1.36023	down	1.63721	up	---NA---		hypothetical protein [Ectocarpus siliculosus]	3.40547e-20
CUST_66528_PI422552764	contig00614	2.88472e-05	4.81673	down	1.63046	up	1.58825	down	1.47384	up	---NA---		hypothetical protein [Ectocarpus siliculosus]	3.40547e-20
CUST_74713_PI422552764	contig00617	0.0037337	2.14294	down	1.70745	down	1.62651	down	1.4513	up	karg_turco ame: full=arginine kinase short=ak	5.25984e-48	arginine kinase	6.1361e-154
CUST_36903_PI422552764	contig00618	0.00156815	1.81272	up	1.7713	up	1.08219	up	3.01948	up	---NA---		---NA---
CUST_1637_PI422552764	contig00620	0.00370716	2.01279	down	1.29574	down	1.74749	down	1.15195	down	---NA---		---NA---
CUST_61463_PI422552764	contig00623	0.00394834	1.43865	down	1.16376	up	1.30368	up	2.15617	up	---NA---		---NA---
CUST_70208_PI422552764	contig00631	3.5426e-05	2.36158	up	1.43704	down	1.33306	up	1.30344	down	---NA---		far-red impaired response protein	2.00294e-28
CUST_70209_PI422552764	contig00631	0.000135366	2.09607	up	1.5409	down	1.47298	up	1.18164	down	---NA---		far-red impaired response protein	2.00294e-28
CUST_55363_PI422552764	contig00635	0.000115502	2.73043	down	1.0728	down	1.68607	down	1.31969	up	---NA---		---NA---
CUST_55364_PI422552764	contig00635	0.000173679	2.53605	down	1.08084	down	1.60459	down	1.37484	up	---NA---		---NA---
CUST_55365_PI422552764	contig00635	5.25562e-05	2.70342	down	1.23301	down	1.66427	down	1.33783	up	---NA---		---NA---
CUST_36363_PI422552764	contig00636	0.00401417	2.28372	down	1.74321	down	1.55698	down	1.56274	up	---NA---		---NA---
CUST_72310_PI422552764	contig00639	7.12857e-09	1.42516	up	1.67667	up	1.07784	up	5.32487	up	---NA---		---NA---
CUST_72311_PI422552764	contig00639	0.00021444	1.02474	up	2.03982	up	1.3605	down	3.7062	up	---NA---		---NA---
CUST_72312_PI422552764	contig00639	1.16017e-05	1.38667	up	1.53525	up	1.30406	down	3.77973	up	---NA---		---NA---
CUST_72115_PI422552764	contig00640	1.38015e-08	3.29622	up	4.17905	down	2.07222	up	2.0093	down	---NA---		---NA---
CUST_72116_PI422552764	contig00640	1.512e-07	2.27478	up	2.85074	down	1.59964	up	1.70809	down	---NA---		---NA---
CUST_72117_PI422552764	contig00640	2.4711e-06	2.29958	up	2.69661	down	1.78128	up	1.41836	down	---NA---		---NA---
CUST_48673_PI422552764	contig00643	1.84337e-06	2.64373	down	1.92784	up	1.27188	down	1.68945	up	---NA---		---NA---
CUST_48674_PI422552764	contig00643	4.32457e-05	2.42302	down	1.73921	up	1.34699	down	1.58843	up	---NA---		---NA---
CUST_48675_PI422552764	contig00643	1.74608e-05	2.31705	down	1.9338	up	1.14597	down	1.67787	up	---NA---		---NA---
CUST_5794_PI422552764	contig00656	2.35197e-06	12.3669	up	1.74544	up	2.74178	up	1.09785	down	---NA---		---NA---
CUST_5795_PI422552764	contig00656	4.26291e-05	7.69399	up	1.03386	up	3.53603	up	1.09214	down	---NA---		---NA---
CUST_5796_PI422552764	contig00656	0.000260704	3.67327	up	1.36805	down	2.12379	up	2.24881	down	---NA---		---NA---
CUST_2370_PI422552764	contig00659	9.6434e-05	1.54313	down	3.09871	down	1.80353	down	1.48288	down	---NA---		---NA---
CUST_2372_PI422552764	contig00659	0.000503563	1.77493	down	3.13686	down	1.58591	down	1.83821	down	---NA---		---NA---
CUST_77869_PI422552764	contig00661	0.000133228	2.22274	up	1.56134	up	1.15371	down	1.02561	up	---NA---		---NA---
CUST_77870_PI422552764	contig00661	0.000117271	2.06685	up	1.23593	up	1.58625	down	1.59127	down	---NA---		---NA---
CUST_77871_PI422552764	contig00661	2.36034e-06	7.38948	up	1.80544	up	1.58699	up	1.03288	up	---NA---		---NA---
CUST_10244_PI422552764	contig00662	0.000271097	1.93358	up	2.00074	up	1.05154	down	1.0852	up	---NA---		---NA---
CUST_31352_PI422552764	contig00663	0.00170244	2.21925	down	1.46795	up	1.01296	up	1.90895	up	---NA---		---NA---
CUST_31353_PI422552764	contig00663	0.00108567	3.63169	down	1.12705	down	1.3476	down	1.41262	up	---NA---		---NA---
CUST_31354_PI422552764	contig00663	8.54093e-05	5.05353	down	1.04805	up	1.43735	down	1.39667	up	---NA---		---NA---
CUST_22938_PI422552764	contig00665	5.01857e-06	4.50717	up	1.41554	up	2.85556	up	2.04418	up	---NA---		---NA---
CUST_22939_PI422552764	contig00665	0.00343862	2.71311	up	1.38193	up	2.40164	up	1.47708	up	---NA---		---NA---
CUST_139_PI422552764	contig00668	0.000577108	2.58163	up	1.33007	up	1.64947	up	1.33872	down	---NA---		---NA---
CUST_140_PI422552764	contig00668	3.5488e-05	2.45323	up	1.1972	up	1.5878	up	1.49569	down	---NA---		---NA---
CUST_141_PI422552764	contig00668	0.000143698	2.14531	up	1.01445	up	1.60802	up	1.53737	down	---NA---		---NA---
CUST_73927_PI422552764	contig00677	7.07648e-09	2.4135	up	1.70919	down	1.1834	up	2.07073	down	---NA---		tpr domain protein	1.60455e-07
CUST_73928_PI422552764	contig00677	3.88527e-08	2.18509	up	1.74331	down	1.15699	up	1.98061	down	---NA---		tpr domain protein	1.60455e-07
CUST_73929_PI422552764	contig00677	1.86639e-08	2.14312	up	1.78985	down	1.14424	up	2.15711	down	---NA---		tpr domain protein	1.60455e-07
CUST_76444_PI422552764	contig00678	4.01883e-05	2.50158	down	1.10673	down	1.10835	down	1.10088	up	---NA---		hypothetical protein [Ectocarpus siliculosus]	1.03078e-12
CUST_76445_PI422552764	contig00678	0.000238143	2.13247	down	1.05539	down	1.14254	down	1.05801	up	---NA---		hypothetical protein [Ectocarpus siliculosus]	1.03078e-12
CUST_76446_PI422552764	contig00678	0.00170244	2.34301	down	1.39171	down	1.10903	down	1.00346	down	---NA---		hypothetical protein [Ectocarpus siliculosus]	1.03078e-12
CUST_54172_PI422552764	contig00682	6.80176e-08	2.19475	up	3.20522	down	1.662	up	1.58886	down	---NA---		---NA---
CUST_54173_PI422552764	contig00682	3.62141e-08	2.17687	up	3.20752	down	1.55277	up	1.78218	down	---NA---		---NA---
CUST_54174_PI422552764	contig00682	6.36159e-06	2.17951	up	3.01255	down	1.28101	up	1.98534	down	---NA---		---NA---
CUST_67769_PI422552764	contig00687	0.00235297	4.25077	up	1.90073	up	2.13937	up	1.50424	up	---NA---		---NA---
CUST_67770_PI422552764	contig00687	0.000471157	2.457	up	1.05343	down	1.41065	down	1.28166	down	---NA---		---NA---
CUST_3245_PI422552764	contig00691	0.00398677	2.23238	up	1.88156	up	1.04411	down	1.03748	up	---NA---		---NA---
CUST_18776_PI422552764	contig00692	2.28557e-07	4.10742	down	1.81876	up	1.16756	down	1.33617	up	---NA---		---NA---
CUST_18778_PI422552764	contig00692	0.000215538	1.91675	down	3.09757	up	1.31862	up	1.24977	up	---NA---		---NA---
CUST_45434_PI422552764	contig00693	0.0030288	1.17463	down	2.42235	down	2.28069	up	1.58174	up	---NA---		---NA---
CUST_45435_PI422552764	contig00693	0.00301637	1.49799	down	1.66421	down	2.04549	up	1.85433	up	---NA---		---NA---
CUST_18554_PI422552764	contig00696	8.33551e-05	9.7623	up	1.04685	up	1.98653	up	1.07295	up	---NA---		---NA---
CUST_18555_PI422552764	contig00696	0.000242629	4.55174	up	1.14438	up	1.54099	up	1.6343	down	---NA---		---NA---
CUST_18556_PI422552764	contig00696	0.000171196	9.53823	up	2.28764	up	1.65615	up	1.83658	up	---NA---		---NA---
CUST_77614_PI422552764	contig00699	2.83707e-06	1.4312	down	4.56052	down	1.45865	up	2.40049	down	---NA---		---NA---
CUST_77615_PI422552764	contig00699	5.39082e-06	1.26916	down	3.46578	down	1.50503	up	1.90236	down	---NA---		---NA---
CUST_77616_PI422552764	contig00699	1.17463e-06	3.54638	down	4.49371	down	1.15264	up	1.6072	down	---NA---		---NA---
CUST_74941_PI422552764	contig00700	0.00329524	2.44288	up	1.09411	up	1.34898	down	1.01771	down	---NA---		conserved unknown protein [Ectocarpus siliculosus]	3.71307e-13
CUST_74942_PI422552764	contig00700	6.80332e-05	8.31354	up	1.60783	up	1.91136	up	1.0305	up	---NA---		conserved unknown protein [Ectocarpus siliculosus]	3.71307e-13
CUST_74943_PI422552764	contig00700	2.56901e-06	15.3258	up	4.08213	up	3.68315	up	3.02511	up	---NA---		conserved unknown protein [Ectocarpus siliculosus]	3.71307e-13
CUST_68567_PI422552764	contig00702	0.000544897	2.7974	up	1.51634	down	1.51946	up	1.27308	down	naa20_dicdi ame: full=n-alpha-acetyltransferase catalytic subunit ame: full=n-terminal acetyltransferase b complex catalytic subunit naa20 homolog ame: full=n-acetyltransferase 5 homolog	4.48894e-55	n-acetyltransferase 5	5.55866e-83
CUST_68568_PI422552764	contig00702	0.000496964	4.06937	up	1.50092	down	2.52675	up	1.17497	down	naa20_dicdi ame: full=n-alpha-acetyltransferase catalytic subunit ame: full=n-terminal acetyltransferase b complex catalytic subunit naa20 homolog ame: full=n-acetyltransferase 5 homolog	4.48894e-55	n-acetyltransferase 5	5.55866e-83
CUST_44646_PI422552764	contig00703	2.1611e-06	1.02971	down	2.0392	down	1.38492	up	1.88461	down	---NA---		---NA---
CUST_48676_PI422552764	contig00704	0.00399342	3.0322	up	1.03715	down	1.82324	up	1.12598	down	---NA---		---NA---
CUST_48677_PI422552764	contig00704	0.00165795	4.64798	up	1.25362	up	2.6027	up	1.08099	up	---NA---		---NA---
CUST_77320_PI422552764	contig00707	0.000815665	2.9739	up	1.02236	up	2.15104	up	1.33498	up	sr1b_phypo ame: full=spherulin-1b flags: precursor	7.97723e-16	cupin-like protein	1.37397e-62
CUST_18971_PI422552764	contig00708	0.00159291	4.11148	up	1.31254	up	1.43489	up	1.27006	up	---NA---		---NA---
CUST_18972_PI422552764	contig00708	1.50652e-05	7.10396	up	1.63567	up	2.72409	up	1.68533	up	---NA---		---NA---
CUST_18973_PI422552764	contig00708	5.50397e-07	7.45387	up	1.57799	up	2.65132	up	1.53237	up	---NA---		---NA---
CUST_66946_PI422552764	contig00709	0.000173732	2.2539	down	1.28581	up	1.0347	up	1.02184	down	---NA---		---NA---
CUST_66947_PI422552764	contig00709	9.46955e-06	3.85152	down	1.03085	up	1.01349	up	1.12584	down	---NA---		---NA---
CUST_66948_PI422552764	contig00709	3.74542e-06	4.10242	down	1.0731	up	1.12719	down	1.18823	down	---NA---		---NA---
CUST_24371_PI422552764	contig00710	0.000194029	2.02549	up	1.20884	up	2.4328	up	1.14446	down	---NA---		---NA---
CUST_24372_PI422552764	contig00710	3.06846e-05	1.86608	up	1.28647	up	2.08607	up	1.23554	down	---NA---		---NA---
CUST_24373_PI422552764	contig00710	0.000142435	1.71942	up	1.13981	down	2.20294	up	1.15924	down	---NA---		---NA---
CUST_53260_PI422552764	contig00711	5.87295e-06	2.90427	down	1.31643	up	1.15019	down	1.10664	up	---NA---		---NA---
CUST_53261_PI422552764	contig00711	6.01855e-06	2.71762	down	1.37107	up	1.13174	down	1.11169	up	---NA---		---NA---
CUST_53262_PI422552764	contig00711	1.75342e-05	2.79332	down	1.32748	up	1.15219	down	1.07947	up	---NA---		---NA---
CUST_9550_PI422552764	contig00715	0.00388519	1.82327	up	3.38409	up	1.20634	up	1.18196	up	---NA---		---NA---
CUST_58408_PI422552764	contig00717	9.83738e-05	1.63635	up	2.12015	up	1.69669	up	1.73013	up	---NA---		methionine--trna ligase	7.49615e-15
CUST_58409_PI422552764	contig00717	0.000136439	2.15688	up	1.78166	up	1.90524	up	1.73783	up	---NA---		methionine--trna ligase	7.49615e-15
CUST_58410_PI422552764	contig00717	0.000706218	2.00862	up	1.76441	up	1.7238	up	1.59346	up	---NA---		methionine--trna ligase	7.49615e-15
CUST_60445_PI422552764	contig00720	2.95869e-07	3.15361	down	1.1221	down	1.68872	down	1.40976	up	---NA---		---NA---
CUST_60446_PI422552764	contig00720	3.55634e-07	3.59627	down	1.11106	down	1.73796	down	1.5426	up	---NA---		---NA---
CUST_60447_PI422552764	contig00720	5.36605e-09	23.3203	down	1.45891	down	2.32533	down	1.40287	up	---NA---		---NA---
CUST_8703_PI422552764	contig00723	0.00199911	2.18306	up	1.0048	down	2.44368	up	1.94429	up	---NA---		---NA---
CUST_64637_PI422552764	contig00732	6.80246e-05	2.24548	up	2.01671	down	1.83311	up	3.03582	down	---NA---		---NA---
CUST_64638_PI422552764	contig00732	0.00075681	4.20029	up	1.00521	down	3.97939	up	1.39605	up	---NA---		---NA---
CUST_69394_PI422552764	contig00743	0.000891384	2.97262	up	1.13106	up	3.16297	up	1.2769	up	---NA---		---NA---
CUST_69395_PI422552764	contig00743	1.81826e-06	1.76333	up	1.83457	down	1.65708	up	2.09672	down	---NA---		---NA---
CUST_69396_PI422552764	contig00743	5.50535e-05	1.88343	up	1.11361	down	2.16171	up	1.25291	down	---NA---		---NA---
CUST_12184_PI422552764	contig00746	0.000897403	1.40908	up	2.66204	up	1.87388	up	4.64433	up	---NA---		---NA---
CUST_20615_PI422552764	contig00747	1.19184e-05	1.00739	up	1.73078	up	1.41058	down	2.06762	up	---NA---		---NA---
CUST_8394_PI422552764	contig00749	0.00128547	1.59531	up	1.8325	up	2.30735	up	1.17107	up	---NA---		---NA---
CUST_75655_PI422552764	contig00750	0.000288643	1.19978	down	4.1165	down	1.0488	up	1.36234	down	---NA---		---NA---
CUST_75656_PI422552764	contig00750	0.000172177	1.44507	down	3.26656	down	1.02519	up	1.34307	down	---NA---		---NA---
CUST_75657_PI422552764	contig00750	1.96266e-05	2.36124	down	5.6975	down	1.03482	up	1.90616	down	---NA---		---NA---
CUST_13088_PI422552764	contig00752	9.23968e-05	6.53981	down	1.15708	down	1.76214	down	1.23409	down	---NA---		---NA---
CUST_13089_PI422552764	contig00752	0.00252813	3.49913	down	2.12207	down	2.41689	down	1.81293	down	---NA---		---NA---
CUST_13090_PI422552764	contig00752	0.000388451	2.90957	down	1.24374	down	2.21501	down	1.42193	down	---NA---		---NA---
CUST_50707_PI422552764	contig00753	2.80915e-08	12.1598	down	3.38344	up	1.92162	down	3.61063	up	---NA---		---NA---
CUST_50708_PI422552764	contig00753	1.18109e-09	11.0682	down	4.13412	up	1.66588	down	4.36177	up	---NA---		---NA---
CUST_50709_PI422552764	contig00753	1.32955e-09	9.3402	down	4.11156	up	1.66502	down	4.59989	up	---NA---		---NA---
CUST_7346_PI422552764	contig00755	0.000470174	3.1473	down	1.58288	up	1.32566	down	2.16624	up	---NA---		---NA---
CUST_7347_PI422552764	contig00755	0.000636973	3.28194	down	1.52769	up	1.32673	down	2.13166	up	---NA---		---NA---
CUST_7348_PI422552764	contig00755	0.000222917	3.2091	down	1.5949	up	1.40169	down	2.03899	up	---NA---		---NA---
CUST_3072_PI422552764	contig00756	0.00276561	4.28897	up	2.09648	up	1.21478	up	1.00014	up	---NA---		---NA---
CUST_3073_PI422552764	contig00756	0.00200109	2.71244	up	2.17134	up	1.27472	up	1.32518	down	---NA---		---NA---
CUST_56668_PI422552764	contig00758	0.000292576	19.9182	up	1.39787	up	1.19993	up	1.07931	up	---NA---		---NA---
CUST_56669_PI422552764	contig00758	7.67647e-05	23.2621	up	1.09001	up	1.27697	up	1.2026	up	---NA---		---NA---
CUST_56670_PI422552764	contig00758	1.01783e-05	5.80795	up	1.12925	up	1.56328	down	1.08733	down	---NA---		---NA---
CUST_44149_PI422552764	contig00767	0.00232685	1.79301	up	3.42393	up	1.55717	up	3.57687	up	---NA---		---NA---
CUST_44150_PI422552764	contig00767	0.000257728	1.93397	up	3.35987	up	1.06961	up	4.26973	up	---NA---		---NA---
CUST_44151_PI422552764	contig00767	0.00012555	1.85369	up	5.03081	up	1.36721	up	3.47903	up	---NA---		---NA---
CUST_24798_PI422552764	contig00771	7.53333e-05	3.51968	up	1.25898	up	3.66609	up	1.9887	up	---NA---		---NA---
CUST_55795_PI422552764	contig00776	0.00142209	3.57322	up	1.8598	up	2.86019	up	1.12973	up	---NA---		---NA---
CUST_55796_PI422552764	contig00776	9.44926e-05	3.22229	up	1.80625	up	1.58185	up	1.52378	down	---NA---		---NA---
CUST_71680_PI422552764	contig00778	1.07502e-07	9.59126	up	1.22309	down	1.6573	up	1.93066	down	---NA---		---NA---
CUST_71681_PI422552764	contig00778	1.42521e-07	4.83691	up	2.54853	down	1.00269	up	3.49928	down	---NA---		---NA---
CUST_71682_PI422552764	contig00778	1.15006e-06	13.1914	up	1.27522	down	1.65085	up	2.72238	down	---NA---		---NA---
CUST_58449_PI422552764	contig00779	3.20187e-06	2.26248	up	1.79548	down	1.09432	down	1.81333	down	---NA---		---NA---
CUST_33385_PI422552764	contig00783	2.78005e-05	2.26406	up	2.03201	down	1.45063	down	1.22268	down	---NA---		---NA---
CUST_33386_PI422552764	contig00783	2.09442e-05	2.25858	up	2.16406	down	1.49272	down	1.26478	down	---NA---		---NA---
CUST_33387_PI422552764	contig00783	7.16699e-05	2.22985	up	1.97394	down	1.45882	down	1.26981	down	---NA---		---NA---
CUST_9273_PI422552764	contig00784	0.000139276	2.07431	up	1.31611	down	1.18125	down	1.19496	up	---NA---		---NA---
CUST_42881_PI422552764	contig00785	0.00045686	2.86208	up	1.30335	up	1.34521	up	1.52771	down	---NA---		---NA---
CUST_42882_PI422552764	contig00785	0.00228753	1.91648	up	1.04304	up	1.0435	up	2.27018	down	---NA---		---NA---
CUST_16470_PI422552764	contig00786	0.00058108	1.71205	up	2.07452	up	1.03484	up	1.25396	up	---NA---		---NA---
CUST_8534_PI422552764	contig00796	0.000919111	5.92937	up	1.67797	up	1.63784	up	1.34848	up	---NA---		---NA---
CUST_8535_PI422552764	contig00796	0.000207838	4.95786	up	2.04557	up	2.10424	up	1.72595	up	---NA---		---NA---
CUST_8536_PI422552764	contig00796	0.00128612	3.30877	up	1.37836	up	1.30291	up	1.21336	up	---NA---		---NA---
CUST_75523_PI422552764	contig00798	0.000164538	2.17584	up	3.99513	down	1.55495	up	2.8225	down	---NA---		intersectin 2	1.02579e-08
CUST_68986_PI422552764	contig00801	6.80342e-07	5.53887	up	1.58352	down	4.27019	up	1.15934	down	---NA---		OSJNBb0034I13.10 [Oryza sativa (japonica cultivar-group)]	6.74e-07
CUST_68987_PI422552764	contig00801	3.23797e-07	5.06808	up	3.34053	down	3.96908	up	1.96554	down	---NA---		OSJNBb0034I13.10 [Oryza sativa (japonica cultivar-group)]	6.74e-07
CUST_68988_PI422552764	contig00801	1.78956e-08	5.9867	up	1.6287	down	4.56517	up	1.29096	down	---NA---		OSJNBb0034I13.10 [Oryza sativa (japonica cultivar-group)]	6.74e-07
CUST_74191_PI422552764	contig00802	1.97252e-05	2.49065	up	1.21366	up	1.2551	up	1.02136	down	---NA---		conserved unknown protein [Ectocarpus siliculosus]	1.32225e-57
CUST_74192_PI422552764	contig00802	0.000362014	6.87272	up	3.63505	down	2.74227	up	1.68706	down	---NA---		conserved unknown protein [Ectocarpus siliculosus]	1.32225e-57
CUST_74193_PI422552764	contig00802	1.18939e-05	12.2431	up	1.43041	down	8.45936	up	1.80415	down	---NA---		conserved unknown protein [Ectocarpus siliculosus]	1.32225e-57
CUST_60973_PI422552764	contig00804	0.000787006	3.49491	down	1.30827	down	1.47483	down	1.1587	down	---NA---		---NA---
CUST_60974_PI422552764	contig00804	0.000485418	3.5219	down	1.30957	down	1.49486	down	1.11766	down	---NA---		---NA---
CUST_60975_PI422552764	contig00804	0.00149428	3.25536	down	1.51835	down	1.57802	down	1.19163	down	---NA---		---NA---
CUST_58620_PI422552764	contig00805	0.00114551	1.13222	up	1.43059	down	1.07934	up	2.0749	down	---NA---		---NA---
CUST_2733_PI422552764	contig00807	3.47165e-06	3.47378	up	2.10943	down	2.77487	up	1.91298	down	---NA---		---NA---
CUST_58830_PI422552764	contig00808	0.00136693	1.2312	up	1.49719	down	2.02738	up	1.15744	down	gpma_geosl ame: full= -bisphosphoglycerate-dependent phosphoglycerate mutase short=phosphoglyceromutase short=pgam short=bpg-dependent pgam short=dpgm	6.74674e-32	phosphoglycerate mutase	1.80158e-32
CUST_48679_PI422552764	contig00811	0.00260144	8.90789	down	1.19635	up	2.21224	down	1.04062	down	psal_porpu ame: full=photosystem i reaction center subunit xi ame: full=psi-l ame: full=psi subunit v	8.8646e-40	photosystem i protein l	4.22173e-57
CUST_10850_PI422552764	contig00823	7.45599e-05	1.47403	up	2.40956	up	1.03445	up	3.8224	up	---NA---		---NA---
CUST_22418_PI422552764	contig00831	0.00129655	1.45258	up	3.48613	up	2.37438	up	3.13108	up	---NA---		---NA---
CUST_22419_PI422552764	contig00831	8.96539e-05	1.07103	up	3.59145	up	1.33801	up	3.50576	up	---NA---		---NA---
CUST_22420_PI422552764	contig00831	0.00103731	1.46864	down	1.58138	up	1.14151	down	2.17023	up	---NA---		---NA---
CUST_15350_PI422552764	contig00832	0.0034578	2.17391	down	1.28315	up	1.38671	down	1.36766	up	---NA---		---NA---
CUST_43154_PI422552764	contig00835	0.00335644	2.07758	up	1.01388	up	1.43912	up	1.24013	down	---NA---		conserved unknown protein [Ectocarpus siliculosus]	1.07753e-30
CUST_11612_PI422552764	contig00843	0.000404947	5.68863	up	1.27523	up	2.3528	up	2.08726	up	---NA---		---NA---
CUST_11613_PI422552764	contig00843	0.000751605	5.32186	up	1.12617	up	1.37655	up	1.501	up	---NA---		---NA---
CUST_11614_PI422552764	contig00843	0.000108714	6.4917	up	1.67009	up	2.81268	up	3.01546	up	---NA---		---NA---
CUST_50611_PI422552764	contig00844	0.000274428	2.62542	up	1.21926	down	3.55163	up	2.73413	up	---NA---		rieske (2fe-2s) region	3.35759e-10
CUST_50613_PI422552764	contig00844	0.000515057	3.22283	up	1.18715	down	3.33414	up	3.95273	up	---NA---		rieske (2fe-2s) region	3.35759e-10
CUST_16025_PI422552764	contig00845	0.000206028	1.69062	up	9.27729	down	1.05303	up	2.42775	down	---NA---		---NA---
CUST_16026_PI422552764	contig00845	1.70435e-05	1.04098	down	11.8297	down	1.65135	down	4.78096	down	---NA---		---NA---
CUST_16027_PI422552764	contig00845	4.71827e-07	1.07416	down	12.8552	down	1.31221	down	4.52217	down	---NA---		---NA---
CUST_27704_PI422552764	contig00847	5.27986e-07	2.07916	down	2.14997	up	1.09994	down	2.13384	up	---NA---		---NA---
CUST_27705_PI422552764	contig00847	3.22488e-08	2.54902	down	2.13341	up	1.43564	down	2.0128	up	---NA---		---NA---
CUST_27706_PI422552764	contig00847	4.46874e-08	2.48615	down	2.02852	up	1.37138	down	2.03	up	---NA---		---NA---
CUST_68593_PI422552764	contig00848	6.52116e-11	3.23081	down	2.11796	up	1.52199	down	1.74675	up	---NA---		---NA---
CUST_68594_PI422552764	contig00848	5.08959e-10	5.15596	down	2.397	up	1.62625	down	1.6691	up	---NA---		---NA---
CUST_68595_PI422552764	contig00848	4.49267e-09	3.55872	down	1.64237	up	1.22941	down	1.19539	up	---NA---		---NA---
CUST_38719_PI422552764	contig00851	7.78645e-11	5.4931	down	3.64107	up	1.0216	up	3.84826	up	---NA---		---NA---
CUST_38720_PI422552764	contig00851	2.82597e-11	5.35522	down	4.04785	up	1.11607	up	4.21523	up	---NA---		---NA---
CUST_38721_PI422552764	contig00851	1.57293e-10	5.2345	down	4.03754	up	1.09018	up	3.87998	up	---NA---		---NA---
CUST_77727_PI422552764	contig00854	0.00178834	2.04445	down	1.86744	down	1.54081	up	1.01939	up	---NA---		---NA---
CUST_75244_PI422552764	contig00863	6.41386e-09	1.58604	down	2.5293	up	1.29559	down	3.60242	up	---NA---		---NA---
CUST_75245_PI422552764	contig00863	1.01292e-07	1.487	down	2.07052	up	1.2988	down	3.16077	up	---NA---		---NA---
CUST_75246_PI422552764	contig00863	8.01957e-06	1.74169	down	2.11932	up	1.55912	down	3.19962	up	---NA---		---NA---
CUST_54277_PI422552764	contig00865	1.62906e-06	2.71786	down	2.12564	up	1.83356	down	2.63351	up	---NA---		---NA---
CUST_54278_PI422552764	contig00865	1.55456e-05	3.17612	down	2.01022	up	2.19492	down	2.70702	up	---NA---		---NA---
CUST_54279_PI422552764	contig00865	0.00228126	1.80869	down	2.21655	up	2.28644	down	2.40303	up	---NA---		---NA---
CUST_74861_PI422552764	contig00867	4.01812e-05	2.4552	up	1.48453	up	1.45716	up	1.20427	up	mfap1_mouse ame: full=microfibrillar-associated protein 1	1.61447e-36	microfibril-associated protein	9.51931e-78
CUST_74862_PI422552764	contig00867	0.000123583	2.64592	up	1.44799	up	1.67713	up	1.37528	up	mfap1_mouse ame: full=microfibrillar-associated protein 1	1.61447e-36	microfibril-associated protein	9.51931e-78
CUST_63358_PI422552764	contig00868	0.000373764	6.61256	up	1.54693	up	1.89431	up	1.14461	up	---NA---		---NA---
CUST_63359_PI422552764	contig00868	0.000148543	11.2398	up	1.07553	up	2.35801	up	1.77918	up	---NA---		---NA---
CUST_63360_PI422552764	contig00868	2.75393e-06	5.00249	up	1.13134	down	1.10646	up	1.1852	down	---NA---		---NA---
CUST_59689_PI422552764	contig00871	3.80004e-09	3.76518	up	1.15936	down	1.49138	up	1.38318	down	---NA---		---NA---
CUST_59690_PI422552764	contig00871	9.14647e-07	3.17508	up	1.4901	down	1.7185	up	1.30829	down	---NA---		---NA---
CUST_59691_PI422552764	contig00871	4.73169e-07	7.27029	up	1.10561	down	3.35837	up	1.19149	up	---NA---		---NA---
CUST_57596_PI422552764	contig00880	0.00278343	1.2322	up	3.0938	down	1.45015	down	1.7052	down	---NA---		---NA---
CUST_18362_PI422552764	contig00886	0.00310087	1.02465	up	1.07248	up	2.4738	down	1.02138	down	---NA---		lrr-gtpase of the roco family	1.46897e-08
CUST_36721_PI422552764	contig00892	2.85487e-10	3.28811	up	1.76341	down	1.46463	up	2.01505	down	---NA---		---NA---
CUST_36722_PI422552764	contig00892	1.17098e-09	3.15602	up	1.70613	down	1.52283	up	2.11398	down	---NA---		---NA---
CUST_36723_PI422552764	contig00892	3.54139e-11	3.85431	up	1.98952	down	1.5675	up	2.49618	down	---NA---		---NA---
CUST_49960_PI422552764	contig00896	3.75452e-05	1.90427	up	3.47397	up	1.65051	up	2.85736	up	---NA---		---NA---
CUST_49961_PI422552764	contig00896	1.36474e-05	2.09106	up	3.86962	up	1.7105	up	2.81683	up	---NA---		---NA---
CUST_49962_PI422552764	contig00896	1.85722e-05	2.10028	up	3.46675	up	1.47591	up	2.5131	up	---NA---		---NA---
CUST_67343_PI422552764	contig00904	0.0027379	1.48313	up	2.27577	down	1.01491	down	1.10471	down	---NA---		---NA---
CUST_62594_PI422552764	contig00911	0.00340278	1.47649	up	1.34587	down	2.19693	up	1.77288	down	---NA---		---NA---
CUST_616_PI422552764	contig00915	0.00116699	2.29138	up	2.53875	down	1.85245	up	1.17176	down	---NA---		---NA---
CUST_617_PI422552764	contig00915	0.00104175	1.7993	up	3.76717	down	1.49291	up	1.43344	down	---NA---		---NA---
CUST_65023_PI422552764	contig00919	4.46024e-05	3.32513	up	1.64997	down	2.62904	up	1.8088	down	---NA---		conserved unknown protein [Ectocarpus siliculosus]	1.28123e-66
CUST_65024_PI422552764	contig00919	2.03044e-05	2.61716	up	1.72638	down	2.89973	up	1.97241	down	---NA---		conserved unknown protein [Ectocarpus siliculosus]	1.28123e-66
CUST_65025_PI422552764	contig00919	0.000310678	2.34246	up	2.85205	down	1.38349	up	4.70635	down	---NA---		conserved unknown protein [Ectocarpus siliculosus]	1.28123e-66
CUST_46003_PI422552764	contig00921	4.93364e-06	4.96298	down	1.40683	down	1.70469	down	1.09037	up	---NA---		---NA---
CUST_46004_PI422552764	contig00921	4.19506e-07	4.44711	down	1.12869	down	1.2783	down	1.25317	up	---NA---		---NA---
CUST_46005_PI422552764	contig00921	2.27313e-06	4.74628	down	1.15534	down	1.38475	down	1.29227	up	---NA---		---NA---
CUST_66529_PI422552764	contig00924	2.3519e-05	2.19709	up	1.24571	up	1.01553	down	1.24346	up	---NA---		conserved unknown protein [Ectocarpus siliculosus]	2.22279e-36
CUST_66530_PI422552764	contig00924	4.04691e-05	2.10745	up	1.1089	up	1.09943	down	1.18556	up	---NA---		conserved unknown protein [Ectocarpus siliculosus]	2.22279e-36
CUST_66531_PI422552764	contig00924	4.96247e-06	2.07804	up	1.03518	up	1.08369	down	1.18991	up	---NA---		conserved unknown protein [Ectocarpus siliculosus]	2.22279e-36
CUST_47968_PI422552764	contig00925	1.53879e-10	14.4654	up	1.37192	down	2.47805	up	1.73027	down	---NA---		---NA---
CUST_47969_PI422552764	contig00925	9.84173e-10	7.68874	up	1.196	down	2.22968	up	1.47523	down	---NA---		---NA---
CUST_47970_PI422552764	contig00925	1.64651e-06	9.27655	up	3.45325	down	2.22742	up	5.02535	down	---NA---		---NA---
CUST_76114_PI422552764	contig00929	0.000252039	3.65645	down	1.80472	up	1.0436	down	1.16971	up	---NA---		---NA---
CUST_76115_PI422552764	contig00929	1.61653e-06	4.05855	down	2.54565	up	1.25005	down	1.0344	up	---NA---		---NA---
CUST_76116_PI422552764	contig00929	2.09341e-06	2.95336	down	1.5936	up	1.12597	down	1.12956	up	---NA---		---NA---
CUST_46693_PI422552764	contig00931	3.52553e-05	3.03811	up	1.45922	up	1.19194	up	1.04267	down	---NA---		---NA---
CUST_58033_PI422552764	contig00935	3.22817e-06	3.47107	down	1.10262	up	1.54273	down	1.33326	down	---NA---		---NA---
CUST_58034_PI422552764	contig00935	5.48408e-07	3.32951	down	1.15274	up	1.51853	down	1.30593	down	---NA---		---NA---
CUST_58035_PI422552764	contig00935	7.58909e-07	3.80066	down	1.03954	down	1.52212	down	1.27027	down	---NA---		---NA---
CUST_24800_PI422552764	contig00937	6.42209e-07	2.21925	up	1.5922	down	1.11578	down	2.68713	down	---NA---		---NA---
CUST_24801_PI422552764	contig00937	7.92063e-07	2.57578	up	1.31593	down	1.00541	up	2.16869	down	---NA---		---NA---
CUST_24802_PI422552764	contig00937	8.9817e-07	2.65204	up	1.37225	down	1.00907	up	2.15601	down	---NA---		---NA---
CUST_8541_PI422552764	contig00938	0.00291249	1.14368	down	2.517	up	1.29862	up	1.44458	up	---NA---		---NA---
CUST_40408_PI422552764	contig00939	3.9116e-05	1.94684	up	2.13646	down	1.36441	up	1.22107	down	---NA---		---NA---
CUST_40409_PI422552764	contig00939	1.74492e-05	2.12326	up	2.34466	down	1.59914	up	1.07749	down	---NA---		---NA---
CUST_40410_PI422552764	contig00939	2.84209e-07	2.3921	up	2.33056	down	1.6494	up	1.16366	down	---NA---		---NA---
CUST_28586_PI422552764	contig00940	8.67409e-05	2.2012	down	1.40042	up	1.35467	down	1.15294	up	---NA---		---NA---
CUST_28587_PI422552764	contig00940	0.00025493	2.94841	down	1.19382	up	1.30369	down	1.14089	up	---NA---		---NA---
CUST_16985_PI422552764	contig00942	5.08531e-07	3.74063	down	1.77776	down	1.37956	down	1.16239	down	---NA---		---NA---
CUST_16986_PI422552764	contig00942	4.84239e-06	3.52831	down	1.67293	down	1.37119	down	1.18508	down	---NA---		---NA---
CUST_16987_PI422552764	contig00942	2.58006e-05	2.94141	down	1.84172	down	1.25858	down	1.10563	down	---NA---		---NA---
CUST_77680_PI422552764	contig00943	9.27456e-05	2.92345	up	1.43552	down	1.26344	up	1.44152	down	polx_tobac ame: full=retrovirus-related pol polyprotein from transposon tnt 1-94 includes: ame: full=protease includes: ame: full=reverse transcriptase includes: ame: full=endonuclease	4.48102e-68	copia-type -like	2.71208e-85
CUST_77681_PI422552764	contig00943	2.04932e-11	2.49518	up	2.02431	down	1.82767	up	2.1971	down	polx_tobac ame: full=retrovirus-related pol polyprotein from transposon tnt 1-94 includes: ame: full=protease includes: ame: full=reverse transcriptase includes: ame: full=endonuclease	4.48102e-68	copia-type -like	2.71208e-85
CUST_77682_PI422552764	contig00943	1.92548e-10	2.13977	up	1.71594	down	1.54673	up	1.88266	down	polx_tobac ame: full=retrovirus-related pol polyprotein from transposon tnt 1-94 includes: ame: full=protease includes: ame: full=reverse transcriptase includes: ame: full=endonuclease	4.48102e-68	copia-type -like	2.71208e-85
CUST_43610_PI422552764	contig00944	1.60122e-05	1.53124	up	2.35612	down	1.18719	down	1.50974	down	---NA---		---NA---
CUST_43611_PI422552764	contig00944	3.47092e-05	1.20494	up	2.40148	down	1.02955	up	1.12679	down	---NA---		---NA---
CUST_21197_PI422552764	contig00952	4.75991e-09	2.57614	up	2.72844	down	1.66858	up	2.9426	down	---NA---		---NA---
CUST_21198_PI422552764	contig00952	5.50596e-08	2.82581	up	2.83925	down	1.86542	up	2.67683	down	---NA---		---NA---
CUST_21199_PI422552764	contig00952	1.47438e-09	2.71925	up	2.98311	down	1.77149	up	2.59716	down	---NA---		---NA---
CUST_69112_PI422552764	contig00961	0.00159035	2.46593	up	1.73441	down	2.1863	up	1.3297	down	---NA---		---NA---
CUST_69113_PI422552764	contig00961	0.00327048	2.6774	up	1.24347	down	2.45967	up	1.17658	up	---NA---		---NA---
CUST_18559_PI422552764	contig00964	0.00119176	1.56583	up	2.0092	up	1.12683	down	1.23389	up	---NA---		---NA---
CUST_51847_PI422552764	contig00965	4.33938e-05	12.5497	up	1.80672	up	3.79789	up	1.46778	up	---NA---		---NA---
CUST_51848_PI422552764	contig00965	1.35163e-05	7.39254	up	1.40485	up	1.1783	up	1.25215	down	---NA---		---NA---
CUST_51849_PI422552764	contig00965	9.66745e-10	20.0278	up	3.51089	up	6.23324	up	2.03255	up	---NA---		---NA---
CUST_52834_PI422552764	contig00966	1.01454e-06	4.09293	up	1.12834	down	2.45821	up	1.47396	down	---NA---		---NA---
CUST_52835_PI422552764	contig00966	2.00885e-06	3.56171	up	1.36997	down	2.16089	up	1.59412	down	---NA---		---NA---
CUST_52836_PI422552764	contig00966	6.9446e-07	3.63081	up	1.25834	down	2.2675	up	1.79396	down	---NA---		---NA---
CUST_15722_PI422552764	contig00968	8.55817e-07	4.37067	up	1.54874	down	2.11048	up	1.43052	down	---NA---		---NA---
CUST_15723_PI422552764	contig00968	7.6957e-06	5.2869	up	1.65697	down	2.54385	up	1.38889	down	---NA---		---NA---
CUST_15724_PI422552764	contig00968	1.28452e-06	4.80875	up	1.51655	down	2.27904	up	1.75677	down	---NA---		---NA---
CUST_30527_PI422552764	contig00970	4.4037e-06	3.12607	up	1.61144	down	1.7668	up	1.62304	down	---NA---		---NA---
CUST_30528_PI422552764	contig00970	2.54462e-06	4.80895	up	1.20054	down	2.1362	up	1.20076	down	---NA---		---NA---
CUST_30529_PI422552764	contig00970	0.000310891	4.77933	up	1.37369	down	1.65016	up	2.14079	down	---NA---		---NA---
CUST_71215_PI422552764	contig00972	5.9893e-10	2.26581	down	3.29409	up	1.32577	down	2.09053	up	---NA---		---NA---
CUST_71216_PI422552764	contig00972	4.06937e-08	1.99026	down	2.66649	up	1.36311	down	1.90661	up	---NA---		---NA---
CUST_71217_PI422552764	contig00972	1.86025e-07	1.86824	down	2.2536	up	1.15457	down	1.58289	up	---NA---		---NA---
CUST_46007_PI422552764	contig00973	0.00376174	2.95715	up	1.26713	down	2.27347	up	1.85659	down	---NA---		---NA---
CUST_46008_PI422552764	contig00973	0.00193196	1.78218	up	1.66418	down	1.0476	down	2.68058	down	---NA---		---NA---
CUST_61286_PI422552764	contig00974	3.84028e-05	2.16555	up	1.56086	up	1.04855	down	1.1028	up	---NA---		---NA---
CUST_71803_PI422552764	contig00979	1.78398e-07	2.59208	down	1.53829	up	1.47596	up	1.0783	up	---NA---		---NA---
CUST_71804_PI422552764	contig00979	1.03178e-06	2.5743	down	1.16847	up	1.35138	up	1.17481	down	---NA---		---NA---
CUST_71805_PI422552764	contig00979	1.14324e-05	2.19227	down	1.13893	up	1.49453	up	1.07102	down	---NA---		---NA---
CUST_18365_PI422552764	contig00980	0.00305248	2.79612	up	1.55922	up	1.29716	up	1.90885	up	---NA---		---NA---
CUST_18366_PI422552764	contig00980	0.00102339	3.26423	up	1.52349	up	1.18562	up	1.34679	up	---NA---		---NA---
CUST_18367_PI422552764	contig00980	0.000119755	3.83352	up	1.58066	up	1.32209	up	1.90285	up	---NA---		---NA---
CUST_70981_PI422552764	contig00982	0.000808117	1.84573	up	3.66371	down	1.11292	down	1.54431	down	---NA---		---NA---
CUST_70983_PI422552764	contig00982	2.36932e-05	2.52734	up	2.83623	down	1.3743	up	1.10424	up	---NA---		---NA---
CUST_51652_PI422552764	contig00987	0.000597916	3.50595	down	1.3462	up	1.95324	down	1.03155	down	dxs_rhocs ame: full=1-deoxy-d-xylulose-5-phosphate synthase ame: full=1-deoxyxylulose-5-phosphate synthase short=dxp synthase short=dxps	8.72148e-39	precursor of synthase dxs 1-deoxy-d-xylulose-5-phosphate synthase	2.79631e-87
CUST_51653_PI422552764	contig00987	5.28373e-05	6.59928	down	1.2936	up	1.87747	down	1.10363	up	dxs_rhocs ame: full=1-deoxy-d-xylulose-5-phosphate synthase ame: full=1-deoxyxylulose-5-phosphate synthase short=dxp synthase short=dxps	8.72148e-39	precursor of synthase dxs 1-deoxy-d-xylulose-5-phosphate synthase	2.79631e-87
CUST_51654_PI422552764	contig00987	5.97374e-06	9.71991	down	1.22741	up	2.16526	down	1.00163	up	dxs_rhocs ame: full=1-deoxy-d-xylulose-5-phosphate synthase ame: full=1-deoxyxylulose-5-phosphate synthase short=dxp synthase short=dxps	8.72148e-39	precursor of synthase dxs 1-deoxy-d-xylulose-5-phosphate synthase	2.79631e-87
CUST_76708_PI422552764	contig00992	0.00117224	1.66181	up	3.77094	down	1.24618	up	1.63314	down	---NA---		conserved unknown protein [Ectocarpus siliculosus]	4.2381e-158
CUST_76709_PI422552764	contig00992	0.000853318	1.7182	up	3.41595	down	1.22722	up	1.64015	down	---NA---		conserved unknown protein [Ectocarpus siliculosus]	4.2381e-158
CUST_76710_PI422552764	contig00992	0.000556818	1.72076	up	2.99462	down	1.23107	up	1.58255	down	---NA---		conserved unknown protein [Ectocarpus siliculosus]	4.2381e-158
CUST_24593_PI422552764	contig00997	6.74098e-08	8.24385	down	1.32021	down	1.46679	down	1.07047	down	---NA---		---NA---
CUST_24594_PI422552764	contig00997	1.1568e-07	8.1901	down	1.31996	down	1.49146	down	1.07743	down	---NA---		---NA---
CUST_24595_PI422552764	contig00997	1.16231e-07	7.95423	down	1.34635	down	1.44	down	1.05069	down	---NA---		---NA---
CUST_37616_PI422552764	contig00998	0.00250728	2.61922	down	1.59702	down	1.29462	down	1.61223	down	---NA---		hypothetical protein [Ectocarpus siliculosus]	1.72344e-17
CUST_29315_PI422552764	contig00999	6.24405e-06	2.282	down	1.42186	up	1.28043	down	1.44764	up	---NA---		---NA---
CUST_29316_PI422552764	contig00999	2.67886e-06	2.30427	down	1.34212	up	1.12348	down	1.49595	up	---NA---		---NA---
CUST_29317_PI422552764	contig00999	1.25144e-06	2.28101	down	1.315	up	1.19056	down	1.48685	up	---NA---		---NA---
CUST_44971_PI422552764	contig01002	2.45306e-09	28.9056	down	2.18733	down	2.68342	down	1.22751	down	---NA---		---NA---
CUST_44972_PI422552764	contig01002	1.31759e-09	28.4372	down	2.01701	down	2.49664	down	1.17759	down	---NA---		---NA---
CUST_44973_PI422552764	contig01002	1.99079e-09	25.9022	down	1.96212	down	2.57849	down	1.19596	down	---NA---		---NA---
CUST_54516_PI422552764	contig01003	7.19315e-05	2.57817	up	1.46696	down	1.2138	down	1.95588	down	---NA---		---NA---
CUST_11748_PI422552764	contig01004	0.000276113	2.00159	up	1.24744	down	2.13208	up	1.47303	down	---NA---		---NA---
CUST_11749_PI422552764	contig01004	4.13905e-05	2.0178	up	1.41865	down	2.09336	up	1.53516	down	---NA---		---NA---
CUST_31148_PI422552764	contig01005	0.000760377	2.66068	up	1.49869	up	1.33545	up	1.50513	up	---NA---		---NA---
CUST_54910_PI422552764	contig01006	0.000444699	1.5859	up	1.46779	down	1.42456	up	2.00984	down	---NA---		---NA---
CUST_74479_PI422552764	contig01008	2.43076e-06	2.55489	down	2.10582	down	1.5779	down	1.03684	up	---NA---		---NA---
CUST_74480_PI422552764	contig01008	5.92018e-05	2.25768	down	2.1328	down	1.46563	down	1.0287	up	---NA---		---NA---
CUST_74481_PI422552764	contig01008	8.54916e-06	2.34111	down	2.27442	down	1.58988	down	1.02677	down	---NA---		---NA---
CUST_60211_PI422552764	contig01011	0.000877717	4.04979	up	1.15492	down	1.66436	up	1.44212	down	---NA---		PREDICTED: hypothetical protein LOC100493047 [Xenopus (Silurana) tropicalis]	1.79823e-09
CUST_60213_PI422552764	contig01011	4.13207e-05	2.64136	up	1.10565	up	1.16928	up	2.35058	down	---NA---		PREDICTED: hypothetical protein LOC100493047 [Xenopus (Silurana) tropicalis]	1.79823e-09
CUST_19690_PI422552764	contig01014	0.00121304	2.57653	down	1.14216	down	1.45235	down	1.06518	down	---NA---		---NA---
CUST_48034_PI422552764	contig01016	0.000908023	1.03122	up	2.5199	up	1.30842	down	1.62592	up	---NA---		---NA---
CUST_4_PI422552764	contig01017	9.14202e-06	1.32578	down	1.51612	up	1.28734	up	2.16434	up	---NA---		---NA---
CUST_5_PI422552764	contig01017	2.35864e-05	1.28301	down	1.40952	up	1.32848	up	2.19436	up	---NA---		---NA---
CUST_6_PI422552764	contig01017	1.29764e-05	1.40048	down	1.42776	up	1.23465	up	2.02925	up	---NA---		---NA---
CUST_66929_PI422552764	contig01018	0.00100857	2.64152	up	1.48916	up	1.26768	down	1.01404	down	---NA---		---NA---
CUST_53488_PI422552764	contig01019	2.79603e-05	5.20462	up	1.71891	up	1.21023	up	2.1131	up	---NA---		---NA---
CUST_53490_PI422552764	contig01019	0.000526162	4.21194	up	2.53377	up	1.28687	up	2.23697	up	---NA---		---NA---
CUST_51220_PI422552764	contig01021	0.000461991	3.19365	up	1.03592	down	1.66752	down	1.52427	down	---NA---		---NA---
CUST_51222_PI422552764	contig01021	0.00176305	3.37604	up	1.84795	up	1.75225	down	1.38018	down	---NA---		---NA---
CUST_53368_PI422552764	contig01022	1.82283e-07	2.00593	down	2.49453	up	1.69527	down	1.30249	up	---NA---		---NA---
CUST_53369_PI422552764	contig01022	1.54421e-06	2.06366	down	2.65224	up	1.51065	down	1.309	up	---NA---		---NA---
CUST_53370_PI422552764	contig01022	1.55255e-07	2.18088	down	2.57175	up	1.73029	down	1.31189	up	---NA---		---NA---
CUST_13235_PI422552764	contig01025	1.08486e-08	6.16462	down	1.06962	down	2.01374	down	1.28402	down	---NA---		---NA---
CUST_13236_PI422552764	contig01025	1.00519e-07	5.06558	down	1.12511	down	1.91613	down	1.20514	down	---NA---		---NA---
CUST_13237_PI422552764	contig01025	4.8435e-08	3.90603	down	1.0051	up	1.68182	down	1.21248	down	---NA---		---NA---
CUST_55535_PI422552764	contig01027	0.000685435	2.23513	down	1.20374	down	1.15981	down	1.61804	down	---NA---		---NA---
CUST_55536_PI422552764	contig01027	3.05164e-05	2.33904	down	1.15323	down	1.10247	down	1.58452	down	---NA---		---NA---
CUST_77413_PI422552764	contig01028	2.92725e-07	4.62744	up	7.41007	down	1.62246	up	2.9678	down	---NA---		---NA---
CUST_77414_PI422552764	contig01028	8.03811e-07	5.39262	up	7.88185	down	1.71041	up	3.07107	down	---NA---		---NA---
CUST_77415_PI422552764	contig01028	8.5057e-06	4.36194	up	2.72275	down	1.38557	up	2.68126	down	---NA---		---NA---
CUST_57194_PI422552764	contig01032	0.000423021	2.46797	up	2.90948	up	1.28514	up	3.162	up	---NA---		---NA---
CUST_57195_PI422552764	contig01032	4.11567e-05	2.38227	up	3.03597	up	2.03626	up	3.75067	up	---NA---		---NA---
CUST_31967_PI422552764	contig01034	0.00127217	3.12864	up	1.03951	down	1.27066	up	1.27839	down	---NA---		---NA---
CUST_31968_PI422552764	contig01034	0.00159981	3.56461	up	1.2159	down	1.09353	up	1.21362	down	---NA---		---NA---
CUST_31969_PI422552764	contig01034	0.00152717	3.33139	up	1.11774	up	1.4271	up	1.15259	down	---NA---		---NA---
CUST_69415_PI422552764	contig01035	2.85549e-05	1.15279	up	2.41987	up	1.24618	down	1.828	up	---NA---		conserved unknown protein [Ectocarpus siliculosus]	7.26756e-65
CUST_69417_PI422552764	contig01035	3.59862e-05	1.14442	up	2.50665	up	1.65719	down	1.41726	up	---NA---		conserved unknown protein [Ectocarpus siliculosus]	7.26756e-65
CUST_65605_PI422552764	contig01036	4.48431e-06	1.81093	up	2.44598	down	1.40422	up	1.77474	down	---NA---		---NA---
CUST_4362_PI422552764	contig01039	7.65086e-07	3.34836	up	1.27151	down	2.26179	up	1.32544	down	---NA---		---NA---
CUST_4363_PI422552764	contig01039	1.77377e-06	2.83612	up	1.31256	down	1.97697	up	1.61975	down	---NA---		---NA---
CUST_4364_PI422552764	contig01039	0.00011194	2.45965	up	1.37316	down	1.55221	up	2.20809	down	---NA---		---NA---
CUST_54127_PI422552764	contig01040	5.93174e-06	1.92191	up	5.70465	up	1.2773	up	3.21115	up	---NA---		---NA---
CUST_54128_PI422552764	contig01040	7.89295e-08	1.7124	up	4.92476	up	1.11141	down	2.23959	up	---NA---		---NA---
CUST_54129_PI422552764	contig01040	2.16332e-09	2.4412	up	5.96324	up	1.32038	up	3.36161	up	---NA---		---NA---
CUST_77245_PI422552764	contig01041	1.07874e-05	1.55983	up	3.2739	up	1.35095	up	1.6882	up	yl8h_schpo ame: full=probable intramembrane protease	8.80556e-23	minor histocompatibility antigen	8.1954e-158
CUST_77246_PI422552764	contig01041	7.53319e-05	1.38292	up	3.14223	up	1.05482	up	1.36358	up	yl8h_schpo ame: full=probable intramembrane protease	8.80556e-23	minor histocompatibility antigen	8.1954e-158
CUST_77247_PI422552764	contig01041	4.96684e-05	1.22131	up	3.21706	up	1.17987	up	1.57412	up	yl8h_schpo ame: full=probable intramembrane protease	8.80556e-23	minor histocompatibility antigen	8.1954e-158
CUST_54175_PI422552764	contig01042	0.000888388	4.60136	up	1.14744	up	2.06354	up	1.31116	up	---NA---		---NA---
CUST_54177_PI422552764	contig01042	2.44469e-05	1.79847	up	2.04049	down	1.22606	up	1.68974	down	---NA---		---NA---
CUST_29981_PI422552764	contig01044	8.57821e-09	3.3166	down	1.12754	up	1.59488	down	1.30289	up	---NA---		---NA---
CUST_29982_PI422552764	contig01044	5.03782e-08	3.39716	down	1.11385	up	1.58727	down	1.30859	up	---NA---		---NA---
CUST_29983_PI422552764	contig01044	2.16305e-08	3.41956	down	1.12838	up	1.62455	down	1.25788	up	---NA---		---NA---
CUST_45583_PI422552764	contig01047	6.0207e-06	2.19928	up	1.39684	down	1.35845	up	1.17753	down	---NA---		---NA---
CUST_45584_PI422552764	contig01047	1.0145e-07	2.49019	up	1.47151	down	1.41946	up	1.14118	down	---NA---		---NA---
CUST_45585_PI422552764	contig01047	1.36406e-07	2.25059	up	1.46194	down	1.36071	up	1.11687	down	---NA---		---NA---
CUST_3381_PI422552764	contig01048	1.11386e-07	2.41296	up	1.61314	down	1.22096	up	1.51375	down	---NA---		---NA---
CUST_3382_PI422552764	contig01048	6.64394e-09	3.62118	up	1.29554	down	1.80021	up	1.10166	down	---NA---		---NA---
CUST_3383_PI422552764	contig01048	7.12491e-07	3.37817	up	1.37189	down	1.86312	up	1.07573	down	---NA---		---NA---
CUST_68499_PI422552764	contig01050	2.53591e-06	2.47134	up	2.80887	down	1.70145	up	1.40439	down	---NA---		---NA---
CUST_59732_PI422552764	contig01052	0.00016812	6.1846	down	4.52255	down	3.46518	down	1.67728	down	---NA---		---NA---
CUST_59733_PI422552764	contig01052	7.23086e-06	55.046	down	12.1153	down	8.41157	down	1.90689	down	---NA---		---NA---
CUST_53730_PI422552764	contig01055	0.00198156	2.00716	up	1.37621	down	1.29896	down	1.36389	down	---NA---		---NA---
CUST_77728_PI422552764	contig01056	7.81884e-05	2.43981	up	1.1011	down	1.93383	up	1.31004	down	ef1g3_orysj ame: full=elongation factor 1-gamma 3 short=ef-1-gamma 3 ame: full=eef-1b gamma 3	9.42901e-74	elongation factor 1-	0
CUST_77729_PI422552764	contig01056	2.65301e-06	2.53491	up	1.05496	down	1.89395	up	1.33664	down	ef1g3_orysj ame: full=elongation factor 1-gamma 3 short=ef-1-gamma 3 ame: full=eef-1b gamma 3	9.42901e-74	elongation factor 1-	0
CUST_67502_PI422552764	contig01057	1.3648e-08	7.598	down	3.23476	down	1.7615	down	1.99002	down	---NA---		---NA---
CUST_67503_PI422552764	contig01057	6.8181e-09	7.60598	down	4.19095	down	1.72073	down	1.96157	down	---NA---		---NA---
CUST_29028_PI422552764	contig01058	0.000252725	2.14875	down	1.74076	up	1.66332	down	1.10133	up	---NA---		---NA---
CUST_70332_PI422552764	contig01060	0.000374782	1.70074	up	2.24429	down	1.28732	down	1.3402	down	---NA---		copper resistance b precursor	9.78851e-07
CUST_7983_PI422552764	contig01064	0.00239058	1.46663	up	2.00264	down	1.98926	down	2.42634	down	---NA---		---NA---
CUST_73999_PI422552764	contig01065	2.23311e-06	4.14458	down	1.71522	up	1.00257	up	2.11313	up	---NA---		---NA---
CUST_74000_PI422552764	contig01065	3.48416e-06	4.84767	down	1.63245	up	1.11608	down	2.24682	up	---NA---		---NA---
CUST_74001_PI422552764	contig01065	2.90026e-05	4.3257	down	1.58281	up	1.08565	down	2.14362	up	---NA---		---NA---
CUST_76633_PI422552764	contig01066	0.000410633	1.39735	up	2.29992	down	1.04277	up	1.37272	down	prxv_ascno ame: full=vanadium haloperoxidase ame: full=v-bpo	1.93575e-50	vanadium-dependent bromoperoxidase 2	3.6595e-138
CUST_76634_PI422552764	contig01066	6.52667e-05	1.37613	up	2.55216	down	1.02546	up	1.46706	down	prxv_ascno ame: full=vanadium haloperoxidase ame: full=v-bpo	1.93575e-50	vanadium-dependent bromoperoxidase 2	3.6595e-138
CUST_76635_PI422552764	contig01066	0.000196518	1.32125	up	2.22823	down	1.08275	up	1.3581	down	prxv_ascno ame: full=vanadium haloperoxidase ame: full=v-bpo	1.93575e-50	vanadium-dependent bromoperoxidase 2	3.6595e-138
CUST_56074_PI422552764	contig01067	0.00211976	7.37338	down	5.22201	down	3.8557	down	2.43368	down	prxv_ascno ame: full=vanadium haloperoxidase ame: full=v-bpo	1.07101e-25	vanadium-dependent bromoperoxidase 1	5.22577e-89
CUST_56075_PI422552764	contig01067	0.0011094	6.70602	down	4.11732	down	3.14027	down	2.02864	down	prxv_ascno ame: full=vanadium haloperoxidase ame: full=v-bpo	1.07101e-25	vanadium-dependent bromoperoxidase 1	5.22577e-89
CUST_56076_PI422552764	contig01067	0.00150714	6.492	down	3.82702	down	3.29221	down	2.09895	down	prxv_ascno ame: full=vanadium haloperoxidase ame: full=v-bpo	1.07101e-25	vanadium-dependent bromoperoxidase 1	5.22577e-89
CUST_34033_PI422552764	contig01068	0.000555729	7.81442	down	5.34205	down	4.27488	down	2.34907	down	prxv_ascno ame: full=vanadium haloperoxidase ame: full=v-bpo	1.28494e-22	vanadium-dependent bromoperoxidase 2	6.03203e-55
CUST_34034_PI422552764	contig01068	0.00201228	9.00427	down	3.47256	down	3.11416	down	1.92084	down	prxv_ascno ame: full=vanadium haloperoxidase ame: full=v-bpo	1.28494e-22	vanadium-dependent bromoperoxidase 2	6.03203e-55
CUST_34035_PI422552764	contig01068	0.00151211	8.76783	down	3.15814	down	3.01886	down	1.88118	down	prxv_ascno ame: full=vanadium haloperoxidase ame: full=v-bpo	1.28494e-22	vanadium-dependent bromoperoxidase 2	6.03203e-55
CUST_69502_PI422552764	contig01069	1.38672e-07	2.17327	up	8.11471	down	2.00641	up	2.54297	down	---NA---		---NA---
CUST_69503_PI422552764	contig01069	4.1715e-08	2.29228	up	11.9888	down	1.946	up	3.21839	down	---NA---		---NA---
CUST_69504_PI422552764	contig01069	2.26616e-06	1.81827	up	10.4338	down	1.66302	up	3.1096	down	---NA---		---NA---
CUST_75025_PI422552764	contig01070	3.8058e-08	32.9773	up	1.24062	down	25.6748	up	3.50558	down	---NA---		---NA---
CUST_75026_PI422552764	contig01070	1.56177e-07	11.3797	up	3.51721	down	8.7604	up	7.75886	down	---NA---		---NA---
CUST_75027_PI422552764	contig01070	9.12123e-05	3.15679	up	1.19994	down	4.13186	up	4.52941	down	---NA---		---NA---
CUST_75194_PI422552764	contig01071	0.00166071	3.27247	down	3.90738	down	1.74016	up	1.28029	down	---NA---		---NA---
CUST_71950_PI422552764	contig01083	1.99205e-07	6.93874	down	3.37475	up	2.73962	down	2.40052	up	---NA---		---NA---
CUST_71951_PI422552764	contig01083	5.00801e-07	19.0693	down	2.86433	up	3.30688	down	1.64966	up	---NA---		---NA---
CUST_71952_PI422552764	contig01083	2.63615e-08	14.8728	down	3.08204	up	2.96179	down	1.84834	up	---NA---		---NA---
CUST_78430_PI422552764	contig01084	5.60136e-05	6.02266	up	1.23275	up	3.81027	up	1.38256	down	idhp_macfa ame: full=isocitrate dehydrogenase mitochondrial short=idh ame: full=oxalosuccinate decarboxylase ame: full=nadp(+)-specific icdh ame: full=idp ame: full=icd-m flags: precursor	2.06248e-156	isocitrate mitochondrial precursor	0
CUST_78431_PI422552764	contig01084	3.47248e-05	4.35085	up	1.01103	up	3.14954	up	1.04725	down	idhp_macfa ame: full=isocitrate dehydrogenase mitochondrial short=idh ame: full=oxalosuccinate decarboxylase ame: full=nadp(+)-specific icdh ame: full=idp ame: full=icd-m flags: precursor	2.06248e-156	isocitrate mitochondrial precursor	0
CUST_78432_PI422552764	contig01084	0.000320299	4.90752	up	1.27574	up	2.85528	up	1.16173	down	idhp_macfa ame: full=isocitrate dehydrogenase mitochondrial short=idh ame: full=oxalosuccinate decarboxylase ame: full=nadp(+)-specific icdh ame: full=idp ame: full=icd-m flags: precursor	2.06248e-156	isocitrate mitochondrial precursor	0
CUST_68427_PI422552764	contig01087	0.000843146	4.07309	down	1.51922	down	2.17096	down	1.24791	up	---NA---		---NA---
CUST_44413_PI422552764	contig01089	7.31886e-07	1.12744	down	4.43003	up	1.84971	up	1.66273	up	---NA---		---NA---
CUST_44414_PI422552764	contig01089	8.8616e-07	1.12894	down	4.36072	up	1.86574	up	1.69453	up	---NA---		---NA---
CUST_44415_PI422552764	contig01089	1.35544e-06	1.10643	down	4.3692	up	1.91208	up	1.73282	up	---NA---		---NA---
CUST_54073_PI422552764	contig01090	0.000402095	1.35143	down	2.33617	up	1.23553	up	1.28073	up	---NA---		---NA---
CUST_54074_PI422552764	contig01090	0.000114834	1.4938	down	2.29466	up	1.13025	up	1.21488	up	---NA---		---NA---
CUST_54075_PI422552764	contig01090	5.29007e-05	1.29485	down	2.33382	up	1.29362	up	1.32424	up	---NA---		---NA---
CUST_74327_PI422552764	contig01093	0.000137412	2.19429	up	1.04719	up	1.38769	up	1.32636	down	pxmp2_bovin ame: full=peroxisomal membrane protein 2	9.93348e-20	peroxisomal membrane protein mpv17 and related proteins	2.21614e-68
CUST_74328_PI422552764	contig01093	8.05627e-07	2.45516	up	1.10255	down	1.54884	up	1.36051	down	pxmp2_bovin ame: full=peroxisomal membrane protein 2	9.93348e-20	peroxisomal membrane protein mpv17 and related proteins	2.21614e-68
CUST_78061_PI422552764	contig01095	0.000557449	2.23936	up	1.15308	up	1.68393	up	1.34138	up	sywc_rat ame: full=tryptophanyl-trna cytoplasmic ame: full=tryptophan--trna ligase short= contains: ame: full=t1- contains: ame: full=t2-	5.65632e-64	tryptophanyl-trna synthetase	1.9256e-116
CUST_78062_PI422552764	contig01095	0.00184084	2.25599	up	1.15133	up	1.61828	up	1.12824	up	sywc_rat ame: full=tryptophanyl-trna cytoplasmic ame: full=tryptophan--trna ligase short= contains: ame: full=t1- contains: ame: full=t2-	5.65632e-64	tryptophanyl-trna synthetase	1.9256e-116
CUST_78063_PI422552764	contig01095	0.00212352	2.27418	up	1.24743	up	1.65279	up	1.16291	up	sywc_rat ame: full=tryptophanyl-trna cytoplasmic ame: full=tryptophan--trna ligase short= contains: ame: full=t1- contains: ame: full=t2-	5.65632e-64	tryptophanyl-trna synthetase	1.9256e-116
CUST_29318_PI422552764	contig01097	0.0015694	1.30302	down	1.21057	down	3.47273	down	1.90685	down	---NA---		---NA---
CUST_4782_PI422552764	contig01098	6.9446e-07	7.03746	up	1.02257	down	4.8024	up	1.41415	down	---NA---		---NA---
CUST_4784_PI422552764	contig01098	2.00815e-06	8.45752	up	1.24877	up	6.25818	up	1.06446	up	---NA---		---NA---
CUST_72280_PI422552764	contig01102	2.61303e-05	1.02979	up	3.49677	up	1.49234	down	1.22667	up	ntaq1_xenla ame: full=protein n-terminal glutamine amidohydrolase ame: full=protein nh2-terminal glutamine deamidase short=n-terminal gln amidase short=nt -amidase ame: full=wdyhv motif-containing protein 1	1.59319e-31	uncharacterized protein c8orf32-like protein	1.61005e-32
CUST_72281_PI422552764	contig01102	0.000943694	1.03259	down	3.13565	up	1.23197	down	1.15718	up	ntaq1_xenla ame: full=protein n-terminal glutamine amidohydrolase ame: full=protein nh2-terminal glutamine deamidase short=n-terminal gln amidase short=nt -amidase ame: full=wdyhv motif-containing protein 1	1.59319e-31	uncharacterized protein c8orf32-like protein	1.61005e-32
CUST_72282_PI422552764	contig01102	0.000109692	1.15865	down	3.70248	up	1.70268	down	1.1558	up	ntaq1_xenla ame: full=protein n-terminal glutamine amidohydrolase ame: full=protein nh2-terminal glutamine deamidase short=n-terminal gln amidase short=nt -amidase ame: full=wdyhv motif-containing protein 1	1.59319e-31	uncharacterized protein c8orf32-like protein	1.61005e-32
CUST_13709_PI422552764	contig01103	0.000637536	4.06406	up	5.32608	up	2.96827	up	1.53713	up	---NA---		---NA---
CUST_13711_PI422552764	contig01103	2.19243e-06	2.94179	up	3.38401	up	2.15202	up	1.73998	up	---NA---		---NA---
CUST_78242_PI422552764	contig01106	1.04687e-05	1.10355	up	3.47427	down	1.32213	up	2.234	down	---NA---		dermatan 4-sulfotransferase-1	4.49971e-74
CUST_78243_PI422552764	contig01106	1.39406e-05	3.45763	down	2.43192	down	1.08003	up	1.97582	down	---NA---		dermatan 4-sulfotransferase-1	4.49971e-74
CUST_71413_PI422552764	contig01107	3.35038e-06	3.01629	down	1.26215	down	1.16088	down	1.08398	up	---NA---		---NA---
CUST_71414_PI422552764	contig01107	4.01267e-06	2.56322	down	1.44923	down	1.10584	down	1.11158	up	---NA---		---NA---
CUST_71415_PI422552764	contig01107	6.43082e-05	2.41097	down	1.02732	down	1.12234	down	1.08087	up	---NA---		---NA---
CUST_35551_PI422552764	contig01108	4.34619e-06	2.57185	down	1.00007	up	1.03508	down	1.37347	up	---NA---		---NA---
CUST_35552_PI422552764	contig01108	1.02964e-05	2.6339	down	1.14932	up	1.05658	down	1.37805	up	---NA---		---NA---
CUST_35553_PI422552764	contig01108	6.34935e-06	2.54704	down	1.05383	down	1.18959	down	1.1595	up	---NA---		---NA---
CUST_75934_PI422552764	contig01112	0.00184899	3.67372	up	2.28007	up	1.69077	up	1.30778	up	---NA---		---NA---
CUST_75935_PI422552764	contig01112	0.000238546	4.14078	up	2.90404	up	1.43485	up	1.05882	up	---NA---		---NA---
CUST_75936_PI422552764	contig01112	2.42594e-05	2.54444	up	1.54589	up	1.3978	up	1.30409	down	---NA---		---NA---
CUST_65738_PI422552764	contig01113	0.000552889	4.30844	up	1.48573	up	1.07656	up	2.19945	up	---NA---		---NA---
CUST_63754_PI422552764	contig01121	3.75264e-05	2.00689	up	1.00412	down	1.28622	up	1.0489	up	s35a3_human ame: full=udp-n-acetylglucosamine transporter ame: full=golgi udp- c transporter ame: full=solute carrier family 35 member a3	1.20212e-60	protein	1.02e-102
CUST_63756_PI422552764	contig01121	3.23666e-05	2.12924	up	1.28438	down	1.0533	down	1.06396	up	s35a3_human ame: full=udp-n-acetylglucosamine transporter ame: full=golgi udp- c transporter ame: full=solute carrier family 35 member a3	1.20212e-60	protein	1.02e-102
CUST_57856_PI422552764	contig01122	8.24973e-08	4.8722	up	1.28405	down	1.74371	up	1.62837	down	---NA---		---NA---
CUST_57857_PI422552764	contig01122	9.71204e-05	8.22001	up	1.36664	down	2.2109	up	1.49124	down	---NA---		---NA---
CUST_57858_PI422552764	contig01122	1.05641e-05	9.14124	up	1.3872	down	2.06195	up	1.33009	down	---NA---		---NA---
CUST_54022_PI422552764	contig01124	0.000424263	1.30985	down	2.02882	down	1.03061	up	1.1522	up	---NA---		---NA---
CUST_72649_PI422552764	contig01125	1.04836e-06	4.95775	up	6.39034	down	2.07702	up	3.23488	down	---NA---		mannuronan c-5-epimerase	3.39808e-94
CUST_72650_PI422552764	contig01125	2.95582e-06	4.43778	up	8.56081	down	1.82733	up	3.04107	down	---NA---		mannuronan c-5-epimerase	3.39808e-94
CUST_72651_PI422552764	contig01125	1.51447e-06	3.9932	up	7.53005	down	1.9225	up	2.74028	down	---NA---		mannuronan c-5-epimerase	3.39808e-94
CUST_66951_PI422552764	contig01129	7.3367e-06	1.55233	up	1.94711	down	2.3312	down	3.49298	down	---NA---		mannuronan c-5-epimerase	1.46746e-34
CUST_62267_PI422552764	contig01134	0.000676917	1.53351	up	1.62193	up	3.3875	up	3.92854	up	---NA---		---NA---
CUST_62268_PI422552764	contig01134	0.0010197	1.60483	down	1.29574	up	1.91306	up	2.18434	up	---NA---		---NA---
CUST_61510_PI422552764	contig01137	0.00251864	2.67433	down	1.1919	down	2.41836	down	1.06515	up	---NA---		mannuronan c-5-epimerase	1.99491e-72
CUST_61512_PI422552764	contig01137	0.00259921	2.72188	down	1.12965	down	1.75151	down	1.03017	up	---NA---		mannuronan c-5-epimerase	1.99491e-72
CUST_58036_PI422552764	contig01142	0.00274369	1.17418	down	1.73104	down	1.62834	down	2.22259	down	---NA---		---NA---
CUST_47147_PI422552764	contig01144	1.1904e-10	8.26048	down	4.11234	up	1.67726	down	2.56991	up	---NA---		---NA---
CUST_47148_PI422552764	contig01144	4.20577e-09	2.97986	down	3.21062	up	1.3704	down	2.77569	up	---NA---		---NA---
CUST_46417_PI422552764	contig01146	1.38228e-07	2.59318	up	2.69016	down	1.12957	up	1.16126	down	---NA---		---NA---
CUST_46418_PI422552764	contig01146	9.63735e-07	2.55713	up	1.97591	down	1.21184	up	1.22292	down	---NA---		---NA---
CUST_78364_PI422552764	contig01147	5.9236e-06	2.75941	up	5.16793	up	1.61655	up	1.4118	up	---NA---		---NA---
CUST_78365_PI422552764	contig01147	1.49595e-07	2.38779	up	6.51361	up	1.4628	up	1.41446	up	---NA---		---NA---
CUST_78366_PI422552764	contig01147	0.000348606	1.57849	up	3.2382	up	1.2701	up	1.4747	up	---NA---		---NA---
CUST_67771_PI422552764	contig01149	2.79755e-11	5.07848	down	9.74162	up	2.19424	down	13.3218	up	---NA---		nitrate transporter	3.08288e-51
CUST_67772_PI422552764	contig01149	3.3004e-11	10.1431	down	12.4897	up	2.49815	down	18.398	up	---NA---		nitrate transporter	3.08288e-51
CUST_67773_PI422552764	contig01149	3.04377e-11	11.4815	down	19.7654	up	1.89197	down	22.3949	up	---NA---		nitrate transporter	3.08288e-51
CUST_3789_PI422552764	contig01152	0.0019442	6.48826	down	1.3199	down	1.32981	down	1.45083	down	---NA---		---NA---
CUST_3790_PI422552764	contig01152	0.00265207	6.30582	down	1.15129	down	1.11655	down	1.26049	down	---NA---		---NA---
CUST_3791_PI422552764	contig01152	0.00211807	5.06128	down	1.55115	down	1.21781	down	1.34015	down	---NA---		---NA---
CUST_29762_PI422552764	contig01153	4.81634e-07	12.6353	down	1.51715	down	1.10722	down	1.27039	down	---NA---		anxa6 protein	2.72203e-27
CUST_29763_PI422552764	contig01153	5.49413e-07	14.5012	down	1.5849	down	1.17933	down	1.32977	down	---NA---		anxa6 protein	2.72203e-27
CUST_29764_PI422552764	contig01153	2.65725e-07	16.7791	down	1.58244	down	1.26368	down	1.41207	down	---NA---		anxa6 protein	2.72203e-27
CUST_4124_PI422552764	contig01154	0.00119519	1.58028	up	2.08927	up	1.14037	down	1.00552	up	---NA---		---NA---
CUST_75088_PI422552764	contig01158	0.000295825	2.27785	up	2.20686	up	1.89951	up	1.51556	up	---NA---		tpr repeat protein	8.8111e-111
CUST_75089_PI422552764	contig01158	0.00172392	2.42375	up	2.08104	up	2.0165	up	1.62013	up	---NA---		tpr repeat protein	8.8111e-111
CUST_75090_PI422552764	contig01158	0.000561477	2.39943	up	2.3643	up	2.02271	up	1.60134	up	---NA---		tpr repeat protein	8.8111e-111
CUST_17677_PI422552764	contig01159	0.000357638	3.73905	up	1.1375	down	2.01315	up	1.44506	up	---NA---		---NA---
CUST_77902_PI422552764	contig01165	6.9941e-05	1.36117	up	2.42373	up	1.05486	up	1.66441	up	riba_camff ame: full=gtp cyclohydrolase-2 ame: full=gtp cyclohydrolase ii	6.86215e-43	gtp cyclohydrolase ii	4.14511e-68
CUST_49592_PI422552764	contig01171	0.000218851	2.52742	down	1.59202	down	1.05572	up	1.6423	down	---NA---		---NA---
CUST_9278_PI422552764	contig01172	0.000672441	3.01078	down	1.25817	down	2.34203	down	1.34774	down	---NA---		---NA---
CUST_74944_PI422552764	contig01175	1.24885e-06	4.05125	up	1.61311	down	1.01581	up	1.38746	down	---NA---		---NA---
CUST_74945_PI422552764	contig01175	3.12512e-05	2.54708	up	1.58644	down	1.10258	down	1.31268	down	---NA---		---NA---
CUST_74946_PI422552764	contig01175	3.93551e-06	3.79721	up	1.44073	down	1.06163	down	1.3336	down	---NA---		---NA---
CUST_65487_PI422552764	contig01177	0.00365892	2.61386	up	1.48163	up	1.09412	up	1.34779	up	---NA---		---NA---
CUST_70906_PI422552764	contig01183	1.19198e-05	4.92674	up	2.01354	down	1.76714	up	1.01374	down	---NA---		---NA---
CUST_70907_PI422552764	contig01183	1.21315e-05	4.33314	up	3.50501	down	1.58102	up	1.27135	down	---NA---		---NA---
CUST_70908_PI422552764	contig01183	8.5209e-06	4.88018	up	2.51831	down	1.76646	up	1.2302	down	---NA---		---NA---
CUST_41890_PI422552764	contig01184	4.20084e-08	3.54192	down	1.31498	down	1.30072	up	1.83402	up	---NA---		---NA---
CUST_41891_PI422552764	contig01184	3.77779e-07	3.55688	down	1.32104	down	1.47763	up	1.85648	up	---NA---		---NA---
CUST_41892_PI422552764	contig01184	3.82903e-08	3.61578	down	1.31829	down	1.31246	up	1.68964	up	---NA---		---NA---
CUST_73648_PI422552764	contig01189	0.000354919	2.43381	up	1.22253	down	1.26503	up	1.32295	down	---NA---		---NA---
CUST_73649_PI422552764	contig01189	0.000161246	2.61461	up	1.31202	down	1.30667	up	1.19412	down	---NA---		---NA---
CUST_73650_PI422552764	contig01189	0.00125497	2.14973	up	1.92944	down	1.07079	up	1.60046	down	---NA---		---NA---
CUST_18779_PI422552764	contig01190	4.61451e-06	2.02304	up	1.27844	down	1.11911	up	1.28805	down	---NA---		---NA---
CUST_18781_PI422552764	contig01190	8.31803e-05	2.09109	up	1.37128	down	1.12542	up	1.32724	down	---NA---		---NA---
CUST_57754_PI422552764	contig01193	8.57471e-05	5.9883	up	1.03224	up	2.57309	up	1.57406	down	---NA---		---NA---
CUST_57755_PI422552764	contig01193	0.000127806	5.8382	up	1.1605	up	2.61209	up	1.1488	down	---NA---		---NA---
CUST_57756_PI422552764	contig01193	0.000120793	6.26722	up	1.11642	down	2.88687	up	1.02487	down	---NA---		---NA---
CUST_51394_PI422552764	contig01196	0.00114958	1.38433	up	4.97616	down	1.4575	up	3.00009	down	---NA---		---NA---
CUST_51395_PI422552764	contig01196	0.00179951	2.34021	up	2.29678	down	1.33454	up	2.36559	down	---NA---		---NA---
CUST_51396_PI422552764	contig01196	0.000472246	1.6298	up	4.38387	down	1.11497	down	2.289	down	---NA---		---NA---
CUST_77821_PI422552764	contig01197	5.93845e-06	6.50673	up	3.3276	down	2.14566	up	2.54624	down	---NA---		conserved unknown protein [Ectocarpus siliculosus]	1.28068e-21
CUST_77822_PI422552764	contig01197	0.000133557	4.28834	up	1.34812	down	1.91045	up	2.12969	down	---NA---		conserved unknown protein [Ectocarpus siliculosus]	1.28068e-21
CUST_77823_PI422552764	contig01197	1.82081e-09	4.84956	up	2.16456	down	2.09854	up	1.87965	down	---NA---		conserved unknown protein [Ectocarpus siliculosus]	1.28068e-21
CUST_60169_PI422552764	contig01198	0.00406298	1.25477	down	3.11353	down	1.05653	down	1.68913	down	---NA---		---NA---
CUST_5050_PI422552764	contig01201	0.00391514	3.15223	up	1.01971	up	1.0489	up	1.03181	up	---NA---		---NA---
CUST_20235_PI422552764	contig01202	1.33696e-05	3.45584	up	1.35599	up	2.21114	up	1.04643	down	---NA---		---NA---
CUST_20236_PI422552764	contig01202	3.8809e-05	4.08059	up	1.37684	up	2.25693	up	1.40863	up	---NA---		---NA---
CUST_77215_PI422552764	contig01206	0.000103448	5.16969	down	1.06432	up	2.01802	down	1.18935	up	---NA---		---NA---
CUST_77216_PI422552764	contig01206	0.00030755	5.46936	down	1.13428	down	2.02468	down	1.08935	up	---NA---		---NA---
CUST_77217_PI422552764	contig01206	0.000860412	6.24073	down	1.52742	down	2.11968	down	1.10824	up	---NA---		---NA---
CUST_63484_PI422552764	contig01208	0.000161024	1.94832	up	1.21189	up	3.84316	up	2.52646	up	---NA---		---NA---
CUST_48474_PI422552764	contig01209	0.00352267	3.58092	up	1.31399	up	2.85002	up	1.05713	up	---NA---		---NA---
CUST_21204_PI422552764	contig01210	0.00367849	2.57692	down	1.31593	down	2.69325	down	1.2426	down	---NA---		---NA---
CUST_21205_PI422552764	contig01210	0.00059509	2.26062	up	1.61253	up	1.3144	up	1.2062	up	---NA---		---NA---
CUST_12332_PI422552764	contig01211	0.000424151	2.74149	down	2.03783	down	1.8281	up	2.259	down	---NA---		---NA---
CUST_37467_PI422552764	contig01214	0.00312021	1.14175	up	3.60897	up	1.50283	up	2.6005	up	---NA---		---NA---
CUST_77050_PI422552764	contig01217	0.00241495	2.64844	down	1.24716	down	1.00709	down	1.19391	up	---NA---		---NA---
CUST_52897_PI422552764	contig01218	6.26976e-07	31.954	up	1.19927	down	4.16957	up	1.76755	down	---NA---		---NA---
CUST_52898_PI422552764	contig01218	5.52469e-07	6.85677	up	6.38307	down	1.53211	up	8.25481	down	---NA---		---NA---
CUST_52899_PI422552764	contig01218	7.51074e-10	7.45562	up	4.16127	down	1.54334	up	3.16985	down	---NA---		---NA---
CUST_7249_PI422552764	contig01222	0.00023345	2.10124	down	1.64807	up	1.04916	down	1.21547	up	---NA---		---NA---
CUST_75865_PI422552764	contig01223	0.00018067	2.56835	down	1.27073	down	2.41393	down	1.33384	down	ssdh_rat ame: full=succinate-semialdehyde mitochondrial ame: full=nad(+)-dependent succinic semialdehyde dehydrogenase ame: full=aldehyde dehydrogenase family 5 member a1 flags: precursor	3.36846e-14	succinate-semialdehyde dehydrogenase (nad (+))	4.07756e-16
CUST_72946_PI422552764	contig01227	0.000477869	2.60077	down	2.99013	down	1.44707	down	1.09997	down	---NA---		---NA---
CUST_72947_PI422552764	contig01227	0.000356137	2.57868	down	4.11857	down	1.48837	down	1.00663	down	---NA---		---NA---
CUST_72948_PI422552764	contig01227	0.00120314	2.32205	down	5.02048	down	1.27627	down	1.06281	down	---NA---		---NA---
CUST_50935_PI422552764	contig01232	7.18452e-07	4.8041	down	2.07535	down	1.45922	down	1.66577	down	---NA---		---NA---
CUST_50936_PI422552764	contig01232	3.40477e-07	4.77547	down	2.04412	down	1.41413	down	1.67478	down	---NA---		---NA---
CUST_50937_PI422552764	contig01232	4.68831e-08	4.89442	down	2.14513	down	1.39932	down	1.63804	down	---NA---		---NA---
CUST_17831_PI422552764	contig01233	0.000511711	1.40184	up	1.85388	down	1.07757	up	2.60788	down	---NA---		---NA---
CUST_17832_PI422552764	contig01233	0.00393533	1.56652	up	1.57611	down	1.07916	up	2.15524	down	---NA---		---NA---
CUST_17833_PI422552764	contig01233	0.000593943	1.4306	up	1.77493	down	1.12595	up	2.55769	down	---NA---		---NA---
CUST_78169_PI422552764	contig01234	1.69675e-05	1.99077	up	1.69916	down	1.05113	down	2.27237	down	---NA---		---NA---
CUST_78170_PI422552764	contig01234	0.000227095	2.52286	up	3.11518	down	1.06695	up	2.38531	down	---NA---		---NA---
CUST_78171_PI422552764	contig01234	1.68321e-08	3.63154	up	3.95356	down	1.0945	up	3.82541	down	---NA---		---NA---
CUST_78064_PI422552764	contig01235	1.50376e-06	2.71057	down	2.30284	up	1.06118	down	2.42487	up	ycf36_cyapa ame: full=uncharacterized protein ycf36	4.19319e-17	conserved unknown protein [Ectocarpus siliculosus]	1.14734e-60
CUST_78065_PI422552764	contig01235	2.00684e-08	2.66367	down	2.36895	up	1.04306	down	2.29943	up	ycf36_cyapa ame: full=uncharacterized protein ycf36	4.19319e-17	conserved unknown protein [Ectocarpus siliculosus]	1.14734e-60
CUST_78066_PI422552764	contig01235	1.61236e-06	2.73522	down	1.8973	up	1.04462	down	2.308	up	ycf36_cyapa ame: full=uncharacterized protein ycf36	4.19319e-17	conserved unknown protein [Ectocarpus siliculosus]	1.14734e-60
CUST_44536_PI422552764	contig01236	0.000125503	6.99178	up	2.48304	up	5.90673	up	1.13519	down	dnak_odosi ame: full=chaperone protein dnak ame: full=heat shock protein 70 ame: full=heat shock 70 kda protein ame: full=hsp70	1.10718e-51	hsp70-type chaperone	1.58204e-67
CUST_44537_PI422552764	contig01236	0.000217367	7.34293	up	2.36837	up	6.72201	up	1.03271	down	dnak_odosi ame: full=chaperone protein dnak ame: full=heat shock protein 70 ame: full=heat shock 70 kda protein ame: full=hsp70	1.10718e-51	hsp70-type chaperone	1.58204e-67
CUST_44538_PI422552764	contig01236	0.000127517	6.40274	up	2.13431	up	5.86056	up	1.05682	down	dnak_odosi ame: full=chaperone protein dnak ame: full=heat shock protein 70 ame: full=heat shock 70 kda protein ame: full=hsp70	1.10718e-51	hsp70-type chaperone	1.58204e-67
CUST_70408_PI422552764	contig01237	0.00057586	11.7131	up	2.6015	up	9.70709	up	1.28385	down	dnak_guith ame: full=chaperone protein dnak ame: full=heat shock protein 70 ame: full=heat shock 70 kda protein ame: full=hsp70	5.78659e-144	chaperone protein	3.4797e-176
CUST_70409_PI422552764	contig01237	0.000345205	11.1626	up	2.03604	up	8.38231	up	1.41707	down	dnak_guith ame: full=chaperone protein dnak ame: full=heat shock protein 70 ame: full=heat shock 70 kda protein ame: full=hsp70	5.78659e-144	chaperone protein	3.4797e-176
CUST_70410_PI422552764	contig01237	2.87727e-05	10.598	up	1.65395	up	8.18507	up	1.2606	down	dnak_guith ame: full=chaperone protein dnak ame: full=heat shock protein 70 ame: full=heat shock 70 kda protein ame: full=hsp70	5.78659e-144	chaperone protein	3.4797e-176
CUST_69223_PI422552764	contig01243	7.89992e-06	2.04995	up	2.10362	down	1.01168	down	1.60522	down	---NA---		---NA---
CUST_69224_PI422552764	contig01243	5.87971e-05	2.08216	up	2.54526	down	1.00083	up	1.70137	down	---NA---		---NA---
CUST_69225_PI422552764	contig01243	0.000849646	1.29865	up	2.82739	down	1.3035	down	1.94609	down	---NA---		---NA---
CUST_7106_PI422552764	contig01244	1.96287e-06	7.39112	down	1.37539	up	3.18046	down	1.34251	down	---NA---		---NA---
CUST_7107_PI422552764	contig01244	2.20939e-07	9.2968	down	1.09686	up	4.05488	down	1.74056	down	---NA---		---NA---
CUST_7108_PI422552764	contig01244	3.26558e-07	10.3207	down	1.14725	up	4.49919	down	1.84093	down	---NA---		---NA---
CUST_78100_PI422552764	contig01246	1.77487e-06	10.0093	down	1.05224	down	5.37407	down	1.37075	down	---NA---		---NA---
CUST_78101_PI422552764	contig01246	5.54257e-07	15.728	down	1.05536	down	5.76057	down	1.35538	down	---NA---		---NA---
CUST_78102_PI422552764	contig01246	6.74249e-06	19.4003	down	1.06299	up	5.17975	down	1.66222	down	---NA---		---NA---
CUST_23426_PI422552764	contig01247	0.000116763	4.68068	up	1.49055	down	1.26751	up	1.69041	down	---NA---		---NA---
CUST_23427_PI422552764	contig01247	7.58909e-07	3.12329	up	2.46524	down	1.04093	down	2.13992	down	---NA---		---NA---
CUST_23428_PI422552764	contig01247	9.17268e-06	9.04462	up	1.37042	down	2.65108	up	1.25296	up	---NA---		---NA---
CUST_74989_PI422552764	contig01249	8.49936e-10	14.7629	down	2.30463	down	2.52402	down	1.32983	down	---NA---		---NA---
CUST_74990_PI422552764	contig01249	4.64833e-10	16.2342	down	2.64599	down	2.57107	down	1.3555	down	---NA---		---NA---
CUST_74991_PI422552764	contig01249	1.72632e-09	11.3232	down	2.38843	down	2.04601	down	1.09689	down	---NA---		---NA---
CUST_52204_PI422552764	contig01254	7.11736e-06	11.745	up	1.09761	down	4.20356	up	1.03307	up	---NA---		---NA---
CUST_52205_PI422552764	contig01254	4.21257e-06	10.3851	up	1.00053	down	4.07719	up	1.49898	down	---NA---		---NA---
CUST_61831_PI422552764	contig01257	8.76848e-08	2.63039	down	1.3054	up	1.59165	up	1.00855	up	---NA---		---NA---
CUST_61832_PI422552764	contig01257	2.61391e-06	2.38587	down	1.27256	up	1.34953	up	1.06073	up	---NA---		---NA---
CUST_61833_PI422552764	contig01257	3.74157e-08	2.58435	down	1.18136	up	1.51356	up	1.00789	down	---NA---		---NA---
CUST_18782_PI422552764	contig01258	1.15543e-07	1.6861	down	3.59937	up	1.09884	down	1.7271	up	---NA---		---NA---
CUST_18783_PI422552764	contig01258	1.32909e-06	1.45533	down	4.3262	up	1.00595	up	2.09588	up	---NA---		---NA---
CUST_18784_PI422552764	contig01258	2.14194e-08	1.78271	down	3.73009	up	1.0668	down	1.80453	up	---NA---		---NA---
CUST_78521_PI422552764	contig01259	3.0818e-07	2.22632	down	2.29954	up	1.33536	down	2.93289	up	---NA---		---NA---
CUST_78522_PI422552764	contig01259	4.80017e-08	2.21052	down	2.33707	up	1.33879	down	3.00223	up	---NA---		---NA---
CUST_77923_PI422552764	contig01262	0.0026358	1.63289	up	7.44069	up	2.5413	up	6.50249	up	---NA---		protein	2.6991e-75
CUST_77924_PI422552764	contig01262	1.57606e-11	5.88794	down	3.7875	up	1.27239	up	3.20016	up	---NA---		protein	2.6991e-75
CUST_77925_PI422552764	contig01262	1.68974e-10	6.75728	down	4.4784	up	1.08296	down	3.52882	up	---NA---		protein	2.6991e-75
CUST_75958_PI422552764	contig01263	0.00053766	4.18314	up	2.70855	up	1.57479	up	1.01639	up	spt41_mouse ame: full=transcription elongation factor spt4 1 ame: full=drb sensitivity-inducing factor small subunit 1 short=dsif small subunit 1	8.93675e-23	suppressor of ty 4 homolog 1 ( cerevisiae)	6.9508e-56
CUST_75960_PI422552764	contig01263	0.00262956	3.96771	up	1.87395	up	1.83435	up	1.95917	up	spt41_mouse ame: full=transcription elongation factor spt4 1 ame: full=drb sensitivity-inducing factor small subunit 1 short=dsif small subunit 1	8.93675e-23	suppressor of ty 4 homolog 1 ( cerevisiae)	6.9508e-56
CUST_11616_PI422552764	contig01265	0.00413584	1.56863	down	2.4858	up	1.41808	up	1.66818	up	---NA---		---NA---
CUST_72616_PI422552764	contig01270	7.84171e-05	1.2378	up	2.22048	up	1.01997	up	1.254	up	---NA---		protein	5.65768e-73
CUST_72618_PI422552764	contig01270	0.000110198	1.55201	down	2.21096	up	1.11002	down	1.60083	up	---NA---		protein	5.65768e-73
CUST_30342_PI422552764	contig01274	0.00104602	1.93709	up	2.06048	up	1.13072	down	1.23588	up	---NA---		conserved unknown protein [Ectocarpus siliculosus]	4.14948e-64
CUST_4125_PI422552764	contig01275	7.79351e-05	2.01241	up	4.85762	up	1.06729	up	5.22463	up	---NA---		---NA---
CUST_4126_PI422552764	contig01275	3.32487e-06	2.01377	up	4.98368	up	1.1017	up	5.32212	up	---NA---		---NA---
CUST_4127_PI422552764	contig01275	0.000572599	1.35227	up	3.50188	up	1.20793	down	2.88964	up	---NA---		---NA---
CUST_74998_PI422552764	contig01276	1.42649e-07	1.89437	up	3.7743	up	1.34377	up	1.76627	up	---NA---		conserved unknown protein [Ectocarpus siliculosus]	1.51402e-38
CUST_74999_PI422552764	contig01276	9.06872e-09	3.10433	up	3.92096	up	1.18021	up	1.37123	up	---NA---		conserved unknown protein [Ectocarpus siliculosus]	1.51402e-38
CUST_75000_PI422552764	contig01276	4.50703e-08	3.04972	up	3.14659	up	1.32742	up	1.23729	up	---NA---		conserved unknown protein [Ectocarpus siliculosus]	1.51402e-38
CUST_49965_PI422552764	contig01280	1.78204e-05	2.68095	up	1.00948	down	1.27364	up	1.1519	up	---NA---		---NA---
CUST_78060_PI422552764	contig01281	1.4867e-06	2.93123	up	1.08224	down	1.35426	up	1.09263	down	---NA---		conserved unknown protein [Ectocarpus siliculosus]	2.71615e-18
CUST_18369_PI422552764	contig01282	0.000448793	1.32718	down	2.08351	up	1.28116	down	1.46172	up	---NA---		---NA---
CUST_16989_PI422552764	contig01283	0.000346797	3.18817	up	1.08246	up	2.79888	up	1.19184	up	---NA---		---NA---
CUST_13241_PI422552764	contig01290	0.000448063	3.02384	down	1.61924	down	1.41907	down	1.12249	up	---NA---		---NA---
CUST_13242_PI422552764	contig01290	0.000181939	3.14688	down	1.71304	down	1.47985	down	1.1032	up	---NA---		---NA---
CUST_13243_PI422552764	contig01290	0.000627417	3.29012	down	1.8476	down	1.6276	down	1.04278	down	---NA---		---NA---
CUST_18785_PI422552764	contig01294	8.92586e-05	4.86121	up	1.55041	down	2.027	up	1.83874	down	---NA---		---NA---
CUST_18786_PI422552764	contig01294	1.2547e-07	3.34638	up	1.72742	down	1.74179	up	1.68415	down	---NA---		---NA---
CUST_18787_PI422552764	contig01294	7.69258e-07	3.61521	up	2.49434	down	1.67006	up	2.15547	down	---NA---		---NA---
CUST_14186_PI422552764	contig01306	0.00150714	2.78119	up	3.13886	up	3.17035	up	5.32339	up	---NA---		---NA---
CUST_14187_PI422552764	contig01306	1.47016e-05	4.04122	up	5.95978	up	4.06098	up	7.15202	up	---NA---		---NA---
CUST_14188_PI422552764	contig01306	6.80298e-06	4.66934	up	6.77193	up	4.32214	up	8.46352	up	---NA---		---NA---
CUST_9177_PI422552764	contig01309	0.000919406	2.4075	up	1.88956	down	1.51987	up	1.87978	down	---NA---		---NA---
CUST_9178_PI422552764	contig01309	0.00164292	3.77283	up	1.18435	down	2.26281	up	1.02068	down	---NA---		---NA---
CUST_40589_PI422552764	contig01313	2.69498e-06	1.57272	up	2.01984	down	1.0519	up	1.62205	down	---NA---		---NA---
CUST_56035_PI422552764	contig01317	5.31579e-06	5.72563	up	1.91151	down	1.62285	up	2.07229	down	---NA---		---NA---
CUST_56036_PI422552764	contig01317	4.65976e-06	5.85588	up	1.587	down	1.89907	up	1.24611	down	---NA---		---NA---
CUST_56037_PI422552764	contig01317	4.83447e-05	7.72612	up	1.68218	down	1.54688	up	1.35524	down	---NA---		---NA---
CUST_7649_PI422552764	contig01320	3.73442e-05	2.03939	up	2.14967	down	1.30094	up	1.67558	down	---NA---		---NA---
CUST_7650_PI422552764	contig01320	3.24436e-05	2.11132	up	2.09856	down	1.33629	up	1.68116	down	---NA---		---NA---
CUST_7651_PI422552764	contig01320	3.77358e-05	2.14539	up	2.09568	down	1.34058	up	1.67877	down	---NA---		---NA---
CUST_56077_PI422552764	contig01322	9.53246e-06	2.31959	down	1.10977	up	1.21614	down	1.58445	up	---NA---		---NA---
CUST_56078_PI422552764	contig01322	2.53038e-05	2.27466	down	1.10782	up	1.2143	down	1.55249	up	---NA---		---NA---
CUST_56079_PI422552764	contig01322	2.33941e-06	2.30944	down	1.19179	up	1.18537	down	1.62418	up	---NA---		---NA---
CUST_72923_PI422552764	contig01323	8.49051e-08	2.18231	up	1.76365	down	1.35331	up	1.79161	down	---NA---		---NA---
CUST_72924_PI422552764	contig01323	1.77377e-06	2.02127	up	1.95206	down	1.24792	up	1.87612	down	---NA---		---NA---
CUST_47692_PI422552764	contig01324	1.95408e-05	7.45733	up	1.27457	up	2.57909	up	1.62706	down	---NA---		---NA---
CUST_47693_PI422552764	contig01324	5.35433e-07	10.5316	up	2.33629	down	3.0002	up	2.78139	down	---NA---		---NA---
CUST_47694_PI422552764	contig01324	1.4978e-06	12.9984	up	1.718	down	4.61138	up	1.51199	down	---NA---		---NA---
CUST_46342_PI422552764	contig01326	6.61523e-07	5.05606	down	1.60032	up	1.05032	down	1.71706	up	---NA---		---NA---
CUST_46343_PI422552764	contig01326	4.65136e-07	5.18443	down	1.59217	up	1.02875	down	1.778	up	---NA---		---NA---
CUST_46344_PI422552764	contig01326	4.24425e-07	4.75345	down	1.65524	up	1.01929	up	1.83484	up	---NA---		---NA---
CUST_50938_PI422552764	contig01329	2.08804e-06	4.85961	down	1.10655	down	2.55758	down	1.16912	down	---NA---		---NA---
CUST_50939_PI422552764	contig01329	1.62218e-06	4.00484	down	1.13514	down	2.43435	down	1.03382	up	---NA---		---NA---
CUST_50940_PI422552764	contig01329	7.16742e-05	3.77955	down	1.17995	down	2.72276	down	1.24775	down	---NA---		---NA---
CUST_68224_PI422552764	contig01330	2.88356e-06	3.36783	down	1.06431	up	1.33764	down	1.05133	up	---NA---		---NA---
CUST_68225_PI422552764	contig01330	0.000513452	2.53198	down	1.24052	up	1.05152	down	1.2422	up	---NA---		---NA---
CUST_68226_PI422552764	contig01330	4.29157e-09	3.2289	down	1.68154	up	1.28557	down	1.5203	up	---NA---		---NA---
CUST_5802_PI422552764	contig01331	0.00427654	2.37586	up	1.35318	up	1.45473	up	1.08966	down	---NA---		---NA---
CUST_22631_PI422552764	contig01332	0.0027438	2.76931	up	1.40855	up	1.71496	up	1.17483	up	---NA---		---NA---
CUST_73375_PI422552764	contig01334	0.00186253	1.62216	up	3.72705	up	1.27856	up	2.92334	up	---NA---		---NA---
CUST_69073_PI422552764	contig01336	0.000802764	2.50903	down	1.20697	up	1.67359	down	1.21737	down	---NA---		---NA---
CUST_13244_PI422552764	contig01337	0.000990489	2.12343	up	1.51646	up	1.43365	up	1.60354	up	---NA---		---NA---
CUST_12764_PI422552764	contig01338	1.62371e-07	7.56559	up	1.42039	down	1.87637	up	1.27378	down	---NA---		---NA---
CUST_12765_PI422552764	contig01338	2.42098e-08	6.31735	up	1.25181	down	1.92061	up	1.24373	down	---NA---		---NA---
CUST_12766_PI422552764	contig01338	2.38376e-06	3.80342	up	1.11149	down	1.39247	up	1.07974	down	---NA---		---NA---
CUST_13421_PI422552764	contig01339	6.63491e-08	12.7301	up	1.45203	up	5.14912	up	1.0272	down	---NA---		---NA---
CUST_13422_PI422552764	contig01339	1.95674e-06	12.254	up	1.0155	up	5.13705	up	1.19459	down	---NA---		---NA---
CUST_13423_PI422552764	contig01339	1.74763e-06	10.7508	up	1.16784	up	4.7373	up	1.29617	up	---NA---		---NA---
CUST_23837_PI422552764	contig01343	0.000142221	1.22061	up	5.58383	down	1.05848	up	9.69591	down	---NA---		---NA---
CUST_23838_PI422552764	contig01343	2.74984e-05	1.65508	up	5.99418	down	1.21202	up	10.1831	down	---NA---		---NA---
CUST_23839_PI422552764	contig01343	3.80121e-06	1.13082	up	6.15321	down	1.00066	up	15.8017	down	---NA---		---NA---
CUST_3603_PI422552764	contig01344	0.00289482	1.25056	up	1.64837	down	1.37806	down	5.68618	down	---NA---		---NA---
CUST_2124_PI422552764	contig01345	0.00295766	1.12885	up	2.97912	down	1.3152	down	4.88427	down	---NA---		---NA---
CUST_2126_PI422552764	contig01345	1.58306e-05	2.63302	up	1.62306	down	1.45839	up	5.01483	down	---NA---		---NA---
CUST_52471_PI422552764	contig01352	3.55548e-05	2.16518	up	1.09717	down	2.46724	up	1.26547	up	---NA---		---NA---
CUST_2847_PI422552764	contig01353	0.00311514	2.02787	up	1.24437	down	1.60766	up	1.32432	up	---NA---		---NA---
CUST_8163_PI422552764	contig01354	0.00234288	2.3595	up	1.8202	up	1.12199	up	1.22557	up	---NA---		---NA---
CUST_46804_PI422552764	contig01356	0.000210238	2.12515	up	1.34014	down	1.10132	down	1.23005	down	---NA---		---NA---
CUST_46805_PI422552764	contig01356	7.43316e-06	2.60103	up	1.14345	up	1.03065	down	1.05521	down	---NA---		---NA---
CUST_46806_PI422552764	contig01356	1.1923e-06	3.30796	up	1.02733	down	1.08547	up	1.00758	down	---NA---		---NA---
CUST_76131_PI422552764	contig01357	0.00179632	3.61987	up	1.60656	up	3.303	up	2.99061	up	---NA---		---NA---
CUST_142_PI422552764	contig01360	2.0231e-06	1.3115	up	9.27928	up	1.08525	up	6.63009	up	---NA---		---NA---
CUST_143_PI422552764	contig01360	9.07473e-08	1.44304	up	11.9467	up	1.20291	down	8.29067	up	---NA---		---NA---
CUST_144_PI422552764	contig01360	5.16504e-05	1.09777	down	7.62275	up	1.33589	down	5.06207	up	---NA---		---NA---
CUST_45793_PI422552764	contig01361	5.10446e-05	4.82505	up	8.45478	down	1.98632	up	1.34064	down	---NA---		---NA---
CUST_26180_PI422552764	contig01362	2.21431e-05	1.21044	up	9.28786	up	1.2168	down	6.45266	up	l181_chleu ame: full=chlorophyll a-b binding protein chloroplastic flags: precursor	4.10714e-08	light harvesting complex protein	1.29607e-34
CUST_26181_PI422552764	contig01362	2.53733e-05	1.29406	up	11.8974	up	1.14405	down	7.15986	up	l181_chleu ame: full=chlorophyll a-b binding protein chloroplastic flags: precursor	4.10714e-08	light harvesting complex protein	1.29607e-34
CUST_26182_PI422552764	contig01362	2.13639e-05	1.23208	up	11.4722	up	1.18115	down	7.17104	up	l181_chleu ame: full=chlorophyll a-b binding protein chloroplastic flags: precursor	4.10714e-08	light harvesting complex protein	1.29607e-34
CUST_65095_PI422552764	contig01363	8.32075e-08	2.15573	up	16.2121	up	1.75916	up	9.33997	up	---NA---		---NA---
CUST_65096_PI422552764	contig01363	1.07836e-07	1.93907	up	13.7011	up	1.73359	up	8.88722	up	---NA---		---NA---
CUST_65097_PI422552764	contig01363	7.6697e-07	2.21673	up	13.8652	up	1.66753	up	8.23493	up	---NA---		---NA---
CUST_72283_PI422552764	contig01364	3.94383e-06	3.23648	down	1.25264	down	1.81232	down	1.05117	down	---NA---		---NA---
CUST_72284_PI422552764	contig01364	1.11424e-06	2.65297	down	1.40812	down	1.61251	down	1.00515	down	---NA---		---NA---
CUST_72285_PI422552764	contig01364	4.90743e-07	2.76015	down	1.43915	down	1.96154	down	1.08131	down	---NA---		---NA---
CUST_66593_PI422552764	contig01366	0.00366192	2.75524	up	2.20368	up	1.8867	up	2.89431	up	rh5_orysj ame: full=dead-box atp-dependent rna helicase 5	1.96476e-62	dead deah box rna	1.9719e-99
CUST_50863_PI422552764	contig01370	0.000307902	6.98165	down	2.13731	down	1.86529	down	1.63744	down	---NA---		---NA---
CUST_50864_PI422552764	contig01370	0.00026977	7.23587	down	1.77191	down	1.8208	down	1.44734	down	---NA---		---NA---
CUST_50865_PI422552764	contig01370	0.000599401	8.23406	down	2.12757	down	1.98477	down	1.68189	down	---NA---		---NA---
CUST_72748_PI422552764	contig01371	0.0019758	3.05467	down	1.71946	down	1.07253	down	1.27638	down	---NA---		---NA---
CUST_72750_PI422552764	contig01371	0.000596549	3.4046	down	1.8939	down	1.20187	down	1.4802	down	---NA---		---NA---
CUST_1639_PI422552764	contig01374	0.000800098	1.23747	up	2.33883	up	1.23414	down	1.10759	down	---NA---		---NA---
CUST_55162_PI422552764	contig01376	1.11865e-06	7.50338	down	3.32032	down	1.84569	down	2.19899	down	---NA---		---NA---
CUST_55163_PI422552764	contig01376	4.58471e-05	5.28943	down	3.35015	down	1.74771	down	2.25027	down	---NA---		---NA---
CUST_55164_PI422552764	contig01376	2.29127e-06	6.2927	down	2.71764	down	1.80659	down	2.0837	down	---NA---		---NA---
CUST_62635_PI422552764	contig01382	0.000580317	1.75652	up	2.09142	down	1.88951	up	1.04377	down	---NA---		zinc metalloendopeptidase	1.18144e-52
CUST_62636_PI422552764	contig01382	0.000203284	1.7843	up	2.17662	down	2.01224	up	1.05307	down	---NA---		zinc metalloendopeptidase	1.18144e-52
CUST_62637_PI422552764	contig01382	0.000628467	1.92416	up	2.00531	down	2.09825	up	1.03902	up	---NA---		zinc metalloendopeptidase	1.18144e-52
CUST_60751_PI422552764	contig01384	5.39717e-07	2.28783	up	2.75366	down	2.5474	up	1.27212	down	---NA---		---NA---
CUST_60752_PI422552764	contig01384	4.90536e-07	2.0763	up	2.51513	down	2.26881	up	1.31248	down	---NA---		---NA---
CUST_60753_PI422552764	contig01384	6.86376e-06	1.31089	up	1.47873	down	2.22284	up	1.18749	down	---NA---		---NA---
CUST_73987_PI422552764	contig01385	1.52831e-05	1.53343	up	2.19017	up	1.2431	up	1.99026	up	---NA---		---NA---
CUST_73988_PI422552764	contig01385	8.67508e-06	1.60399	up	2.18404	up	1.21221	up	2.05308	up	---NA---		---NA---
CUST_59266_PI422552764	contig01386	2.5264e-06	2.71295	up	3.40899	down	4.04084	up	1.0943	down	---NA---		---NA---
CUST_59267_PI422552764	contig01386	7.07839e-06	3.04239	up	3.7122	down	4.1795	up	1.09649	down	---NA---		---NA---
CUST_59268_PI422552764	contig01386	1.13349e-05	2.75931	up	4.43556	down	3.95801	up	1.07494	down	---NA---		---NA---
CUST_76057_PI422552764	contig01388	0.000207902	2.40121	down	1.04198	up	1.2675	up	1.19827	up	---NA---		zinc metalloendopeptidase	2.21333e-41
CUST_76058_PI422552764	contig01388	0.00147737	2.16291	down	1.02511	up	1.19405	up	1.15409	up	---NA---		zinc metalloendopeptidase	2.21333e-41
CUST_75370_PI422552764	contig01390	9.12084e-08	6.10932	down	1.06377	down	1.2098	up	1.55627	up	---NA---		---NA---
CUST_75371_PI422552764	contig01390	9.59558e-08	4.26788	down	1.00385	down	1.21934	up	1.34499	up	---NA---		---NA---
CUST_75372_PI422552764	contig01390	1.79358e-07	5.76353	down	1.00893	up	1.42793	up	1.6306	up	---NA---		---NA---
CUST_39059_PI422552764	contig01392	0.00380829	1.28561	up	2.67555	down	1.07654	down	1.97099	down	---NA---		---NA---
CUST_46579_PI422552764	contig01394	6.28697e-06	2.90179	down	1.07351	up	1.52021	down	1.30831	up	---NA---		---NA---
CUST_46580_PI422552764	contig01394	2.17195e-06	3.448	down	1.07778	up	1.53104	down	1.40023	up	---NA---		---NA---
CUST_46581_PI422552764	contig01394	2.4657e-07	4.37015	down	1.14214	up	1.68476	down	1.48916	up	---NA---		---NA---
CUST_72857_PI422552764	contig01398	0.000726905	3.68611	up	1.19939	down	1.53101	up	1.74216	up	---NA---		---NA---
CUST_3252_PI422552764	contig01408	4.7459e-05	10.4646	down	1.20929	up	3.48234	down	1.61145	down	---NA---		---NA---
CUST_3253_PI422552764	contig01408	1.50789e-06	17.7664	down	1.12417	down	5.30645	down	2.52578	down	---NA---		---NA---
CUST_3254_PI422552764	contig01408	1.49673e-06	11.8716	down	1.49026	up	2.66821	down	1.22694	down	---NA---		---NA---
CUST_76165_PI422552764	contig01409	0.000179255	5.1984	down	1.35646	up	1.13273	up	2.2788	up	s38a6_xentr ame: full=probable sodium-coupled neutral amino acid transporter 6 ame: full=na(+)-coupled neutral amino acid transporter 6 ame: full=solute carrier family 38 member 6	5.24333e-18	protein	2.1783e-169
CUST_76166_PI422552764	contig01409	1.39062e-07	9.28921	down	1.58841	up	1.12879	up	2.65324	up	s38a6_xentr ame: full=probable sodium-coupled neutral amino acid transporter 6 ame: full=na(+)-coupled neutral amino acid transporter 6 ame: full=solute carrier family 38 member 6	5.24333e-18	protein	2.1783e-169
CUST_76167_PI422552764	contig01409	2.32297e-07	10.1135	down	1.55995	up	1.09061	up	2.68622	up	s38a6_xentr ame: full=probable sodium-coupled neutral amino acid transporter 6 ame: full=na(+)-coupled neutral amino acid transporter 6 ame: full=solute carrier family 38 member 6	5.24333e-18	protein	2.1783e-169
CUST_63511_PI422552764	contig01414	0.00208562	4.35752	down	1.07928	up	1.77425	down	1.3498	up	---NA---		---NA---
CUST_63512_PI422552764	contig01414	0.000239181	3.30686	down	2.53685	down	1.04208	down	1.04155	up	---NA---		---NA---
CUST_63513_PI422552764	contig01414	0.000510324	3.7874	down	2.57124	down	1.14118	down	1.05003	down	---NA---		---NA---
CUST_70867_PI422552764	contig01416	6.70804e-11	52.2365	down	2.1655	up	2.08733	down	1.69938	up	---NA---		---NA---
CUST_70868_PI422552764	contig01416	3.12078e-11	35.3704	down	1.98302	up	2.04597	down	1.80279	up	---NA---		---NA---
CUST_70869_PI422552764	contig01416	4.97966e-11	45.15	down	1.95754	up	2.13759	down	1.65016	up	---NA---		---NA---
CUST_68878_PI422552764	contig01419	4.74967e-06	4.44425	up	2.98713	up	1.20165	up	1.92962	up	---NA---		---NA---
CUST_68879_PI422552764	contig01419	2.98504e-06	3.08862	up	4.27828	up	1.37051	up	2.02854	up	---NA---		---NA---
CUST_68880_PI422552764	contig01419	1.3705e-05	7.45895	up	4.52692	up	1.65773	up	2.35076	up	---NA---		---NA---
CUST_70825_PI422552764	contig01421	0.0040901	2.21779	up	1.04647	down	1.3216	down	1.04575	down	---NA---		---NA---
CUST_70827_PI422552764	contig01421	4.55261e-06	6.12592	up	2.79514	up	6.09874	up	1.50123	up	---NA---		---NA---
CUST_74950_PI422552764	contig01422	1.91357e-06	1.29217	down	2.34212	up	1.10474	up	1.55387	up	syno_arath ame: full=asparaginyl-trna chloroplastic mitochondrial ame: full=asparagine--trna ligase short= flags: precursor	4.04994e-120	asparaginyl-trna synthetase	3.4464e-168
CUST_74951_PI422552764	contig01422	5.94636e-06	1.455	down	2.41178	up	1.13581	up	1.67819	up	syno_arath ame: full=asparaginyl-trna chloroplastic mitochondrial ame: full=asparagine--trna ligase short= flags: precursor	4.04994e-120	asparaginyl-trna synthetase	3.4464e-168
CUST_74952_PI422552764	contig01422	1.82428e-05	1.65354	down	2.21039	up	1.06623	up	1.63185	up	syno_arath ame: full=asparaginyl-trna chloroplastic mitochondrial ame: full=asparagine--trna ligase short= flags: precursor	4.04994e-120	asparaginyl-trna synthetase	3.4464e-168
CUST_753_PI422552764	contig01425	0.000447299	1.18259	down	2.37554	down	1.48523	up	1.37412	down	---NA---		---NA---
CUST_65418_PI422552764	contig01428	0.000240677	2.40312	down	1.10083	up	1.58759	down	1.08165	down	---NA---		exodeoxyribonuclease gamma subunit	2.78235e-08
CUST_77476_PI422552764	contig01431	9.534e-06	1.19425	down	1.38909	down	4.102	up	3.12927	up	---NA---		---NA---
CUST_77477_PI422552764	contig01431	7.76108e-06	1.35595	down	1.40747	down	3.83218	up	3.2644	up	---NA---		---NA---
CUST_77478_PI422552764	contig01431	6.31943e-06	2.06615	down	1.28181	down	2.98121	up	3.66752	up	---NA---		---NA---
CUST_78413_PI422552764	contig01434	4.60085e-07	1.62108	down	2.47908	up	1.53931	down	2.36525	up	---NA---		---NA---
CUST_78414_PI422552764	contig01434	2.13514e-06	1.49749	down	2.1167	up	1.46818	down	2.64313	up	---NA---		---NA---
CUST_58760_PI422552764	contig01435	0.00407451	1.65716	down	1.71231	down	1.07163	down	2.39259	down	---NA---		---NA---
CUST_58761_PI422552764	contig01435	0.000521696	2.12638	down	2.04119	down	1.16596	down	2.50552	down	---NA---		---NA---
CUST_47413_PI422552764	contig01438	2.6636e-05	2.52743	up	1.4332	up	1.65022	up	1.0481	down	---NA---		---NA---
CUST_47414_PI422552764	contig01438	0.00348745	2.26601	up	1.36999	up	1.69023	up	1.12409	down	---NA---		---NA---
CUST_68245_PI422552764	contig01441	0.000672484	3.64771	up	1.09795	up	1.67427	up	1.06135	down	---NA---		---NA---
CUST_68246_PI422552764	contig01441	0.000269366	3.3161	up	1.19121	up	1.61017	up	1.22566	down	---NA---		---NA---
CUST_61021_PI422552764	contig01442	4.43325e-05	2.55971	down	1.03363	down	2.34577	down	1.00934	down	ca123_mouse ame: full=upf0587 protein c1orf123 homolog	8.50074e-15	protein	9.56764e-78
CUST_61022_PI422552764	contig01442	3.70554e-05	2.66305	down	1.03105	down	2.24964	down	1.00753	down	ca123_mouse ame: full=upf0587 protein c1orf123 homolog	8.50074e-15	protein	9.56764e-78
CUST_61023_PI422552764	contig01442	4.64346e-05	2.82917	down	1.12452	down	2.3369	down	1.03092	down	ca123_mouse ame: full=upf0587 protein c1orf123 homolog	8.50074e-15	protein	9.56764e-78
CUST_78244_PI422552764	contig01445	0.00362806	2.22783	up	2.04756	up	1.47761	up	1.12434	up	---NA---		---NA---
CUST_78246_PI422552764	contig01445	0.000251384	3.27474	up	1.59778	up	1.9146	up	1.41475	up	---NA---		---NA---
CUST_55682_PI422552764	contig01446	0.00194933	2.22166	down	1.21558	down	1.13596	up	1.26089	up	---NA---		---NA---
CUST_68795_PI422552764	contig01450	3.32408e-05	2.2072	down	1.68014	up	1.40358	down	1.86824	up	---NA---		---NA---
CUST_68796_PI422552764	contig01450	0.00289645	2.19103	down	1.55135	up	1.35212	down	1.50012	up	---NA---		---NA---
CUST_60660_PI422552764	contig01453	0.00361834	3.24884	down	1.04909	up	3.28693	down	1.4552	down	---NA---		---NA---
CUST_66041_PI422552764	contig01454	0.00098377	3.45709	up	1.25938	up	1.84716	up	1.00672	up	---NA---		predicted protein [Nematostella vectensis]	1.09421e-07
CUST_66042_PI422552764	contig01454	0.000726905	3.4098	up	1.1717	down	1.73497	up	1.01508	down	---NA---		predicted protein [Nematostella vectensis]	1.09421e-07
CUST_66438_PI422552764	contig01457	0.0013698	4.74966	down	1.66526	down	2.16858	down	2.38357	down	---NA---		---NA---
CUST_52315_PI422552764	contig01458	4.4168e-07	9.74944	down	1.03697	down	3.51898	down	1.74831	up	---NA---		---NA---
CUST_52316_PI422552764	contig01458	1.73364e-06	22.1368	down	1.44218	down	4.23419	down	1.59168	up	---NA---		---NA---
CUST_52317_PI422552764	contig01458	2.93934e-06	13.7752	down	1.15649	down	3.24573	down	1.67533	up	---NA---		---NA---
CUST_71530_PI422552764	contig01462	1.38601e-11	30.7015	down	5.81004	up	4.67097	down	3.63766	up	---NA---		conserved unknown protein [Ectocarpus siliculosus]	6.97718e-14
CUST_71531_PI422552764	contig01462	8.90601e-12	28.8909	down	5.38022	up	4.79487	down	3.3074	up	---NA---		conserved unknown protein [Ectocarpus siliculosus]	6.97718e-14
CUST_71532_PI422552764	contig01462	1.34027e-11	30.5236	down	5.37327	up	6.2713	down	3.41373	up	---NA---		conserved unknown protein [Ectocarpus siliculosus]	6.97718e-14
CUST_72820_PI422552764	contig01463	0.000356676	2.78166	up	2.50347	down	1.91973	down	2.7859	down	---NA---		---NA---
CUST_72822_PI422552764	contig01463	0.00227222	4.20491	up	1.5813	down	2.15512	up	1.21124	down	---NA---		---NA---
CUST_67579_PI422552764	contig01469	0.000398439	2.02224	up	1.37283	up	1.42212	up	1.27829	up	rbm25_mouse ame: full=rna-binding protein 25 ame: full=rna-binding motif protein 25	1.46906e-15	rna-binding protein 25-like	9.86618e-34
CUST_78292_PI422552764	contig01471	8.32918e-07	18.5625	down	1.29362	up	1.89943	down	1.25804	up	atpb_pylli ame: full=atp synthase subunit chloroplastic ame: full=f-atpase subunit beta ame: full=atp synthase f1 sector subunit beta	0	atp synthase cf1 beta chain	0
CUST_78293_PI422552764	contig01471	5.33245e-07	22.2206	down	1.12724	up	2.2343	down	1.06507	up	atpb_pylli ame: full=atp synthase subunit chloroplastic ame: full=f-atpase subunit beta ame: full=atp synthase f1 sector subunit beta	0	atp synthase cf1 beta chain	0
CUST_78294_PI422552764	contig01471	1.10575e-06	20.3137	down	1.24794	up	1.77592	down	1.29206	up	atpb_pylli ame: full=atp synthase subunit chloroplastic ame: full=f-atpase subunit beta ame: full=atp synthase f1 sector subunit beta	0	atp synthase cf1 beta chain	0
CUST_68410_PI422552764	contig01473	0.000807252	2.34456	up	1.11527	down	1.18577	up	1.10806	down	---NA---		---NA---
CUST_68411_PI422552764	contig01473	0.000191323	2.27768	up	1.29255	down	1.15352	up	1.24215	down	---NA---		---NA---
CUST_68412_PI422552764	contig01473	0.000338293	2.22602	up	1.40493	down	1.05566	up	1.37987	down	---NA---		---NA---
CUST_59441_PI422552764	contig01476	6.88078e-06	2.64829	up	1.29238	up	2.62132	up	1.09376	down	---NA---		---NA---
CUST_59442_PI422552764	contig01476	0.000257343	4.42049	up	2.52867	up	3.01382	up	1.11988	up	---NA---		---NA---
CUST_145_PI422552764	contig01478	0.000386656	8.39705	up	2.3678	up	5.01257	up	1.98792	up	---NA---		---NA---
CUST_146_PI422552764	contig01478	0.000671976	7.19089	up	1.62324	up	3.87654	up	1.93267	up	---NA---		---NA---
CUST_65704_PI422552764	contig01479	0.00132904	7.69721	up	1.74784	up	2.22866	up	1.14871	up	---NA---		---NA---
CUST_65705_PI422552764	contig01479	2.92564e-05	5.25943	up	2.13075	up	1.53749	up	1.10753	down	---NA---		---NA---
CUST_64414_PI422552764	contig01482	1.41984e-06	3.1499	down	1.34132	down	1.20341	down	1.27886	down	---NA---		---NA---
CUST_64415_PI422552764	contig01482	1.14005e-07	3.13017	down	1.16901	down	1.24348	down	1.12299	down	---NA---		---NA---
CUST_64416_PI422552764	contig01482	1.94275e-08	3.32333	down	1.04313	down	1.37431	down	1.01221	down	---NA---		---NA---
CUST_35353_PI422552764	contig01484	0.000486066	2.27585	up	2.01691	up	1.24247	up	1.19243	up	---NA---		---NA---
CUST_35354_PI422552764	contig01484	4.86106e-06	3.21395	up	2.02134	up	1.20219	up	1.21061	up	---NA---		---NA---
CUST_35355_PI422552764	contig01484	0.000315571	2.01144	up	1.99643	up	1.22051	up	1.18246	up	---NA---		---NA---
CUST_52024_PI422552764	contig01486	4.84815e-07	2.28783	up	1.43095	down	2.00307	up	1.801	down	---NA---		---NA---
CUST_52025_PI422552764	contig01486	4.15698e-07	2.00137	up	1.54968	down	1.74527	up	2.08527	down	---NA---		---NA---
CUST_52026_PI422552764	contig01486	5.16006e-07	2.26704	up	1.36	down	2.01905	up	1.77733	down	---NA---		---NA---
CUST_74429_PI422552764	contig01487	0.00160963	1.1535	down	1.14436	down	2.11443	up	1.78696	up	---NA---		---NA---
CUST_77177_PI422552764	contig01488	2.23552e-05	2.14141	up	1.10019	up	1.03669	down	1.34493	up	---NA---		conserved unknown protein [Ectocarpus siliculosus]	1.58203e-12
CUST_16472_PI422552764	contig01489	2.48769e-05	2.74122	up	1.01998	up	1.28126	up	1.13054	up	tpmt_shehh ame: full=thiopurine s-methyltransferase ame: full=thiopurine methyltransferase	5.9062e-07	conserved unknown protein [Ectocarpus siliculosus]	3.8992e-33
CUST_16473_PI422552764	contig01489	3.7934e-05	2.93972	up	1.4578	up	1.51205	up	1.26057	up	tpmt_shehh ame: full=thiopurine s-methyltransferase ame: full=thiopurine methyltransferase	5.9062e-07	conserved unknown protein [Ectocarpus siliculosus]	3.8992e-33
CUST_16474_PI422552764	contig01489	2.74719e-07	2.73052	up	1.196	down	1.05742	up	1.08386	down	tpmt_shehh ame: full=thiopurine s-methyltransferase ame: full=thiopurine methyltransferase	5.9062e-07	conserved unknown protein [Ectocarpus siliculosus]	3.8992e-33
CUST_45586_PI422552764	contig01491	8.90963e-05	10.6328	up	3.04541	up	4.23147	up	2.5177	up	---NA---		---NA---
CUST_45587_PI422552764	contig01491	0.000858516	4.75419	up	1.48022	up	2.66546	up	1.2417	down	---NA---		---NA---
CUST_45588_PI422552764	contig01491	0.00087706	4.78333	up	1.70453	up	2.33005	up	1.66324	up	---NA---		---NA---
CUST_34789_PI422552764	contig01492	4.06104e-07	6.20537	down	1.89825	up	2.45262	down	1.47135	up	---NA---		conserved unknown protein [Ectocarpus siliculosus]	1.54705e-18
CUST_34790_PI422552764	contig01492	3.2998e-07	5.97675	down	2.0304	up	2.44234	down	1.49346	up	---NA---		conserved unknown protein [Ectocarpus siliculosus]	1.54705e-18
CUST_34791_PI422552764	contig01492	6.95017e-07	5.91757	down	1.93117	up	2.38605	down	1.50389	up	---NA---		conserved unknown protein [Ectocarpus siliculosus]	1.54705e-18
CUST_17678_PI422552764	contig01493	1.44231e-05	5.39173	up	1.47176	up	5.07401	up	2.07209	up	---NA---		---NA---
CUST_17680_PI422552764	contig01493	0.00046199	3.37133	up	1.04902	down	2.88591	up	1.50235	up	---NA---		---NA---
CUST_51070_PI422552764	contig01495	0.000435661	1.4653	up	4.13714	up	1.24477	up	1.80803	up	---NA---		uncharacterized protein conserved in bacteria with a cystatin-like fold	1.63233e-68
CUST_24806_PI422552764	contig01499	1.61195e-06	1.06098	up	2.20027	up	1.09931	down	1.57196	up	---NA---		---NA---
CUST_24807_PI422552764	contig01499	1.28616e-05	1.18731	up	2.34512	up	1.01635	up	1.75471	up	---NA---		---NA---
CUST_24808_PI422552764	contig01499	5.98414e-06	1.0034	down	2.01955	up	1.1791	down	1.50184	up	---NA---		---NA---
CUST_64861_PI422552764	contig01500	7.34822e-08	2.79584	up	1.07888	up	1.78109	up	1.88362	down	---NA---		---NA---
CUST_64862_PI422552764	contig01500	6.69256e-07	2.81254	up	1.00931	down	1.86178	up	1.93273	down	---NA---		---NA---
CUST_64863_PI422552764	contig01500	1.02581e-05	2.79449	up	1.16351	up	1.7618	up	2.00073	down	---NA---		---NA---
CUST_66118_PI422552764	contig01501	0.00129985	1.10673	down	2.47031	down	1.04994	up	1.87559	down	---NA---		---NA---
CUST_66119_PI422552764	contig01501	0.00307908	1.00804	down	2.5269	down	1.22357	up	1.80049	down	---NA---		---NA---
CUST_66120_PI422552764	contig01501	0.00104989	1.12925	down	2.7414	down	1.00409	up	1.98028	down	---NA---		---NA---
CUST_71479_PI422552764	contig01505	6.13379e-05	1.14314	down	4.31752	up	1.2372	up	3.76236	up	art2_yeast ame: full=uncharacterized protein art2 ame: full=antisense to ribosomal rna transcript protein 2	7.94233e-17	senescence-associated protein	1.02216e-65
CUST_7652_PI422552764	contig01506	0.00409826	1.20618	down	2.31512	up	1.01956	up	1.88847	up	---NA---		---NA---
CUST_7654_PI422552764	contig01506	0.000385025	1.53083	down	2.09019	up	1.40464	down	1.4777	up	---NA---		---NA---
CUST_77710_PI422552764	contig01514	5.47593e-10	1.36963	down	2.75584	up	1.06428	up	2.7392	up	---NA---		---NA---
CUST_77711_PI422552764	contig01514	7.40045e-06	1.3914	down	3.26425	up	1.17458	up	2.90129	up	---NA---		---NA---
CUST_77712_PI422552764	contig01514	9.50524e-06	1.30144	down	2.7125	up	1.29312	up	2.76822	up	---NA---		---NA---
CUST_76519_PI422552764	contig01515	2.46353e-05	2.26169	down	1.25537	down	1.63488	down	1.32484	down	---NA---		expressed unknown protein [Ectocarpus siliculosus]	3.12406e-25
CUST_76520_PI422552764	contig01515	9.26086e-08	6.77294	down	1.26563	down	2.12152	down	1.57454	down	---NA---		expressed unknown protein [Ectocarpus siliculosus]	3.12406e-25
CUST_76521_PI422552764	contig01515	2.02992e-08	11.3016	down	1.04849	up	2.8954	down	1.42918	down	---NA---		expressed unknown protein [Ectocarpus siliculosus]	3.12406e-25
CUST_75568_PI422552764	contig01516	0.00034169	4.89772	down	1.79271	down	1.02387	down	1.1498	up	---NA---		---NA---
CUST_75569_PI422552764	contig01516	2.92822e-07	11.1423	down	2.27681	down	1.41058	down	1.02684	down	---NA---		---NA---
CUST_75570_PI422552764	contig01516	8.86352e-07	8.90673	down	1.8844	down	1.33619	down	1.02758	down	---NA---		---NA---
CUST_62794_PI422552764	contig01517	7.21432e-10	1.78903	down	2.49919	up	1.13468	down	1.71034	up	---NA---		---NA---
CUST_62795_PI422552764	contig01517	3.75441e-06	1.68124	down	2.02623	up	1.12025	down	1.71793	up	---NA---		---NA---
CUST_62796_PI422552764	contig01517	6.06731e-09	1.53535	down	2.36172	up	1.02162	down	1.89868	up	---NA---		---NA---
CUST_78442_PI422552764	contig01519	3.46377e-07	1.21521	down	2.35245	down	1.3548	up	1.69622	down	---NA---		hypothetical protein [Ectocarpus siliculosus]	1.06091e-10
CUST_78443_PI422552764	contig01519	7.63881e-09	1.36339	down	2.2456	down	1.46842	up	1.65447	down	---NA---		hypothetical protein [Ectocarpus siliculosus]	1.06091e-10
CUST_78444_PI422552764	contig01519	2.92236e-08	2.0916	down	2.15405	down	1.43188	up	1.68417	down	---NA---		hypothetical protein [Ectocarpus siliculosus]	1.06091e-10
CUST_77953_PI422552764	contig01520	2.87698e-09	8.03497	up	1.61525	up	3.41389	up	1.04928	down	---NA---		---NA---
CUST_77954_PI422552764	contig01520	2.21825e-08	10.4412	up	1.93046	up	3.7778	up	1.02621	down	---NA---		---NA---
CUST_77955_PI422552764	contig01520	1.57913e-06	7.13755	up	1.57065	up	2.97158	up	1.16587	down	---NA---		---NA---
CUST_31357_PI422552764	contig01522	1.70677e-05	2.08816	up	1.0834	down	1.28603	up	1.25816	down	---NA---		conserved unknown protein [Ectocarpus siliculosus]	3.29693e-16
CUST_77447_PI422552764	contig01524	0.00157853	1.20776	down	2.97966	up	1.49608	up	2.15295	up	rpoc2_rhdsa ame: full=dna-directed rna polymerase subunit beta ame: full=pep ame: full=plastid-encoded rna polymerase subunit beta short=rna polymerase subunit beta	9.06644e-131	rna polymerase beta subunit	0
CUST_77448_PI422552764	contig01524	0.000343492	1.30337	down	2.62538	up	1.30555	up	1.84615	up	rpoc2_rhdsa ame: full=dna-directed rna polymerase subunit beta ame: full=pep ame: full=plastid-encoded rna polymerase subunit beta short=rna polymerase subunit beta	9.06644e-131	rna polymerase beta subunit	0
CUST_78505_PI422552764	contig01525	1.39162e-05	4.86455	down	2.00315	up	1.26271	down	1.72403	up	rpoc2_acam1 ame: full=dna-directed rna polymerase subunit beta short=rnap subunit beta ame: full=transcriptase subunit beta ame: full=rna polymerase subunit beta	3.68399e-77	dna-directed rna beta subunit	0
CUST_78506_PI422552764	contig01525	2.31078e-05	4.74289	down	1.77508	up	1.26791	down	1.71275	up	rpoc2_acam1 ame: full=dna-directed rna polymerase subunit beta short=rnap subunit beta ame: full=transcriptase subunit beta ame: full=rna polymerase subunit beta	3.68399e-77	dna-directed rna beta subunit	0
CUST_78507_PI422552764	contig01525	1.44108e-05	4.84507	down	1.85409	up	1.29912	down	1.62667	up	rpoc2_acam1 ame: full=dna-directed rna polymerase subunit beta short=rnap subunit beta ame: full=transcriptase subunit beta ame: full=rna polymerase subunit beta	3.68399e-77	dna-directed rna beta subunit	0
CUST_22775_PI422552764	contig01526	0.00110666	1.0797	up	1.516	down	1.60444	up	2.00594	down	---NA---		---NA---
CUST_68326_PI422552764	contig01527	2.26878e-05	2.78111	down	1.29444	down	1.05993	up	1.0044	up	---NA---		---NA---
CUST_68327_PI422552764	contig01527	0.000259102	2.56291	down	1.35723	down	1.02709	up	1.05012	down	---NA---		---NA---
CUST_68328_PI422552764	contig01527	0.00115226	2.20737	down	1.57543	down	1.08917	up	1.00615	up	---NA---		---NA---
CUST_78548_PI422552764	contig01528	0.00028325	4.63894	down	2.75056	down	1.08624	up	1.40793	down	pip12_orysj ame: full=probable aquaporin pip1-2 ame: full=plasma membrane intrinsic protein 1-2 ame: full= 1 2	1.28642e-18	ame: full=aquaporin pip-type	1.36674e-18
CUST_78549_PI422552764	contig01528	0.000234571	5.05913	down	2.4791	down	1.13181	down	1.68604	down	pip12_orysj ame: full=probable aquaporin pip1-2 ame: full=plasma membrane intrinsic protein 1-2 ame: full= 1 2	1.28642e-18	ame: full=aquaporin pip-type	1.36674e-18
CUST_77152_PI422552764	contig01529	4.07438e-07	21.6079	down	1.34446	down	1.25094	down	1.25442	up	atpi_odosi ame: full=atp synthase subunit chloroplastic ame: full=f-atpase subunit iv ame: full=atp synthase f0 sector subunit a	3.7955e-79	atp synthase cf0 a chain subunit iv	7.0988e-106
CUST_77153_PI422552764	contig01529	4.33145e-07	21.1295	down	1.4033	down	1.2401	down	1.27079	up	atpi_odosi ame: full=atp synthase subunit chloroplastic ame: full=f-atpase subunit iv ame: full=atp synthase f0 sector subunit a	3.7955e-79	atp synthase cf0 a chain subunit iv	7.0988e-106
CUST_77154_PI422552764	contig01529	2.7186e-06	22.1264	down	1.12874	down	1.84668	down	1.00807	down	atpi_odosi ame: full=atp synthase subunit chloroplastic ame: full=f-atpase subunit iv ame: full=atp synthase f0 sector subunit a	3.7955e-79	atp synthase cf0 a chain subunit iv	7.0988e-106
CUST_64348_PI422552764	contig01530	1.68331e-06	26.3387	down	1.05687	down	1.45289	down	1.0777	up	atpd_vauli ame: full=atp synthase subunit chloroplastic ame: full=atp synthase f sector subunit delta ame: full=f-type atpase subunit delta	5.94429e-39	atp synthase cf1 delta chain	9.64451e-80
CUST_64349_PI422552764	contig01530	1.22324e-06	27.9579	down	1.11026	down	1.4603	down	1.05922	up	atpd_vauli ame: full=atp synthase subunit chloroplastic ame: full=atp synthase f sector subunit delta ame: full=f-type atpase subunit delta	5.94429e-39	atp synthase cf1 delta chain	9.64451e-80
CUST_64350_PI422552764	contig01530	1.68482e-06	27.2516	down	1.0491	down	1.45084	down	1.0486	up	atpd_vauli ame: full=atp synthase subunit chloroplastic ame: full=atp synthase f sector subunit delta ame: full=f-type atpase subunit delta	5.94429e-39	atp synthase cf1 delta chain	9.64451e-80
CUST_47521_PI422552764	contig01531	1.97226e-05	3.11389	down	1.28685	down	1.4656	down	1.38517	down	---NA---		---NA---
CUST_47522_PI422552764	contig01531	3.53789e-05	3.21207	down	1.26118	down	1.50653	down	1.4421	down	---NA---		---NA---
CUST_47523_PI422552764	contig01531	1.38304e-06	3.30951	down	1.34937	down	1.56357	down	1.51927	down	---NA---		---NA---
CUST_73402_PI422552764	contig01533	2.88202e-07	12.9797	down	1.65052	down	1.85243	down	1.14088	up	---NA---		---NA---
CUST_73403_PI422552764	contig01533	8.16939e-08	19.4996	down	2.18229	down	1.99287	down	1.17312	up	---NA---		---NA---
CUST_73404_PI422552764	contig01533	2.91431e-09	27.5589	down	2.42899	down	1.98764	down	1.15292	down	---NA---		---NA---
CUST_3256_PI422552764	contig01534	0.000230034	1.08798	down	2.15518	down	2.20358	down	3.72052	down	---NA---		---NA---
CUST_41997_PI422552764	contig01536	0.000556327	2.40593	down	1.38925	down	1.22044	down	1.50114	down	---NA---		---NA---
CUST_70573_PI422552764	contig01537	1.32894e-07	6.74511	down	1.08858	down	2.07404	down	1.11205	down	---NA---		---NA---
CUST_70574_PI422552764	contig01537	1.11684e-07	6.58113	down	1.2484	down	2.11612	down	1.09151	down	---NA---		---NA---
CUST_70575_PI422552764	contig01537	6.28042e-08	6.72694	down	1.19406	down	2.03577	down	1.1049	down	---NA---		---NA---
CUST_73231_PI422552764	contig01538	3.28567e-09	16.9088	down	1.0093	down	2.78919	down	1.19582	up	---NA---		---NA---
CUST_73232_PI422552764	contig01538	5.14274e-10	73.8994	down	1.09195	down	2.81038	down	1.07445	up	---NA---		---NA---
CUST_73233_PI422552764	contig01538	4.27181e-10	120.361	down	1.21584	down	3.14772	down	1.04803	up	---NA---		---NA---
CUST_14027_PI422552764	contig01540	0.00300825	1.5342	up	2.2978	up	1.17117	down	1.20992	up	---NA---		---NA---
CUST_14028_PI422552764	contig01540	0.000837491	1.20005	up	3.68313	up	1.1311	up	1.1641	up	---NA---		---NA---
CUST_71494_PI422552764	contig01541	0.00190217	3.1996	up	1.04242	up	1.79662	up	1.49462	down	---NA---		---NA---
CUST_25922_PI422552764	contig01542	9.49439e-09	2.02345	up	1.18813	down	1.22381	up	1.19336	down	---NA---		---NA---
CUST_25923_PI422552764	contig01542	7.20022e-10	2.05824	up	1.20552	down	1.17339	up	1.31291	down	---NA---		---NA---
CUST_25924_PI422552764	contig01542	8.24693e-09	2.0042	up	1.29926	down	1.1985	up	1.28357	down	---NA---		---NA---
CUST_76975_PI422552764	contig01543	3.86614e-05	5.74194	up	1.23927	up	1.11728	up	1.32132	up	---NA---		---NA---
CUST_76976_PI422552764	contig01543	6.63029e-05	4.03811	up	1.28078	up	1.03235	down	1.35172	up	---NA---		---NA---
CUST_76977_PI422552764	contig01543	0.000381446	2.86737	up	1.15596	up	1.08024	down	1.37886	up	---NA---		---NA---
CUST_5200_PI422552764	contig01544	5.35775e-05	3.60835	up	1.30439	up	2.85676	up	1.09708	down	---NA---		---NA---
CUST_5201_PI422552764	contig01544	9.01711e-06	4.22276	up	2.26362	up	2.95568	up	1.05854	down	---NA---		---NA---
CUST_5202_PI422552764	contig01544	0.00406879	3.72567	up	1.55696	up	2.88295	up	1.30711	up	---NA---		---NA---
CUST_77143_PI422552764	contig01545	6.93562e-05	3.21391	up	1.62022	up	2.93022	up	2.72105	up	---NA---		expressed unknown protein [Ectocarpus siliculosus]	4.72308e-09
CUST_77144_PI422552764	contig01545	1.70176e-05	1.59887	up	1.91842	down	2.34107	up	1.15285	down	---NA---		expressed unknown protein [Ectocarpus siliculosus]	4.72308e-09
CUST_77145_PI422552764	contig01545	0.00229234	1.54777	up	1.21628	down	2.0249	up	1.19595	up	---NA---		expressed unknown protein [Ectocarpus siliculosus]	4.72308e-09
CUST_78328_PI422552764	contig01549	3.30738e-05	2.22491	down	1.32962	down	1.04998	up	1.37761	down	---NA---		conserved unknown protein [Ectocarpus siliculosus]	6.0804e-114
CUST_78329_PI422552764	contig01549	7.92343e-06	2.14817	down	1.65691	down	1.06752	up	1.73518	down	---NA---		conserved unknown protein [Ectocarpus siliculosus]	6.0804e-114
CUST_61726_PI422552764	contig01551	5.93814e-05	2.96736	up	1.81034	up	1.81942	up	1.39997	up	---NA---		---NA---
CUST_61727_PI422552764	contig01551	0.000245915	2.92663	up	1.57825	up	1.67746	up	1.48355	up	---NA---		---NA---
CUST_61728_PI422552764	contig01551	0.00057075	2.719	up	1.65981	up	1.67671	up	1.52367	up	---NA---		---NA---
CUST_77431_PI422552764	contig01552	0.000277518	4.65987	up	1.54096	up	1.89185	up	1.70376	down	rl123_arath ame: full=60s ribosomal protein l12-3	2.58674e-41	ribosomal protein l12	5.92963e-66
CUST_77432_PI422552764	contig01552	0.00104361	2.43421	up	1.18525	up	2.12103	up	1.42435	down	rl123_arath ame: full=60s ribosomal protein l12-3	2.58674e-41	ribosomal protein l12	5.92963e-66
CUST_77433_PI422552764	contig01552	0.000919027	5.92584	up	1.17857	up	5.21342	up	1.2536	down	rl123_arath ame: full=60s ribosomal protein l12-3	2.58674e-41	ribosomal protein l12	5.92963e-66
CUST_63990_PI422552764	contig01555	0.00312355	1.05688	up	2.06364	up	1.36489	up	1.55028	up	---NA---		---NA---
CUST_78553_PI422552764	contig01556	0.00048713	2.11752	down	2.97788	down	1.14319	down	1.19801	down	algg_azovi ame: full=poly(beta-d-mannuronate) c5 epimerase flags: precursor	8.25898e-20	mannuronan c-5-epimerase	7.8982e-107
CUST_78554_PI422552764	contig01556	0.000612748	2.50427	down	3.38969	down	1.07584	down	1.22395	down	algg_azovi ame: full=poly(beta-d-mannuronate) c5 epimerase flags: precursor	8.25898e-20	mannuronan c-5-epimerase	7.8982e-107
CUST_78555_PI422552764	contig01556	0.00142317	2.38293	down	3.29116	down	1.06707	down	1.20665	down	algg_azovi ame: full=poly(beta-d-mannuronate) c5 epimerase flags: precursor	8.25898e-20	mannuronan c-5-epimerase	7.8982e-107
CUST_37084_PI422552764	contig01558	0.000303049	2.13457	down	3.4539	down	1.05965	up	3.11816	down	---NA---		---NA---
CUST_37085_PI422552764	contig01558	0.000182955	2.35747	down	3.6102	down	1.03193	up	3.05747	down	---NA---		---NA---
CUST_37086_PI422552764	contig01558	0.000262287	1.96151	down	3.11312	down	1.13483	up	2.92161	down	---NA---		---NA---
CUST_74584_PI422552764	contig01564	2.91438e-06	1.24571	up	1.92707	down	2.70839	down	3.17819	down	---NA---		---NA---
CUST_74586_PI422552764	contig01564	0.00380702	2.10117	up	1.98049	down	1.44975	down	1.77973	down	---NA---		---NA---
CUST_72695_PI422552764	contig01565	0.0010259	2.94833	down	1.26935	up	1.73275	down	1.07645	down	---NA---		---NA---
CUST_72696_PI422552764	contig01565	3.11994e-05	2.55663	down	1.30129	up	1.3474	down	1.18147	up	---NA---		---NA---
CUST_70378_PI422552764	contig01566	9.59769e-05	2.84283	down	1.07754	down	1.6961	down	1.02388	down	---NA---		---NA---
CUST_70379_PI422552764	contig01566	4.76443e-06	2.95813	down	1.06871	down	1.69039	down	1.00648	up	---NA---		---NA---
CUST_70380_PI422552764	contig01566	1.04716e-05	3.14917	down	1.00407	up	1.97258	down	1.06515	down	---NA---		---NA---
CUST_20048_PI422552764	contig01567	0.00210179	2.2046	down	1.20635	down	1.71629	down	1.30563	down	---NA---		---NA---
CUST_47231_PI422552764	contig01568	4.80338e-05	1.29421	down	2.94588	up	1.15611	down	1.82307	up	---NA---		---NA---
CUST_47232_PI422552764	contig01568	0.00110796	2.06563	down	2.77897	up	1.07369	down	1.74339	up	---NA---		---NA---
CUST_48604_PI422552764	contig01570	0.000774683	2.86012	up	1.74678	up	1.72519	up	1.47351	up	---NA---		---NA---
CUST_48605_PI422552764	contig01570	0.0017003	2.47461	up	1.44707	up	1.55924	up	1.35908	up	---NA---		---NA---
CUST_48606_PI422552764	contig01570	0.000989084	2.67749	up	1.66898	up	1.70702	up	1.48863	up	---NA---		---NA---
CUST_65488_PI422552764	contig01571	2.8352e-09	2.86384	down	3.30216	up	1.10929	down	2.0317	up	---NA---		alanyl-trna synthetase	7.26935e-17
CUST_65489_PI422552764	contig01571	1.0032e-09	3.29645	down	3.6266	up	1.11092	down	2.18955	up	---NA---		alanyl-trna synthetase	7.26935e-17
CUST_65490_PI422552764	contig01571	3.22579e-10	3.01582	down	2.67691	up	1.09598	down	1.93874	up	---NA---		alanyl-trna synthetase	7.26935e-17
CUST_21770_PI422552764	contig01574	1.16132e-07	9.99676	up	1.88212	up	1.13601	down	1.09362	up	---NA---		---NA---
CUST_21771_PI422552764	contig01574	0.00320736	4.5122	up	1.06258	up	1.0172	up	1.72336	up	---NA---		---NA---
CUST_71545_PI422552764	contig01576	3.64692e-05	1.66117	up	7.9628	up	1.35717	up	3.89026	up	---NA---		---NA---
CUST_71546_PI422552764	contig01576	0.000169494	2.39865	up	7.06126	up	1.37235	up	4.51299	up	---NA---		---NA---
CUST_71547_PI422552764	contig01576	2.84998e-08	1.27248	down	5.21988	up	1.08938	down	2.99242	up	---NA---		---NA---
CUST_30704_PI422552764	contig01577	3.96307e-07	5.75399	up	1.67551	down	2.46307	up	4.74635	down	---NA---		---NA---
CUST_30705_PI422552764	contig01577	7.10754e-06	4.29238	up	1.60463	down	2.33792	up	3.10315	down	---NA---		---NA---
CUST_30706_PI422552764	contig01577	2.91366e-07	5.03767	up	1.37231	down	2.31697	up	3.81209	down	---NA---		---NA---
CUST_64847_PI422552764	contig01578	1.57942e-05	2.6133	down	1.13673	down	1.59357	down	1.04502	down	---NA---		---NA---
CUST_64848_PI422552764	contig01578	4.24818e-06	2.70525	down	1.03309	up	1.54623	down	1.16715	up	---NA---		---NA---
CUST_45695_PI422552764	contig01580	0.000567133	1.04451	up	2.73325	down	1.16024	down	1.98136	down	---NA---		---NA---
CUST_45696_PI422552764	contig01580	0.0026731	1.12346	up	2.33106	down	1.00387	down	1.70246	down	---NA---		---NA---
CUST_72517_PI422552764	contig01581	5.33997e-09	14.3673	up	1.92392	down	4.31024	up	1.7762	down	---NA---		conserved unknown protein [Ectocarpus siliculosus]	8.83519e-10
CUST_72518_PI422552764	contig01581	2.55478e-09	14.0734	up	2.00737	down	4.15727	up	1.78033	down	---NA---		conserved unknown protein [Ectocarpus siliculosus]	8.83519e-10
CUST_72519_PI422552764	contig01581	3.27532e-09	13.4389	up	2.24498	down	4.16864	up	1.86587	down	---NA---		conserved unknown protein [Ectocarpus siliculosus]	8.83519e-10
CUST_48475_PI422552764	contig01582	0.00045623	5.63568	up	1.02428	up	1.59544	up	1.07567	up	---NA---		---NA---
CUST_48476_PI422552764	contig01582	0.000190034	3.35407	up	1.1611	down	1.62664	up	1.50903	down	---NA---		---NA---
CUST_48477_PI422552764	contig01582	0.00135832	4.70517	up	1.05088	up	2.41312	up	1.48093	up	---NA---		---NA---
CUST_63231_PI422552764	contig01583	2.42108e-05	1.48961	up	2.09003	down	1.17057	down	2.24588	down	---NA---		---NA---
CUST_67450_PI422552764	contig01586	0.000184467	3.27039	up	2.0028	up	2.12995	up	2.11097	up	---NA---		---NA---
CUST_67452_PI422552764	contig01586	5.4814e-05	4.38962	up	2.69161	up	2.39879	up	2.75763	up	---NA---		---NA---
CUST_72479_PI422552764	contig01592	0.00162205	3.01058	up	3.54865	down	1.27956	up	1.03778	down	---NA---		---NA---
CUST_72480_PI422552764	contig01592	0.00182293	3.10153	up	2.91124	down	1.68351	up	1.13203	up	---NA---		---NA---
CUST_46696_PI422552764	contig01593	3.23581e-05	2.4814	down	1.13394	up	1.68822	down	1.12882	down	---NA---		---NA---
CUST_46697_PI422552764	contig01593	0.000403271	2.6187	down	1.09276	up	1.76504	down	1.19541	down	---NA---		---NA---
CUST_46698_PI422552764	contig01593	0.000203402	2.02515	down	1.00342	up	1.77804	down	1.09207	down	---NA---		---NA---
CUST_72172_PI422552764	contig01595	8.68265e-08	3.87908	down	1.59618	up	2.26371	down	1.72698	up	---NA---		---NA---
CUST_52591_PI422552764	contig01596	0.00415714	2.12689	up	1.58865	up	2.47722	up	1.07035	up	---NA---		---NA---
CUST_52593_PI422552764	contig01596	0.00084761	2.03044	up	1.8415	up	2.77975	up	1.47313	down	---NA---		---NA---
CUST_72091_PI422552764	contig01597	2.45306e-09	62.0667	down	1.031	down	1.64926	down	1.29545	down	fcpb_macpy ame: full=fucoxanthin-chlorophyll a-c binding protein chloroplastic flags: precursor	3.46796e-71	light harvesting complex protein	1.01245e-71
CUST_72092_PI422552764	contig01597	1.49165e-09	61.8071	down	1.01545	down	1.67751	down	1.35246	down	fcpb_macpy ame: full=fucoxanthin-chlorophyll a-c binding protein chloroplastic flags: precursor	3.46796e-71	light harvesting complex protein	1.01245e-71
CUST_72093_PI422552764	contig01597	3.67305e-09	62.4687	down	1.00876	up	1.67688	down	1.33326	down	fcpb_macpy ame: full=fucoxanthin-chlorophyll a-c binding protein chloroplastic flags: precursor	3.46796e-71	light harvesting complex protein	1.01245e-71
CUST_51173_PI422552764	contig01601	2.46452e-05	10.571	up	2.13875	down	2.74776	up	2.01593	down	---NA---		---NA---
CUST_51174_PI422552764	contig01601	5.95184e-06	15.5782	up	3.3117	down	2.73278	up	2.73134	down	---NA---		---NA---
CUST_77965_PI422552764	contig01602	0.00112293	3.0816	up	2.08752	up	1.46262	up	1.77176	up	sumt_schpo ame: full=probable uroporphyrinogen-iii c-methyltransferase	1.1952e-26	tetrapyrrole methylase domain containing protein	1.3514e-82
CUST_77966_PI422552764	contig01602	0.000966639	2.78909	up	2.53338	up	1.4737	up	1.96054	up	sumt_schpo ame: full=probable uroporphyrinogen-iii c-methyltransferase	1.1952e-26	tetrapyrrole methylase domain containing protein	1.3514e-82
CUST_77967_PI422552764	contig01602	0.00151499	2.95254	up	2.59228	up	1.55324	up	2.16708	up	sumt_schpo ame: full=probable uroporphyrinogen-iii c-methyltransferase	1.1952e-26	tetrapyrrole methylase domain containing protein	1.3514e-82
CUST_64849_PI422552764	contig01605	4.46079e-07	7.47192	down	1.0376	up	1.04384	up	1.05649	up	---NA---		---NA---
CUST_64850_PI422552764	contig01605	3.04945e-07	7.80856	down	1.18929	down	1.08473	down	1.09798	down	---NA---		---NA---
CUST_64851_PI422552764	contig01605	4.76431e-07	6.17338	down	1.26009	down	1.12807	up	1.0093	down	---NA---		---NA---
CUST_52382_PI422552764	contig01607	0.000125159	2.2024	up	1.57262	down	1.91766	down	1.22949	down	---NA---		---NA---
CUST_52383_PI422552764	contig01607	2.59491e-05	2.33565	up	1.21532	down	1.27105	down	1.05016	up	---NA---		---NA---
CUST_61679_PI422552764	contig01608	0.000447954	1.03764	up	3.34883	up	1.05931	down	2.42985	up	---NA---		---NA---
CUST_34960_PI422552764	contig01609	2.83661e-05	1.50134	down	4.49699	down	1.01742	down	1.90339	down	---NA---		---NA---
CUST_34961_PI422552764	contig01609	8.31648e-05	1.59598	down	3.69815	down	1.00855	down	1.68152	down	---NA---		---NA---
CUST_34962_PI422552764	contig01609	3.18654e-05	1.76798	down	3.81287	down	1.11129	down	1.84497	down	---NA---		---NA---
CUST_63409_PI422552764	contig01610	0.00315534	1.52645	down	1.88155	down	2.96118	down	4.07456	down	---NA---		---NA---
CUST_63410_PI422552764	contig01610	0.0038725	1.68736	down	1.77298	down	3.43953	down	4.34478	down	---NA---		---NA---
CUST_69613_PI422552764	contig01612	1.80189e-05	3.72367	up	1.20773	up	1.49635	up	1.15244	up	---NA---		---NA---
CUST_69614_PI422552764	contig01612	9.20184e-06	4.24668	up	1.38313	up	1.61081	up	1.29873	up	---NA---		---NA---
CUST_69615_PI422552764	contig01612	1.51124e-05	4.06964	up	1.50121	up	1.73943	up	1.28432	up	---NA---		---NA---
CUST_6807_PI422552764	contig01613	0.00222008	3.62975	up	1.30586	up	2.71966	up	1.12775	down	---NA---		conserved unknown protein [Ectocarpus siliculosus]	8.54377e-09
CUST_6808_PI422552764	contig01613	0.00354785	6.13097	up	1.32757	up	2.40326	up	1.18448	up	---NA---		conserved unknown protein [Ectocarpus siliculosus]	8.54377e-09
CUST_54418_PI422552764	contig01618	7.99847e-07	2.74252	down	1.27872	up	1.72547	down	1.04885	down	---NA---		---NA---
CUST_54419_PI422552764	contig01618	9.66483e-05	2.98752	down	1.0247	up	1.71128	down	1.01517	up	---NA---		---NA---
CUST_54420_PI422552764	contig01618	9.60556e-07	3.71067	down	1.18047	up	1.40622	down	1.15192	up	---NA---		---NA---
CUST_29555_PI422552764	contig01619	8.99783e-10	6.80912	up	1.21854	down	1.09996	up	1.26803	down	---NA---		---NA---
CUST_29556_PI422552764	contig01619	2.26189e-10	7.45197	up	1.11305	down	1.11108	up	1.24952	down	---NA---		---NA---
CUST_29557_PI422552764	contig01619	1.53242e-06	37.6804	up	1.13222	up	5.7087	up	1.54127	up	---NA---		---NA---
CUST_73384_PI422552764	contig01620	0.00139172	2.30763	down	1.42845	up	2.47067	up	2.06913	up	ycf39_odosi ame: full=uncharacterized protein ycf39 ame: full=orf319	5.26428e-72	conserved hypothetical plastid protein ycf39	3.5681e-139
CUST_73385_PI422552764	contig01620	0.00120076	2.15946	down	1.27683	up	2.4434	up	2.1569	up	ycf39_odosi ame: full=uncharacterized protein ycf39 ame: full=orf319	5.26428e-72	conserved hypothetical plastid protein ycf39	3.5681e-139
CUST_73386_PI422552764	contig01620	0.00199251	2.12054	down	1.3543	up	2.0037	up	1.76613	up	ycf39_odosi ame: full=uncharacterized protein ycf39 ame: full=orf319	5.26428e-72	conserved hypothetical plastid protein ycf39	3.5681e-139
CUST_59269_PI422552764	contig01621	2.47398e-07	2.95023	down	1.26652	down	1.81956	down	1.09469	up	---NA---		---NA---
CUST_59270_PI422552764	contig01621	8.16487e-08	2.81723	down	1.1118	down	1.77097	down	1.14795	up	---NA---		---NA---
CUST_59271_PI422552764	contig01621	6.53798e-08	2.87536	down	1.13054	down	1.7796	down	1.12077	up	---NA---		---NA---
CUST_52648_PI422552764	contig01622	5.07197e-06	4.99383	down	1.97633	up	1.32684	down	1.77427	up	rr9_thaps ame: full=30s ribosomal protein chloroplastic	4.30355e-22	30s ribosomal protein s9	6.19918e-53
CUST_52649_PI422552764	contig01622	5.9236e-06	4.75633	down	2.03733	up	1.24182	down	1.83404	up	rr9_thaps ame: full=30s ribosomal protein chloroplastic	4.30355e-22	30s ribosomal protein s9	6.19918e-53
CUST_52650_PI422552764	contig01622	6.32268e-06	4.79267	down	2.03825	up	1.28918	down	1.80799	up	rr9_thaps ame: full=30s ribosomal protein chloroplastic	4.30355e-22	30s ribosomal protein s9	6.19918e-53
CUST_3606_PI422552764	contig01624	5.80205e-06	7.47286	down	1.66027	up	1.49298	down	1.78762	up	rl13_theeb ame: full=50s ribosomal protein l13	6.04649e-28	50s ribosomal protein l13	3.66646e-36
CUST_3607_PI422552764	contig01624	3.69242e-06	7.25927	down	1.94336	up	1.4093	down	1.90488	up	rl13_theeb ame: full=50s ribosomal protein l13	6.04649e-28	50s ribosomal protein l13	3.66646e-36
CUST_3608_PI422552764	contig01624	3.25376e-06	7.05306	down	1.9631	up	1.39412	down	1.92887	up	rl13_theeb ame: full=50s ribosomal protein l13	6.04649e-28	50s ribosomal protein l13	3.66646e-36
CUST_69189_PI422552764	contig01625	2.05545e-05	1.09181	down	2.29327	up	1.07532	up	3.10645	up	---NA---		---NA---
CUST_41734_PI422552764	contig01626	9.68344e-05	2.39961	up	1.00351	down	1.88404	up	1.10063	up	---NA---		---NA---
CUST_41735_PI422552764	contig01626	0.000171151	2.65087	up	1.18218	up	1.92569	up	1.1978	up	---NA---		---NA---
CUST_41736_PI422552764	contig01626	0.000258562	2.6744	up	1.24257	up	2.05629	up	1.16559	up	---NA---		---NA---
CUST_48764_PI422552764	contig01628	0.000452174	2.48804	up	4.60816	up	2.5735	up	2.8548	up	---NA---		---NA---
CUST_39228_PI422552764	contig01629	0.000323609	3.51011	up	1.3473	up	2.50609	up	1.09159	up	---NA---		---NA---
CUST_77941_PI422552764	contig01630	0.00124636	5.0219	down	1.02243	down	1.22175	down	1.55234	up	y114_chlmu ame: full=uncharacterized protein tc_0114	1.11267e-24	cell wall-associated hydrolase	3.0359e-34
CUST_77942_PI422552764	contig01630	0.00172382	5.67322	down	1.0526	down	1.32663	down	1.51287	up	y114_chlmu ame: full=uncharacterized protein tc_0114	1.11267e-24	cell wall-associated hydrolase	3.0359e-34
CUST_73795_PI422552764	contig01631	4.74772e-10	162.22	down	1.74469	down	2.87805	down	1.32947	down	---NA---		---NA---
CUST_73796_PI422552764	contig01631	9.15087e-11	137.119	down	1.70153	down	2.72068	down	1.37518	down	---NA---		---NA---
CUST_73797_PI422552764	contig01631	8.90601e-12	166.774	down	2.03576	down	2.7567	down	1.55414	down	---NA---		---NA---
CUST_52077_PI422552764	contig01633	0.0023033	2.65006	up	1.32741	up	2.40952	up	2.72965	up	---NA---		---NA---
CUST_63385_PI422552764	contig01634	2.39407e-07	11.793	up	1.37732	up	1.31469	up	1.02028	up	---NA---		---NA---
CUST_63386_PI422552764	contig01634	1.109e-05	26.968	up	2.68427	up	1.98491	up	1.46205	up	---NA---		---NA---
CUST_63387_PI422552764	contig01634	3.25953e-05	20.2139	up	2.02991	up	1.65843	up	2.16783	up	---NA---		---NA---
CUST_72461_PI422552764	contig01635	0.00182299	2.43629	up	1.17386	down	2.12295	up	1.36865	up	---NA---		---NA---
CUST_72462_PI422552764	contig01635	0.00264184	1.55361	up	2.07296	down	1.17613	up	1.00827	down	---NA---		---NA---
CUST_56737_PI422552764	contig01636	6.62951e-06	3.68998	down	1.08375	up	1.46753	down	1.13003	down	---NA---		---NA---
CUST_56738_PI422552764	contig01636	0.000268595	2.47278	down	1.04924	up	1.2202	down	1.10129	down	---NA---		---NA---
CUST_64351_PI422552764	contig01638	1.14773e-07	4.35317	down	1.57684	down	1.15019	down	1.52465	down	---NA---		---NA---
CUST_64352_PI422552764	contig01638	1.36809e-07	5.35618	down	1.50585	down	1.06084	down	1.2727	down	---NA---		---NA---
CUST_64353_PI422552764	contig01638	4.77495e-09	4.92652	down	1.34409	down	1.16292	down	1.28779	down	---NA---		---NA---
CUST_74863_PI422552764	contig01639	1.01914e-07	1.75873	down	3.87731	up	1.29178	up	3.9923	up	metk_dicdi ame: full=s-adenosylmethionine synthase short= et synthase ame: full=methionine adenosyltransferase short=mat	2.34213e-19	methionine s-adenosyl transferase	5.29115e-36
CUST_74864_PI422552764	contig01639	3.5454e-08	2.0558	down	2.4967	up	1.04128	up	3.08837	up	metk_dicdi ame: full=s-adenosylmethionine synthase short= et synthase ame: full=methionine adenosyltransferase short=mat	2.34213e-19	methionine s-adenosyl transferase	5.29115e-36
CUST_74865_PI422552764	contig01639	1.19449e-06	2.62858	down	2.69321	up	1.23304	up	3.70173	up	metk_dicdi ame: full=s-adenosylmethionine synthase short= et synthase ame: full=methionine adenosyltransferase short=mat	2.34213e-19	methionine s-adenosyl transferase	5.29115e-36
CUST_1756_PI422552764	contig01640	2.37905e-05	2.04515	up	1.33045	down	4.7752	up	2.39418	down	---NA---		---NA---
CUST_1757_PI422552764	contig01640	1.3678e-06	3.45873	up	1.43904	up	7.76783	up	1.46431	down	---NA---		---NA---
CUST_1758_PI422552764	contig01640	1.00991e-07	3.43498	up	1.008	up	7.61712	up	1.69588	down	---NA---		---NA---
CUST_51547_PI422552764	contig01641	3.44122e-08	1.82021	up	5.48299	down	2.37802	up	3.60549	down	gst1_ascsu ame: full=glutathione s-transferase 1 ame: full=gst class-sigma	1.18697e-11	glutathione s-transferase	4.76978e-87
CUST_51548_PI422552764	contig01641	5.6311e-08	1.87569	up	5.65189	down	2.42933	up	3.54164	down	gst1_ascsu ame: full=glutathione s-transferase 1 ame: full=gst class-sigma	1.18697e-11	glutathione s-transferase	4.76978e-87
CUST_51549_PI422552764	contig01641	7.03653e-08	1.88242	up	5.59114	down	2.43979	up	3.50477	down	gst1_ascsu ame: full=glutathione s-transferase 1 ame: full=gst class-sigma	1.18697e-11	glutathione s-transferase	4.76978e-87
CUST_72559_PI422552764	contig01643	9.9792e-05	4.94221	up	1.24144	up	1.16798	down	1.13363	down	cah6_mouse ame: full=carbonic anhydrase 6 ame: full=carbonic anhydrase vi short=ca-vi ame: full=carbonate dehydratase vi ame: full=secreted carbonic anhydrase ame: full=salivary carbonic anhydrase flags: precursor	3.91281e-09	carbonic anhydrase	2.62344e-54
CUST_72561_PI422552764	contig01643	0.000529146	2.68653	up	1.85531	up	3.07715	down	1.01242	up	cah6_mouse ame: full=carbonic anhydrase 6 ame: full=carbonic anhydrase vi short=ca-vi ame: full=carbonate dehydratase vi ame: full=secreted carbonic anhydrase ame: full=salivary carbonic anhydrase flags: precursor	3.91281e-09	carbonic anhydrase	2.62344e-54
CUST_18167_PI422552764	contig01645	0.0021073	4.39327	up	1.81062	up	1.20461	up	1.35631	up	---NA---		---NA---
CUST_18168_PI422552764	contig01645	0.000435808	2.57431	up	2.20719	up	2.03819	up	1.28539	up	---NA---		---NA---
CUST_78588_PI422552764	contig01648	2.34652e-06	4.26872	up	1.51995	down	1.82812	up	1.12618	down	enpl_horvu ame: full=endoplasmin homolog ame: full=glucose-regulated protein 94 homolog short=grp-94 homolog flags: precursor	0	shd atp binding unfolded protein binding	0
CUST_896_PI422552764	contig01650	0.00105815	1.05302	up	3.17906	up	1.20372	up	2.12788	up	top1_syne7 ame: full=dna topoisomerase 1 ame: full=dna topoisomerase i ame: full=omega-protein ame: full=relaxing enzyme ame: full=untwisting enzyme ame: full=swivelase	4.14558e-13	dna topoisomerase i	7.33459e-32
CUST_897_PI422552764	contig01650	0.00118259	1.97619	up	5.2283	up	2.36672	up	2.77507	up	top1_syne7 ame: full=dna topoisomerase 1 ame: full=dna topoisomerase i ame: full=omega-protein ame: full=relaxing enzyme ame: full=untwisting enzyme ame: full=swivelase	4.14558e-13	dna topoisomerase i	7.33459e-32
CUST_58699_PI422552764	contig01653	3.70922e-07	2.20412	up	1.3468	down	1.52019	up	1.1416	down	---NA---		---NA---
CUST_58700_PI422552764	contig01653	2.37147e-07	2.16482	up	1.69219	down	1.45671	up	1.33403	down	---NA---		---NA---
CUST_58701_PI422552764	contig01653	1.55456e-07	2.13038	up	1.81689	down	1.51699	up	1.37016	down	---NA---		---NA---
CUST_75890_PI422552764	contig01655	0.00159808	2.86345	down	1.95814	down	1.19932	down	1.32325	down	aig2l_arath ame: full=aig2-like protein ame: full= gamma-glutamylcyclotransferase	7.31417e-09	aig2-like protein	1.94577e-58
CUST_49012_PI422552764	contig01656	0.00145735	2.90773	up	2.43993	up	2.43022	up	1.13716	up	---NA---		---NA---
CUST_49014_PI422552764	contig01656	0.00292887	3.01681	up	1.2657	up	1.39603	up	1.54705	down	---NA---		---NA---
CUST_11132_PI422552764	contig01657	2.09385e-08	1.96376	up	4.57978	down	2.18596	up	3.89667	down	---NA---		glutathione s-transferase	4.32898e-45
CUST_11133_PI422552764	contig01657	1.34818e-08	2.17902	up	4.23573	down	2.14354	up	3.61005	down	---NA---		glutathione s-transferase	4.32898e-45
CUST_11134_PI422552764	contig01657	1.12327e-08	2.10337	up	4.16804	down	2.04656	up	3.68693	down	---NA---		glutathione s-transferase	4.32898e-45
CUST_5942_PI422552764	contig01658	5.63068e-09	5.638	up	4.56259	down	2.78758	up	4.55144	down	---NA---		glutathione s-transferase	8.58436e-33
CUST_5943_PI422552764	contig01658	1.78141e-09	6.24674	up	4.37753	down	2.73455	up	4.4194	down	---NA---		glutathione s-transferase	8.58436e-33
CUST_5944_PI422552764	contig01658	4.93946e-09	6.50751	up	4.48714	down	2.77809	up	4.32084	down	---NA---		glutathione s-transferase	8.58436e-33
CUST_24809_PI422552764	contig01659	0.000105513	1.22739	up	2.45082	down	2.18171	up	3.20727	down	---NA---		---NA---
CUST_24810_PI422552764	contig01659	0.000103815	1.19133	up	2.55886	down	2.02672	up	3.29215	down	---NA---		---NA---
CUST_24811_PI422552764	contig01659	7.10382e-05	1.13274	up	2.62492	down	1.99315	up	3.45567	down	---NA---		---NA---
CUST_77416_PI422552764	contig01662	9.3642e-06	2.48759	up	1.02518	up	1.16069	up	1.15888	up	---NA---		---NA---
CUST_77418_PI422552764	contig01662	0.00016427	2.15738	up	1.31382	down	1.1245	up	1.05907	down	---NA---		---NA---
CUST_73043_PI422552764	contig01675	1.31133e-07	1.001	down	2.29548	down	1.20681	up	1.49624	down	spkul_dicdi ame: full=bifunctional serine threonine-protein kinase nedd4-like e3 ubiquitin-protein ligase includes: ame: full=probable serine threonine-protein kinase ddb_g0276527 includes: ame: full=probable nedd4-like e3 ubiquitin-protein ligase ddb_g02	1.32009e-15	map kinase kinase-like protein	9.49916e-31
CUST_73044_PI422552764	contig01675	7.74681e-06	1.0068	up	2.027	down	1.12894	up	1.62348	down	spkul_dicdi ame: full=bifunctional serine threonine-protein kinase nedd4-like e3 ubiquitin-protein ligase includes: ame: full=probable serine threonine-protein kinase ddb_g0276527 includes: ame: full=probable nedd4-like e3 ubiquitin-protein ligase ddb_g02	1.32009e-15	map kinase kinase-like protein	9.49916e-31
CUST_2376_PI422552764	contig01676	6.06168e-09	6.10951	up	4.8526	down	5.76533	up	4.21388	down	---NA---		---NA---
CUST_2377_PI422552764	contig01676	1.2825e-08	5.75482	up	3.26809	down	5.55444	up	3.68532	down	---NA---		---NA---
CUST_2378_PI422552764	contig01676	7.33994e-09	5.47347	up	4.30211	down	4.89262	up	4.29414	down	---NA---		---NA---
CUST_67843_PI422552764	contig01677	5.00001e-09	3.29913	up	20.2248	down	3.08857	up	7.59641	down	---NA---		---NA---
CUST_67844_PI422552764	contig01677	2.27673e-07	9.25057	up	1.38945	down	2.59404	up	1.09796	down	---NA---		---NA---
CUST_67845_PI422552764	contig01677	2.16342e-08	20.634	up	4.7828	down	5.47846	up	7.72635	down	---NA---		---NA---
CUST_61267_PI422552764	contig01679	1.45826e-07	4.6082	down	1.2746	up	1.23724	down	1.02428	down	---NA---		---NA---
CUST_61268_PI422552764	contig01679	8.44098e-07	4.4995	down	1.1638	up	1.31022	down	1.01515	down	---NA---		---NA---
CUST_61269_PI422552764	contig01679	1.27173e-08	4.1954	down	1.26189	up	1.19365	down	1.00905	up	---NA---		---NA---
CUST_77629_PI422552764	contig01680	0.000439227	1.59692	up	3.0241	down	1.49671	up	1.56182	down	---NA---		---NA---
CUST_42883_PI422552764	contig01687	0.00101482	2.90932	up	1.47283	up	1.81032	up	1.23659	up	---NA---		---NA---
CUST_76700_PI422552764	contig01688	0.000240181	1.03799	up	2.05994	down	2.09837	down	1.5402	down	---NA---		---NA---
CUST_76701_PI422552764	contig01688	0.00157149	1.0236	up	2.32613	down	1.78586	down	1.59208	down	---NA---		---NA---
CUST_75101_PI422552764	contig01689	0.000740739	2.62923	up	1.30716	down	1.15311	up	1.24143	down	---NA---		---NA---
CUST_59443_PI422552764	contig01691	4.40213e-06	6.99759	down	2.76685	down	1.92066	down	1.33423	down	---NA---		---NA---
CUST_74785_PI422552764	contig01692	1.36033e-09	17.5652	down	1.12823	up	1.34925	down	1.23028	up	---NA---		---NA---
CUST_74786_PI422552764	contig01692	1.84002e-09	22.2542	down	1.14679	up	1.26866	down	1.24326	up	---NA---		---NA---
CUST_74787_PI422552764	contig01692	9.64861e-10	25.0666	down	1.16652	up	1.41049	down	1.23535	up	---NA---		---NA---
CUST_10368_PI422552764	contig01695	0.00239486	1.32387	up	2.7294	up	1.83726	up	1.05015	down	---NA---		---NA---
CUST_50617_PI422552764	contig01698	0.00323684	1.02168	down	1.02046	down	1.0674	up	3.06358	up	---NA---		---NA---
CUST_70411_PI422552764	contig01700	0.00159809	5.80464	up	1.08467	down	1.70078	up	1.0943	up	---NA---		---NA---
CUST_70412_PI422552764	contig01700	0.000906557	4.42509	up	1.1635	up	1.84044	up	1.12371	up	---NA---		---NA---
CUST_70413_PI422552764	contig01700	0.00174289	2.83952	up	2.02258	down	2.29421	up	1.42246	down	---NA---		---NA---
CUST_67471_PI422552764	contig01703	1.13648e-06	2.66041	down	3.10327	down	1.11066	up	3.22319	down	---NA---		protein	1.92547e-29
CUST_67472_PI422552764	contig01703	1.1895e-06	2.68908	down	3.11706	down	1.01945	down	3.2801	down	---NA---		protein	1.92547e-29
CUST_67473_PI422552764	contig01703	0.000745478	2.67314	down	1.93671	down	1.06908	down	3.05874	down	---NA---		protein	1.92547e-29
CUST_65632_PI422552764	contig01704	0.000227529	1.79453	up	2.34153	up	1.13373	up	1.15545	up	ubc2_medsa ame: full=ubiquitin-conjugating enzyme e2 2 ame: full=ubiquitin-conjugating enzyme e2-17 kda 2 ame: full=ubiquitin-protein ligase 2 ame: full=ubiquitin carrier protein 2	2.87244e-55	ubiquitin-conjugating enzyme	9.17231e-60
CUST_64008_PI422552764	contig01705	0.00151597	1.30132	up	2.09912	up	1.10468	up	1.50115	up	---NA---		---NA---
CUST_69505_PI422552764	contig01706	5.22049e-06	3.38332	down	2.42551	up	1.20623	down	1.56953	up	kprs_helpj ame: full=ribose-phosphate pyrophosphokinase short=rppk ame: full=phosphoribosyl pyrophosphate synthase short=p-rib-pp synthase short=prpp synthase	5.11197e-73	ribose-phosphate pyrophosphokinase	2.2782e-167
CUST_69506_PI422552764	contig01706	4.06525e-07	4.18655	down	2.32152	up	1.32503	down	1.4727	up	kprs_helpj ame: full=ribose-phosphate pyrophosphokinase short=rppk ame: full=phosphoribosyl pyrophosphate synthase short=p-rib-pp synthase short=prpp synthase	5.11197e-73	ribose-phosphate pyrophosphokinase	2.2782e-167
CUST_69507_PI422552764	contig01706	8.6424e-07	3.45443	down	2.58681	up	1.15314	down	1.69855	up	kprs_helpj ame: full=ribose-phosphate pyrophosphokinase short=rppk ame: full=phosphoribosyl pyrophosphate synthase short=p-rib-pp synthase short=prpp synthase	5.11197e-73	ribose-phosphate pyrophosphokinase	2.2782e-167
CUST_57062_PI422552764	contig01708	3.70338e-05	3.42323	down	1.48929	down	1.26952	down	1.20378	down	---NA---		---NA---
CUST_57063_PI422552764	contig01708	0.00274926	4.93471	down	1.5102	down	1.28105	down	1.33978	down	---NA---		---NA---
CUST_78269_PI422552764	contig01709	0.000760949	1.32886	down	2.58145	up	1.83989	up	2.26667	up	ycf24_porye ame: full=upf0051 protein ycf24	1.98424e-170	abc transporter	0
CUST_78270_PI422552764	contig01709	0.000582971	1.43886	down	3.22957	up	1.71521	up	2.17582	up	ycf24_porye ame: full=upf0051 protein ycf24	1.98424e-170	abc transporter	0
CUST_45322_PI422552764	contig01713	1.3906e-07	9.13061	down	1.77087	down	1.37718	down	1.27439	down	---NA---		---NA---
CUST_45323_PI422552764	contig01713	4.3404e-08	9.8094	down	1.55583	down	1.57065	down	1.35978	down	---NA---		---NA---
CUST_45324_PI422552764	contig01713	8.55043e-08	5.72108	down	1.37205	down	1.42739	down	1.22286	down	---NA---		---NA---
CUST_77968_PI422552764	contig01716	0.00211823	1.24964	down	2.31907	down	1.00715	down	1.90762	down	---NA---		expressed unknown protein [Ectocarpus siliculosus]	3.221e-84
CUST_77969_PI422552764	contig01716	0.0014324	1.23243	down	2.00554	down	1.10734	up	1.76203	down	---NA---		expressed unknown protein [Ectocarpus siliculosus]	3.221e-84
CUST_77449_PI422552764	contig01717	0.000346246	9.89699	down	1.34165	down	4.90614	down	1.65399	down	---NA---		---NA---
CUST_77450_PI422552764	contig01717	0.000169412	7.66142	down	1.42274	down	4.498	down	1.72544	down	---NA---		---NA---
CUST_77451_PI422552764	contig01717	0.000121588	4.09111	down	1.45836	down	2.60773	down	1.58457	down	---NA---		---NA---
CUST_47233_PI422552764	contig01719	0.00192802	3.05883	up	1.66296	up	3.69084	up	1.54984	up	---NA---		---NA---
CUST_74650_PI422552764	contig01720	7.97815e-09	8.31634	down	1.01511	down	4.34693	down	2.06397	up	---NA---		---NA---
CUST_74651_PI422552764	contig01720	2.35238e-08	5.5294	down	1.23289	down	3.67698	down	2.10692	up	---NA---		---NA---
CUST_74652_PI422552764	contig01720	9.36767e-08	7.0475	down	1.45475	down	4.34979	down	2.07163	up	---NA---		---NA---
CUST_77239_PI422552764	contig01721	0.00223845	1.0454	down	2.61297	down	1.01663	down	1.14755	down	---NA---		---NA---
CUST_77241_PI422552764	contig01721	0.00249945	1.52733	up	2.31139	down	1.10861	up	1.0093	up	---NA---		---NA---
CUST_49072_PI422552764	contig01723	4.40833e-10	15.8353	down	1.06139	down	1.59654	down	1.42602	down	---NA---		---NA---
CUST_49073_PI422552764	contig01723	1.61339e-07	7.51099	down	1.23971	down	1.21071	down	1.94232	down	---NA---		---NA---
CUST_49074_PI422552764	contig01723	1.55727e-09	12.9399	down	1.03837	down	1.47206	down	1.2017	down	---NA---		---NA---
CUST_69607_PI422552764	contig01724	3.26342e-05	1.65242	down	2.06624	up	1.52714	up	1.69241	up	---NA---		transmembrane protein	5.34669e-31
CUST_76558_PI422552764	contig01727	0.00294461	4.04806	up	3.07081	up	1.82512	up	1.38064	up	---NA---		c2h2 zinc ankyrin repeat protein	5.57988e-22
CUST_76559_PI422552764	contig01727	0.000145788	5.11109	up	2.08757	up	1.67287	up	1.07287	down	---NA---		c2h2 zinc ankyrin repeat protein	5.57988e-22
CUST_76560_PI422552764	contig01727	2.45633e-05	7.90197	up	4.05205	up	2.50158	up	1.21685	up	---NA---		c2h2 zinc ankyrin repeat protein	5.57988e-22
CUST_33829_PI422552764	contig01728	0.000100792	2.52119	up	2.55211	down	1.6894	up	1.12009	up	---NA---		---NA---
CUST_33830_PI422552764	contig01728	0.000183436	2.43408	up	1.65172	down	1.63752	up	1.1866	up	---NA---		---NA---
CUST_33831_PI422552764	contig01728	0.00224802	4.05752	up	3.20024	down	2.08221	up	1.00227	down	---NA---		---NA---
CUST_4368_PI422552764	contig01729	0.00113977	9.21064	up	1.07351	down	3.12983	up	1.79904	up	---NA---		---NA---
CUST_4369_PI422552764	contig01729	0.000571116	13.1077	up	1.4047	up	4.33727	up	2.49203	up	---NA---		---NA---
CUST_4370_PI422552764	contig01729	0.00126158	9.11685	up	1.03292	up	4.14956	up	1.64913	up	---NA---		---NA---
CUST_78151_PI422552764	contig01731	1.84556e-08	1.49101	down	2.2599	up	1.07292	up	1.05923	down	crti_arath ame: full=phytoene chloroplastic chromoplastic ame: full=phytoene desaturase flags: precursor	3.92366e-176	phytoene desaturase	0
CUST_78152_PI422552764	contig01731	1.36292e-07	1.58017	down	2.1759	up	1.04119	up	1.09592	down	crti_arath ame: full=phytoene chloroplastic chromoplastic ame: full=phytoene desaturase flags: precursor	3.92366e-176	phytoene desaturase	0
CUST_78153_PI422552764	contig01731	1.84325e-07	1.47913	down	2.23209	up	1.05759	up	1.0879	down	crti_arath ame: full=phytoene chloroplastic chromoplastic ame: full=phytoene desaturase flags: precursor	3.92366e-176	phytoene desaturase	0
CUST_76012_PI422552764	contig01732	2.33984e-07	4.73714	down	1.10748	up	1.03469	up	1.12782	up	bcp_bacsu ame: full= peroxiredoxin ygaf ame: full=thioredoxin reductase ame: full=bacterioferritin comigratory protein	2.2195e-21	alkyl hydroperoxide reductase thiol specific antioxidant mal allergen	1.45519e-69
CUST_76013_PI422552764	contig01732	2.17075e-06	3.72859	down	1.00145	down	1.12072	up	1.11158	up	bcp_bacsu ame: full= peroxiredoxin ygaf ame: full=thioredoxin reductase ame: full=bacterioferritin comigratory protein	2.2195e-21	alkyl hydroperoxide reductase thiol specific antioxidant mal allergen	1.45519e-69
CUST_76014_PI422552764	contig01732	2.72883e-06	3.62639	down	1.02554	up	1.1514	up	1.07839	up	bcp_bacsu ame: full= peroxiredoxin ygaf ame: full=thioredoxin reductase ame: full=bacterioferritin comigratory protein	2.2195e-21	alkyl hydroperoxide reductase thiol specific antioxidant mal allergen	1.45519e-69
CUST_18371_PI422552764	contig01734	1.48973e-05	6.63847	up	1.43352	up	4.7945	up	1.23918	down	---NA---		---NA---
CUST_18372_PI422552764	contig01734	0.000662341	4.38946	up	1.10462	down	3.42675	up	1.41255	up	---NA---		---NA---
CUST_18373_PI422552764	contig01734	2.88739e-08	7.16928	up	1.3851	up	4.57958	up	1.26447	up	---NA---		---NA---
CUST_68860_PI422552764	contig01737	0.000305994	2.48516	up	1.18745	up	2.01415	up	1.14292	up	rpab5_arath ame: full=dna-directed rna polymerases and iii subunit rpabc5 short=rna polymerases and iii subunit abc5 ame: full=dna-directed rna polymerase iii subunit l ame: full=abc10 ame: full=rpb10 homolog	1.69839e-25	protein	4.43026e-27
CUST_68861_PI422552764	contig01737	3.17821e-06	4.01927	up	1.08717	up	2.13575	up	1.26828	up	rpab5_arath ame: full=dna-directed rna polymerases and iii subunit rpabc5 short=rna polymerases and iii subunit abc5 ame: full=dna-directed rna polymerase iii subunit l ame: full=abc10 ame: full=rpb10 homolog	1.69839e-25	protein	4.43026e-27
CUST_68862_PI422552764	contig01737	0.00272114	2.55254	up	1.50878	down	1.94694	up	1.36355	down	rpab5_arath ame: full=dna-directed rna polymerases and iii subunit rpabc5 short=rna polymerases and iii subunit abc5 ame: full=dna-directed rna polymerase iii subunit l ame: full=abc10 ame: full=rpb10 homolog	1.69839e-25	protein	4.43026e-27
CUST_6536_PI422552764	contig01738	0.00124435	1.94099	up	9.31615	down	3.50634	up	3.12054	down	---NA---		cell wall-associated hydrolase	1.90152e-24
CUST_6537_PI422552764	contig01738	0.00156815	1.90691	up	9.6178	down	3.54325	up	3.17946	down	---NA---		cell wall-associated hydrolase	1.90152e-24
CUST_6538_PI422552764	contig01738	0.00173432	1.85994	up	9.71661	down	3.34509	up	3.26468	down	---NA---		cell wall-associated hydrolase	1.90152e-24
CUST_6539_PI422552764	contig01741	0.00371582	11.9149	down	1.78045	down	2.27698	down	1.61444	up	---NA---		low quality protein: cell wall-associated hydrolase	1.0434e-22
CUST_6540_PI422552764	contig01741	0.00315911	12.0562	down	1.76038	down	2.28212	down	1.62117	up	---NA---		low quality protein: cell wall-associated hydrolase	1.0434e-22
CUST_6541_PI422552764	contig01741	0.00376241	13.7377	down	1.86162	down	2.4853	down	1.61512	up	---NA---		low quality protein: cell wall-associated hydrolase	1.0434e-22
CUST_46807_PI422552764	contig01742	0.0041606	1.0319	down	1.18095	down	2.28489	up	1.38171	down	---NA---		---NA---
CUST_75280_PI422552764	contig01743	7.80378e-06	3.51737	down	1.01509	down	1.85611	down	1.29711	up	---NA---		---NA---
CUST_75281_PI422552764	contig01743	5.15864e-06	2.82355	down	1.1938	down	1.69971	down	1.28974	up	---NA---		---NA---
CUST_75282_PI422552764	contig01743	5.95486e-06	2.76557	down	1.03268	down	1.67635	down	1.25794	up	---NA---		---NA---
CUST_29767_PI422552764	contig01745	0.00150117	1.97094	up	3.44252	up	1.29237	up	3.59463	up	---NA---		---NA---
CUST_67054_PI422552764	contig01746	1.66151e-06	4.10144	up	4.18054	up	1.17887	up	1.49376	up	---NA---		---NA---
CUST_67055_PI422552764	contig01746	0.000961088	5.39905	up	2.99423	up	2.12407	up	1.51146	up	---NA---		---NA---
CUST_67056_PI422552764	contig01746	6.66412e-08	6.26222	up	3.79479	up	1.14028	up	1.19322	up	---NA---		---NA---
CUST_63022_PI422552764	contig01749	3.54122e-07	1.06398	down	3.62698	up	1.08203	down	2.57286	up	---NA---		---NA---
CUST_63023_PI422552764	contig01749	1.20605e-06	1.01083	down	3.1161	up	1.05104	down	2.4861	up	---NA---		---NA---
CUST_63024_PI422552764	contig01749	2.97085e-06	1.1539	up	3.32859	up	1.03996	up	2.59652	up	---NA---		---NA---
CUST_76651_PI422552764	contig01750	0.000384339	3.78545	up	1.10809	up	1.63135	up	2.07611	up	---NA---		---NA---
CUST_43030_PI422552764	contig01755	0.0020936	4.02489	down	1.37729	up	1.05382	down	1.6476	up	---NA---		predicted protein [Populus trichocarpa]	2.66995e-29
CUST_47626_PI422552764	contig01756	6.12929e-05	2.02005	up	2.10922	down	1.1417	down	1.54529	down	---NA---		---NA---
CUST_47628_PI422552764	contig01756	2.30589e-05	2.33706	up	1.44753	down	1.16636	up	1.15808	down	---NA---		---NA---
CUST_1047_PI422552764	contig01757	0.000251725	1.34084	up	2.06914	up	1.13635	up	1.03541	down	---NA---		---NA---
CUST_44647_PI422552764	contig01758	1.34088e-05	3.23528	up	2.14815	up	1.3833	up	1.27823	up	---NA---		---NA---
CUST_44648_PI422552764	contig01758	0.00157117	2.10156	up	1.53195	up	1.06845	down	1.12438	down	---NA---		---NA---
CUST_44649_PI422552764	contig01758	0.000171779	2.25508	up	1.55652	up	1.02226	up	1.09917	down	---NA---		---NA---
CUST_53044_PI422552764	contig01761	5.56379e-05	8.66726	down	1.76332	up	1.0132	down	1.1247	up	---NA---		---NA---
CUST_53045_PI422552764	contig01761	0.000110277	6.79316	down	1.35489	up	1.64366	down	1.1975	down	---NA---		---NA---
CUST_53046_PI422552764	contig01761	4.98925e-06	5.403	down	2.20308	up	1.14959	down	1.42831	up	---NA---		---NA---
CUST_77866_PI422552764	contig01762	3.60201e-05	6.92702	down	1.15707	up	1.07348	up	1.15141	down	clpc_cyaca ame: full=atp-dependent clp protease atp-binding subunit clpa homolog	0	atp-dependent clp protease atp-binding subunit	0
CUST_77867_PI422552764	contig01762	8.86615e-05	6.50046	down	1.11695	up	1.04901	up	1.14794	down	clpc_cyaca ame: full=atp-dependent clp protease atp-binding subunit clpa homolog	0	atp-dependent clp protease atp-binding subunit	0
CUST_74212_PI422552764	contig01763	2.81752e-08	6.87559	down	1.72193	down	1.68382	down	1.28716	down	---NA---		---NA---
CUST_74213_PI422552764	contig01763	7.51314e-08	7.11361	down	1.80069	down	1.75635	down	1.47246	down	---NA---		---NA---
CUST_68881_PI422552764	contig01764	0.000968388	4.00286	up	1.69438	up	3.51244	up	2.06331	up	---NA---		---NA---
CUST_6974_PI422552764	contig01766	0.00303521	1.12242	up	3.32974	down	1.07863	up	1.4599	down	---NA---		---NA---
CUST_6975_PI422552764	contig01766	0.00366651	1.12032	up	3.34566	down	1.08634	up	1.44251	down	---NA---		---NA---
CUST_52840_PI422552764	contig01771	5.95132e-06	2.26366	up	2.84157	up	1.48853	up	1.92962	up	---NA---		---NA---
CUST_52841_PI422552764	contig01771	2.08143e-06	2.37428	up	2.96401	up	1.53834	up	1.90821	up	---NA---		---NA---
CUST_52842_PI422552764	contig01771	1.0269e-05	2.18953	up	2.74049	up	1.47459	up	1.86051	up	---NA---		---NA---
CUST_42130_PI422552764	contig01772	0.00125586	2.74385	up	2.01165	up	2.49775	up	1.46481	up	---NA---		---NA---
CUST_42132_PI422552764	contig01772	5.84498e-06	1.75374	up	2.71429	up	1.24164	up	1.91141	up	---NA---		---NA---
CUST_64613_PI422552764	contig01778	0.00011638	2.13157	up	1.73766	down	1.36583	up	1.50425	down	rbx1_salsa ame: full=ring-box protein 1 short=rbx1 ame: full=hyperosmotic protein 21 short=shop21	1.18175e-26	ring-box protein	3.50149e-69
CUST_64614_PI422552764	contig01778	2.12036e-05	2.47913	up	1.39103	down	1.41826	up	1.2958	down	rbx1_salsa ame: full=ring-box protein 1 short=rbx1 ame: full=hyperosmotic protein 21 short=shop21	1.18175e-26	ring-box protein	3.50149e-69
CUST_77548_PI422552764	contig01779	2.41595e-05	2.73675	down	1.08132	down	1.13988	down	1.36663	up	---NA---		---NA---
CUST_77549_PI422552764	contig01779	9.05955e-05	2.66773	down	1.17784	down	1.10817	up	1.65521	up	---NA---		---NA---
CUST_77550_PI422552764	contig01779	0.000451166	3.80672	down	1.34295	down	1.01097	down	2.82624	up	---NA---		---NA---
CUST_59826_PI422552764	contig01780	0.00198684	2.35593	up	2.77801	up	1.33305	up	2.23028	up	iojap_maize ame: full=protein iojap	2.73579e-07	iojap-related protein	3.63646e-31
CUST_71124_PI422552764	contig01786	5.40756e-05	2.3256	up	1.123	up	2.23648	up	1.47955	down	---NA---		---NA---
CUST_76749_PI422552764	contig01787	0.00263242	2.49067	down	1.30626	up	1.75742	down	1.0144	up	vatd_arath ame: full=v-type proton atpase subunit d short=v-atpase subunit d ame: full=vacuolar proton pump subunit d ame: full=vacuolar h(+)-atpase subunit d	4.62182e-39	h - or na -translocating f- v-type and a-type atpase (f-atpase) superfamily	7.7283e-99
CUST_70315_PI422552764	contig01788	7.09406e-07	2.01282	down	2.56837	up	1.0221	down	1.86594	up	---NA---		---NA---
CUST_70316_PI422552764	contig01788	2.21567e-07	2.19501	down	2.40845	up	1.0864	down	1.62728	up	---NA---		---NA---
CUST_70317_PI422552764	contig01788	5.51221e-06	2.14535	down	2.26483	up	1.08269	up	1.86409	up	---NA---		---NA---
CUST_70367_PI422552764	contig01789	0.000227285	7.46113	up	4.14219	up	4.80025	up	2.83181	up	---NA---		---NA---
CUST_24596_PI422552764	contig01791	0.000863102	3.49503	up	1.43872	down	1.87776	up	2.00319	down	---NA---		---NA---
CUST_24597_PI422552764	contig01791	8.24859e-05	4.98971	up	2.10457	down	1.91061	up	2.32362	down	---NA---		---NA---
CUST_75190_PI422552764	contig01792	2.67863e-07	2.23304	down	1.36053	up	1.71267	down	2.55502	up	---NA---		---NA---
CUST_75191_PI422552764	contig01792	1.65217e-06	2.02372	down	1.08935	up	1.55514	down	1.76061	up	---NA---		---NA---
CUST_73702_PI422552764	contig01793	0.000258649	5.12183	up	1.02275	down	2.55734	up	1.75941	down	u513_xentr ame: full=transmembrane protein 205	6.06053e-11	seed maturation protein expressed	2.02862e-55
CUST_73703_PI422552764	contig01793	6.05259e-07	4.94622	up	2.16134	down	1.31067	up	2.6818	down	u513_xentr ame: full=transmembrane protein 205	6.06053e-11	seed maturation protein expressed	2.02862e-55
CUST_73704_PI422552764	contig01793	1.97686e-07	4.12059	up	1.43515	down	1.49691	up	1.68779	down	u513_xentr ame: full=transmembrane protein 205	6.06053e-11	seed maturation protein expressed	2.02862e-55
CUST_62269_PI422552764	contig01797	0.000674995	1.07939	up	2.61218	down	1.22815	up	1.57772	down	---NA---		hypothetical protein NEMVEDRAFT_v1g223105 [Nematostella vectensis]	3.27601e-07
CUST_62270_PI422552764	contig01797	0.0022277	1.01056	down	2.18808	down	1.36028	up	1.58083	down	---NA---		hypothetical protein NEMVEDRAFT_v1g223105 [Nematostella vectensis]	3.27601e-07
CUST_74246_PI422552764	contig01798	0.00280081	2.44668	up	1.85438	down	1.79071	up	2.46366	down	---NA---		---NA---
CUST_46998_PI422552764	contig01801	0.000472171	1.37981	up	2.2467	up	1.61041	up	1.72807	up	---NA---		---NA---
CUST_60050_PI422552764	contig01802	5.54784e-08	2.98219	up	1.33177	down	1.20679	up	1.4035	down	---NA---		---NA---
CUST_78556_PI422552764	contig01803	0.00187069	1.93237	down	2.36708	up	1.25639	up	2.02902	up	syfb_phatr ame: full=phenylalanyl-trna synthetase beta chloroplastic ame: full=phenylalanine--trna ligase beta chain short=	1.27611e-68	replication helicase subunit	0
CUST_78557_PI422552764	contig01803	0.00378631	1.85036	down	2.20481	up	1.33559	up	2.19851	up	syfb_phatr ame: full=phenylalanyl-trna synthetase beta chloroplastic ame: full=phenylalanine--trna ligase beta chain short=	1.27611e-68	replication helicase subunit	0
CUST_78558_PI422552764	contig01803	0.0023134	1.93952	down	2.22949	up	1.30879	up	2.13217	up	syfb_phatr ame: full=phenylalanyl-trna synthetase beta chloroplastic ame: full=phenylalanine--trna ligase beta chain short=	1.27611e-68	replication helicase subunit	0
CUST_54838_PI422552764	contig01804	0.00295302	3.26501	up	2.41147	up	1.36187	down	2.50358	up	---NA---		---NA---
CUST_66679_PI422552764	contig01805	0.000207037	3.57953	up	5.13352	down	1.169	up	1.40089	up	---NA---		---NA---
CUST_66680_PI422552764	contig01805	0.000231782	3.11098	up	2.63382	down	1.0775	up	1.28272	up	---NA---		---NA---
CUST_66681_PI422552764	contig01805	0.000342792	3.36504	up	4.25094	down	1.348	up	1.63194	up	---NA---		---NA---
CUST_58577_PI422552764	contig01807	0.000464956	1.82209	up	1.76871	up	3.03443	up	2.96381	up	---NA---		---NA---
CUST_58578_PI422552764	contig01807	0.00231496	3.13088	up	2.43596	up	3.33135	up	3.75173	up	---NA---		---NA---
CUST_31154_PI422552764	contig01808	0.00018825	2.22976	up	3.65173	down	1.1431	down	1.05465	up	---NA---		---NA---
CUST_31155_PI422552764	contig01808	0.000179245	2.23204	up	3.64602	down	1.13102	down	1.06411	up	---NA---		---NA---
CUST_31156_PI422552764	contig01808	0.000152053	2.29477	up	3.70987	down	1.06336	down	1.13965	up	---NA---		---NA---
CUST_57944_PI422552764	contig01810	0.00291849	1.77375	up	2.72191	up	1.39151	up	1.89489	up	---NA---		---NA---
CUST_57945_PI422552764	contig01810	0.00305009	1.8348	up	3.09809	up	1.46279	up	1.8313	up	---NA---		---NA---
CUST_56353_PI422552764	contig01811	6.59797e-07	5.71593	down	1.5932	up	2.3526	down	1.38367	up	---NA---		---NA---
CUST_56354_PI422552764	contig01811	2.18199e-10	10.9586	down	1.77055	up	2.05121	down	1.25262	up	---NA---		---NA---
CUST_56355_PI422552764	contig01811	2.13369e-10	10.3804	down	1.64746	up	2.01598	down	1.32181	up	---NA---		---NA---
CUST_76024_PI422552764	contig01814	7.6086e-09	5.58636	down	1.28723	up	2.82879	down	1.22291	up	dur3_yeast ame: full=urea active transporter	2.21379e-37	urea high-affinity symporter	8.705e-123
CUST_76025_PI422552764	contig01814	6.7218e-07	3.89798	down	1.28362	up	2.57823	down	1.29825	up	dur3_yeast ame: full=urea active transporter	2.21379e-37	urea high-affinity symporter	8.705e-123
CUST_76026_PI422552764	contig01814	2.52576e-08	4.85267	down	1.19241	up	2.87675	down	1.24812	up	dur3_yeast ame: full=urea active transporter	2.21379e-37	urea high-affinity symporter	8.705e-123
CUST_66758_PI422552764	contig01817	6.05419e-05	2.899	down	1.09621	down	1.18655	down	1.20984	down	---NA---		n a	2.52432e-71
CUST_66759_PI422552764	contig01817	0.000117544	3.36374	down	1.17772	down	1.59689	down	1.15006	down	---NA---		n a	2.52432e-71
CUST_77911_PI422552764	contig01820	0.000154881	1.63798	up	6.7258	down	1.36724	down	1.66773	down	---NA---		---NA---
CUST_77912_PI422552764	contig01820	1.37639e-05	1.4027	up	5.33715	down	1.60594	down	1.58345	down	---NA---		---NA---
CUST_60091_PI422552764	contig01821	0.000957842	6.14005	up	1.28123	up	5.58749	up	1.8479	up	---NA---		---NA---
CUST_60092_PI422552764	contig01821	0.00331108	5.53706	up	2.31902	up	5.2778	up	1.6583	up	---NA---		---NA---
CUST_60093_PI422552764	contig01821	0.000259776	5.72634	up	1.98591	up	4.96943	up	1.33732	up	---NA---		---NA---
CUST_52900_PI422552764	contig01822	1.44603e-05	3.91139	up	1.6062	up	2.21499	up	1.43612	up	nbp35_yarli ame: full=cytosolic fe-s cluster assembly factor nbp35 ame: full=nucleotide-binding protein 35	3.84879e-08	nucleotide-binding protein 1	5.59053e-33
CUST_52901_PI422552764	contig01822	6.04462e-07	4.3789	up	1.53512	up	2.28766	up	1.35668	up	nbp35_yarli ame: full=cytosolic fe-s cluster assembly factor nbp35 ame: full=nucleotide-binding protein 35	3.84879e-08	nucleotide-binding protein 1	5.59053e-33
CUST_52902_PI422552764	contig01822	8.13121e-07	3.49285	up	1.47326	up	2.07097	up	1.28581	up	nbp35_yarli ame: full=cytosolic fe-s cluster assembly factor nbp35 ame: full=nucleotide-binding protein 35	3.84879e-08	nucleotide-binding protein 1	5.59053e-33
CUST_66373_PI422552764	contig01823	6.58094e-06	1.01972	up	3.05412	up	1.13324	up	2.07972	up	utp10_asptn ame: full=u3 small nucleolar rna-associated protein 10	4.67844e-08	loc100145567 protein	1.56154e-25
CUST_66374_PI422552764	contig01823	2.19542e-05	1.02756	down	3.17268	up	1.13327	up	2.27233	up	utp10_asptn ame: full=u3 small nucleolar rna-associated protein 10	4.67844e-08	loc100145567 protein	1.56154e-25
CUST_66375_PI422552764	contig01823	3.84593e-08	1.30154	down	2.72939	up	1.20685	up	2.10155	up	utp10_asptn ame: full=u3 small nucleolar rna-associated protein 10	4.67844e-08	loc100145567 protein	1.56154e-25
CUST_43285_PI422552764	contig01824	2.22736e-08	1.41244	up	6.15948	up	1.16243	down	7.18162	up	---NA---		---NA---
CUST_43286_PI422552764	contig01824	7.99066e-07	1.61136	up	6.47958	up	1.3407	up	7.17312	up	---NA---		---NA---
CUST_43287_PI422552764	contig01824	2.29928e-05	2.80933	up	8.06791	up	1.57681	up	6.6066	up	---NA---		---NA---
CUST_45079_PI422552764	contig01827	0.00268141	3.12591	up	1.87599	up	1.32359	up	1.3316	up	---NA---		---NA---
CUST_78145_PI422552764	contig01830	0.000211149	2.37275	up	1.82929	up	2.14862	up	1.68781	up	mcfb_dicdi ame: full=mitochondrial substrate carrier family protein b	1.32084e-15	mitochondrial energy transfer protein	6.3945e-123
CUST_78146_PI422552764	contig01830	4.8114e-06	3.28187	up	1.626	up	1.83359	up	1.67242	up	mcfb_dicdi ame: full=mitochondrial substrate carrier family protein b	1.32084e-15	mitochondrial energy transfer protein	6.3945e-123
CUST_78147_PI422552764	contig01830	0.000375086	2.82825	up	1.54906	up	1.89659	up	1.78208	up	mcfb_dicdi ame: full=mitochondrial substrate carrier family protein b	1.32084e-15	mitochondrial energy transfer protein	6.3945e-123
CUST_74890_PI422552764	contig01831	3.12512e-05	1.13105	up	2.12907	down	1.24077	down	1.436	down	---NA---		---NA---
CUST_74891_PI422552764	contig01831	4.84732e-06	1.09143	up	2.12594	down	1.07508	down	1.22779	down	---NA---		---NA---
CUST_68248_PI422552764	contig01832	9.49439e-09	1.82071	up	2.90626	down	1.35808	up	2.80191	down	ttll9_rat ame: full=probable tubulin polyglutamylase ttll9 ame: full=tubulin--tyrosine ligase-like protein 9	2.66477e-68	tubulin-tyrosine ligase family	1.5045e-125
CUST_68249_PI422552764	contig01832	1.84602e-09	1.65622	up	3.18108	down	1.31102	up	3.13889	down	ttll9_rat ame: full=probable tubulin polyglutamylase ttll9 ame: full=tubulin--tyrosine ligase-like protein 9	2.66477e-68	tubulin-tyrosine ligase family	1.5045e-125
CUST_68250_PI422552764	contig01832	3.8162e-09	1.6488	up	3.36001	down	1.3137	up	2.87388	down	ttll9_rat ame: full=probable tubulin polyglutamylase ttll9 ame: full=tubulin--tyrosine ligase-like protein 9	2.66477e-68	tubulin-tyrosine ligase family	1.5045e-125
CUST_72609_PI422552764	contig01833	2.15103e-08	1.52943	up	2.21905	down	1.39085	up	1.67684	down	park7_danre ame: full=protein dj-1 short=zdj-1 ame: full=parkinson disease protein 7 homolog	2.30772e-09	4-methyl-5(b-hydroxyethyl)-thiazole monophosphate biosynthesis enzyme	4.22512e-44
CUST_64012_PI422552764	contig01834	0.000143147	1.55776	up	2.71103	down	1.30676	down	1.48541	down	---NA---		---NA---
CUST_64013_PI422552764	contig01834	2.12243e-05	1.71118	up	3.15507	down	1.29705	down	1.51485	down	---NA---		---NA---
CUST_64014_PI422552764	contig01834	0.000703412	2.83804	up	1.89519	down	1.12549	down	1.72913	down	---NA---		---NA---
CUST_29325_PI422552764	contig01838	0.00364039	2.49023	down	2.51493	down	2.43045	down	1.77114	down	---NA---		---NA---
CUST_898_PI422552764	contig01839	0.00334922	4.0557	down	2.02237	down	2.55735	down	1.45344	down	---NA---		---NA---
CUST_899_PI422552764	contig01839	0.00345655	4.55815	down	1.98341	down	2.57251	down	1.52822	down	---NA---		---NA---
CUST_71239_PI422552764	contig01840	0.000610239	3.29375	down	2.03188	down	2.05277	down	1.13026	down	---NA---		heparan sulfate sulfotransferase	2.00811e-85
CUST_71240_PI422552764	contig01840	0.00156372	3.12121	down	1.79592	down	1.98102	down	1.01975	down	---NA---		heparan sulfate sulfotransferase	2.00811e-85
CUST_71241_PI422552764	contig01840	6.97645e-05	3.95765	down	2.09883	down	2.62633	down	1.4364	down	---NA---		heparan sulfate sulfotransferase	2.00811e-85
CUST_66733_PI422552764	contig01841	0.000745346	1.53856	up	2.80286	up	1.14526	up	3.43504	up	algg_pseae ame: full=poly(beta-d-mannuronate) c5 epimerase flags: precursor	3.78726e-13	mannuronan c-5-epimerase	1.37873e-85
CUST_66735_PI422552764	contig01841	0.00161027	1.31352	up	1.96151	up	1.11153	up	2.92768	up	algg_pseae ame: full=poly(beta-d-mannuronate) c5 epimerase flags: precursor	3.78726e-13	mannuronan c-5-epimerase	1.37873e-85
CUST_49138_PI422552764	contig01842	5.78503e-07	6.47089	down	1.42324	up	1.74542	down	1.78648	up	---NA---		mannuronan c-5-epimerase	2.39642e-55
CUST_49139_PI422552764	contig01842	1.29619e-06	6.02376	down	1.37162	up	1.79157	down	1.8835	up	---NA---		mannuronan c-5-epimerase	2.39642e-55
CUST_49140_PI422552764	contig01842	1.84318e-06	5.38109	down	1.33644	up	1.59181	down	1.85304	up	---NA---		mannuronan c-5-epimerase	2.39642e-55
CUST_66874_PI422552764	contig01843	0.000179995	11.6264	up	3.59813	up	6.54207	up	2.96005	up	---NA---		---NA---
CUST_66875_PI422552764	contig01843	0.00109792	3.04004	up	1.11456	up	1.02372	up	1.40202	up	---NA---		---NA---
CUST_53371_PI422552764	contig01844	0.000150241	2.25419	up	1.21539	down	1.06821	down	1.25937	down	---NA---		---NA---
CUST_53372_PI422552764	contig01844	6.04921e-05	2.54467	up	1.36594	down	1.03838	up	1.12907	down	---NA---		---NA---
CUST_53373_PI422552764	contig01844	6.54667e-05	2.69404	up	1.27187	down	1.03516	up	1.17473	down	---NA---		---NA---
CUST_76168_PI422552764	contig01845	7.10183e-05	5.26318	up	1.01436	down	3.30635	up	1.07654	down	---NA---		---NA---
CUST_76169_PI422552764	contig01845	2.5285e-05	2.6514	up	1.46376	down	1.70794	up	1.43569	down	---NA---		---NA---
CUST_76170_PI422552764	contig01845	0.000142971	2.45821	up	1.00646	down	1.9585	up	1.44005	down	---NA---		---NA---
CUST_76663_PI422552764	contig01848	0.00299457	3.2731	down	1.29271	up	1.12345	down	1.24654	up	cox1_marpo ame: full=cytochrome c oxidase subunit 1 ame: full=cytochrome c oxidase polypeptide i	4.42323e-103	cytochrome oxidase subunit i	1.4622e-110
CUST_73516_PI422552764	contig01849	5.99831e-05	2.00464	up	1.7502	down	1.21961	down	1.00246	down	---NA---		---NA---
CUST_73517_PI422552764	contig01849	1.82132e-05	2.4577	up	1.93087	down	1.30138	down	1.04152	down	---NA---		---NA---
CUST_73518_PI422552764	contig01849	0.000222558	2.85687	up	1.69522	down	1.01062	down	1.35514	up	---NA---		---NA---
CUST_42539_PI422552764	contig01851	0.00234558	3.93878	down	1.28179	up	1.32005	down	1.23423	up	ai1m_yeast ame: full= cox1 oxi3 intron 1 protein	3.60772e-17	reverse transcriptase homolog	9.47679e-64
CUST_42540_PI422552764	contig01851	0.00305009	3.97885	down	1.25469	up	1.36284	down	1.19794	up	ai1m_yeast ame: full= cox1 oxi3 intron 1 protein	3.60772e-17	reverse transcriptase homolog	9.47679e-64
CUST_47698_PI422552764	contig01852	8.08081e-06	2.04275	up	1.04748	down	1.51187	up	1.40759	down	---NA---		---NA---
CUST_47699_PI422552764	contig01852	5.04739e-06	2.1935	up	1.07395	up	1.72132	up	1.26484	down	---NA---		---NA---
CUST_47700_PI422552764	contig01852	2.36933e-06	2.29953	up	1.02055	up	1.70145	up	1.29291	down	---NA---		---NA---
CUST_71182_PI422552764	contig01853	5.26798e-08	2.79564	up	1.04465	up	2.22071	up	1.007	down	hm13_mouse ame: full=minor histocompatibility antigen h13 ame: full=signal peptide peptidase ame: full=presenilin-like protein 3	1.84033e-18	aspartyl protease family	1.94237e-53
CUST_71183_PI422552764	contig01853	2.95583e-07	2.30919	up	1.51677	up	1.91639	up	1.36867	up	hm13_mouse ame: full=minor histocompatibility antigen h13 ame: full=signal peptide peptidase ame: full=presenilin-like protein 3	1.84033e-18	aspartyl protease family	1.94237e-53
CUST_71184_PI422552764	contig01853	6.65991e-08	2.37815	up	1.42104	up	1.64986	up	1.20026	up	hm13_mouse ame: full=minor histocompatibility antigen h13 ame: full=signal peptide peptidase ame: full=presenilin-like protein 3	1.84033e-18	aspartyl protease family	1.94237e-53
CUST_57400_PI422552764	contig01854	6.65037e-05	3.13953	up	1.21304	down	1.73227	up	1.08257	up	hm13_mouse ame: full=minor histocompatibility antigen h13 ame: full=signal peptide peptidase ame: full=presenilin-like protein 3	2.49029e-20	protein	9.30839e-84
CUST_57401_PI422552764	contig01854	2.00052e-06	3.23833	up	1.11969	up	1.68843	up	1.14737	up	hm13_mouse ame: full=minor histocompatibility antigen h13 ame: full=signal peptide peptidase ame: full=presenilin-like protein 3	2.49029e-20	protein	9.30839e-84
CUST_57402_PI422552764	contig01854	1.23713e-05	3.53395	up	1.05184	down	1.63181	up	1.19853	up	hm13_mouse ame: full=minor histocompatibility antigen h13 ame: full=signal peptide peptidase ame: full=presenilin-like protein 3	2.49029e-20	protein	9.30839e-84
CUST_49432_PI422552764	contig01855	7.18257e-06	2.25513	down	1.03422	up	1.27063	down	1.06473	down	---NA---		---NA---
CUST_49433_PI422552764	contig01855	1.29785e-06	2.326	down	1.00351	down	1.21299	down	1.00274	down	---NA---		---NA---
CUST_49434_PI422552764	contig01855	7.41007e-05	2.29576	down	1.11844	up	1.37708	down	1.05534	down	---NA---		---NA---
CUST_57508_PI422552764	contig01856	8.02652e-06	2.21898	up	1.74285	up	1.47705	up	1.42364	up	---NA---		dead box helicase	1.4702e-36
CUST_57509_PI422552764	contig01856	8.23888e-05	2.01943	up	1.64965	up	1.40893	up	1.37656	up	---NA---		dead box helicase	1.4702e-36
CUST_45487_PI422552764	contig01858	0.00254837	2.9361	up	1.01724	down	1.08662	down	1.13653	down	---NA---		---NA---
CUST_45488_PI422552764	contig01858	0.000814313	3.8807	up	1.6787	up	2.84137	up	2.14491	up	---NA---		---NA---
CUST_45489_PI422552764	contig01858	0.000523094	1.9258	up	1.3469	up	1.47146	up	2.07573	up	---NA---		---NA---
CUST_70606_PI422552764	contig01862	5.21447e-08	3.76972	up	1.39614	down	2.40394	up	1.33933	down	---NA---		---NA---
CUST_70607_PI422552764	contig01862	3.83804e-07	3.54616	up	1.42338	down	2.23378	up	1.29737	down	---NA---		---NA---
CUST_70608_PI422552764	contig01862	5.13853e-08	3.95406	up	1.41522	down	2.33235	up	1.33242	down	---NA---		---NA---
CUST_69323_PI422552764	contig01864	0.000958566	1.12073	up	2.36628	down	1.15077	down	1.36682	down	---NA---		---NA---
CUST_63992_PI422552764	contig01866	0.00280225	3.04144	up	4.84545	up	1.57429	up	2.5667	up	---NA---		---NA---
CUST_63993_PI422552764	contig01866	0.00140513	2.56157	up	4.71538	up	1.48841	up	2.51179	up	---NA---		---NA---
CUST_74866_PI422552764	contig01867	0.000253926	3.05805	up	1.09898	down	1.76491	up	1.03902	down	---NA---		2-hydroxy-3-oxopropionate reductase	1.55024e-11
CUST_74867_PI422552764	contig01867	0.00419865	2.78922	up	1.08854	down	1.95765	up	1.21096	up	---NA---		2-hydroxy-3-oxopropionate reductase	1.55024e-11
CUST_74868_PI422552764	contig01867	0.00120249	3.39956	up	1.20069	up	2.34031	up	1.34721	up	---NA---		2-hydroxy-3-oxopropionate reductase	1.55024e-11
CUST_76096_PI422552764	contig01869	1.80141e-05	2.3962	up	3.97217	down	1.77563	up	4.82444	down	---NA---		n a	7.46709e-13
CUST_72326_PI422552764	contig01870	0.0014114	3.13308	up	1.97006	up	1.89652	up	1.78805	up	---NA---		---NA---
CUST_72327_PI422552764	contig01870	0.000214792	3.65161	up	1.97276	up	2.01111	up	1.63896	up	---NA---		---NA---
CUST_54028_PI422552764	contig01871	0.00172746	4.9102	up	1.06938	up	1.50251	up	1.23629	down	---NA---		---NA---
CUST_54029_PI422552764	contig01871	4.92733e-05	2.03346	up	1.13686	down	1.11969	down	1.45505	down	---NA---		---NA---
CUST_54030_PI422552764	contig01871	0.00030442	2.64098	up	1.14418	up	1.27884	up	1.08922	down	---NA---		---NA---
CUST_60865_PI422552764	contig01872	0.00109967	2.09019	up	2.26183	up	1.85902	up	6.14133	up	ews_human ame: full=rna-binding protein ews ame: full=ews oncogene ame: full=ewing sarcoma breakpoint region 1 protein	1.53901e-16	protein	9.5609e-54
CUST_60866_PI422552764	contig01872	0.00126391	1.63491	up	1.89107	up	1.41111	up	4.95099	up	ews_human ame: full=rna-binding protein ews ame: full=ews oncogene ame: full=ewing sarcoma breakpoint region 1 protein	1.53901e-16	protein	9.5609e-54
CUST_60867_PI422552764	contig01872	0.000314602	1.63721	up	2.04972	up	1.88277	up	5.60643	up	ews_human ame: full=rna-binding protein ews ame: full=ews oncogene ame: full=ewing sarcoma breakpoint region 1 protein	1.53901e-16	protein	9.5609e-54
CUST_76607_PI422552764	contig01873	0.000706531	2.28255	down	1.61598	up	1.15188	up	1.50004	up	ycf42_porpu ame: full= peroxiredoxin ycf42 ame: full=thioredoxin reductase	6.54823e-71	peroxiredoxin ycf42	1.2887e-88
CUST_76608_PI422552764	contig01873	2.31334e-05	3.01291	down	1.72111	up	1.04922	down	1.39545	up	ycf42_porpu ame: full= peroxiredoxin ycf42 ame: full=thioredoxin reductase	6.54823e-71	peroxiredoxin ycf42	1.2887e-88
CUST_77638_PI422552764	contig01875	1.7058e-05	2.86179	up	1.13555	up	2.05113	up	1.33268	up	---NA---		conserved unknown protein [Ectocarpus siliculosus]	4.46883e-48
CUST_77639_PI422552764	contig01875	5.73922e-05	2.59586	up	1.1232	up	1.92399	up	1.23548	up	---NA---		conserved unknown protein [Ectocarpus siliculosus]	4.46883e-48
CUST_77640_PI422552764	contig01875	1.57257e-06	2.99269	up	1.06237	up	1.86683	up	1.14366	up	---NA---		conserved unknown protein [Ectocarpus siliculosus]	4.46883e-48
CUST_64952_PI422552764	contig01876	0.0023812	1.98082	down	2.67387	down	1.90798	down	6.06305	down	---NA---		---NA---
CUST_74965_PI422552764	contig01878	3.96217e-08	2.07895	up	1.04402	up	1.83079	up	1.24845	up	---NA---		---NA---
CUST_74966_PI422552764	contig01878	2.67404e-06	2.08548	up	1.04335	down	1.7796	up	1.08898	up	---NA---		---NA---
CUST_65851_PI422552764	contig01880	0.00147958	2.82196	up	1.53304	up	2.33828	up	1.73786	up	---NA---		---NA---
CUST_75751_PI422552764	contig01883	4.31481e-05	3.70386	up	2.00051	up	1.69151	up	1.69335	up	phot2_orysj ame: full=phototropin-2 ame: full=non-phototropic hypocotyl protein 1b short= 1b	7.88129e-24	aureochrome1-like protein	7.44946e-71
CUST_75752_PI422552764	contig01883	0.0023636	3.00051	up	1.42493	up	1.2747	up	1.1839	up	phot2_orysj ame: full=phototropin-2 ame: full=non-phototropic hypocotyl protein 1b short= 1b	7.88129e-24	aureochrome1-like protein	7.44946e-71
CUST_75753_PI422552764	contig01883	0.000507927	2.83889	up	1.75397	up	1.35806	up	1.44398	up	phot2_orysj ame: full=phototropin-2 ame: full=non-phototropic hypocotyl protein 1b short= 1b	7.88129e-24	aureochrome1-like protein	7.44946e-71
CUST_65533_PI422552764	contig01888	0.000166382	1.91149	up	3.34896	down	1.01955	down	2.00186	down	---NA---		---NA---
CUST_65534_PI422552764	contig01888	0.000485921	2.61156	up	2.22475	down	1.23081	up	1.55834	down	---NA---		---NA---
CUST_65535_PI422552764	contig01888	0.00053889	2.76792	up	1.98609	down	1.35968	up	1.46995	down	---NA---		---NA---
CUST_75842_PI422552764	contig01890	2.77714e-06	2.76869	down	2.38218	down	1.00341	up	1.07968	up	---NA---		---NA---
CUST_75843_PI422552764	contig01890	3.3853e-06	2.58673	down	2.60222	down	1.01708	up	1.2707	up	---NA---		---NA---
CUST_70851_PI422552764	contig01891	4.23708e-05	2.00566	down	1.18422	down	1.01018	up	1.51441	up	---NA---		---NA---
CUST_57559_PI422552764	contig01893	2.2902e-07	3.47714	down	1.21458	up	1.13851	down	1.02591	down	---NA---		---NA---
CUST_57560_PI422552764	contig01893	1.39013e-07	3.48277	down	1.39501	up	1.12733	down	1.07158	up	---NA---		---NA---
CUST_57561_PI422552764	contig01893	3.93146e-07	3.45225	down	1.18747	up	1.26018	down	1.11296	down	---NA---		---NA---
CUST_73966_PI422552764	contig01894	8.69733e-05	4.63159	down	1.45456	down	1.29385	down	1.42419	down	chlg_orysj ame: full=chlorophyll chloroplastic ame: full=polyprenyl transferase flags: precursor	1.92813e-121	chlorophyll synthetase	0
CUST_73967_PI422552764	contig01894	0.000145788	4.46866	down	1.38613	down	1.21809	down	1.36826	down	chlg_orysj ame: full=chlorophyll chloroplastic ame: full=polyprenyl transferase flags: precursor	1.92813e-121	chlorophyll synthetase	0
CUST_73968_PI422552764	contig01894	0.00279395	3.3081	down	1.35493	down	1.15901	down	1.1688	down	chlg_orysj ame: full=chlorophyll chloroplastic ame: full=polyprenyl transferase flags: precursor	1.92813e-121	chlorophyll synthetase	0
CUST_24813_PI422552764	contig01895	0.00104442	1.23492	up	2.12436	down	1.30935	up	1.23227	down	---NA---		---NA---
CUST_74668_PI422552764	contig01897	2.84911e-05	2.72531	up	1.09453	up	1.62328	up	1.36547	down	---NA---		hypothetical protein [Ectocarpus siliculosus]	2.94969e-15
CUST_74669_PI422552764	contig01897	4.59793e-05	2.77011	up	1.00182	up	1.53794	up	1.52982	down	---NA---		hypothetical protein [Ectocarpus siliculosus]	2.94969e-15
CUST_74670_PI422552764	contig01897	6.57696e-06	2.85578	up	1.10229	down	1.39624	up	1.45941	down	---NA---		hypothetical protein [Ectocarpus siliculosus]	2.94969e-15
CUST_69260_PI422552764	contig01898	0.00243335	1.06475	up	2.05995	up	1.54793	up	1.32525	up	u399_nemve ame: full=upf0399 protein v1g245966	2.98469e-33	testis intracellular mediator protein	1.03837e-87
CUST_38170_PI422552764	contig01900	1.31073e-08	3.47745	up	1.36685	down	1.3035	up	1.83071	down	---NA---		---NA---
CUST_38171_PI422552764	contig01900	3.37941e-07	2.85609	up	1.37001	down	1.13514	up	1.80775	down	---NA---		---NA---
CUST_38172_PI422552764	contig01900	1.13871e-07	2.84915	up	1.21873	down	1.20732	up	1.74146	down	---NA---		---NA---
CUST_77665_PI422552764	contig01903	6.29414e-06	4.59904	down	1.47005	up	1.28802	down	2.14925	up	rdpo_sceob ame: full=probable reverse transcriptase	7.42936e-31	reverse transcriptase	3.9822e-121
CUST_77666_PI422552764	contig01903	6.20401e-06	4.50004	down	1.5066	up	1.28093	down	2.16772	up	rdpo_sceob ame: full=probable reverse transcriptase	7.42936e-31	reverse transcriptase	3.9822e-121
CUST_77667_PI422552764	contig01903	3.48072e-05	4.41873	down	1.59207	up	1.16452	down	2.31664	up	rdpo_sceob ame: full=probable reverse transcriptase	7.42936e-31	reverse transcriptase	3.9822e-121
CUST_47800_PI422552764	contig01904	0.000266081	2.24178	up	1.47052	up	2.28666	up	1.06624	up	---NA---		---NA---
CUST_47801_PI422552764	contig01904	0.00159495	2.8718	up	1.27254	down	2.36121	up	1.05121	up	---NA---		---NA---
CUST_47802_PI422552764	contig01904	6.31168e-05	2.79817	up	1.02391	down	2.93891	up	1.55199	up	---NA---		---NA---
CUST_69078_PI422552764	contig01905	0.000713137	4.52786	down	1.69772	up	2.23941	down	1.86509	down	---NA---		expressed unknown protein [Ectocarpus siliculosus]	9.06502e-36
CUST_77674_PI422552764	contig01906	4.40544e-06	3.50458	down	1.29212	up	1.15201	down	1.82088	up	rdpo_sceob ame: full=probable reverse transcriptase	9.68425e-63	rna-directed dna polymerase	4.8149e-167
CUST_77675_PI422552764	contig01906	5.12686e-06	3.75877	down	1.27737	up	1.48095	down	1.64992	up	rdpo_sceob ame: full=probable reverse transcriptase	9.68425e-63	rna-directed dna polymerase	4.8149e-167
CUST_77676_PI422552764	contig01906	5.02447e-06	4.47858	down	1.73938	up	1.42442	down	1.78551	up	rdpo_sceob ame: full=probable reverse transcriptase	9.68425e-63	rna-directed dna polymerase	4.8149e-167
CUST_54130_PI422552764	contig01913	0.00112351	3.50786	down	1.49673	down	1.23027	up	1.28588	down	---NA---		PREDICTED: hypothetical protein LOC100503705, partial [Mus musculus]	7.50727e-07
CUST_54132_PI422552764	contig01913	0.000689706	2.17303	down	1.58112	up	1.23395	up	1.19763	up	---NA---		PREDICTED: hypothetical protein LOC100503705, partial [Mus musculus]	7.50727e-07
CUST_78571_PI422552764	contig01914	7.99847e-07	1.21724	down	8.18332	down	1.00347	up	2.89847	down	npc1_pig ame: full=niemann-pick c1 protein flags: precursor	9.99457e-24	patched domain-containing protein partial	3.19643e-90
CUST_78572_PI422552764	contig01914	0.00161295	1.33491	down	2.63159	down	1.02366	down	2.06607	down	npc1_pig ame: full=niemann-pick c1 protein flags: precursor	9.99457e-24	patched domain-containing protein partial	3.19643e-90
CUST_78573_PI422552764	contig01914	1.32186e-05	1.09934	down	18.0884	down	1.12361	up	2.61064	down	npc1_pig ame: full=niemann-pick c1 protein flags: precursor	9.99457e-24	patched domain-containing protein partial	3.19643e-90
CUST_44020_PI422552764	contig01915	4.57793e-08	6.4361	up	2.11422	down	2.41241	up	1.62622	down	---NA---		---NA---
CUST_44021_PI422552764	contig01915	2.87279e-06	8.80267	up	1.2391	down	3.06887	up	1.73109	down	---NA---		---NA---
CUST_44022_PI422552764	contig01915	2.33396e-07	7.13232	up	1.89193	down	2.49394	up	1.49498	down	---NA---		---NA---
CUST_65975_PI422552764	contig01919	0.00396207	2.83416	down	1.21206	up	1.08388	down	1.02851	up	---NA---		haloacid dehalogenase-like hydrolase	3.71417e-32
CUST_75806_PI422552764	contig01920	1.81181e-07	3.39065	down	1.47332	up	1.8203	down	1.02122	up	tpt2_braob ame: full=triose phosphate phosphate non-green chloroplastic short=ctpt flags: precursor	1.89188e-25	plastidic triose-phosphate phosphate translocator	1.23603e-81
CUST_75807_PI422552764	contig01920	1.11801e-07	3.33024	down	1.66059	up	1.93534	down	1.09858	up	tpt2_braob ame: full=triose phosphate phosphate non-green chloroplastic short=ctpt flags: precursor	1.89188e-25	plastidic triose-phosphate phosphate translocator	1.23603e-81
CUST_59380_PI422552764	contig01921	0.00371618	1.17694	down	2.23759	up	1.09307	up	1.38747	up	sytc_yeast ame: full=threonyl-trna cytoplasmic ame: full=threonine--trna ligase short=	5.01545e-30	threonine--trna ligase	4.45707e-50
CUST_77683_PI422552764	contig01923	1.96931e-07	4.2409	down	1.07298	down	1.34108	down	1.31228	down	dcup_cyap7 ame: full=uroporphyrinogen decarboxylase short=uro-d short=upd	2.6872e-105	uroporphyrinogen decarboxylase	4.0787e-174
CUST_77684_PI422552764	contig01923	1.2384e-06	3.96873	down	1.35535	down	1.30886	down	1.35888	down	dcup_cyap7 ame: full=uroporphyrinogen decarboxylase short=uro-d short=upd	2.6872e-105	uroporphyrinogen decarboxylase	4.0787e-174
CUST_77685_PI422552764	contig01923	9.8874e-05	3.07648	down	1.62587	down	1.21259	down	1.5078	down	dcup_cyap7 ame: full=uroporphyrinogen decarboxylase short=uro-d short=upd	2.6872e-105	uroporphyrinogen decarboxylase	4.0787e-174
CUST_70631_PI422552764	contig01925	0.00314891	3.52895	down	1.58348	up	1.19157	up	1.80393	up	psba_ectsi ame: full=photosystem q protein ame: full=32 kda thylakoid membrane protein ame: full=photosystem ii protein d1 flags: precursor	0	photosystem ii reaction centre protein d1 psba	0
CUST_70632_PI422552764	contig01925	0.00229677	3.94003	down	1.35271	up	1.16734	up	1.61091	up	psba_ectsi ame: full=photosystem q protein ame: full=32 kda thylakoid membrane protein ame: full=photosystem ii protein d1 flags: precursor	0	photosystem ii reaction centre protein d1 psba	0
CUST_70633_PI422552764	contig01926	0.00012949	2.80263	up	3.64812	up	1.79247	up	2.8027	up	---NA---		---NA---
CUST_70634_PI422552764	contig01926	1.0919e-05	2.13079	up	2.84604	up	1.71028	up	2.28906	up	---NA---		---NA---
CUST_64274_PI422552764	contig01927	0.000204694	2.74806	up	2.1382	up	1.56508	down	1.17425	down	---NA---		---NA---
CUST_64275_PI422552764	contig01927	0.000183987	2.08548	up	3.73966	up	1.26986	down	1.12335	up	---NA---		---NA---
CUST_24197_PI422552764	contig01928	3.88309e-05	5.48741	up	2.1873	up	4.8147	up	1.77899	up	---NA---		---NA---
CUST_75667_PI422552764	contig01929	0.000866749	5.8982	up	2.40155	up	1.0326	up	3.73959	up	---NA---		---NA---
CUST_75669_PI422552764	contig01929	1.84671e-06	9.23623	up	6.18586	up	3.97405	up	5.23558	up	---NA---		---NA---
CUST_56740_PI422552764	contig01931	2.13838e-09	3.24338	down	2.57537	up	1.56575	down	1.67583	up	---NA---		methyltransferase type 11	1.47075e-62
CUST_56741_PI422552764	contig01931	4.01668e-10	2.78564	down	2.46824	up	1.49755	down	1.79796	up	---NA---		methyltransferase type 11	1.47075e-62
CUST_56742_PI422552764	contig01931	2.46952e-10	2.86542	down	2.26253	up	1.474	down	1.74514	up	---NA---		methyltransferase type 11	1.47075e-62
CUST_53374_PI422552764	contig01933	0.00147907	1.63047	up	2.80642	up	2.1756	up	5.39654	up	---NA---		---NA---
CUST_53375_PI422552764	contig01933	0.00167991	1.64269	up	2.23968	up	2.34798	up	5.02344	up	---NA---		---NA---
CUST_53376_PI422552764	contig01933	0.00411913	1.06624	down	1.10774	up	1.77407	up	2.87932	up	---NA---		---NA---
CUST_68571_PI422552764	contig01940	0.00157184	2.53757	down	1.44514	down	1.88212	down	1.9079	down	---NA---		---NA---
CUST_5056_PI422552764	contig01941	9.2824e-08	8.55053	up	2.67456	up	2.68396	up	1.45647	up	---NA---		---NA---
CUST_5057_PI422552764	contig01941	1.30943e-05	15.8597	up	3.52733	up	4.96019	up	2.50057	up	---NA---		---NA---
CUST_5058_PI422552764	contig01941	1.11059e-05	7.34839	up	2.07702	up	2.31738	up	1.09465	up	---NA---		---NA---
CUST_57403_PI422552764	contig01942	0.00013029	6.31781	up	3.44603	up	1.55731	up	1.83073	up	---NA---		---NA---
CUST_57404_PI422552764	contig01942	1.03704e-06	10.181	up	1.79261	up	2.73565	up	2.29529	up	---NA---		---NA---
CUST_8402_PI422552764	contig01943	0.00112764	3.38272	up	1.30094	up	2.35446	up	1.82634	up	---NA---		---NA---
CUST_8403_PI422552764	contig01943	0.000379607	2.87324	up	1.1224	down	1.53079	up	1.45058	up	---NA---		---NA---
CUST_66151_PI422552764	contig01947	6.46983e-06	4.33641	down	1.42836	up	1.21581	up	1.11506	down	lguc_arath ame: full=probable lactoylglutathione chloroplast ame: full=glyoxalase i flags: precursor	1.87547e-33	conserved unknown protein [Ectocarpus siliculosus]	2.10457e-91
CUST_66152_PI422552764	contig01947	7.07995e-06	3.51715	down	1.65608	up	1.19084	up	1.15005	down	lguc_arath ame: full=probable lactoylglutathione chloroplast ame: full=glyoxalase i flags: precursor	1.87547e-33	conserved unknown protein [Ectocarpus siliculosus]	2.10457e-91
CUST_66153_PI422552764	contig01947	0.000302304	5.38635	down	1.67817	up	1.36462	down	1.87701	down	lguc_arath ame: full=probable lactoylglutathione chloroplast ame: full=glyoxalase i flags: precursor	1.87547e-33	conserved unknown protein [Ectocarpus siliculosus]	2.10457e-91
CUST_12767_PI422552764	contig01957	0.000279624	1.1226	up	2.19401	down	1.23713	down	1.58226	down	---NA---		---NA---
CUST_19691_PI422552764	contig01960	4.50516e-10	16.5114	down	1.17395	up	1.98139	down	1.0383	up	---NA---		---NA---
CUST_19692_PI422552764	contig01960	9.05651e-09	16.823	down	1.23497	up	1.50441	down	1.12401	up	---NA---		---NA---
CUST_19693_PI422552764	contig01960	3.07851e-08	20.0911	down	1.12931	up	2.00919	down	1.06053	up	---NA---		---NA---
CUST_67456_PI422552764	contig01961	1.52668e-07	8.10772	down	1.36565	up	1.53869	up	1.46459	up	---NA---		---NA---
CUST_67457_PI422552764	contig01961	0.000348485	2.39024	down	1.00272	up	1.21456	up	1.1123	up	---NA---		---NA---
CUST_67458_PI422552764	contig01961	1.6881e-06	6.65513	down	1.53422	up	1.72173	up	1.70101	up	---NA---		---NA---
CUST_62899_PI422552764	contig01962	6.44691e-05	1.42571	up	4.76995	down	1.03361	down	1.46674	down	---NA---		---NA---
CUST_62900_PI422552764	contig01962	0.00200061	1.61614	up	2.2528	down	1.19481	down	1.04905	down	---NA---		---NA---
CUST_62901_PI422552764	contig01962	5.70601e-05	1.0552	up	5.89895	down	2.1611	down	1.94339	down	---NA---		---NA---
CUST_47416_PI422552764	contig01963	0.000189641	1.56381	up	3.08088	down	1.22201	up	2.33056	down	---NA---		---NA---
CUST_47417_PI422552764	contig01963	0.000315211	1.4177	up	2.96507	down	1.54271	up	2.03452	down	---NA---		---NA---
CUST_52708_PI422552764	contig01966	0.000851113	1.76341	up	2.34655	down	1.04329	down	1.38186	down	---NA---		---NA---
CUST_52709_PI422552764	contig01966	0.000512407	1.88984	up	2.31798	down	1.02707	up	1.19757	down	---NA---		---NA---
CUST_71349_PI422552764	contig01969	0.000396296	3.16451	up	1.14281	down	1.53857	up	1.70186	down	---NA---		---NA---
CUST_54364_PI422552764	contig01971	1.83962e-05	6.27743	down	1.29072	down	1.55403	down	1.03632	down	---NA---		---NA---
CUST_54365_PI422552764	contig01971	2.98204e-05	5.35366	down	1.3479	down	1.94601	down	1.07563	down	---NA---		---NA---
CUST_54366_PI422552764	contig01971	8.24488e-05	6.46403	down	1.82804	down	1.88522	down	1.10223	down	---NA---		---NA---
CUST_53964_PI422552764	contig01973	0.00109349	1.56986	down	3.03266	down	2.21881	down	3.2946	down	---NA---		---NA---
CUST_43489_PI422552764	contig01974	1.35085e-07	2.01363	up	4.28861	down	1.1683	up	2.48223	down	---NA---		---NA---
CUST_43490_PI422552764	contig01974	3.50531e-06	1.49038	up	4.31523	down	1.03514	up	2.87571	down	---NA---		---NA---
CUST_43491_PI422552764	contig01974	1.05648e-05	1.94982	up	3.50043	down	1.32585	up	2.04073	down	---NA---		---NA---
CUST_58042_PI422552764	contig01975	1.74342e-05	3.19787	up	5.19749	down	1.66614	up	2.43277	down	---NA---		respiratory burst oxidase homolog protein	1.74227e-08
CUST_58043_PI422552764	contig01975	6.10406e-06	2.55974	up	3.57875	down	1.40207	up	2.66768	down	---NA---		respiratory burst oxidase homolog protein	1.74227e-08
CUST_58044_PI422552764	contig01975	4.53423e-06	2.648	up	3.31852	down	1.58824	up	2.66529	down	---NA---		respiratory burst oxidase homolog protein	1.74227e-08
CUST_74518_PI422552764	contig01976	1.26969e-05	1.66919	down	2.64873	down	1.03509	down	1.72205	down	---NA---		---NA---
CUST_74519_PI422552764	contig01976	1.93254e-05	1.99393	down	2.4559	down	1.26034	down	2.05688	down	---NA---		---NA---
CUST_74520_PI422552764	contig01976	5.12649e-05	1.9574	down	2.82749	down	1.33404	down	2.06499	down	---NA---		---NA---
CUST_69079_PI422552764	contig01977	2.82664e-06	1.50523	up	3.89262	down	1.01411	down	2.22455	down	nox5_human ame: full=nadph oxidase 5	1.01665e-09	respiratory burst oxidase homolog protein	8.5315e-114
CUST_47236_PI422552764	contig01979	0.00304059	2.84773	up	1.00024	up	1.39093	up	1.2574	up	---NA---		---NA---
CUST_56970_PI422552764	contig01981	6.96918e-05	1.76208	up	4.54661	up	2.1465	up	3.31702	up	---NA---		---NA---
CUST_67561_PI422552764	contig01985	6.20313e-08	17.8234	down	1.95024	down	1.36731	down	1.20676	down	---NA---		---NA---
CUST_67562_PI422552764	contig01985	1.60233e-08	20.671	down	1.4368	down	1.37664	down	1.2176	down	---NA---		---NA---
CUST_67563_PI422552764	contig01985	1.84602e-09	13.671	down	1.30123	down	1.30684	down	1.16405	down	---NA---		---NA---
CUST_67735_PI422552764	contig01986	0.00239056	4.27949	down	1.16318	down	1.49321	down	1.2329	down	---NA---		conserved unknown protein [Ectocarpus siliculosus]	6.3247e-105
CUST_67736_PI422552764	contig01986	0.00262462	4.515	down	1.05546	up	1.68845	down	1.47359	down	---NA---		conserved unknown protein [Ectocarpus siliculosus]	6.3247e-105
CUST_67737_PI422552764	contig01986	5.67282e-05	5.81938	down	1.03169	down	1.77421	down	1.34778	down	---NA---		conserved unknown protein [Ectocarpus siliculosus]	6.3247e-105
CUST_35161_PI422552764	contig01988	0.00252257	3.68616	up	2.18766	up	3.34587	up	3.1992	up	---NA---		---NA---
CUST_62167_PI422552764	contig01989	0.000296979	1.22929	down	2.95295	up	1.02409	down	2.72845	up	---NA---		---NA---
CUST_62168_PI422552764	contig01989	0.000412195	1.25512	down	2.10077	up	1.1032	down	2.77619	up	---NA---		---NA---
CUST_62169_PI422552764	contig01989	0.000368376	1.97978	down	1.72235	up	1.5614	up	2.49744	up	---NA---		---NA---
CUST_53893_PI422552764	contig02001	0.00116401	2.81497	up	1.0318	up	1.98578	up	1.16433	up	rbm42_danre ame: full=rna-binding protein 42 ame: full=rna-binding motif protein 42	2.59379e-31	temporarily assigned gene name family member (tag-262)	2.12845e-54
CUST_53894_PI422552764	contig02001	0.000699192	2.88961	up	1.08777	down	1.95564	up	1.1361	up	rbm42_danre ame: full=rna-binding protein 42 ame: full=rna-binding motif protein 42	2.59379e-31	temporarily assigned gene name family member (tag-262)	2.12845e-54
CUST_53895_PI422552764	contig02001	0.000321117	3.03837	up	1.08699	down	1.92181	up	1.0888	up	rbm42_danre ame: full=rna-binding protein 42 ame: full=rna-binding motif protein 42	2.59379e-31	temporarily assigned gene name family member (tag-262)	2.12845e-54
CUST_77377_PI422552764	contig02002	4.76647e-05	3.15183	down	1.12707	up	1.54594	down	1.06597	up	---NA---		tic 20 plastid import	4.4176e-122
CUST_77378_PI422552764	contig02002	1.1119e-09	5.41784	down	1.60349	up	2.12109	down	1.32387	up	---NA---		tic 20 plastid import	4.4176e-122
CUST_77379_PI422552764	contig02002	2.14767e-08	4.49765	down	1.48258	up	1.89266	down	1.37153	up	---NA---		tic 20 plastid import	4.4176e-122
CUST_73738_PI422552764	contig02003	6.22717e-09	3.48311	up	3.47753	down	1.5511	up	1.93015	down	---NA---		---NA---
CUST_73739_PI422552764	contig02003	6.25062e-08	3.20556	up	3.51518	down	1.59137	up	1.70683	down	---NA---		---NA---
CUST_73740_PI422552764	contig02003	3.25483e-07	3.24872	up	2.85523	down	1.48674	up	1.67903	down	---NA---		---NA---
CUST_56230_PI422552764	contig02004	6.93416e-09	1.41885	up	2.60788	down	1.82896	up	2.91183	down	---NA---		---NA---
CUST_56231_PI422552764	contig02004	3.99112e-09	1.02979	up	4.66385	down	1.41835	up	3.99366	down	---NA---		---NA---
CUST_56232_PI422552764	contig02004	2.56033e-09	1.29137	up	3.07389	down	1.97602	up	3.02783	down	---NA---		---NA---
CUST_10247_PI422552764	contig02006	0.00139436	4.23623	down	1.02146	down	2.05894	down	1.02881	down	---NA---		---NA---
CUST_10248_PI422552764	contig02006	0.000589049	3.55002	down	1.10919	up	1.81769	down	1.07927	up	---NA---		---NA---
CUST_10249_PI422552764	contig02006	0.0013681	6.21803	down	1.53685	down	3.21257	down	1.45269	down	---NA---		---NA---
CUST_74767_PI422552764	contig02010	3.39915e-07	1.11872	up	4.77375	down	1.71125	up	2.16459	down	---NA---		---NA---
CUST_74768_PI422552764	contig02010	5.50125e-06	1.16079	up	5.36891	down	1.90028	up	2.01864	down	---NA---		---NA---
CUST_74769_PI422552764	contig02010	1.15395e-05	1.35868	down	3.34596	down	1.3025	up	1.85774	down	---NA---		---NA---
CUST_74593_PI422552764	contig02011	0.00146483	2.56281	down	1.40121	up	1.69922	down	1.13462	down	g3p_phyin ame: full=glyceraldehyde-3-phosphate dehydrogenase short=gapdh	4.55904e-145	glyceraldehyde 3-phosphate dehydrogenase	0
CUST_74594_PI422552764	contig02011	0.00142749	2.52825	down	1.47481	up	1.65245	down	1.06907	down	g3p_phyin ame: full=glyceraldehyde-3-phosphate dehydrogenase short=gapdh	4.55904e-145	glyceraldehyde 3-phosphate dehydrogenase	0
CUST_74595_PI422552764	contig02011	0.000642743	2.59957	down	1.57579	up	1.6074	down	1.00742	up	g3p_phyin ame: full=glyceraldehyde-3-phosphate dehydrogenase short=gapdh	4.55904e-145	glyceraldehyde 3-phosphate dehydrogenase	0
CUST_63025_PI422552764	contig02013	0.00131853	2.53978	down	1.28768	down	1.81265	down	1.10839	down	---NA---		---NA---
CUST_63026_PI422552764	contig02013	0.00129401	2.58719	down	1.32106	down	1.8328	down	1.16228	down	---NA---		---NA---
CUST_63027_PI422552764	contig02013	0.000761213	2.52275	down	1.26827	down	1.74488	down	1.09336	down	---NA---		---NA---
CUST_75108_PI422552764	contig02017	0.00318432	2.08568	up	1.43674	down	1.57523	up	6.39299	down	---NA---		---NA---
CUST_27282_PI422552764	contig02020	0.000338293	1.36608	up	2.33054	up	1.21454	down	1.02635	down	---NA---		---NA---
CUST_69637_PI422552764	contig02029	0.000202414	2.29013	up	1.73391	down	1.84585	up	1.07624	down	---NA---		---NA---
CUST_69638_PI422552764	contig02029	0.000288182	6.33398	up	1.01645	down	2.57993	up	1.42985	up	---NA---		---NA---
CUST_69639_PI422552764	contig02029	3.48735e-09	4.11218	up	1.19896	down	2.09683	up	1.53513	down	---NA---		---NA---
CUST_77812_PI422552764	contig02030	8.46985e-09	3.53204	down	2.03887	up	1.75109	down	1.71633	up	g3p_phyin ame: full=glyceraldehyde-3-phosphate dehydrogenase short=gapdh	3.33098e-143	triosephosphate isomerase glyceraldehyde-3-phosphate	2.2257e-167
CUST_77813_PI422552764	contig02030	1.82283e-07	3.74579	down	1.80794	up	1.87414	down	1.59456	up	g3p_phyin ame: full=glyceraldehyde-3-phosphate dehydrogenase short=gapdh	3.33098e-143	triosephosphate isomerase glyceraldehyde-3-phosphate	2.2257e-167
CUST_77814_PI422552764	contig02030	2.30263e-08	4.32259	down	1.92041	up	2.08608	down	1.51113	up	g3p_phyin ame: full=glyceraldehyde-3-phosphate dehydrogenase short=gapdh	3.33098e-143	triosephosphate isomerase glyceraldehyde-3-phosphate	2.2257e-167
CUST_76447_PI422552764	contig02031	4.86075e-05	4.28023	down	4.70733	down	1.47608	down	3.37127	down	---NA---		conserved unknown protein [Ectocarpus siliculosus]	1.36928e-73
CUST_76448_PI422552764	contig02031	3.21587e-06	4.18565	down	3.28448	down	1.5052	down	2.83579	down	---NA---		conserved unknown protein [Ectocarpus siliculosus]	1.36928e-73
CUST_76449_PI422552764	contig02031	3.68186e-05	4.28519	down	3.36706	down	1.42455	down	2.8502	down	---NA---		conserved unknown protein [Ectocarpus siliculosus]	1.36928e-73
CUST_69787_PI422552764	contig02033	3.95024e-06	2.39072	up	1.65141	down	2.22239	up	1.29385	down	---NA---		---NA---
CUST_69789_PI422552764	contig02033	2.06258e-05	2.16125	up	1.23082	down	1.77506	up	1.37136	down	---NA---		---NA---
CUST_75706_PI422552764	contig02036	1.07159e-08	2.54142	down	2.3599	up	1.49309	down	3.12821	up	---NA---		---NA---
CUST_75707_PI422552764	contig02036	4.28019e-06	2.56324	down	1.7199	up	1.73189	down	2.79234	up	---NA---		---NA---
CUST_75708_PI422552764	contig02036	1.64651e-06	2.07389	down	2.19978	up	1.23496	down	3.38106	up	---NA---		---NA---
CUST_28400_PI422552764	contig02038	0.00046323	5.38222	up	2.06074	up	2.69644	up	2.96954	up	---NA---		---NA---
CUST_28401_PI422552764	contig02038	0.00420157	3.9077	up	2.09916	up	3.97552	up	2.61898	up	---NA---		---NA---
CUST_28402_PI422552764	contig02038	0.000334834	5.71322	up	4.07098	up	2.6894	up	3.098	up	---NA---		---NA---
CUST_77075_PI422552764	contig02039	0.00331914	1.3265	down	1.75442	up	1.78022	up	2.03831	up	nop5b_arath ame: full=probable nucleolar protein 5-2 ame: full=nucleolar protein 58-2 ame: full=mar-binding nop56 58 homolog 2	3.34097e-128	nucleolar protein expressed	0
CUST_77076_PI422552764	contig02039	0.0041233	1.26777	down	1.93706	up	1.72311	up	2.02438	up	nop5b_arath ame: full=probable nucleolar protein 5-2 ame: full=nucleolar protein 58-2 ame: full=mar-binding nop56 58 homolog 2	3.34097e-128	nucleolar protein expressed	0
CUST_65167_PI422552764	contig02040	0.000193073	2.3228	down	2.33111	down	1.18503	down	1.42493	down	---NA---		---NA---
CUST_65168_PI422552764	contig02040	0.000204046	2.07989	down	1.50996	down	1.26195	down	1.32402	down	---NA---		---NA---
CUST_65169_PI422552764	contig02040	7.41007e-05	2.13688	down	2.52574	down	1.16953	down	1.37438	down	---NA---		---NA---
CUST_75592_PI422552764	contig02047	4.84932e-07	3.92928	down	1.04766	down	1.84101	down	1.33973	down	---NA---		tha4 hcf106 protein	3.79262e-27
CUST_75593_PI422552764	contig02047	2.01616e-06	3.51261	down	1.24158	down	1.56898	down	1.61401	down	---NA---		tha4 hcf106 protein	3.79262e-27
CUST_75594_PI422552764	contig02047	4.40213e-06	3.31225	down	1.18806	down	1.44504	down	1.50961	down	---NA---		tha4 hcf106 protein	3.79262e-27
CUST_70852_PI422552764	contig02051	0.000368486	3.13329	up	4.31486	up	1.76026	up	3.05551	up	---NA---		---NA---
CUST_47701_PI422552764	contig02053	3.00398e-05	1.7055	down	3.08513	up	1.13276	up	1.5497	up	---NA---		---NA---
CUST_47702_PI422552764	contig02053	7.59886e-05	1.61884	down	3.52083	up	1.05191	up	1.47241	up	---NA---		---NA---
CUST_47703_PI422552764	contig02053	2.14555e-05	1.3714	down	3.78892	up	1.13583	up	1.88008	up	---NA---		---NA---
CUST_47704_PI422552764	contig02055	0.000168927	4.4901	up	1.51645	up	1.63972	up	1.02797	down	---NA---		---NA---
CUST_47705_PI422552764	contig02055	1.62808e-05	4.22731	up	1.63517	up	2.15504	up	1.23458	up	---NA---		---NA---
CUST_47706_PI422552764	contig02055	1.18679e-05	4.29457	up	1.44299	up	1.46681	up	1.07446	down	---NA---		---NA---
CUST_76294_PI422552764	contig02056	3.05027e-07	22.4627	down	1.14802	up	2.44471	down	1.67102	up	---NA---		carbohydrate binding family 6	4.73147e-87
CUST_76295_PI422552764	contig02056	3.04945e-07	21.688	down	1.21206	up	2.41655	down	1.75892	up	---NA---		carbohydrate binding family 6	4.73147e-87
CUST_76296_PI422552764	contig02056	2.67041e-07	22.2976	down	1.11732	up	2.4906	down	1.76923	up	---NA---		carbohydrate binding family 6	4.73147e-87
CUST_41741_PI422552764	contig02060	0.0025742	1.33791	up	2.5299	up	1.41419	up	1.51149	up	---NA---		---NA---
CUST_78509_PI422552764	contig02061	0.000475935	2.75695	up	1.11358	down	1.19035	up	1.38195	up	y637_pelld ame: full=upf0301 protein plut_0637	2.27366e-18	protein	2.7326e-116
CUST_78510_PI422552764	contig02061	0.00295585	3.80802	up	1.29554	up	1.68316	up	1.71435	up	y637_pelld ame: full=upf0301 protein plut_0637	2.27366e-18	protein	2.7326e-116
CUST_42541_PI422552764	contig02062	8.56083e-05	2.64739	up	1.86563	down	3.01995	up	1.3371	down	---NA---		---NA---
CUST_42542_PI422552764	contig02062	2.94126e-06	1.70022	up	1.97397	down	2.5271	up	1.72586	down	---NA---		---NA---
CUST_42543_PI422552764	contig02062	0.000374329	3.79073	up	1.87304	down	3.65677	up	2.02815	down	---NA---		---NA---
CUST_42133_PI422552764	contig02066	0.00281431	2.35991	up	3.88944	up	1.5324	up	1.53038	up	---NA---		---NA---
CUST_42134_PI422552764	contig02066	0.00031291	3.73094	up	4.59085	up	1.53671	up	1.50908	up	---NA---		---NA---
CUST_42135_PI422552764	contig02066	4.3336e-05	2.31414	up	4.53582	up	1.64726	up	1.7635	up	---NA---		---NA---
CUST_72016_PI422552764	contig02067	4.01903e-05	2.54137	down	1.76513	down	1.03024	up	1.89678	down	---NA---		---NA---
CUST_72017_PI422552764	contig02067	2.7701e-05	2.57059	down	1.46868	down	1.10726	up	1.45792	down	---NA---		---NA---
CUST_72018_PI422552764	contig02067	0.00230098	2.30284	down	2.03567	down	1.06411	down	2.14333	down	---NA---		---NA---
CUST_56585_PI422552764	contig02068	0.000250733	1.7388	down	2.06327	down	1.53985	down	1.40286	down	---NA---		---NA---
CUST_73096_PI422552764	contig02070	1.98113e-06	3.07691	up	1.31193	up	1.8343	up	1.79939	up	---NA---		---NA---
CUST_73097_PI422552764	contig02070	1.70844e-06	3.25899	up	1.3017	up	1.87057	up	2.04054	up	---NA---		---NA---
CUST_73098_PI422552764	contig02070	8.00493e-06	2.80643	up	1.19843	up	1.69415	up	1.88248	up	---NA---		---NA---
CUST_74114_PI422552764	contig02071	0.000162687	1.39386	down	4.15773	up	1.44757	down	1.50584	up	enga_cyaa5 ame: full=gtp-binding protein enga	5.44065e-102	gtp-binding protein	0
CUST_74115_PI422552764	contig02071	0.000184887	1.14329	down	4.55466	up	1.37318	down	1.24731	up	enga_cyaa5 ame: full=gtp-binding protein enga	5.44065e-102	gtp-binding protein	0
CUST_57656_PI422552764	contig02073	0.0037958	6.82971	up	1.67487	up	1.30228	up	1.44966	up	---NA---		conserved unknown protein [Ectocarpus siliculosus]	1.03023e-29
CUST_57657_PI422552764	contig02073	0.000238183	3.87719	up	1.29323	up	1.55761	down	1.01362	up	---NA---		conserved unknown protein [Ectocarpus siliculosus]	1.03023e-29
CUST_74488_PI422552764	contig02075	2.08248e-10	41.8642	up	1.51226	up	4.64492	up	1.20983	down	---NA---		---NA---
CUST_74489_PI422552764	contig02075	2.69841e-08	26.4667	up	1.11622	up	2.86724	up	1.59568	down	---NA---		---NA---
CUST_74490_PI422552764	contig02075	5.57724e-09	8.36297	up	1.16392	up	1.33096	up	1.02926	down	---NA---		---NA---
CUST_57815_PI422552764	contig02077	0.00411885	3.31074	down	1.11118	up	2.19397	down	1.97501	down	rs4_pelub ame: full=30s ribosomal protein s4	1.71445e-08	ribosomal protein s4	3.9083e-103
CUST_70270_PI422552764	contig02081	9.53714e-08	2.70309	down	1.15222	up	1.0547	down	1.03953	down	---NA---		conserved unknown protein [Ectocarpus siliculosus]	4.64953e-33
CUST_70271_PI422552764	contig02081	7.4122e-07	3.04737	down	1.06326	down	1.06901	down	1.28184	down	---NA---		conserved unknown protein [Ectocarpus siliculosus]	4.64953e-33
CUST_70272_PI422552764	contig02081	3.31679e-07	2.85205	down	1.15957	down	1.04051	down	1.24249	down	---NA---		conserved unknown protein [Ectocarpus siliculosus]	4.64953e-33
CUST_73063_PI422552764	contig02082	2.70201e-10	46.465	down	1.01964	up	2.78455	down	1.36887	up	---NA---		---NA---
CUST_73064_PI422552764	contig02082	2.13369e-10	48.7057	down	1.11324	down	2.99198	down	1.20557	up	---NA---		---NA---
CUST_73065_PI422552764	contig02082	4.14577e-11	84.8017	down	1.01126	down	3.06459	down	1.66748	up	---NA---		---NA---
CUST_76144_PI422552764	contig02084	7.82486e-10	6.72874	down	2.01632	up	1.59653	down	2.45143	up	rir2_trybb ame: full=ribonucleoside-diphosphate reductase small chain ame: full=ribonucleotide reductase small subunit ame: full=ribonucleotide reductase r2 subunit	1.95645e-73	protein	4.6174e-103
[truncated: 21,478 more rows]
